# Supplementary material for: Olfactory function in the trace amine-associated receptor family (TAARs) evolved twice independently
Source: PubMed Central journal article supplement (PMC8032801; doi:10.1038/s41598-021-87236-5), 2021-04-08
Supplement: 41598_2021_87236_MOESM1_ESM.pdf [file 41598_2021_87236_MOESM1_ESM.pdf]

## SUPPLEMENTARY INFORMATION

### **Olfactory function in the trace amine-associated receptor family (TAARs) evolved twice independently**

Milan Dieris<sup>1</sup>, Daniel Kowatschew<sup>1</sup>, and Sigrun I. Korsching<sup>1\*</sup>

<sup>1</sup>Institute for Genetics, University at Cologne, Germany

\*Corresponding author, [sigrun.korsching@uni-koeln.de](mailto:sigrun.korsching@uni-koeln.de)

## SUPPLEMENTARY INFORMATION

### Table of Contents

#### **Olfactory function in the trace amine-associated receptor family (TAARs) evolved twice independently**

Milan Dieris<sup>1</sup>, Daniel Kowatschew<sup>1</sup>, and Sigrun I. Korsching<sup>1\*</sup>

<sup>1</sup>Institute for Genetics, University at Cologne, Germany

\*Corresponding author, [sigrun.korsching@uni-koeln.de](mailto:sigrun.korsching@uni-koeln.de)

|                               |                                                                                       |
|-------------------------------|---------------------------------------------------------------------------------------|
| <b>Supplementary File 1</b>   | Treefile for phylogenetic tree shown in Figure 1                                      |
| <b>Supplementary File 2</b>   | Amino acid sequences used in phylogenetic trees                                       |
| <b>Supplementary Figure 1</b> | Phylogenetic tree for <i>htr4</i> in deuterostomes and inferred gene gain/loss events |
| <b>Supplementary Figure 2</b> | No correlation between genome coverage and detection of <i>taar</i> genes             |
| <b>Supplementary Table 1</b>  | Genomic location of all genes analysed                                                |
| <b>Supplementary Table 2</b>  | Intron position in <i>htr4</i> , <i>taar</i> and <i>tarl</i> genes                    |

## SUPPLEMENTARY INFORMATION

SI File 1: Treefile for phylogenetic tree shown in Figure 1

### **Olfactory function in the trace amine-associated receptor family (TAARs) evolved twice independently**

Milan Dieris<sup>1</sup>, Daniel Kowatschew<sup>1</sup>, and Sigrun I. Korsching<sup>1\*</sup>

<sup>1</sup>Institute for Genetics, University at Cologne, Germany

\*Corresponding author, [sigrun.korsching@uni-koeln.de](mailto:sigrun.korsching@uni-koeln.de)

(Dr-hrh3:0.24676539,Dr-hrh4:0.31957204,(Rt-hrh3:0.41577716,((((Dr-chrm2a:0.23836639,Mm-chrm4:0.15876449)0.999850:0.30016013,(Pm-chrm:0.36384753,(Mm-chrm1:0.27092826,(Dr-chrm3b:0.25374974,Rt-chrm:0.14654995)0.999850:0.06305782)0.996034:0.05868278)0.935389:0.05795016)0.999850:0.08692529,((Cin-chrm:0.90410508,Csa-chrm:0.38530661)0.999850:0.30891539,Csa-chrm:0.75119528)0.822525:0.04832224)0.913698:0.04206302,Bbe-chrm:0.62263541)0.999850:0.30296837,((Mm-hrh1:0.39115068,Dr-hrh1:0.47328549)0.999850:0.59562034,(((Alu-hrh2:0.06917687,Bfl-hrh2:0.02587605)0.999850:0.48651330,(Le-hrh2:0.23961964,Rt-hrh2:0.11097566)0.999850:0.19464467,(Rat-hrh2:0.36840916,(Dr-hrh2b:0.58668493,Dr-hrh2:0.37509001)0.999850:0.18502646)0.306735:0.07434492)0.999850:0.36009870)0.999850:0.30122204,(((Alu-drd1:0.02611853,Bfl-drd1:0.07043786)0.999850:0.52964915,((Pm-drd1-li:0.14750967,(Cm-drd1:0.05162892,(Mm-drd1a:0.13497337,Rt-drd1:0.07698318)0.937383:0.02947751)0.999850:0.10111717)0.502579:0.03646106,(Mm-drd5:0.17413011,(Le-drd5:0.14196214,Rt-drd5:0.26380078)0.999850:0.09521429)0.808687:0.03142950)0.999850:0.37198577)0.999850:0.28416326,(Alu-adrb:0.58475677,((Cin-adrb:0.14988489,Csa-adrb:0.20795392)0.999850:0.62433763,(Lec-adrb:0.36176346,(Rat-adrb:0.32673892,(Mm-adrb1:0.27618311,(Cm-adrb1:0.07820835,Rt-adrb:0.13868889)0.999850:0.12767985)0.999850:0.20560585)0.999850:0.15101689)0.999850:0.22256097)0.999850:0.26777162)0.998122:0.13475217)0.846944:0.03065414,((Dr-htr6:0.34249903,(Mm-htr6:0.28831387,Rt-htr6:0.21947107)0.879382:0.14452807)0.999850:0.95530190,(((Csa-htr2:0.63733999,(Dr-htr2b:0.36358147,Rat-htr2A:0.34696960)0.999850:0.29260830)0.999850:0.65214280,(Cin-AmR:2.56284993,(Csa-AmR2:1.83930779,Csa-AmR1:2.18937513)0.652523:0.27755418)0.935928:0.34853373)0.976307:0.15996515,(((Lec-htr4:0.01447018,Pm-htr4:0.00000054)0.999850:0.31774254,(Cm-htr4-li:0.10684636,(Lo-htr4-li:0.06786645,(Ga-htr4lik:0.13298571,(Aj-htr4-li:0.05030884,Dr-htr4-li:0.16972196)0.000000:0.00000162)0.999850:0.05322457)0.999850:0.13535638,(((Le-htr4:0.06002770,(Cm-htr4:0.12449484,Rt-htr4:0.05276104)0.544556:0.01172978)0.999850:0.10337016,(Mm-htr4:0.12240354,(Np-htr4:0.01628215,(Xt-htr4:0.01129608,Xl-htr4.S:0.01570625)0.999850:0.05670638)0.999850:0.04268385)0.999850:0.04918023)0.999850:0.03513551,(Lo-htr4:0.03415163,(Ga-htr4:0.07239665,Dr-htr4:0.06816315)0.985516:0.03280411)0.999850:0.08625416)0.999850:0.10721738)0.739533:0.04739138)0.999850:0.14849016)0.999850:0.43652049,(((Mm-taar1:0.47286937,Dr-tar1b:0.65063192)0.992733:0.13289159,(Ga-tar21a-:0.85976240,(Ga-tar27-I:0.42004456,(Dr-tar10a:0.40339781,Dr-tar11:0.70454644)0.999850:0.16877051)0.737848:0.04487660)0.999850:0.08751675)0.999048:0.11637536,(((Cm-cls2a:0.26362720,Rt-cls2b:0.42091354)0.982990:0.07348347,(Cm-cls2b:0.29718849,(Rt-cls2a:0.38477040,((Cm-cls2c:0.22800950,(Le-cls2a:0.24803889,Rt-cls2d:0.17367670)0.999850:0.18426999)0.999850:0.20575142,Rt-cls2c:0.52690554)0.459606:0.01598639)0.999850:0.05975314)0.999850:0.07420491)0.999850:0.09443532,(((Lo-tar12a:0.18054532,(Lo-tar12b:0.12938879,Lo-tar12c:0.27394026)0.999850:0.08321977)0.748286:0.02949065,(((Aj-tar12c:0.00814908,(Ar-tar12c:0.00876208,Aa-tar12c:0.01656724)0.997964:0.00866131)0.999850:0.14404883,((Ar-tar12d:0.00395044,(Aj-tar12d:0.00943753,Aa-tar12d:0.00000028)0.000000:0.00000028)0.999850:0.03718766,((Aj-tar12h:0.00804933,Ar-tar12h:0.01113030)0.999850:0.11564816,((Ar-tar12f:0.11504179,(Ar-tar12e:0.02987765,Aa-tar12e:0.11768555)0.941465:0.01560763,(Aj-tar12f:0.06683651,(Aj-tar12e:0.03433596,(Ar-tar12g1:0.01079682,Ar-tar12g2:0.03091654)0.917417:0.02159438)0.985757:0.01390477)0.999850:0.02282665)0.999850:0.01267671)0.999850:0.01191076,((Aa-tar12f:0.00480622,Ar-tar12j:0.02355438)0.999850:0.14515184,(Ar-tar12k:0.03907353,(Ar-tar12l:0.03786379,(Aj-tar12i:0.00545890,Ar-tar12i:0.00000035)0.999850:0.01991054)0.999850:0.03340989)0.999850:0.06410289)0.988824:0.01320005)0.994335:0.01490175)0.998461:0.01964048)0.995160:0.03455531)0.

999850:0.12777468, ((Aa-tar12g:0.00000019, Aj-tar12g:0.00784727)0.999850:0.13180745, ((Aa-tar12b:0.00573801, (Ar-tar12b:0.00812923, Aj-tar12b:0.06735604)0.966324:0.00502469)0.999850:0.24749391, (Aj-tar12a:0.00271621, (Aa-tar12a:0.00811185, Ar-tar12a:0.00000001)0.960572:0.00267639)0.999850:0.07767642)0.999850:0.05604820)0.951539:0.03876976)0.999850:0.15498306, ((Dr-tar12m:0.23793387, ((Dr-tar12h:0.02570174, Dr-tar12k:0.07649903)0.999850:0.05092943, (Cc-tar12a:0.02397292, (Pp-tar12a:0.04788727, (Sg-tar12f:0.00000093, Sr-tar12f:0.00000001)0.544221:0.00592596)0.563879:0.00937587)0.991819:0.01610977)0.999850:0.07134487, ((Dr-tar12j:0.06492526, (Cc-tar12b:0.03705748, (Pp-tar12b:0.06894633, ((Sg-tar12b:0.02395853, Sg-tar12a:0.00295171)0.984267:0.00307609, ((Sa-tar12b:0.02677800, Sa-tar12a:0.00000031)0.998194:0.00317267, (Sr-tar12g:0.07091753, (Sr-tar12a:0.00000001, Sr-tar12b:0.00592408)0.971666:0.00296089)0.000000:0.00000018)0.999850:0.00591075)0.999850:0.01432180)0.674955:0.00429501)0.999850:0.01958542)0.999850:0.02512534, (((Pp-tar12d:0.04091879, Pp-tar12e:0.04646179)0.999850:0.03658701, (((Dr-tar12g:0.08008580, (Dr-tar12e:0.01488872, Dr-tar12f:0.01813567)0.999850:0.06589440)0.999850:0.03126015, (Dr-tar12i:0.13223268, (Dr-tar12c:0.02624894, (Dr-tar12d:0.00000030, (Dr-tar12a:0.04514789, Dr-tar12b:0.07332299)0.999850:0.08360211)0.999850:0.07349344)0.999850:0.01518082)0.999850:0.02343658)0.999850:0.04842838, ((Cc-tar12f:0.10882398, ((Sr-tar12e:0.03397657, (Sg-tar12e:0.04401597, Cc-tar12g:0.04360600)0.992603:0.00945485)0.999850:0.03326054, ((Cc-tar12h:0.02079783, (Cc-tar12i:0.05243736, (Cc-tar12j:0.03979989, (Cc-tar12k:0.01399765, (Cc-tar12l:0.00463105, Cc-tar12m:0.03379334)0.999850:0.02308023)0.887640:0.01068143)0.854200:0.01163611)0.785441:0.00638242)0.999850:0.04926907, (Cc-tar12n:0.05298771, Cc-tar12o:0.02590717)0.999850:0.03107037)0.987571:0.01294766)0.927221:0.00968768)0.999850:0.02436811, (Cc-tar12e:0.06577515, (Sg-tar12d:0.01614013, (Sr-tar12d:0.03170200, Sa-tar12d:0.01619842)0.865510:0.00638801)0.999850:0.07440204)0.979219:0.01334920)0.999850:0.01539858)0.999850:0.02294015, Lw-tar12a:0.06612126)0.722060:0.00708304)0.999850:0.05850233, (Pp-tar12c:0.05255924, (Cc-tar12d:0.40881748, (Cc-tar12c:0.02588532, (Sg-tar12c:0.00816445, (Sa-tar12c:0.02014348, Sr-tar12c:0.01689451)0.998338:0.00585038)0.999850:0.01793162)0.999850:0.03496443)0.977413:0.02777406)0.999850:0.04822927)0.999850:0.02972271)0.999850:0.04268421)0.993519:0.04152698)0.999850:0.22361345, ((Ip-tar12a:0.17138516, ((Pyn-tar12a:0.02009761, (Pyn-tar12b:0.02068766, Pyn-tar12c:0.03280130)0.999850:0.05976457)0.999850:0.07537298, (Am-tar12a:0.07706711, Am-tar12b:0.09407007)0.999850:0.07985748)0.999850:0.03983179)0.999850:0.05569566, (Pyn-tar12d:0.20535798, (Ip-tar12b:0.19621199, (Am-tar12c:0.07799056, Pyn-tar12e:0.11281833)0.991016:0.01677973)0.999850:0.06658912)0.999850:0.03937316)0.999850:0.08589536)0.999850:0.21912920)0.999850:0.10690216)0.999850:0.27679921, (Mm-taar4:0.45766329, (Mm-taar2:0.34412764, Mm-taar3:0.27603507)0.999850:0.31178757)0.688286:0.04163315)0.998602:0.05435799)0.97888:0.07804196, ((Lo-tar5lik:0.66061107, (Mm-taar5:0.56053515, (Mm-taar9:0.15928548, (Mm-taar6:0.14327703, Mm-taar8a:0.12944958)0.999850:0.15251723)0.999850:0.46925230)0.999850:0.13908051)0.993268:0.07608524, ((Dr-tar14f:0.98757554, (Dr-tar15a:0.82108800, ((Ga-tar22a-:0.35568860, (Tr-tar28a-:0.78518174, (Ga-tar24-I:0.28871230, (Ga-tar23-I:0.60883589, (Ga-tar25a-:0.16826710, Ga-tar26a:0.33962781)0.999850:0.06959879)0.971852:0.05020380)0.881394:0.04426853)0.926899:0.06929933)0.999850:0.46976838, (Dr-tar16a:0.64229491, ((Dr-tar19a:0.12204469, Dr-tar20a:0.11122322)0.999850:0.10733284, (Dr-tar18a:0.22245523, Dr-tar17a:0.29441052)0.716708:0.06273417)0.999850:0.34693412)0.962490:0.11711218)0.912624:0.08623902)0.999850:0.19686514)0.999850:0.35523809, (Lo-tar13a:0.26726476, (((Aj-tar13a:0.00779644, (Ar-tar13a:0.00000014, Aa-tar13a:0.00381538)0.950006:0.00325376)0.999850:0.05271148, ((Ar-tar13b1:0.00970426, Aj-tar13b2:0.01536613)0.999850:0.01245774, (Aa-tar13b:0.00692736, (Ar-tar13b2:0.00311520, Aj-

tar13b1:0.01680001)0.984206:0.00989090)0.994834:0.00990322)0.981299:0.00989772)0.999850:0.11519119, ((Aj-tar13d1:0.03220012, (Ar-tar13d2:0.00931293, (Aj-tar13d2:0.01346970, (Ar-tar13d1:0.01360259, Aa-tar13d:0.00537461)0.999043:0.01017662)0.995490:0.00848632)0.999850:0.04700179)0.999850:0.04112657, (Aj-tar13c:0.00875369, (Aa-tar13c:0.00417586, Ar-tar13c:0.00822931)0.000000:0.00000040)0.999850:0.01235655)0.857921:0.01756646, ((Aj-tar13f:0.01745246, (Aj-tar13e:0.00368234, (Aa-tar13e:0.00000001, Ar-tar13e:0.00000013)0.999850:0.01617792)0.999850:0.10280276)0.994569:0.01079701, (Ar-tar13f:0.00805903, Aj-tar13g:0.05992404)0.999850:0.01285237)0.999850:0.07848675)0.999850:0.06048049)0.999850:0.04451128, ((Sf-tar13c:0.01625874, Sf-tar13d:0.01386470)0.999850:0.01339674, (Sf-tar13a:0.01102512, Sf-tar13b:0.03502087)0.987019:0.00638151)0.999850:0.28355183, ((El-tar13a:0.14022865, (Ss-tar13a:0.00301377, (Ss-tar13c:0.03912318, Ss-tar13b:0.01425134)0.999850:0.01483281)0.999850:0.04852575)0.999850:0.11595228, ((Gm-tar13b:0.04234700, (Gm-tar13a:0.00733455, Gm-tar13c:0.03392359)0.736141:0.00799303)0.999850:0.18728793, ((Lb-tar13a:0.03347673, (Lb-tar13b:0.03355368, (Lb-tar13d:0.12210882, Lb-tar13c:0.01184002)0.999850:0.06299901)0.999850:0.06428006)0.999850:0.11256138, ((Af-tar13b:0.03457169, Af-tar13a:0.00466834)0.999850:0.06594195, (Ser-tar13b:0.02551372, (Sem-tar13b:0.00000107, Sea-tar13b:0.01894113)0.999850:0.03623446, (Ga-tar13a:0.14153540, (Sea-tar13c:0.04422314, (Sn-tar13a:0.00000015, Ser-tar13a:0.00567326)0.858136:0.00688223, (Sem-tar13a:0.00423764, (Ses-tar13a:0.01024607, Sea-tar13a:0.00797969)0.000000:0.00323865)0.195938:0.00479574)0.999850:0.07038173)0.949204:0.01349270)0.985289:0.01068051)0.536452:0.00731494)0.999850:0.02250446)0.999850:0.02300753, ((Lc-tar13a:0.00765520, (Lc-tar13b:0.00000016, Lc-tar13c:0.04943454)0.999850:0.02896777)0.999850:0.08117975, (Dl-tar13b:0.02460219, (Dl-tar13a:0.03654104, Ms-tar13a:0.06694012)0.999850:0.06231328)0.999850:0.04585415)0.989539:0.01543483)0.860158:0.01061630)0.972828:0.02922728, (Lac-tar13a:0.00452572, Lac-tar13b:0.06418852)0.999850:0.05161364)0.999850:0.13408344)0.999850:0.15944205)0.999850:0.10551301, (Ch-tar13a:0.19757730, ((Cc-tar13a:0.01692920, (Sr-tar13a1:0.00557530, (Sg-tar13a:0.00841202, (Sr-tar13a2:0.13591302, Sa-tar13a:0.00841998)0.000000:0.00000019)0.000000:0.00000019)0.999850:0.01124200)0.999850:0.02182515, ((Cc-tar13b:0.03206733, (Sa-tar13b:0.05292088, (Sg-tar13b:0.04413214, Sr-tar13b:0.03287993)0.999850:0.01420815)0.999850:0.03264201, (Sa-tar13e:0.00281525, (Sg-tar13e:0.00577988, Sr-tar13e:0.14016125)0.862251:0.00264096)0.999850:0.00828842)0.844949:0.00376549)0.999850:0.02273577, (Cc-tar13c:0.01508147, (Sr-tar13c1:0.01336076, (Sr-tar13c2:0.00640174, (Sg-tar13c:0.00000016, Sa-tar13c:0.00839394)0.000000:0.00000031)0.998726:0.00667546)0.999850:0.01211544)0.999850:0.01569366)0.999850:0.01795155, ((Pp-tar13b:0.03096006, Pp-tar13a:0.03582113)0.999850:0.03333564, (Lw-tar13a:0.02719176, Lw-tar13b:0.04858004)0.696482:0.00602324)0.999850:0.01886724, (Dr-tar13e:0.07606128, (Dr-tar13c:0.07441344, (Dr-tar13d:0.06238559, ((Cc-tar13d:0.00000001, Cc-tar13e:0.09533489)0.999850:0.01711990, (Sg-tar13d:0.01100950, (Sr-tar13d:0.00550158, Sa-tar13d:0.00570233)0.973362:0.00294877)0.999850:0.01740367)0.999850:0.04845768, (Dr-tar13a:0.01718376, Dr-tar13b:0.06049293)0.999850:0.02521716)0.999850:0.04066857)0.667987:0.00744833)0.985131:0.01240770)0.999850:0.02386771)0.941923:0.00875673)0.999850:0.02030331)0.999850:0.16272222, ((Am-tar13a:0.14339943, (Pyn-tar13a:0.00890797, (Pyn-tar13b:0.04445325, (Pyn-tar13c:0.01727276, Pyn-tar13d:0.02111060)0.999850:0.02772502)0.521059:0.01093092)0.999850:0.07365720)0.999850:0.04888871, (Ip-tar13a:0.15731666, ((Ip-tar13b:0.03472637, Ip-tar13c:0.04162423)0.999850:0.05643079, ((Ip-tar13e:0.06479198, Ip-tar13d:0.03252145)0.999850:0.09204287, (Ip-tar13f:0.13469696, (Ip-tar13g:0.00000348, Ip-tar13h:0.03529954)0.999850:0.20623584)0.999850:0.10678970)0.999850:0.04925202)0.999850:0.05621948)0.999850:0.09038305)0.999850:0.13110683)0.999850:0.09480200)0.992587:0.04579693)0.999850:0.06393921)0.970204:0.02466895)0.999850:0.08719527)0.

999850:0.20141635)0.999850:0.10696582)0.999850:0.08932990)0.999850:0.12922095)0.  
999850:0.42528632,(((Lec-tar11a:0.00790559,(Pm-tar11a:0.03964542,(Lec-  
tar11b:0.02222799,Lec-  
tar11c:0.02889833)0.999850:0.01642326)0.957502:0.01996955)0.999850:0.61564000,  
((((Lec-tar14a:0.00289775,(Pm-tar14b:0.01524309,Pm-  
tar14a:0.01439959)0.999850:0.01844590)0.999850:0.15947466,((Lec-  
tar14d:0.04011483,Lec-tar14c:0.03838594)0.999850:0.09627386,(Lec-  
tar14b:0.00485790,Laf-  
tar14a:0.00819095)0.975954:0.01497276)0.999850:0.18046179)0.999850:0.44728635,  
(Lec-tar14e:0.82081613,(Pm-tar12c:0.00362599,(Lec-tar12b:0.10219182,Pm-  
tar12b:0.06021135)0.999850:0.12322465)0.999850:0.54875578)0.764686:0.11198326)0.  
994446:0.07611584,(((Lec-tar12a:0.03175478,Pm-  
tar12a:0.01494592)0.999850:0.74436496,(Lec-tar15a:0.01146574,pm-  
tar15a:0.02067713)0.999850:0.44949316)0.466301:0.02596798,(Lec-  
tar15d:0.50822464,(Lec-tar15c:0.02401233,(Pm-tar15d:0.00000470,(Pm-  
tar15c:0.00527240,(Pm-tar15b:0.00585350,Lec-  
tar15b:0.10955285)0.999850:0.02184534)0.999850:0.02783344)0.629689:0.01537419)0.  
999850:0.45299650)0.985217:0.05885009)0.999850:0.09899452,(((Lec-  
tar16a:0.03486141,(Pm-tar16a:0.01255669,(Laf-tar16a:0.01062480,Lec-  
tar16b:0.00258494)0.999850:0.00865363)0.711376:0.01753955)0.999850:0.49363316,  
(((Lec-tar16c:0.06353737,(Pm-tar16b:0.03189020,(Lec-tar16d:0.02360581,(Lec-  
tar16e:0.01975643,(Lec-tar16f:0.01336302,(Laf-tar16c:0.03408358,Lec-  
tar16g:0.01055989)0.974021:0.00357735)0.999850:0.02325161)0.942163:0.00992531)0.  
999850:0.03676819)0.999850:0.07315397)0.999850:0.33694385,(((Lec-  
tar16i:0.00000001,Laf-tar16b:0.01219393)0.940314:0.02007576,(Pm-  
tar16d:0.00795676,(Lec-tar16h:0.03153758,Pm-  
tar16c:0.01479214)0.999850:0.04047097)0.968951:0.00967778)0.942999:0.01484531,  
(Lec-tar16j:0.03565165,Pm-  
tar16e:0.02645303)0.999850:0.04295404)0.999850:0.30685157)0.999850:0.12712469,  
((((Lec-tar16n:0.03364649,Pm-tar16i:0.00873626)0.999850:0.13403607,((Pm-  
tar16j:0.00000104,(Lec-tar16o:0.00000001,Laf-  
tar16f:0.00534264)0.999850:0.04049846)0.999850:0.17363902,(Pm-tar16k:0.03308196,  
(Lec-tar16p:0.02074477,Lec-  
tar16q:0.01692187)0.985698:0.00644355)0.905458:0.03179745)0.999850:0.08675412)0.  
999850:0.33513899,((Lec-tar16r:0.01696365,Laf-  
tar16e:0.00000001)0.999850:0.40159401,(Lec-tar16s:0.26979955,Lec-  
tar16t:0.52131849)0.999850:0.09518288)0.786130:0.04924264)0.999850:0.10898678,  
((Lec-tar16k:0.03344189,Pm-tar16f:0.02597226)0.999850:0.41710925,((Pm-  
tar16g:0.02229045,(Laf-tar16d:0.01036545,Lec-  
tar16l:0.00386400)0.934531:0.01110469)0.999850:0.23529956,(Lec-  
tar16m:0.03817321,Pm-  
tar16h:0.02752742)0.999850:0.42848729)0.999850:0.12938913)0.999850:0.06464249)0.  
999236:0.05994753)0.999850:0.07875798)0.999850:0.08810353,(((Lec-  
tar16u:0.01664756,(Pm-tar16l:0.00715776,Laf-  
tar16g:0.02226184)0.848347:0.00379002)0.999850:0.04210666,(Lec-  
tar16v:0.02597421,Pm-tar16m:0.02783418)0.999850:0.05641701)0.999850:0.44722365,  
((Lec-tar16w:0.01491882,Pm-tar16n:0.03198923)0.990937:0.03148620,(Lec-  
tar16x:0.02784344,Pm-  
tar16o:0.03180105)0.999850:0.03940143)0.999850:0.38916381)0.708841:0.03646831)0.  
999850:0.26440039,((Lec-tar17a:0.00298804,Pm-  
tar17a:0.03134323)0.999850:0.47454781,((Lec-tar17b:0.00491188,Pm-  
tar17b:0.06725972)0.999850:0.57383671,((Lec-tar17c:0.26523731,(Lec-  
tar17d:0.00000046,Pm-tar17c:0.03434303)0.999850:0.36000327)0.999850:0.24896426,  
(((Lec-tar17e:0.00385461,Pm-tar17d:0.10895670)0.999850:0.22244149,(Lec-  
tar17f:0.13617660,(Lec-tar17g:0.01788309,Pm-  
tar17e:0.01781698)0.999850:0.17792632)0.999850:0.16972834)0.999850:0.12654497,  
((Lec-tar17h:0.01028640,Laf-tar17a:0.01343017)0.999850:0.36945889,(Lec-  
tar17i:0.13667722,(Lec-tar17j:0.02482053,Pm-  
tar17f:0.02478946)0.999850:0.14603864)0.999850:0.12706298)0.999850:0.18717182)0.  
960833:0.05683235)0.999850:0.08169440)0.868813:0.09213515)0.999850:0.13505762)0.  
999850:0.08933318)0.999850:0.09295030)0.838359:0.03628224,(Lec-  
tar13a:0.42814318,(Lec-tar13b:0.06226201,(Lec-tar13c:0.02679438,pm-  
tar13a:0.04443766)0.999850:0.07369104)0.999850:0.50007288)0.755827:0.12345724)0.  
891077:0.09024302)0.999850:0.31353267,((Cm-tar12:0.31176007,(Le-

tarl2:0.23565455,Rt-tarl2:0.15758857)0.996185:0.07620260)0.999850:0.24853472,  
(Sf-tarl2:0.49918619,(Aj-tarl1b:0.01137974,Ar-  
tarl2:0.00786869)0.999850:0.44616302,((Lac-tarl2:0.29187657,To-  
tarl2:0.05991528)0.999850:0.15417700,(El-tarl2:0.16937719,Ss-  
tarl2:0.07597668)0.999850:0.14826643)0.999850:0.31692142)0.788585:0.08886947)0.9  
99850:0.42984240)0.999850:0.11059132,(Rt-tarl1:0.50923367,((Xl-  
tarl1:0.09910400,Xt-tarl1:0.10775413)0.999850:0.33285118,(Lo-tarl1:0.10323922,  
(Sf-tarl1:0.12563762,((Aa-tarl1:0.00000029,(Ar-tarl1:0.00261749,Aj-  
tarl1a:0.00259138)0.000000:0.00000029)0.999850:0.12027907,((Ch-tarl1:0.10262641,  
(((Pp-tarl1:0.01858616,Lw-tarl1:0.03155365)0.999850:0.01436198,(Dr-  
tarl1:0.04156523,((Cc-tarl1b:0.05632397,(Sr-tarl1b:0.00812572,Sa-  
tarl1b:0.02616002)0.958536:0.00270398)0.979026:0.00787914,(Cc-tarl1a:0.00266708,  
(Sr-tarl1a:0.00000016,(Sa-tarl1a:0.00533238,Sg-  
tarl1:0.01067265)0.000000:0.00000016)0.999850:0.00266459)0.000000:0.00000057)0.9  
66661:0.00586143)0.994466:0.01341841)0.999850:0.05853927,(Am-tarl1:0.03081778,  
(Pyn-tarl1:0.04687452,Ip-  
tarl1:0.09794416)0.826720:0.00821863)0.999850:0.02440495)0.996596:0.01749963)0.5  
32334:0.01292080,((El-tarl1:0.13722932,(Ss-tarl1a:0.00927277,Ss-  
tarl1b:0.06437863)0.999850:0.02658755)0.999850:0.08105330,((Gm-  
tarl1a:0.00127420,Gm-tarl1b:0.42766721)0.999850:0.18518614,(Cs-tarl1:0.19091618,  
(((Mom-tarl1:0.06765157,(Tn-tarl1:0.04186389,Tr-  
tarl1:0.07625170)0.999850:0.07433674)0.999850:0.02487177,((Lc-  
tarl1:0.02112798,Mim-tarl1:0.00000090)0.999850:0.02825699,(Dl-  
tarl1:0.00783973,Ms-  
tarl1:0.00511366)0.999850:0.00918174)0.279593:0.00100708)0.879229:0.00953156,  
(Moa-tarl1:0.07080778,((Lac-tarl1:0.03037344,((Stp-tarl1:0.02971128,((Ac-  
tarl1:0.02695655,(On-tarl1:0.00524976,(Mc-tarl1:0.00000033,(Nb-tarl1:0.00000013,  
(Pun-tarl1:0.00000001,(Hb-tarl1:0.00000001,Mz-  
tarl1:0.00000001)0.000000:0.00000001)0.999850:0.00262868)0.999850:0.00264770)0.0  
00000:0.00000014)0.999850:0.01458179)0.999850:0.04581122,(Ol-tarl1:0.09434025,  
(((Cn-tarl1:0.00530484,Cv-tarl1:0.00521121)0.999850:0.04867995,(Fh-  
tarl1:0.03502035,((Pf-tarl1:0.00000001,Pl-tarl1:0.00000001)0.997502:0.00267535,  
(Pom-tarl1:0.00000008,(Pr-tarl1:0.01357552,(Xc-tarl1:0.00000020,Xm-  
tarl1:0.00535488)0.999850:0.01090505)0.998810:0.00537351)0.000000:0.00000008)0.9  
99850:0.02757681)0.999850:0.01472702)0.999850:0.04587902,(Nf-tarl1:0.11003680,  
(Al-tarl1:0.04784582,Km-  
tarl1:0.03982676)0.987146:0.00895903)0.994477:0.01576753)0.999850:0.03594556)0.9  
96106:0.01527418)0.936378:0.00416069)0.999850:0.01098941,(Hc-tarl1:0.12617853,  
(To-tarl1:0.03909135,Pa-  
tarl1:0.04788713)0.930459:0.00584203)0.998936:0.01260964)0.999850:0.00560543)0.2  
59426:0.00086413,((Po-tarl1:0.01189317,(Py-tarl1:0.02412886,((Bp-  
tarl1:0.02920724,Sh-tarl1:0.04842456)0.999850:0.04217209,(Pem-  
tarl1:0.01728817,Ps-  
tarl1:0.00603865)0.981887:0.02646949)0.999850:0.30504727)0.422686:0.01350496)0.9  
99850:0.03716897,((Cr-tarl1:0.01990385,(Ga-tarl1:0.06524715,Af-  
tarl1:0.03384383)0.984652:0.00556149)0.999850:0.01158457,(Lb-tarl1:0.07349284,  
(Sea-tarl1:0.00255684,((Sem-tarl1:0.00000001,Ser-  
tarl1:0.00000001)0.000000:0.00000001,(Ses-tarl1:0.00000001,Sn-  
tarl1:0.00000001)0.000000:0.00000001)0.992038:0.00262522)0.999850:0.02345040)0.7  
88387:0.00291703)0.998026:0.00537921)0.903680:0.00269475)0.978453:0.00649630)0.9  
97087:0.00854861)0.966276:0.02031550)0.999850:0.06799505)0.999850:0.03122851)0.9  
99850:0.05678853)0.999850:0.10555999)0.308116:0.01911131)0.999850:0.12027883)0.9  
99850:0.14090067)0.872587:0.06596837)0.999850:0.18434663)0.999850:0.10044485)0.9  
97197:0.08460709)0.999850:0.18657277)0.999850:0.29189112)0.939191:0.07364608)0.7  
29914:0.07585926)0.988627:0.08820500)0.983243:0.08872837,((Bbe-  
adra1a:0.64679315,((Lec-adra1a:0.23458074,(Mm-adra1b:0.23533049,Le-  
adra1b:0.19923495)0.999850:0.06357804)0.911721:0.04397243,(Mm-  
adra1a:0.23300679,Cm-  
adra1a:0.24326976)0.999850:0.11099775)0.999850:0.36898840)0.999850:0.41588493,  
(((Cin-htr7:0.00000395,Csa-htr7:0.04612367)0.999850:0.68010327,(Mm-htr7:0.  
10076905,Dr-htr7:0.15283205)0.999850:0.47019512)0.999850:0.40484244,((csa-  
htr5:0.25016607,Cin-htr5:0.12237950)0.999850:0.86712258,((Dr-htr5ab:0.05212589,  
(Lec-htr5:0.35410227,Mm-  
htr5A:0.20915757)0.544329:0.03384083)0.999850:1.04410697,((Pm-



htr1A:0.19502890,Dr-htr1a:0.14727096)0.999850:0.46560421,((Dr-htr1fb:0.38708825,  
(Rt-htr1:0.20752853,Le-htr1:0.41538056)0.999850:0.25324809)0.999850:0.33727289,  
(Cm-htr1:0.57417121,(Mm-htr1b:0.16449281,(Rt-htr1b:0.09488161,Cm-  
htr1:0.08615613)0.999850:0.07376908)0.999850:0.18173144)0.999194:0.13595500)0.99  
9850:0.28573477)0.884827:0.07835355)0.816981:0.10703021)0.996015:0.12455004)0.48  
5399:0.10806823,((Bfl-adra2:0.70551685,(Cin-adra2:1.17609312,(Lec-  
adra2:0.32341982,(Mm-adra2a:0.24795619,Rt-  
adra2a:0.32128957)0.999850:0.16394205)0.999850:0.29020162)0.999850:0.26229161)0.  
999850:0.21639601,(((Mm-drd2:0.06640658,Dr-drd2:0.11280664)0.999850:0.13877443,  
(Dr-drd3:0.16357002,Mm-drd3:0.24148729)0.999850:0.12045762)0.999850:0.38127885,  
(Bfl-drd4:0.74278694,(Mm-drd4:0.39720084,Dr-  
drd4a:0.30691641)0.999850:0.43839955)0.999850:0.19418636)0.999850:0.25689291)0.9  
99850:0.16094289)0.969684:0.06486368)0.994392:0.09246650)0.999850:0.29462271)0.9  
99850:0.22886504)0.999850:0.94884052)0.921125:0.08144813);

## SUPPLEMENTARY INFORMATION

SI File 2: Amino acid sequences used in phylogenetic trees

### **Olfactory function in the trace amine-associated receptor family (TAARs) evolved twice independently**

Milan Dieris<sup>1</sup>, Daniel Kowatschew<sup>1</sup>, and Sigrun I. Korsching<sup>1\*</sup>

<sup>1</sup>Institute for Genetics, University at Cologne, Germany

\*Corresponding author, [sigrun.korsching@uni-koeln.de](mailto:sigrun.korsching@uni-koeln.de)

**Amino acid sequences of *taar* and *taar*-like genes (*tarl*)  
from jawless, cartilaginous and bony fish  
(for full species names see SI Table 1)**

**Table of Contents**

|                                                                                                                                                  |    |
|--------------------------------------------------------------------------------------------------------------------------------------------------|----|
| TAAR-like receptors (TARL).....                                                                                                                  | 2  |
| Jawless fish TARL.....                                                                                                                           | 2  |
| Cartilaginous fish and tetrapod TARL.....                                                                                                        | 18 |
| Bony fish TARL.....                                                                                                                              | 19 |
| TAAR receptors class II from bony fish and cartilaginous fish species .....                                                                      | 34 |
| Cartilaginous fish class II TAAR.....                                                                                                            | 34 |
| Bony fish class II TAAR.....                                                                                                                     | 35 |
| Reference TAAR sequences from all classes (class I, II, III) in several bony vertebrate<br>species (zebrafish, stickleback, fugu and mouse)..... | 69 |
| Aminergic receptors used as outgroup (species names, gene IDs: Suppl. Table 1).....                                                              | 77 |
| Deuterostome serotonergic receptor 4 .....                                                                                                       | 97 |

Most *taar* and *tarl* genes are monoexonic. Intron gains occurred rarely, and are indicated here by alternating blue and black color for the exons, with amino acids from codons spanning two exons in red. Frame shifts and stop codons are indicated by exclamation marks and asterisks, respectively.

# TAAR-like receptors (TARL)

## Jawless fish TARL

### *Lethenteron camtschaticum*

#### >Lec-tar1a

MDTPTSSVAAPSSPASSNSWEAPPPLPHCALVQGSFSCPGSALSSAQRAAWLATMSI AVASAVLGN  
LLVVASVLHFRRLQTRTNFAAASLAVADLLVGLLVMPFKMTRSAYGCWFYGTAFCAAHTCLDIALCT  
ASILHLACIAFDRHVAVCDPLRYAQRVTARHVTAMVALSWCCAAVISVVPVSLGWNVIGVPDEVVAA  
SCADSCDFLLGAPYAVGSSVISFFGPAAFVVVAYARILREARRQGRAIACEQRRHQRRQEQEKQQQNE  
QQQGRQEDTAGEGGLGGARGEMTGSEGIIGKGDGIGGIDERIGGRAEGIGTVGKIGSVFDGGRPTAA  
AGKSIWAGRAADAKSERNAKTLSIVVGVFLASWLPFFLVNVSDPLLGYSIDPRVWEAVTWLGYANS  
AANPVIYGIFSPNFRAAFRAIAARSAFRAGSRDAQLGF\*

#### >Lec-tar1b

MDPSTSSDAAPSSPASSNSWEAPPPLPHCALVQGSFSCCHGSALSSAQRAACLAMMSVAVASAVLGN  
LLVVASVLHFRRLQTRTNFAAASLAVADLLVGLLVMPFKMTRSAYGCWFYGTAFCAHTCLDIALCT  
ASILHLTCIAFDRHVAVCDPLRYAQRVAARHVTAMVALSWCCGAVISVVTVSLGRNVIGVPDEVVAA  
SCADSCDFLLGAPYAVGSSVISFFGPAAFVVVAYARILREARRQGRAIACEQRRHQRRQEQEKQQQNE  
HQQGRQEDRAGEGGLGGARGEMTGSEGIIGKGDGIGGI!  
ERRGGRAEGIGTVGKIGSVHEGGRPTTAAAGKSTRTVGRAVDAKSEHNATKTLSIVVGVFLASWLPF  
FLNVSDPLLGYSIDPRAWAVTWLGYANSAANPVIYGIFSPNFRAAFRAIAVRSTFRAGSRDAQLG  
F\*

#### >Lec-tar1c

MDTPSSSAAAPPSPASSNSWETPPPLPHCALVQGSFSCRGSAALSSAQRAACLATMSVAMASAVLGN  
LLVVIASVLHFRRLQTRTNFAAASLAVADLLVGLLVMPFKMTRSAYGCWFYGTAFCAHTCLDIALCT  
ASILHLACIAFDRHVAVCDPLRYAQRVAARHVTAMVALSWCCGAVISVVTVSLGWNVIGVPDEVVAA  
SCADSCDFLLGAPYAVGSSVISFFGPAAFVVVAYAQILREARRQGRAIACEQRRHQRRQEQKQQQQQ  
EDQQQGRQEDRAGGGRGARREITGSGGIVGKRDEIGGLEERRGGRVEGVGTGKIGLVLEEGIPTA  
AAGKSTRAVGRAVDAKSERNAKTLSIVVGVFLASWLPFFLMNVSDPLLGYSIDLRAWAVTWLGYA  
NSAANPVIYGMFSPNFRAAFRAIAARSTFRAGSRDAQLGF\*

#### >Lec-tar2a

VTFPAMALLIATWNASSPNDVLARYYGRTFCKAHTCLEYVFTTASILHLGAIADFDRHTAICDPLRYR  
QRITPRRVAHLLAASWLLPFLYVPPVSLGWNVVGVEEAARLSCPDSVVLKNVGFALVDTCCAFFA  
PTALMLVAYARIYRVARRQARQIAASSTGTVSVVAASVKQQQQQQQQNNLQQQGNEQQATFRRTMR  
REHNATKTLAII LGAFVVCWCPYFVASAVDPFVGFSTEPTLLSATLWLCYANSALNPVLYAAFNRRF  
RAAFSRIFCRKGNAAVVMVAAWRDRRRRPRPPPPACLEEEESDS\*

#### >Lec-tar2b

SSLTPSPLHPPLTPVLSPHPPLSHPPPLSLTRRYTARVTSGTVAAMLVACWLGPLLYVAPIMLGLQS  
VGAEALLALACPDDCPFVMSATFSLAATSCSFVAPMIIMLAAYARIYRVARRHARSIALRPPAPPGG

SDGAKGMAAASSSSSAPRRWRQEYNATKTLGVILGAFFALWLPFFSAAVADGLPGGPRVDGTTWHCV  
TWLGYVNSAVNPLLYASLNRAFRRAFGILFSPRELAKGRNADFTD\*

### >Lec-tarl3a

RQLQTRTNAFTLSLAVADLLVGLLVMPFSATRSLYGCWFFGATFCKVHTCMDFLFTTSSIFHLCAIA  
FDRHVAICDPLRYGARVSRRTVALLVALCWLVALLYVVPIMLGWNLVGIIEEVARSSCPGNCDLYLN  
TAFALTS AACGYAPMVGMVVAYARVYSVARAQSRVRRAEANRDRGVDERAGGKRKARTSLKREHNA  
TKTLGIIMGVFLVLWLPYASSIASAFSASSAIDPVAWDAFFWMGYSNSAINPVLACFNRSFRAAF  
RLLFSRRAFKASTRRLDLSSES\*

### >Lec-tarl3b

RQLQTRTNAFTLSLAVADLLVGLLVMPFSATRSLYGCWFFGRIFCKVHTCLDVLLSTASIAHLGAIA  
FDRHTAICDPLRYHQRLTANRAATLVALCWVGSALLAVGPIMLGWNTVGIIEELVASLSCP DACPFFM  
NAPFAIAGSTCSFFGPSFIMVVTYMRIYRVALRQARAVRN VVSVASVARQRCDIDSTPEQGRDQRRE  
RGATKTLGVIMGT FVICWLPFFSLTLLDPFTGFLAEPVWWEAATWLGYVNSALNPILYP AFNRTFR  
AFYLVFTCAWRSRNVRRSDLAE\*

### >Lec-tarl3c

RQLQTRTNAFTLSLAVADLLVGLLVMPFSATRSLYGCWFFGRIFCKVHTCLDILLSTASIAHLGAIA  
FDRHTAICDPLRYHQRLTAGRAAALVALCWVGSALLAVGPILLGWNTVGIIEELVASSCPDACVLLMN  
APFAIAAATYCF FAPS FVMVVTYMRIYRVALRQARAVRN VVPVSSVAWEHCDINSRPEKKT DQRRE  
SATKTLGIIMGAFVTCWLPYFSLTLLDPFTGFLAEPVWWESTAWLAYINSALNPILYP AFNRAFRQA  
FRLVFTCAWRSRNVRRANLA\*

### >Lec-tarl4a

MYMGKYASPALALNSSVQNGTFQSHCVLTQFNLVCRQPTVPPEYAEVILIAMIIISIIILNMFNTLII  
AAILYFKQLQVLPNAFTFSLSVADILVGVVMPFYMNQCVYNCWIFYGHAFCKVHHFLHAF LPTASTM  
HLCCIGYDRYLAICDPFHYQERFTRRTAAIALAATWLGSLLYVVPIMLDWIVIGIEEMVAERTCPDN  
CIEFFMNKVFSSCGAFFSFMLPMGIMTVTYAKIYRIARKQARSISGAQQHGMLGQTALGFNKQQAAMK  
REHNATKTVSIIILGIFMICWAPFFSTIVIDPYLNYTTKPVVWEMLNWIGHVNSAINPFLYGGFNRTF  
RNAIRIIFSRLLQPGIRSAEL\*

### >Lec-tarl4b

MNSSLALGLMDGDPGHNASHVEPLLCLIRESGLRCPARLSARTANIIFIAMIFSMVLNFLGNMTII  
TAISYFKQLQVLPNTFTFSLAVADIMVGVVMPFYMTQCVYDCWIFYSHAFCKVHHFLDAFISTASTM  
HLCCIAYDRYLAICDPMHYRERFTWKTAALLLAAAWLGSLLYVVPVMLGWIVIGIEDMMASRTCPDN  
CVFYMNKVFSSCGAFFSFVVPMTIMTLAYVKIYRVARKQARSISVQQQGSQKSGFNKQQAAMKRE  
HNATKTVSIIILGVFMFCWAPFFSTIVNDPWIDFKTNSIFWDIVNWFGHVNSAINPYLYGGFNRTFRN  
AIRIMFSRKFWQPGSRSAEL\*

### >Lec-tarl4c

MNSSLALGLMGGDPDHNASNVEPLICLIRESGLRCPARMSARIANIVLIIMIVTTVLNVLGNMTII  
MAISYFKQLQVLPNTFTFSLAVADIMVGVVMPFYTTQCVYDCWFFGQKFCVHHFLDAFMCTASTW  
HLCCIAYERYLAICDPMHYRQRFTWKTAALLLATAWLGTVLYVVPVMLGWIVIGIEDMMASRTCTDN  
CIFYMNKPFSSCGAVITFMVPTTVMTLAYAKIYRVARKQARSISIQQQGSQKSGFNKQQAAMKRE

HNATKTVSIIILGVFIFCYAPFFYTIVKDAWIDFRTNSFTWDMVNFVFGHVNSAINPYLYGGFNRAFRN  
AIRIMFSRKFQPGSRSDEL\*

#### >Lec-tarl4d

MNSSLALGLMDGDPDHNASNVEPLICLIRESGLLCRPARMSARIANI ILLIMIVTMVLNVLGNMTII  
MAISYFKQLQVLPNTFTLSLAVADIMVGVVMPFYTTQCVYDCWFYQTFCKVHHFLDAFVCTASTW  
HLCCIAYERYLAICDPMHYRERFTWKTAALLLVTIWLGTVFQVVPVMLGWIVIGIEDLMASRICKNN  
CIFYMNKTLS SCGAFLTFVVPVTVMTLAYAKIYRVARKQARSISIQQQSGQKSGFNKQQAAMKRE  
HNATKTVSIIILGVFIFCYAPFFYTIVKDPWIDFRTNSFTWDMVNWFGHVNSAINPYLYGGFNRAFRN  
AIRIMFSRKFQPGSRSDEL\*

#### >Lec-tarl4e

MAVWLATSSVHLHSSIA YDRYVAICQPLRHAERASRGRTAVMPLGRWFVVMHNNAPIVMGLMPPDIE  
DAVASASCPDKCVVHMNANFGVSDALYCFVATMSVMGVARRRARSVHGAATSKSCGPKASGGTITVQ  
WASLKREHNATKTLAIYIFWLPYFVSVGTVEPFKDFTMNANTWELVWVPSYTNSTINPLLYA

#### >Lec-tarl5a

MNSTLIKCIITYYNLNCCTPHLSYTHGLAVQGVLLFFIISTILGNMLVIASIMYFKQLQSHTNSLTL  
SLAAADLLVGLVMPFMSMRTVHSCWFYFALFCKLHCSLDYIFSTVSIHLHSCVAFDRYIAICDPLH  
YTSRVNTNTVAFMLIICWTCPLVYFAPFLLGWNIIGIEEMVQSRICADTCAIVKNVWFAYVDTCCAF  
ITPMAIMITTYAKIYRVARRQARQVSAASVALQLNGHERQHQWALMKREHNATKTLGIIMGGFLFFW  
LPNFVASLIDPVNDFQTDPLVWNIIVVWLGYNSTINPLLYASFNRPFKAFKIMFSLEITHLSTRNK  
DLD\*

#### >Lec-tarl5b

MAQSVLKLNSTNLTNVSSNRCVLNAFQLLCPLDLSYASSVLVQTALVICIVAVGNTLVIVSIA Y  
FRKLQSRMNVFTLSLALDFLVGVLIMPFMSMLKTVHNCCWFFARWFCKIHTSLDYVICTVSIHISC  
IAYDRYNAICHPLCYTQRVNRKVVVVLGGCWVAPVIYVAPIMLGWNIIGIEQIVASMTCPDSCVMF  
KNIPFMVMDTVCAVILPMLMGVAYAKIYRVVRDHSRRIHSQHQQQVDGNALKREHNATKTLGLIMG  
AFCVCWLPYCVNVVDVFNNYQTSRWVWSVVTWLGYNINSGFNPVLYALFSRPFRAFAIVFSKRIFT  
SDTRNMDLDFRED\*

#### >Lec-tarl5c

MAQSTMEPNFTNIANLNTNTSSGSCVLNAFQLMCPPEMSYASSVIVQTALVICIVAVGNTLVIAS  
IAYFRELQSRMNVFTLSLALADFLVGVLMIMPFMSMLKTVHNCWFFGRWFCKIHTSLDYIFSTASIVHI  
SCIA YDRYNAICHPLCYTQRVNRVKKVVVVLGGCWVAPVIYVAPIMLGWNIIGIEEIVASMTCPDSCV  
MFKNTTFVILDVCAFMVPM SIMGVAYGKIYKVARQSRRVHSQHQQQVDGNALKREHNATKTLGLI  
MGAFFLCWLLYIVVSLVDVVFHFQTSGEVWSVVVWLGYNINSGFNPVLYALFNRPFRFAFAIIISKRI  
FTSDKRNDLSRED\*

#### >Lec-tarl5d

ATSVALQVLFVLFMAGTVVGNALVIAAVSLFGHLRTRTNAFTLSLAAVDALIALVMPFSSSTRTVRG  
GCWAYGGLFCKLHHDYSLCTSSIVHLSCIAFDRYTAICHPLRYQALVNRRSVAAMLAFALWGPTF  
YVVPFLLHWNTVGIAMVARTCPGDCVLYKNVGFVFLDTTCAFFVPMGVMIVAYAKIYRVARRQAR  
QIHASRAQVTVRGWVSG\*

>Lec-tarl6a

MENGTVGPYDHCIDSFYHLNCSTPTLSVPERTVALSAITTLILATILGNLLIITSIAEFRQLQTRTN  
IMALSLAVADLLVGLTVMPYSMMKAVYKCFYQFFCNLQFFLDYTLTNSSI IHLGCIAYDRYVAIC  
DPLRYSQRVTNHTVVIMLLISWFAPALFSSPILVNFNPEWSRDIIEIISCPNQCLFFVSTWLVSVVG  
VCPYVLSLLTMSYVYARIYVVARRQGHQISSVSLQVHAQQQQQQQVEHTNFRQKSTAMKREHSAKT  
LGSIIIGFYLLSWLFFYMVVLFPPNFKNSSAAVRITTWIGYISSAINPVLYASLNRPFERSAFVAVISC  
KVLSSSRARTMDLSGVK\*

>Lec-tarl6b

MENRTVGPYDHCIDSFYHLNCSSPTFSMSERTAALSAITTLILATV LGNLLIITSIAEFRQLQTRTN  
IMALSLAVADLLVGLTVMPYSMMKAVYKCFYQFFCNLQYFLDYMLTNSSIMHLGCIAYDRYVAIC  
DPLRYSQRVTNHTVVTMLLISWFGPALFSSPILVNFNPEWSRGIIEIISCPNQCLFFVSTWLVSVVG  
VCPYVLSLLTMSYVYARIYVVARRQGRQISSVSLQVHAQQQQQQQQAEP TNRQKWAAMKREHSA  
KTLGSIIGVYLLSWLFFYMVVLFPPNFQNSSAAVRITTWIGYISSAINPVLYATLNRPFERSAFVAVI  
SCKVLSSTRARTMDLSGVK\*

>Lec-tarl6c

MCKKNATGETKAAGRAGAPPTPSCAFSEPQRGDLFLVLSVVNLHVSLHRSSRSKAMPNTTTTITARQ  
CIDFHGYNCTGPSLPEHSRPVVLVLISIFITATILSNLLIISVVAFFRQLQTHTNILALSLAVSDFG  
IGALVMPLRMVGTVYNCWYYDY SFCNVFYFVDYTL CNSSIFHLSCIA YDRYVAICDPLRYTQRVTDR  
TLVAMLLISWLGAALFTSPSLLSFSPQLAPSSIEREGCPDDCLFNVDVALHFFYGASPYFITMLVIM  
AVYARIYHVARRQARQIAASSSTKVQOSGGDGNEQQRVSNMRR EHNATVTLGSI IAVFFLSWLPFFI  
IVLVFPFVGNFDVEYEVATWMGYISSAVNPLLYASFNRQFRGAFRKILSLTMFRAGARNAKLSE\*

>Lec-tarl6d

MANTTKTLQCIDYHGYNCSGPSLPEKSRPIILIIISFFIVVTILSNMLIISSVIIFRQLQTHTNILA  
MSLAVSDFGLGSIVMPLRMGTVYNCWYYDY SFCNLLYFVDYTL CNSSIFHLSCIA YDRYVAICDPL  
RYAQRVTKRTL VAMLLICWFGAALFTSPSLLSFSPQLAPSSIERVGC PDDCLFNVDIALHFFYGAFP  
YFLTMLVITAMYARIYHVARTQARQIKAATTKVQSQGLQVRVNMRR EHNATVTLGSI IVSFFLSWMP  
FFIIVLVFPFVGNCDVEYEVATWMGYISSAVNPLLYASFNRQFRGAFRKILSLRIFRAGERNFKLSE  
\*

>Lec-tarl6e

MANTTKTLQCIDYHGYNCSGPSLPEKSRPIILIIISFLIVVTIFSNMLIISSVIIFRQLQTHTNILA  
MSLAVSDFGLGSIVMPLRMVGTVYHCWYYDY SFCNVLYFVDYTL CNSSIFHLSCIA YDRYVAICDPL  
RYAQRVTKRTL VAMLLICWFGAALFTSPSLLSFSPQLVPSAIKRVGCPDDCLFSVDVSLHFFYGACP  
YFLTMLVITAMYARIYHVARTQARQIKAATTKVQSQGLQVRVNMRR EHNATVTLGSI IVAFFLSWMP  
FFIIVLVFPFVGNCDVEYEVATWMGYVSSAVNPLLYASFNRQFRGAFRKILSLRIFRAGERNFQLSE  
\*

>Lec-tarl6f

VLYFVDYTLCTSSIFHLSCIAFDRYVAICDPLRYAQRITKRTL VAMLLICWFGAALFTSPSLLSFSP  
QLVPSAIKRVGCPDDCLFSVDVTLHFFYGACPYFLTMLVITAVYAHYHVARTQARQIKAATTKVQS

QGQQRVSNMRREHNATVTLGSIIGAFFLSWLPFYIIVLVFPFVGNCDVEYEVATWMGYISSAINPLL  
YASFNRQFRGAFRKILSLRIFRAGERNFKLSE\*

#### >Lec-tarl6g

MANTTKTLQCIDYHGYNCSGTSLEKSRPIILIIISFFIVVTILSNMLIISSVIIIFRQLQTHTNILA  
MSLAVSDFGLGSIVMPLRMVGTVYNCWFYDYSFCNVLYFVDYTLCTSSIFHLSCIAFDYVAICDPL  
RYAQRITKRTLAVMLLICWFGAALFTSPSLLSFSPQLIPSAIKRVGCPDDCLFSVDITLHFFYGACP  
YFLTMLVITAMYARIYHVARTQARQIKAATTKVQSOGQQRVSNIRREHNATVTLGSIIGAFFLSWLP  
FYIIVLVFPFVGNCDVEYEVATWMGYISSAVNPLLYASFNRQFRGAFRKILSLRIFRAGERNFKLSE  
\*

#### >Lec-tarl6h

MDNSTTGSPCSLHYKYNCTGPSLSEEDRIFTLAIIIFFIATILGNLLIIVAIACFRQLQTHANTL  
ALSLAVSDFLIGLLIMPYRMMHAVYQCWFYASFFCHLHYFLDYTLTTSSIIHLSCIAFDYVAICDP  
LRYPTRVTDRTVAVMLLALCWLGAAIFFTPALLSLSPTLSRGTIERGGCPDNCFIVNLGLHFAYGMC  
PYFLSMFIILLIYSKIYRVARRQARKVIAGAPTESQRTEVANGGSSGGGGGGDEAAKRWKSRMKREH  
NAAKTLGSI IACFMLS WLPYDILVIVFPFYKNTSVAYEVV CWIGYISSTVNPILYASINRPFRTAFG  
RILRLDFFSAEVRHLELSNH\*

#### >Lec-tarl6i

MDNSTTVSPCSLHYEYNYCTGPSLSEEDRIFTLAIIIFFIATILGNLLIIVAIACFRQLQTHANTL  
ALSLAVSDFLIGLLIMPFSMMHAIYQCWFYASFFCHLHYFLDYTLTTSSIIHLGCIAYDRYVAICDP  
LRYPTRVTDRTVAVMLLALCWLGAAIFFTPALLSLSPTLSRGTIERGGCPDSCMFTVDLGLHFAYGMC  
PYFLSMFIILLIYAKIYRVARRQARRVTAGVPIHAQRVEVANGGSSGGGHDGDEAAKRWKSTMKREH  
NAAKTLGSIIGCFMLS WLPYIILVIVFPFYKNTSTAYEVV SWIGYISSTVNPILYASINRPFRTAFG  
RILRLDFFSAEARHLELSNH\*

#### >Lec-tarl6j

MDNSTTGSPCSLHYEYNYCTGPSLSEEDRILALAIIFFIATILSNLLIIVAIIGFFRQLQTYANIL  
ALSLAVSDFLIGLLIMPFSMMHAYECWFYASFFCHLHYFLDYTLTTSSIIHLGCIAYDRYVAICDP  
LRYRTRVTRNTVAVMLVLCWIGAAI LTTPTLLSLSPTLSRGTIERGGCPDSCMFTVDVGLHFAYGIC  
PYFLSMFIILLIYAKIYRVARRQARRVTAGMPIHAQTVEVANGGSSGGSDGDELARRWKSTMKREHN  
AAKTLGSI IACFMLS WLPYDIMVMVFPFYKNTSAVYEVMSWIGYISSTINPILYASINRPFRTAFGR  
ILYLDVFS DARHLELFEH\*

#### >Lec-tarl6k

MYNNTDNRC AELYHGYNCTGPSLTPTNLCAVVILLSSFIVATVLGNLLIICSI AFFKQLQTFSTTLA  
FSLALSDFLVGLVIMPFAVMKTAYRCWFCAGAF CNAHHFLDYMTNSSIFHITCIAFERVVAISDPL  
RYGARVTRKTM AAMLLL CWLGSALFSSPSLVSLLSKAVSGGLIQRVRC PDDCVFSVYIGIQAVIGIS  
PYFISLVVIVLVYGRIYSIARRQAQKVNSEGSRRRGQEAAASTDTLHKWRAMRREHNATKTLGVIIIF  
FFLLSWLPYNVTVIVFEFVAYASDVYQVTLWIGYISSAFNPILYACFNRPRTAFHRILRLKVF TLA  
ERDFALSTVQDGGH\*



>Lec-tarl6l

MNHTSAPSARNACVTFRSFNCTGPSLPENYRALLLAILAFFTLATILGNLLIISSIAFFRQLQSFNP  
VLALSLAISDFLVGLVIMPLAVTKVIYNCWFYARLYCNVHYFLDFAFNTCSILHLCSIALNRYVAIS  
DPLRYESRVTRRTLVMMLVTCWLGSASVSSPILLSLSPTLSVGTIERISCPNDCVFDINIGIMVIG  
YCPYFASLVVIVCIYGKIYRIARAQVIKIRAQQGGGGGGSHRTDNDNAEALVKLRMTMKREHSATKT  
LGVIIGFFLISWLPYYVIVLASLALTDTLFAYRVALWIGYISSAFNPILYAAFNRPFRAFRLMFRL  
KVFGEgardtdlsgRLK\*

>Lec-tarl6m

MANLTDTHASPGCIHYLDAFNCTGPTMSLPALSASLAIISFFVVATVLGNLLIMSTIAFFKQLQTST  
NVLALSLAVTDFLIGLIIMPAMTKEMFNCWFYGDVFCNVHFFVDYMLTNCMSMLHLGSIALQRYVAV  
SDPMHYATRMTSRSLAAIGFCWLGSAVFSSPILLSLSPALSEQTVARKSCADNCLFYVHMGIMFVV  
GYCPYFASLLVIVCVYAKIYRIARNQMRKIRSVACKVEETTRQVIKREHNATKTLGVIIFFFLLSWL  
PYYLIVLSSMAVKNMTMSAYRVALWAGYISSAFNPILYAFNLHFRNAFKMMLGCKIFAPGARHTDLN  
FLNKATNDRN\*

>Lec-tarl6n

MDNSSLASSPSCVISFSNLNCTPTSLKSKHRAVAVFTISLFIVITILSNLLIIVSAVALFRQLQTOA  
NALALSLAVSDLLVGVVIMPLSLTKSVYKCFYAPLLCHVHFFCDYWFTTASVLHLSCIAYDRYVAI  
CDPLRYQQRMNRRALVMMLFCWLCSALLSTPILLSLSPTLSQGTIAKNGCPDDCRFFISVGILFAI  
GMWPYFTSVLLVLMYGRIYRVARGQARKIAAMDRASSGLGGGDEAGRAAASRWASMKREHSAAKTL  
GAILAAFIISWLPYYIIAIMLTVDESVILPYKVS VWLGYMNSAINPILYAAFNTQFRRAFKAILT FN  
TYPSPRAADDEMSSTKN\*

>Lec-tarl6o

MENTTSTSTSKCVISYYGLNCTKMDFSSESALIVGVMSFFIGTTILSNLLIISAVAFFRQLQTRTN  
TLALSLAVSDLLVGVVIMPLAMIKAIYKCFYVQWFCNVQFFCDYWFTTASVLHLSCIAYDRYVAIC  
DPLRYAQRVTRRTLTFMMLFCWIVSAIISTPILLSMSPTLAKGRIEMVGCNDCRFLISVGILFTIG  
MVPYFTSVLLIMLMYGRIYQVARSQARKIGTQSHGLPGVASETTSRWTNMKREHNATKTLGSIIAAF  
IISWLPFYILAIIVFTMYQDIFLPYKISFWIGYMNSTINPILYAVFNKQFRHAFKTMLSFKVFSSAAR  
DKEMN\*

>Lec-tarl6p

MAENSSSSSSNSNGAEGLESECVVSYYGLNCTKMNFSEKSESALIVGIMSFFIAVTILSNLLIISAVAF  
FRQLQTRANALALSLAFSDLLVGVVIMPLAMVKSVMYKCFYARWLCNVQFFWDYWFTTASVLHMSCI  
AYDRYVAICDPLRYQQRVTRRTLTFMLFFCWIASALLSTPILLSMSPTLSKGRIETVGC PDDCSFLI  
SVGILFAIGMWPYFMSVLLIVLMYGRIYRVARGQARKIAAMDRASSVLGGGEEAGRAAASRWASMKR  
EHNATKTLGAIIVAFIISWLPFYINAVIFTMDES VLLAVWIGYMNAINPILYATFNKQFRHAFKEI  
LSLNVFLSPADRNKEMQ\*

>Lec-tarl6q

MAENSSSSSSNSNGAEGLESECVVSYYGLNCTEMNFSEKSESALIVGIMSFFIAVTILSNLLIISAVAF  
FRQLQTRANALALSLAFSDLLVGVVIMPLAMVKSVMYKCFYARWLCNVQFFWDYWFTTASVLHLSCI  
AYDRYVAICDPLRYQQRMNRRALVMMLFCWIASALLSTPILLSMSPTLSKGRIETVGC PDDCRFLI  
SVGILFAIGMWPYFTSVLLIVLMYGRIYRVARGQARKIAAMDRASSGLGGGEEAGRAAASRWASMKR

EHNATKTLGAI IAAFI IISWLPFY IIAVIF TMDES VLLAYKVAVWIGYMNSAINPILYATFNKQFRHA  
FKEILSLNVFLSPADR NKEMQ\*

>Lec-tarl6r

MQNTSVPQVHKECVIFADFNCTGPTQVREVRLLVLLVVF AIFITATILGNLLIITAIASFTKLQTHAN  
FLALSLAVSDLLVGVFIMPLSMMKTVYDCWFYASVLCNAHYFLDYTLTTATILHITCIA YDRYVAIC  
DPLRYPTRVTVRTIAGLLVLCWLGAAIFSSPILLSFSPTLSRGNIERASCPDDCVFSVSVFGILVTIG  
MGPFYTAIHVVLLMYAVIYRVARRQSRKVAEEAASSAADSSAVKNMKREHSAAKTLGAIIGTFMLS  
WLPYYVAMMSFTVDGLFIPYRVAMWIGYCSSAINPLLYASFNRPFRTAFRDI FRLRVFSGVVRDS  
GLSERSHGQPMAR\*

>Lec-tarl6s

MPNDSDDAASSTCVS FNHLNCTGPSLPPLSRHLV LALLLIFIAATILGNLLI IAAIASFRQLQTRAN  
ALALSLAVSDLLVGVLCMPSS TLKTIYNCWFFPDVLCWHWHFFADYMFTTASVLHVTCIAFD RYVAIT  
DPLRYAARVTPRTL VAMLVFCWLG SALVSSPILLSLSNGDALSGPTIHRILCPND CFFYISIGIMLV  
IGMGPFYFASMLVVVAVYARIYAVARGQARKIAASASGSQMRGHADESANSASVKSMKREHNATKTLG  
AII CSFLLSWLPFYIITII SMFVNDMFLSYRITLWLGYISSIVNPF LYALLNRQFRAAFRTLLSVKV  
FSVLGSRGADLMGVKKS\*

>Lec-tarl6t

MANSSCTISFYDLNCTGPSLSVRDRAIVLTLVALVNATTVAGNLLLIATVSFFRRLRSWPNVMALS L  
AVSDLLVGTLMPLATVKAVYSCWFYADLLCHWHFFLDFALTTCSILHVACIAYDRYVAVCDPLRYA  
ARV TERTV GAMLALCWLGSALVSAPILFSLSPALSPNTIHRILCPDDCFFYVHGLIIFVIQMGPYIV  
SVAFFVALYGOIYRAARLQARRIGGVGGGGKSSSAEATAAARSEHKATKQLGIIIGCFLLSCLPFYL  
VDVSVLVDEALFVPPRITVLSGYISSALNPLLFAKFNRQLRAGFAMV LRAQLFRPGARDTDFSGGGR  
RGE\*

>Lec-tarl6u

MTYSSLNNTTGHCVELFENQICSKPKLSYEDRIVAVIAVLSFFISATIFGNCLIIITAI AFRQLQTNT  
NALALSLAVSDLLVGAIIMPFSVNRSVYQCWFHGRVFCVHFFLDYAICNASILCLGCI AFDRHVAI  
CDPLRYAQRVTRGTLASMI VLIWGAALLSAPILLSLSETWAKGIEITGCLDGCHFAVHVILTLVV  
GILPYFIIMLLMLLVYGR IYGVARRQSRQINNSSGSRASDADSRSKWAAMRREHNATLTLGMIVGFY  
LVSWLPYFTASVLEMAFGIST SALVWATVTFWFGYANSV VNPVLYATFNRPFRTAFRIIFSSELFAPG  
ARRTDLHGLKVAGG\*

>Lec-tarl6v

MTYTSSNNTTGHCVESFENLICS KPKLSDED RIVAMAVLSFLISATIFGNCLIIITTAIFRQLQTNT  
NALALSLAVSDLLVGAI VMPFSALRSVHQWLGHI FCRVHYLDYTFCNASILCLGCI AFDRHVAI  
CDPLRYTQRVTRGTLAFMLALI WAGAALLSAPTLVSLDETWARGLMEIAGCPDGCHFAMHVGLTLVV  
GILPYFIIMLLMLLVYGR IYGVARRQSRQINNSSGSRASDADSRSKWVAMRREHNATLTLGMIVGFY  
LVSWLPYFTASVLEMAFGVTASALVWSTVMWFGYANSV VNPILYATFNRPFRTAFRIIFSSELFAPG  
ARDADLYGLKVTGG\*

### >Lec-tarl6w

MMEANSTLGECAAPFLQFNCTGPGLEPTDQALVLSILILFIAATIIGNLLIACAVLRFRLQTRTNA  
VTTSLAVADLLVGAVIIPCSMTHEVYRCWFFGQIFCRIHYFMDYWFTNASILHLGCIADFDRYVAICD  
PLRYQQRVTNRTVALMLLMCWLCSALFSAPILVSLSDVLSNGVMDRTSCPDECVFIVNLGLTFVIGI  
CPYFLSFIILSLAYAKIFRVARAQASQIHAAGKHGADSSSSASIVGDANSKRITLWAMKREHNATKTL  
GMIIGFFLLSWLPFYIISVVDVIIDYQTNVLRRTVTWVGYFSSAVNPVLYASFNRPFRTAFRDLVS  
CRAFAVGARNKDLFGS\*

### >Lec-tarl6x

MPKTNSTLGKCAAPFLQLNCTGPGLEPTDQAFVLSILILLIVATIIGNLLVACAVLRFRELQTRTNA  
VTISLAVADLMVGAVIIPCSMTHEIYRCWFFGQTFCRIHYFMDYWFTNASILHLGCIADFDRYVAICD  
PLRYQQRVTNRTVALMLLMCWLCSALFSAPILVSLSDVLSRGVIERTSCPDECVFIVNFGLMFMIGI  
CPYFLSLIILSLAYAKIFRVARAQASQIHAAGKHGADSSSSASIVGDANSKRITLWAMKREHNATKTL  
GMIIGFFLLSWLPFYIISVMDVIIDYQTDVAVMWGTVTWVGYFSSAVNPILYASFNRPFRTAFRDLVS  
CRAFTCRRGT\*

### >Lec-tarl7a

MFWLHLRSTMDNQSDVEAPGLLCVNSYNNLSCSSPRLPATQRTLALVVLI SFSACTVVGNSLIVLSI  
LYFRQLQTRTNAFTLSLALADMLVGLLVMPYSMMRAVYSCWFYGSFFCKVHTWFDFTFTSSSVIHLS  
CISIDRYIAISDPLRYPKRLGPPK**VALMLVVCWSTTLAYGLPFFSGWTVLGIIEVIARGSCRDACPV**  
**VGNMAFAFTNAFFAYLIPLCIMVTSYAKIFRIAREQAHKIRANSAHDPGVESSSSSARQQWAAMKRE**  
**HNATKTLGIMGVFLLFWLPYCSVAVIDPIIGYQTSATSWDVANWIAVNSAINPVLFAFNRSFRG**  
**AFRLIFTCRVSSSTYRNADLFNLNDSAN\***

### >Lec-tarl7b

MSPPPDVPTLLSPRNQTTDANRSATTA AAAASMSPSERLVALSVMTTLIACTVAGNLLVVAFIAYFRH  
LQTRTNAFALSLALADFLVGLLIMPYSTMRSVDGCVWPGVFCRVHTWLD FSLTSSVHLCCISYD  
RYVAVADPLRYPQVRTRRAVALLLCCWLSVPVYSWPVMSGWYSVGVDPDGPAGAFAGCREVCPVSVSA  
TFGLANMLCAYAAPMLLMSLT YAKIYRLARAQARKIDAATAGLRRRGPADGAADGADGDGRRWKAAM  
RREHNATKTLGVIAGVFVLCWVPYFVLSATDSDLDDATRRAAADISNWLTYVNSTLNPVLIVALNRS  
FRNAFRATVACRVFAPGFRATDLFNYDDSER\*

### >Lec-tarl7c

MNPLPSFQLSPSPPLLQLLLSTPTSSSSPPPPTPNSNHCVP SLYGLSCTPSDLSQTGRALLLTILF  
LAILITLAGNLLIIASIAFFRQLQTRSNVLVASLAAADLLVGS LIMPFSAMRTADNCWPYGDLCRL  
HTWLD FSATCSSIINLACISAERYISVSDPLRYRQRVTPRVLIAMLTLSW SGLAVYGATFLAGWNVA  
GMEGVIAAESC PHSCRVMNAATTFANVGAYVAPMLVMAAANVKTYGVAR DQARKVHASGPLDAHGR  
SRWEAMKREHNATKTMGIIMGVFILLWLPYILLASTE PMLGYGTT PATWEAVNWL PYINSTVNPVLL  
ASFNRSFNGAFRVILGGKATRPGARGTDLYNLRDRVG\*

### >Lec-tarl7d

MPFSAARTAYNCWFYGDLCRLHTWLD FSTCTSSIANLACISLERYASIAEPLRYRQMVTPRVLAAM  
LLLSWSGLPLYGATFMLGWNLVGIKRQVAESSCRHDCRVYMN PASTATNVLVAYVMPMLLMIVANAK  
IHLARAQARRIEGSAMVSGRDDRASKREHNATRTLGIITGAFILLWMPYFILVASEPLLGYGTSR  
AAWEVVCWLPYLSAVNPVLLMVFNRSFNGAFRLALKGRVLKSGCRGIDLNFNRDGNM\*

>Lec-tarl7e

MNESGSNDSSRRCVWTFHQFSCTSSDLSAAERATLLAILLSISAITVAGNLLTITSILYFRQLQTRT  
NVLTLSLAVADLLVGLLIMPFSAMRSVHNCWFYGRVFCRVHTWLDYTFCTSSIVHLSCISFDRYVAI  
SDPLRYGDRITHAALAAMLALSWSIFPIDGLVFMQLQWNLVGMEEETRRCSPDDCKVILNLPYAVANT  
ACAFVLPMLLMALAYGRIYRLARVQSRKINSLGAQVQKMSGDAECLSKWNAMKRDHNATITLGI IIG  
MFI AIWMPYFVVSATEPMVGYQAGPVAWEVINWFTYLNSTVNPILFAAFNRSFRWAFRLLVTCSAFR  
PGIRSADLNFNKEGPA\*

>Lec-tarl7f

MSSHANTTSPACGLTFYFNCSRASVTSSSERAQMMSLLLSISAITVAGNLLTITSILYFRQLQTRT  
NALTSLAVADLLVGLLIMPFSVMRSVHNCWFYGRVFCRVHTWLDYTFCTSSIVHLSCISFDRYVAI  
SDPLRYEQRVTRRACARMLVCSWLCLLVYGLAFMLEWNLVGLEEEVAHVCPDDCPVLLNLPFAMANT  
IFACVVPMLMMLTAYGRIYQLARQQARKITSAAMGSNADSARSSLRREHSATITMGI IVGVFISLWI  
PYFVVSVTEPIFGYQAGSVTWEVINWFTYINSTANPILFAAFNRPFRNAFYLLILSGRMFASSCRGVD  
LFDVPRALAKARG\*

>Lec-tarl7g

METLNESIRNSSLLCVEVFHNFHCTSNDISEAERATLITIIIPAIAITIFGNLLTVVVSILYFRQLQT  
RTNVLTFLAVADLLVGLLIMPFSAMRSVYNCWFYGWTFCKMHSWFDYTLCTLSVLLLSICISFDRYV  
AISDPLRYHQRI TNRTCALMLLFCWLCLPFYGVVFMMEWNLVGLEEEVAQICPDDCPVLLNLPFAMA  
NTIFGCVVPMLMMLTAYGRIYQLARQQARKIASTAMGSNADSARSSLRREHSATITMGI IVGVFISL  
WMPYFVVSSTESIFGYQASSLAWEFINWFTYINSTVNPILFAAFNRPFRNAFYLLILSGRIFSSSYRG  
VDL FNVQQGSKVNQGA KR CVSTLIGKKS DR\*

>Lec-tarl7h

MLQETVQKVVT CNVSFYNLNCTLSELTQPQRVALICVFTIIITITVVGNIILTIVSILYFRQLQTRTN  
VLALS LALADFLVGCLIMPFSVMRTAYSCWFYQQLMCR IHTWLDYTFCTSI FNLACISIDRYVAIS  
DPLRYDQRVTYRILAVMLTICWSNIIPYGVSYMLKLNINGIESVVAAKSCPDNICYVMNVPFGLANS  
MGAYVLPMLFIMAAYSRIYVMARNQAKRISSLGDQVRASNASDLTMQSKWNAMKRDHNATKTLGMIM  
VVLFI VWL PFI VV VAMEPVI GYRMDSTVWDVANWFTYFNSTMNPILFASFNNSFRNAFYLLIMSGKIL  
RGSYRGTDL FNFRRLEK\*

>Lec-tarl7i

MKTHNATNTSVAPVCVVTFFNFNCSPDDLGDGERDILIGGFSLVIATTALGNILTITSILYFRQLQT  
RTNAFAISLATADLLVGMVMPYAVTRTAYTCWFYGKTFCKMHTWFDYTLTSSILHLACISIDRYV  
AISDPLRYEQRVTKKLVGRMLVFCWTSFIIYGLSYMLEWNIAGIEDIVASSTCPHNCPVFMNVQFAL  
TNTLCAYVTPMLLMLAAYAKVYVMARAQARKISIAMLQTRSADA AVRSRWSAMKREHSATKTLGIIM  
GAFVIFWVPPFFVAASEPLLGYASDPLVWDVANWFTYINSTMNPILFAAFNRSFRNAFYLLIVSGKIL  
RGSYRGTDLFSFKRGGGVAEMA\*

>Lec-tarl7j

MSLHNESFPSVLCVVT FAFNCTPSPMTHVERALLMGFTI AVAMTITGNMLTISSILYFRQLQTRT  
NVLALS LALADLLVGLLVMPFASTRTAYGCWFYGRTFCKVHTWFDYTLCTSSILNLMCISLERYVAI  
CDPLRYARRVTGATLAAMLVLCWSGVVAYGLTYLLEWNI TGI EDSVQRTT CPDNCPVFMNVQFALTN

TLCAYVTPMLLMLAAYAKVYAMARAQARKISIAMLQTRSADAAVRSRWSAMKREHSATKTLGIIMGA  
FVIFWVPPFFVVAASEPLLGYASDPLVWEVANWFTYINSTMNPILFAAFNRSFRNAFYLVSGNILRG  
SYRGTDLFSFNDLVK\*

## **Lampetra fluviatilis**

### >Laf-tarl4a

VMPFYMTQCVDYDCWFYSHAFCKVHHFLDAFISTASTMHLCCIAVDRYLAICDPMHYRERFTWKTAAL  
LLAAAWLGSLLYVVPVMLGWIVIGIEDMMESRTCPDNCVFMNKVFS SSCGAFFSFVVPMTIMTLAYA  
KIYRVARKQARSISVQQQGGQKSGFNKQQAAMKREHNATKTVSIIILGVFMFCWAPFFSTIVNDPW  
IDFKTNSIFWDIVNWFVGHVNSAINPYLYGGFNRTFRNAIRIMFSRKFWQPGSRSDEL

### >Laf-tarl6a

MANRTVGPYDHCIDSFYHLNCCSPTFSMSERTAALSAITTLILATVVLGNLLIITSIAYFRQLQTRTN  
IMALSLAVADLLVGLTVMPYSMMKAVYKCFYGGFFCNLQYFLDYMLTNSSIMHLGCIAYDRYVAIC  
DPLRYPQVRVTNHTVVTMLLISWFGPALFSSPILVNFNPEWVRGNIEIISCPNQCLFFVSTWLVSVVG  
VCPYVLSLLTMSYVYARIYIVARRQGRQISSVSLQVHAQQQQQQQAEPNIRQKWTAMKREHSAK  
TLGSIIGVYLLSWLPFYMVVLFFPNFQNSSAAVRITTWIGYISSAINPVLYATLNRPFSAFVAVIS  
CKVLSSTRARTMDLSGVK

### >Laf-tarl6b

FFCYLHYFLDYTLTTSSIIHLGCIAYDRYVAICDPLRYPTRVTDRTVAVMLALCWLGAEIFTTPTLL  
SLSPTLSRGTIERGGCPDSCMFTVDLGLHFAYGMCYPFLSMFIILLIYAKIYRVARKQARRVTVGVP  
IHAQRVEVANGGSSGGGHDGDEAAKRWKSTMKREHNAAKTLGSIIGCFMLSWLPYYILVIVFPFYKN  
TSTAYEVVSWIGYISSTVNPILYASINRPFRTAFGRILRLDFFSAEARHLELSNH

### >Laf-tarl6c

ICDPLRTAQIRITKRTFVAMLFICWFGAAFFTSPLLSPQLVPSAIKRVGCPDDCIFSVDVTLHFF  
YGACPYFLTMLVITAMYARIYHVARTQARQIKAATTKVQSQQQQRVSNMRREHNATVTLGSIIGAFF  
LSWLPFYIIVLVFPFVADCDVEYEVATWMGYISSAV

### >Laf-tarl6d

ISDPLRYESRVTRRTLVMMLVTCWLGSASVSSPILLSLSPTLSVGTIERISCPNDCVFDINIGIMVV  
IGYCPYFVSLVIVCIYGKIYRIARAQVIKIRAQQGGGGGGGHRTDNDNAEALVKLRTMKREHSAT  
KTLGVIIGFFLISWLPYCVIVLASLALDITLLAYRVALWIGYISSAF

### >Laf-tarl6e

MQNTSVPQVHKECVIFADFNCTGPTQVREVRLLVIVFAFFITATILGNLLIITAIASF TKLQTHAN  
FLALS LAVSDLLVGVFIMPLSMMKTVDYDCWFYASVLCNAHYFLDYTLTTATILHITCIAVDYVAIC  
DPLRYATRVTVRTIAALLVLCWLGAEIFSSPILLSFSPTLSRGNIERASCPDDCVFSVSFGILVTIG  
MGPYFTA IHVVLLMYAVIYRVARRQSRKVAADSSAVKNMKREHSAKTLGAIIGTFMLSWLPYVVA  
MMSFTVDGLFIPYRVAMWIGYCSSAINPLLYASFNRPFRTAFRDIFRLRVFSGVVRDRDGLSERSHG  
KAMAR

>Laf-tarl6f

ICDPLRYAQRVTRRTLTFMLLFCWIVSAIISTPILLSMSPTLAKGRIEMVGC PNDCRFLISVGILFT  
IGMVPYFTSVLLIMLMYGRIYQVAR SQARKIGTQSHGLPGVASETTSRWTNMKREHSATKTLGSI IA  
AFIISWLPFYILAIVFTMYQDIFLPYKISFWIGYMNSTI

>Laf-tarl6g

ICDPLRYAQRVTRGTLASMI VVIWVGAALLSAPILLSLSETWAKGIIIEITGCPDGCHF AVHVILT LV  
VGILPYFIIMLLMLLVYGR IYGVARRQSRQINNSSGSRASDADSR SKWAAMRREHSATLTLGMIVGF  
FLVSWLPYFTASVLEMAFGISTSAFVWATETWFGYANSV

>Laf-tarl7a

MLQETVQKVVT CNVSFY NFKCTLSELTQPQRVVLIVVFTIIITITV VGNILTIVSILYFRQLQTRTN  
VLALSLALADFLV GCLIMPFSVMRTAYSCWFYQQLMCRIHTWLDYTF TTCSI FNLACISIDRYVAIS  
DPLRYDQRVTYRILAVML TICWGNII PYGVS YMLKLNINGIESVVA AKSCP DNCSVFMNVPFGLANS  
MGAYVLPMLFIMAAYSRIYVMARNQAKRISSLGDQVRASNASDLTMQSKWNAMKRDHNATKTLGMIM  
VVLFI VWLPFIVV VATEPVIGYRMDSTVWDVANWFTYFN SRMNPILFASFNNSFRSAFY LIMSGKIL  
RGSYRGTDLDFNFRLEK

***Petromyzon marinus***

>Pm-tarl1a

MDPSSSSVAAPSSPASSNSSWAAPPPLPHCALVQGSFSCPGSALSSAQRAAWLAMMSVAMASAVLGN  
LLVVASVLHFRRLQTRTNAFTASLAVVDLLVGLLVMPFKMTRSAYGCWFYGTAFCAAHTCLDIALCT  
ASILHLACIAFDRHVAVCDPLRYAQRVTARHVAAMVALSWCCGAVISVVTVSLGWNVVGVPDEVVAA  
SCADSCDFLLGAPYAVGSSVCSFFGPAAFVVVAYARILREARRQGRAIACEQWRHQEQEKQQQONE  
DQQQGRQEDGVGEGGRGGARGEMTGNGGVGKRYEIGGGRAEGLGTVGKIGSVLEGGRLTTAPAGKA  
TQAVGRAADAKSER NATKMLSIVVGI FLASWLPFFLMNVSDPLL GYSIDPRAWEAVTWLGYANSAAN  
PVIYGIFSPNFRAAFRVIAARSAFRAGSRDVQLGF\*

>Pm-tarl2a

QVTFRAMALLTATWNATSPNDVLARYYGRTFCKAHTCLEYVFTTASILHLGAI AFDRHTAICDPLRY  
RQRITPRRVAHLLAASWLLPFLYVPPVSLGWNVVGVEAAARLSCPDSCVVLKNVGFALVDTCCAFF  
APTALMLVAYAKIYRVARRQARQIAASSTGTASVVTASVKQQQQQONHLQEQQNEQQATFRRTMKR  
EHSATKTLAIILGAFVWCWPYFVASAVDPFVGFSTEPALLSATLWLCYANSALNPVLYAAFNRRFR  
AAFSRIFCRGKGNAAVVMVAAAWRDRRRRPRPPPPASPEEESDS\*

>Pm-tarl2b

\*RSLCESMALCVTLYESMALHVSMSLWTC SAKPPSLSLSRRYTARVTPGAVAAMLVACWLGPLLYVA  
PIMLGLQSVGAEASLALACPD DCPFVMSATFSLAATSCSFVAPMIIMLAAYARIYRVARRHARS IAS  
RPPAPPGGGDGAKGMAAASSS!  
SAPRRWRQEYNATKTLGVILGAFFALWLPFFSAAVADGLPGGPRVDGTTWHCVTWLGYVNSAVNPVL  
YASLNRAFRRAFGILFSPRELAKGRRDAEFTD\*

>Pm-tarl2c

MDKHQTNHAAVAADMVYTNSTATPVDAEPGPTCVVLQGA FNCTGPGPLLPLPSPLAALALAAALL!  
LSAAAVLGNALVVLAVAYFARLR!  
PTNALALSLAVADLLVGAVVVPFSATRAVRGCWLHGATFCQLHTCLDVMLSTASIVHLSCIAFD RYV  
AICDPLRYTARVTPGAVAAMLVACWLGPLLYVAPIMLGLQSVGAEASLALACPDCCPFVMSATFSLA  
ATSCSFVAPMIIMLAAYARIYRVARRHARSIASRPP!TPWRRRGQGDGSG!  
RLSSAPRRWRQEYNATKTLGVILGAFFALWLPFFSAAVADGLPGGPRVDGTTWHCVTWLGYVNSAVN  
PVLASLNRFRRAFGLFSPRELAKGRRDAEFTD\*

>pm-tarl3a

LLPSRLSTGRQLQTRTNAFTLSLAVADLLVGLLVMPFSATRSLYGCWFFGRTFCKVHTCLDVLLSTA  
SIAHLGAIADFDRHTAICDPLRYDQRLTAGRAAALVAICWVGSALLAVGPILLGWNTVGI EELVASSC  
PDACVLLMNAPFAIAGSTCSFFVPSFVMVVTYLRIYRVALHQARAVRNVSVSSVAWEHCDINSRPE  
KRTDQRRDRSATKTLGIIMVAFVTCWLPYFSLTLLDPFTGFLAEPVWESTAWLAYMNSALNPILYP  
AFNQAFRQAFRLVFTCAWRLRNVRANLA\*

>Pm-tarl4a

MYMGKYASPALALNSSIQNGTFQSHCVLTQFNLVCRQPTVPPEYAEVILIAMIMSIILNMFGNALII  
AAILYFTSSLSVADILVGVVMPFYMN\*CVYNCWFYGHAFCKVHHFLHAF LPTASTMHFCCI GYDRY  
LAICDPFHYQERFTRTAVIALAATWLGSLLYVVPIMLDWIDIEEMVAERTCPDN CIFFTNKVFSSC  
GAFFSFVLPMGIMTVTYAKIYRIARKQARSIGAQQHGM LGQTALGFNKQQWAAMKREHNATKTVSII  
LGIFICWAPFFGTIVIDPYLNYTTKPVVWEMLNWIGHVNSAINPFLYGC FNRTFRNAICII FSRLL  
QPGIRSAEL\*

>Pm-tarl4b

MYMGKYASPALALNSSVQNGTFQSHCVLTQFNLVCRQPTVPPEYAEIILIAMIMSIILNMFGNALII  
AAILYFKQLQVLPNVFTFSLSVADILVGVVMPFYMNQCVYNCWFYGHAFCKVHHFLHAF LPTASTM  
HLCCIGYDRCLAICDPFHYQERFTRTAVIALAATWLGSLLYVVPIMLDWIVIGIKEMVAERTCPDN  
CIFFTNKVFSLSCGAFFSFVLPMGIMTVTYAKIYRIARKQAHSIGAQQHGM LGQTALGFNKQQWAAMK  
REHNATKTVSIIILGIFMICWAPFFGTIVIDPYLNYTTKPVVWEMLNWIGHVNSAINPFLYGGFNRTF  
RNAICII FSRLLQPGIRSAEL\*

>pm-tarl5a

MNSTLIKCIITYYNLNCCTPHLSYTHGLVVQGVLLFFIISTILGNMLVIASIIYFKQLQSHTNSLTL  
SLAAADLLVGLVMPFSMMRTVHSCWFYGKLLCKLHCSLDYIFSTVSIHLHLSCVAFDRYVAICDPLH  
YTSRVTNNTVAFMLILCWTCLVYFAPFLSWNIIGIEEMVQSRICADTCAIVKNVWFAYVDTCCAF  
ITPMAIMITTYVKIYRVARRQARQVSAASVALQLNRDERQNQWALMKREHNATKTLGIIMGGFLFFW  
LPNFVASLIDPVNDFQTDPLVWNIIVVWLGYINSTINPLLYASFNRPFKAFKIMFSLEITHLSTRNK  
DLLD\*

>Pm-tarl5b

MAQSVLKLNLTLNLTNVSSNSCVLNAFQLLCPPEMSYASSVLVQTALVICIVAVGNTLVIASIAY  
FRELQSRMNVFTLSLALADFLVGVLIMPFSMLKTVHNCWFFGRWFCKIHTSLDYIFSTASIVHISCI  
AYDRYNAICHPLCYTQRVNRAKVVVMLGGCWVAPVIYVAPIMLGWNIIGIEEVVASMTCPDSCVMFK  
NTTFVLLD TVCAFMPMSIMGVAYGKIYRVARDQSRRVHSQHQQQVDGNALKREYNATKTLGLIMGA

FCVCWLPYCVVNVVDVFNNDQTSRWVWSVVAWLGYINSGFNPVLYGLFNRPFRAFAIVLSKRIFTS  
DTRNVDLFRED\*

>Pm-tarl5c

MAQSVLKLNLTLNLTNVSSNSCVLNAFQLLCPPPEMSYASSVLVQTALVICIVAVGNTLVIASIAIY  
FRELQSRMNVFTLSLALADFLVGVLIMPFSMLKTVHNCWFFGRWFCKIHTSLDYIFSTASILHLSCI  
AYDRYNAICHPLCYTQRVNRAKVVVMLGGCWVAPVIYVAPIMLGWNIIGIEEVVASMTCPDSCVMFK  
NTTFVLLD TVCAFMPMSIMGVAYGKIYKVARQSRRVHSQHQQQVDGNALKREHNATKTLGLIMGA  
FCVCWLPYCVVSLVDVVFVHFQTSGVVWSVVAWLGYINSGFNPVLYGLFNRPFRAFAIVLSKRIFTS  
DTRNVDLFRED\*

>Pm-tarl5d

MEPNFTKIANLTNSSSGSCVLNAFQLLCPPPEMSYASSVLVQTALVICIVAVGNTLVIASIAIYFR  
ELQSRMNVFTLSLALADFLVGVLIMPFSMLKTVHNCWFFGRWFCKIHTSLDYIFSTASIVHISCIAY  
DRYNAICHPLCYTQRVNRAKVVVMLG

>Pm-tarl6a

MENRTVGPYDHCVDSEFYHLNCSPTFMSERTAAALSAITTLILATVLGNLLIITSIAIYFRQLQTRTN  
IMALSLAVADLLVGLTVMPYSMMKAVYKCFYQFFCNLQYFLDYMLTNSSIMHLGCIAYDRYVAIC  
DPLRYSQRVTNHTVATMLLISWFGPALFSSPILVNFNPEWSRGIIEIISCPNQCLFFVSTWLVSVVG  
VCPYVLSLLTMSYVYARIYVVARRQGRQISSVSLQVHAQQQQQQQVEHTNTRQKWTAMKREYSAKT  
LGSIIIGFYLLSWLPFYMVVLFFPNFQNSSAAVRITTWIGYISSAINPVLYATLNRPFSAFVAVISC  
KMLSSTRARTMDLSGVK\*

>Pm-tarl6b

MANTTKTLQCIDYHGYNCSGPSLPEKSQPIILIIISFFIVVTILSNLLIISSVIIFRQLQTHTNILA  
MSLAVSDFSLGSMVPLRMMGTVYNCWYYDYSEFCNVLYFVDYTLCTSSIFHLSCIAYDRYVAICDPL  
RYAQRVTKRAIVAMLLISWLGAALFTSPSLLSFSPQLAPGAIEREGCPDDCLFSVDVSLHFFYGACP  
YFITMLVIMAVYARIYHVARRQARQIKAATTKVQSQQQQRVSSMRREHNATVTLGSIIAAFFLSWLP  
FYIIVLVFPFVSNFDVEYEVATWMGYISSAVNPLLYASFNRRQFRGAFRKLILSLRIFRAGERNFRLSE  
\*

>Pm-tarl6c

MFCGLVFLALDNSTTMDNSTTGSLSLHYENYNTGPSLSEEDRILTLAIIIFFIATILGNLLIIV  
AIAFFRQLQTHANILALS LAVSDFFIGLLIMPFRMMHAVYQCWFYASFFCHLHYFLDYTLTTSSIIH  
LSCIAYDRYVAICDPLRYPTRVTDRTVAVMLALCWIGAAIFTTTPALLSLSPTLSRGTIERGGCPDNC  
MFIVNLGLHFAYGMC PYFLSMFIILLIYSKIYRVARRQARRVTADVPMEAQRTEVANGGSSGGSGGG  
DEAAKRWKSTMKREHNAAKTLGSIIGCFMLSWLPYDILVIFPFYKNTSVAYEVVCWIGYISSTVNP  
ILYASINRPFMAFGRILRLDFFSAEARHLELSKH\*

>Pm-tarl6d

MDNSTTGSPLSLHYEYNTGPSLSEEDRALTLAIIIFFIATILGNLLIIVAVIAFFRQLQTHANTL  
ALS LAVSDLLIGLLIMPFSMMHAVYECWFYASFFCHLHYFLDYTLTTSSIIHLGCIAYDRYVAICDP  
LRYPTRVTDRTVAVMLALCWIGAAIFTTPTLLSLSPTLSRGTIERGGCPDSCMFTVDLGLHFAYGMC  
PYFLSMFIILLIYSKIYRVARRQARRVTAGVPIHAQRVEVANGASSGGGRDGDEAAKRWKSTMKREH



NAAKTLGSIIGCFMLSWLPYYILVIVFPFYKNTSTAYEVVCWIGYISSSTVNPILYASINRPFRTAFGRILRLDFFSAEARHLELSKH\*

>Pm-tarl6e

MDNSTTGSPCSLHYEYNNCTGPSLSEEERTLTLAIIIFFIATILGNLLIIVAIGFFRQLQTHANILALSLAVSDLLIGLLIMPFSSMMHAVYECWFYASFFCHLHYFLDYTLTTSSTIHLGCIAYDRYVAICDPLRYPTRVTDRTVAVMLALCWLGAAILTTPTLFSLSPTLSRGTIERGGCPDSCMFTVDVGLHFAYGMC PYFLAMFIIILLIYARIYRVARRQARRVTAGMPIHSQRGEVANGGSSGGSDGDEAARRWKLTMKREHNAAKTLGSI IACFMLS WLPYDIMVMVFPFYKNTSAVYEVMSWIGYISSSTINPILYASINRPFRIA FGR ILYLDVFSSEARHLELFQH\*

>Pm-tarl6f

MYNNTSNPCAALYHGYNCTGPSLPPTNLCVAVVLLSSFIAATVLGNLLIICSI AFFKQLQTFPTTLA LSLALSDFLVGLVIMPFVAVMKTAYRCWFCASAF CNAHHFLDYMTNSSIFHITCIAFER YVAISDPL RYRARVTRKTM AAMLLL CWLGSALFSSPSLVSLMSKSASGGLIQRVRCPNDCVFSVYIGIQAVIGIS PYFISLVVIVLVYGR IYSIARRQAQKINSEGSRRRQDAAAASA ACTDALHKWKAMRREHNATKTLG VIIFFFLLSWLPYNVTVIVFEFVAYASDVYQVTLWIGYISSAFNPILYACFNRPRTAFHRILRLKVFTLADRDFAFSTAQDGGH\*

>Pm-tarl6g

MNHTSAPSTRNPCVTFRSFNCTGPSLPENYRALLAILAFFTLATILGNLLI ISSIAFFRQLQSFNVLALS LAFSDFLVGLVIMPLAVTKVIYNCWFYARLYCNVHYFLDFTFTNCSILHLCSIALNRYVAITDPLRYESRVTRRTLVMMLVTCWLGSAVSSSPILLSLSP TLSVGTIKRISCPDDCVFDINIGIMV VIGYCPYFASLVVIVCIYGKIYRIARAQVTKIRAQQGGGAGGGGAGGGGGPRTDKDNAEALLKLRTMKREHSATKTLGVIIGFFLISWLPYYVIVLASLALADTLLAYRVALWIGYISSAFNPILYAAFNRPF RNAFRLMFRLKVFGE GARDTDL SGR LK\*

>Pm-tarl6h

MANLTDTHASAGCILYMDAFNCTGPTMPLPARSASLAVISL FVVTTVLGNLLIISTIAFFKQLQ TST NVLALS LAVTDFLIGLIIMP MAMTKEMFNCWFYGDVFCNVHFFIDYMLTNC SMLHLGSI ALQRYVAISDPLHYATRMTRRSLAAIIGFCWLGSAVFSSPILLSFSSALSEQTVARKSCADNCLFYVHMGIMFVVG YCPYFASLLVIVCVYAKIYRIARNQMRKIRSVACKVEETTLQVIKREHNATKTLGVI IFFFLLVSWLPYYLIVLSSMAVKNTMSVYRVALWAGYISSAFNP LLYASFNLHFRNAFKMMLSCKIFAPGARHTNLN YLNKATNDHN\*

>Pm-tarl6i

MDNSSLASSPSCVISFSNLNCTPTSLNSKHDR AVAVFTISLFI AVTILSNLLIVSAVALFRQLQTRANALALS LAVSDLLVGVVIMPLSLTKSVYKCFYAPLLCHVHFFCDYWF T TASVLHLSC IAYDRYVAICDPLRYQQRINRRTL VFM L LFCWLC SALLSTPILLSLSP TLSQGTIAKNGCPDDCRFFI SVGILFAIGMWPYFTSVLLVLMYGRIYRVARGQARKIAALS RASSGLGGGEEAGRAAASRWASMRREHSAAKTLGAI IAAFIISWLPYYIIAIVLTVDESVILPYKVS VWFGYMNSAINPILYATFNKQFRRAFKA I LTFN TFPSRAADDEMSSTKN\*

>Pm-tarl6j

MENTTSTASAKCVVSYGLNCTKMDFSSETALIVGIMSFFIAT TILSNLLI ISAVAFFRQLQTRTN  
TLALSLAVSDLLVGVVIMPLAMIKSVYKCFYVQWFCNVQFFCDYWFTTASVLHLSCIA YDRYVAIC  
DPLRYAQRVTRRRTLTFMLLFCWIASAI I STPILLSMSPTLAKGRIEMVGC PNDCRFLISVGILFTIG  
MVPYFTSVLLIMLMYGRIYHVAR SQARKIGTQSHGLPGVSSEATSRWANMKREHNATKTLGSI IAAF  
I ISWLPFYILAI VFTMYEDI FL PYKISFWIGYMNSTINPILYAVFNKQFRHAFK TMLSFKVFSSTAR  
DKEMN\*

>Pm-tarl6k

MAENSSSSSSSSNSGSGAEGSSEC VVSYGLNCTQMDFSSESALIVGIMSFFITVTI ISNLLI ISAV  
VFFRQLQTRANALALSLAVSDLLVGVVIMPLAMVKS VYKCFYARWLCNVQFFWDYWFTTASVLHLS  
CIA YDRYVAICDPLRYAQRVTRRRTLTFMLLFCWIASALLSTPILLSMSPTLSKGRIETVGC PDDCRF  
LISVGILFTIGMWPYFTSVLLIMLMYGRIYRVARGQARKIAAMDRTSSGLGGGEEAGRVAASRWASM  
RREHSATKTLGAI IAAFI ISWLPFYII IAVIFTMDES VLLAYKVAVWIGYMN SAINPILYATFNKQFR  
HAFKEILT LNVFLSPADR NKEMQ\*

>Pm-tarl6l

MTYSSNNTTGHCVELFENQICSKPKLSYEDRIVAMAVLSFFISATI FGNCLII TAI AIAFFRQLQTNT  
NALALSLAVSDLLVGAI IMPFSVNR SVYQCWFHGRVFCVHFFLDYAI CNASILCLGCI AFDRHVAI  
CDPLRYAQRVTRGTLASMI VLIWVGAALLSAPILLSLSETWAKGII EITGCPDGCHFAVHVIL TLVV  
GILPYFI IMLLMLLVYGRIYGVARRQSRQINNSRGRSASDADSRK WVMRREHSATLTLGMIVGFY  
LVSWLPYFTASVLEMAFGIST SALVWATVTWFGYANSV VNPILYATFNRPFR TAFRI IFSSEMFAPG  
ARGADLHGLKVAGG\*

>Pm-tarl6m

MTYTSSNNTTGHCVE SFENLICS KPKLSDKDRIAAMAVLSFLISATI FGNCLII TTIAFFRQLQTNT  
NTLALSLAVSDLLVGAI VMPFSASRSIHQCWFHGRTFCRVHYLDYTF CNASILCLGCI AFDRHVAI  
CDPLRYAQRVTRGTLASMLALI WVGAALLSAPTLVSLDEAWARGLMEI AGCPDGCHFAVHVGLTLVV  
GILPYFI IMLLMLLVYGRIY

>Pm-tarl6n

MMEANSTLGECHVPFLEFNCTGPGLEPTDQALVLSILILFIAATI IGNLLIVCAVLRFRQLQTRTNA  
VT TSLAVADLMVGAVII PCSMTHEVYRCWFFGQTFCRIHYFMDYWFTNASILHLGCI AFDRYVAICD  
PLRYQQRVTNHTVVLMLLMCWLCSALFSAPILISLSDVLSNGVMDRTSCPDECVFIVNLGLTFLIGI  
CPYFLSLFILSLAYAKIFRVARVQASQIHAAGKHGADSSSSSASIVGDANSKRTWLAMKREHNAAKTL  
GMIIGFFLLSWLPFYVIVSVDVIIDYQTNVLRRTVTWVG YFSSAVNPVLYASFNRPF RNAFRDIVS  
CRAFAVGARNKDLEFS\*

>Pm-tarl6o

MPETNSTLGKCAAPFLQLNCTGPGLEPTNQAFVLSII ILLIVVTI IGNLLVACAVLRFRQLQTRTNA  
VT TSLAVADLMVGAVII PCSMTQEVYRCWFFGQTFCRIHYFMDYWFTNASILHLGCI AFDRYVAICD  
PLRYQQRVTNRTVVLMLLMCWLCSALFSAPILISLSDVLSRGVMERTSCPDECVFIVNFGLMFI IGI  
CPYFLSLITLSLAYAKIFSVARVQASQIHAAGKHGADSSSSSASIVGDANSKRTWLAMKREHNATKTL  
GMIIGFFLLSWLPFYIISVDVIIHYQIDAVMWGTVTWIGYFSSAVNPILYASFNRPF RNAFRDIVS  
CRAFTSRRGT\*

>Pm-tarl7a

MFWLHIRTSMDNQSDVEAPRLLCVNSYNNLSCSSPRLPAPQRTLALVVLI SFSACTVVGNLIVLSI  
LYFRQLQTRTNAFTLSLALADMLVGLLVMPYSMMRAVYSCWFYGSFLCKVHTWFDFTFTSSSVIHLS  
CISIDRYIAVSDPLRYPKRLGPSKVALMLVVCWSTTLAYGLPFFSGWTVLGLIEQVIARGSCRDACPV  
VGNMAFAFTNAFFAYLIPLCIMVTSYAKIFRIAREQVNKIRANSAHVPGVEFSSSSTRQQWAAMRRE  
HNATKTLGIIMGVFLIFWLPYCSVAVIDPIIGYQTSATSWDVANWIAVNSAINPVLFAFNRSFRG  
AFRLIFTCRVSSSTYRNADLFNLKDSAN\*

>Pm-tarl7b

PRSSRGTIAGNLMVMAFIAYFRHLQTRTNALALSLALADFLVGLLIMPYSTMRSVDRCPYGGGVFC  
RVHTWLDLDFSLTSSVHLCCISYDRYVAVADPLRYPQRVTRRAVALLLCCWLSVPVYSWPIMSGWY  
SVGVDPDGPAGFPGCCREVCPSVSNATFGLANMLCAYAAPMLLSLTYAKIYRLARAQARKIDAATAGL  
RRLGPADGAADDGDGGRWKAAMRREHNATKTLGVIAGVFVLCWVPYFVLSASDSLDDATRRAADI  
SNWLTYVNSTLNPVLLVALNRSFRNAFRATVACRVFAPGFRTADLFNYDGSER\*

>Pm-tarl7c

\*VYRSLCESRQLQSRSNVLVASLAVADLLVGLLIMPFSARTAYNCWFYGD LFC HLHTWLD FSTCTS  
SIANLACISLERYASIAEPLRYRQMVTPRVLAAMLLLSWSGLPLYGATFMLGWNLVGIKRQVTESSC  
RHDCRVYMNPASTATNVLVAYVTPMLLMIVANAKIHLARAQVRRIEGSAMVSGRDDRASKREHNA  
TQTLGIIITGTFILLWMPYFILVASEPLLGYGTSRAAWEVVCWLPYLNSAVNPVLLMVFNRSFNAGFR  
LALKGGVLKSKCRGIDLNFNRDGNM\*

>Pm-tarl7d

MNESGSIDSSRRCVWTFHQVSC TSSDL SAAERATLLAILLSISAITIAGNILT IASILYFRQLQTRP  
NVLTLSLAVADLLVGLLIMPFSAMRSVYNCWFYGWTFCKIHSWFDYTLCTLSVLLLS C ISFDRYVAI  
SDPLRYSDSVTHAALAAMLALS WFSFPIDGLVFMQWNLVGL EEE TRRSCPD DCEVILNLPYAVAIT  
TCAFVLTMLLMALAYDRIYRLARVQSREINSLGAQVQKASSDGECLSKWNAMKRDHNATITLGI IIG  
IFIVIWMPYFVVSATEPMVGYQAGPVAWEVINWFTYLN SMANPILFAAFNMSYRWA FRLLMCSAFR  
PGIRGVDLNFMERPA\*

>Pm-tarl7e

METLNESIRNSSLLCVEAFHNFHCTYNDVSEAERAILIAIIIPAIAITIFGNLLTVVSI LYFRQLQT  
RTNVLTFLAVADLLVGLLIMPFSAMRSVYNCWFYGWTFCKIHSWFDYTLCTLSVLLLS C ISFDRYV  
AISDPLRYHQRI TNRTCALMLLFCWLCLPFYGLVFMLEWNLVGL EEE LAQICPD DCPVLLNLPFAMA  
NTIFGCVVP MILMTLAYGRIYQLARQQARKITSTAMG SNVDSARS SLRREHSATITMGI I VGVFISL  
WMPYFVVSTTESIFGYQASSLAWEFINWFTYINSTVNPI LFAAFNRPF RNAFYLILSGRIFSSSYRG  
VDLNFVQHGSKVNQGA KR CVSTLISKESDR\*

>Pm-tarl7f

MPLHNESFPSVLCVVT FAFNCTPSQMTNVERALLMGAFTI AVATTITGNMLTISSILYFRQLQTRT  
NVLALSLALADLLVGLLVMPFASTR TAYGCWFYGR TFCKVHTWFDYTLCTSSILNLMCISLERYVAI  
CDPLRYARRVTGATLVAMLVLCWSGVVAYGLAYLLEWNIAGIEDSVQQTTCPDNCPVFMNVQFALTN  
TLCAYVTPMLLM LAAYANVYAMARAQARKISIAMLQARSADAAVRSRWSAMKREHSATKTLGIIMGA

FVVFVWVPPFFVVAASEPLLGYASDPVVWEVANWFTYINSTMNPILFAAFNRSFRNAFYLIVSGKIMRG  
SYRGTDLFSFNGSGK\*

## Cartilaginous fish and tetrapod TARL

### >Cm-tarl2

MDTSHSPFFNYTLSCNSSESVPYTARQVIQCVTTLVLTIIITLLTVLGNVLVIASIAFYFTKLQTPTN  
AFILSLATADILVGLVVMPPFSMVKAVFGWYFGRI FCKIHSIMDVMLCTSSIVNLSCIAFDRIYFAVCY  
PLKYRFTMSRKRVTFLLLICWILPALVSI VPLVLDLHVIGLEDSFEQLDSQDCV FVVNI PYSVTASI  
IAFYLPMPVILVAYAKIFLVATNQVREIAARQQGMNLEMIQQNSSIRKERKAAKTLGIIIGCFLLCW  
VFFFTLNII DPLLGYQADSILIEVFLWLGLYNSGLNPFLYAFFNKSFRRAF SMI I SCKIITKDCHYN  
SLAGSTKLNTRLKTI SRQFTLTSELFDEEE\*

### >Le-tarl2

MLSAVIICPTSQVVNVLIIYNCSAHRNSSAIVPRATWQII EQVFILTVLTI!  
ILGAFLGNLLVIVSIIYFTKLRTVTNAFLLSLAVADFLVGIIVMPFSMIKVMFGWYFGKAFCTIHTV  
MDVMLCTSSIMNLSCIAFDRIYAV\*YPLRYRFRVSQKRVTLLLVCWVLPGLVSFVPLLLGLHLTGL  
ETIHSQLDPHDCVFIVNIPYALCASVIS! YLPMLVMLAAYGKIFQV!  
IQARQIYTMENGHEMDATRFHHSTSTKKERKAAKTLGVIIGCFLFCWLPFFTANIANALLGYQVHH  
IVLEVFWWLGYVNSALNPLLYALFNKSFRAFLIL

### >Rt-tarl1

MQNTSGLFKVSTSSGWRMADRCLSSIGSPAVRTGLYLFIMVIMAATLAGNFLVVLAVVYFKQLRSAT  
NAFVLSLSIADFFVVGIMVMPYSMSRTIEGCVHFGPTFCQIHSSLDVMFCTASILHLSCIALDRYYAI  
CDPLVYRCKMSPSRVVVLLACWVPAAISVIPIMLQLHRLGVDPDLLTNRSCVLMVNQTYAIWASL  
ISFYLPMMVMLVAYWKIYQAARKQAIQINAMDNQVQGYASGLATAHVRKQSNKRERKAAKTLGIIIG  
IFLSSWLPFFMANIVDPFLGYKIDRGTWEVLVWLGYSNSMNPILYGVVNRSFRAFLIIISCKICV  
SRSLQKHRLIQQ\*

### >Rt-tarl2

MFSAI I I I STSSQEMNTTPFNWTT HSNSSGKASSATWQVIDQVVVFSVLTVI IAGTIFGNLLVIASI  
AYFTKLRTPTNAFIVSLAVADFLVGIIVMPFSMAKLVFGWYFGKAFCKIHTIMDVMLCTSSIMNLSC  
IAFDRIYAVCYPLKYRFRMSQKRVTVLLLICWFVPALMSFVPLLLDVHLRGLLEAILLPDPHSCVFM  
VNIPYAVSASVIAFYFPMLVMLVAYGKIFLVARIQARQVYTIENGLEGRNTLTRCQNSSMKKERKAA  
KTLGIIIGCFLICWLPFFTNI VNP LLGYP AH HILLEVFLWLGYVNSTLNPLLYAFFNQSFRAFYM  
VIGCKILASDCQNNNLSDSIRQNTQLATLSR\*

### >XI-tarl1

MLNTSKWLQNASRSTNSPDESCSSVVSSTFKLILYSLTGGLIVTTFLGNILVITSIAYFKHLHSPT  
NSFVLSLAVADFLVGGVMPFSMIRTIEGCVYFGSVLCRLHSSLDVMLCSASILHLSCIAFDRIYAV  
CNPLLYSYKMSTRVSVLICTCWVIPMLISFAPIMLGLHLLGMEHLLQEGTCLFVVNHIYSVSASLI  
TFYCPMTIMFVAYCKIYRAARKQALQIHDMKRNVTTQYGGDCSMKKRKYSLKRERKAAKTLGVIMGL

FLFFWSPFFTANIVDPLIGYKMGWGVFLWLWLVNSALNPFLYGLLHKSYYRAFFMIIGCKTCYS  
ATSLNIDLSSTKQEKVKRKTDLH\*

### >Xt-tarl1

MAVASTTASSPMDSCSSVSSSTSKLILYLLTSGLIMTTFLGNILVISSIVYFKQLRSPTNSFVLSL  
AVADFLVGVMPYSMVRSIEGCWYFGSGFCRLHSSLDVMLCSASILHLSCIAFDRIYAVCNPLLYG  
YKMSTRRVSILICTCFIPVLISFAPIMLGLHLLGMEHLWQEGACLFVFNQIYSVCASLIAFYCPMI  
IMLVAYCRIYRAARNQALRIHAMERNVSSGNASDGPMKKRKYSLKRERKAAKTLGVMGLFLLFWTP  
FFTANIVDPLIGYKMGTVWEVCLWLWLVNSALNPFLYGLFHKSYYRAFFMIVGCQTCYSGTSQNI  
LSTAKQEKVRRQMNVLH\*

## Bony fish TARL

### >Aa-tarl1

MANTSAAANVSVDTGDDSTPCVPWRSQGSRVALYMFIMAGIACTVVGNFVLAIAFYFKRLQSPTNS  
FVMSLAVADFLVGLIVMPYSMVRTVEGCWYFGPTFCEVHSSLDVMLCTASIFHLSCIAFDRIYAVCN  
PLVYAFKMSRVRVGLLIVVCWVPLLSFGPIMLGLHKGIDIQLEPEGICAFVNRVYAVMASLVA  
YLPVIMLVAYWKIYKAAKRQAMQISAMEHQMTVHGLNSAGRKQKQRQNCMRERKAAKTLGIIMGA  
FLLFWLPPFTTNVDPFIEYRTAGVVWDVFLWLWLVNSALNPFLYAFFNRSFRRAFFMIMGCRICLP  
GSPASIDLSLTKRDANEHIEN\*

### >Ac-tarl1

MDNSTLGWLGDNTSLQLELQPCALLRHQVSRIFLYAFLSFGIICTVVGNFVLSIAFYFKQLQSPT  
NCFVMSLAVADCLVGLVMPYSMIRTVEGCWYFGSLFCQIHSSLDVMLCTASIFHLSCIAFDRIYAV  
CNPLVYSLKMSHRVALFIAVCWVPIILISFGPIMLDLHTAGVNILIPKDLVFLVNRVYAVMASLV  
AFYLPMAIMLVAYWKIFKAAKRQARQISAMESQMAAGVGKDSKKRHRNAMKRERKAAKTLGIIMG  
VFLIFWMPFFFTVNIVDPFIEYSTEVVWDFLWLWLVNSALNPFLYGLFNRSFRRAFLMFMGCRVCL  
PGSSSGMELSHTRKEANECADQS\*

### >Af-tarl1

MDNGSLGGLGDANTSLQNELQSCITLRNQVSRIFLYAFLSVGIVCTVVGNFVLSIAFYFKQLQSPT  
NSFVMSLAVADCLVGLVMPYSMIRTVEGCWYFGVQLCKLHSSLDVMLCTASIFHLSCIAFDRIYAV  
CNPLVYSLKMSRVRVALLIVICWAVPTLISFGPIMLDLHIADVDILLPKNVCVFLVNRVYAVMASLV  
AFYLPMAVMLIAYWKIFKAAKRQARQISAMESQMAAGVGKDSKKQRHRNTMKRERKAAKTLGIIMG  
VFLIFWMPFFFTVNIVDPFIEYSTEVVWDIFLWLWLVNSALNPFLYGLFNRSFRRAFLMFMGCRVCL  
PGSSPGMELSHTKERGK\*

### >Aj-tarl1a

MANTSAAANVSVDTGDDSTPCVPWRSQGSRVALYMFIMAGIACTVVGNFVLAIAFYFKRLQSPTNS  
FVMSLAVADFLVGLIVMPYSMVRTVEGCWYFGPTFCEVHSSLDVMLCTASIFHLSCIAFDRIYAVCN  
PLVYAFKMSRVRVGLLIVVCWVPLLSFGPIMLGLHKGIDIQLEPEGICAFVNRVYAIMASLVA  
YLPVIMLVAYWKIYKAAKRQAMQISAMEHQMTVHGLNSAGRKQKQRQNCMRERKAAKTLGIIMGA

FLLFWLPFFTTNVDPFIEYRTAGVVWDVFLWLWLGYNSSLNPFLYAFFNRSFRRAFFMIMGCRICLP  
GSPASIDLSTLRDANEHIEN\*

### >Aj-tar1b

MPCVSAFIFPAAERSHNHTETGFSNCSAGDHDSMESMKVLLLFLLLPIIVFAILGNLFIVLSVAYFR  
QLQTSTNAFIVSLATADFLVGALVMPFSLVRSVDRWRFGQLFCTAHFLLDVILCTASIFNLSCVALD  
RYLAVCDPLRYPARMSAARVAKLLLLSWLIPVSGSCLLVADLHTQSGEGVLTGRGGEECFPEMRAP  
YGVMAVLSFFLPMFVVAAYGRIFQEAQRQARQIQAAEAHVRSHPAQSPSVPQATPGIAARKAGK  
ATRTLGIILLGGFLLCWLPPFSVNVGHPLCGRPVGROVQECVLWLWLYANSALNPVLYAFVNRAFRRSF  
VILLACGILGRRLQDGPLDPGASRNTGPELGSVAR\*

### >Al-tar1

MDNISLEWTREANTSLOTEMSCATLRNQVSHIFLYTFLSAGIVSTVVGNFLLVLSIAYFKQLQSPTN  
CFVMSLAVADCLVGLLVMPYSMIRTVEGCWYFGSLFCKLHSSLDVMLCTASIFHLSCIAFDRIYAVC  
NPLVYSLKMSPNRVALLIAVCWAVPMLISFGPIMLDLHIADIDIPIPEDMCVFLVSRIYAVMASLVA  
FYLPMAVMLVAYWKIFKAAKRQAQQINAMESQMAAGVGKDSKSKKRHRNTMKREGKAAKTLGIIMGV  
FLIFWMPFFTINIMDPFINYSTEVVWDVFLWLWLYINSNLNPFLYVYFNRCFRRAFMLFIGCKVCLP  
GISPGMELSHSKKEAN\*

### >Am-tar1

MANSSDWLEDSNASLVGDLEACTTVRSPGSRIALYIFIIIGIFCTVVGNFLLVLAIAFKQLQSHTN  
SFVMSLAVADFLVGLLVMPYSMVRTVEGCWHFGATFCHLHSSLDVMLCTASIFHLSCIAFDRIYAVC  
NPLVYSFKMSRSRVALLIVVCWAVPLLIISFGPILLGLHKLGVNVSLPENVCVFLVNRVYAVIASLVA  
FYLPMATMLFAYWKIYKAAKRQAMQISAMEAQMAAGVGKDSKSKQKHRNSMRERKAAKTLGIIMGV  
FLLFWLPFFTVNIVDPFIDYSTAGVIWDVFLWLWLYVNSNLNPFLYGFNRSFRRAFMLMIMGCRICLP  
GSAPGMDLSLSRKDANERTENQ\*

### >Ar-tar1

MQCFFFGRFQEAMANTSAAANVSVDVTGGDSTPCVPWRSQGSRVALYMFIMAGIACTVVGNFLLVLAIA  
AYFKRLQSPTNSFVMSLAVADFLVGLIVMPYSMVRTVEGCWYFGPTFCEVHSSLDVMLCTASIFHLS  
CIAFDRIYAVCNPLVYAFKMSRVRVGLLIVVCWVPLLIISFGPIMLGLHKGVIDIQLPEGICAFVFN  
RIYAVMASLVAFYLPVIMLVAYWKIYKAAKRQAMQISAMEHQMTVHGLNSAGRKQKQRQNCMRER  
KAAKTLGIIMGAFLFWLPFFTTNVDPFIEYRTAGVVWDVFLWLWLYVNSNLNPFLYAFFNRSFRR  
AFMIMGCRICLPSPASIDLSTLRDANEHIEN\*

### >Ar-tar2

MPCVSASIFPAAEQSHNHTETGFSNCSAGNHDSTESMKVLLLFLLLPIIVFAILGNLFIVVSVAYFR  
QLQTSTNAFIVSLATADFLVGALVMPVSLVRSVDRWRFGRLFCTAHFLLDVILCTASIFNLSCVALD  
RYLAVCDPLRYPARMSAARVTKLLLLSWLIPVSGSCLLVADLHTQSGEGVLTGRGGEECFPEMRAP  
YGVMAVLSFFLPMFVVAAYGRIFQEAQRQARQIQAAEAHVRSHPAQSPSVPQATPGIAARKAGK  
ATRTLGIILLGGFLLCWLPPFSVNAGHPLCGRPVGROVQECVLWLWLYANSALNPVLYAFVNRAFRRSF  
VILLACGILGRRLQDGPLDPGASRNTGPELGSVAR\*

### >Bp-tar1

MANHTSETPASFNFTDVLELDCSILRNQTSQVFLYIFLSLVI ICTVVGNLVLVLSIAYFKRLQSATN  
FFVLSLAVADCLVGLIVMPYSMVRTIEGCWIFGPLFCQIHSSLDVMLCTSSIFHLSCIAFDRIYAVC  
NPLCYSLKMSNNRVVFLIILCWGVSSLSIFGPMLELHVANTDIEIPKDSCVFVNVQIYAVLASVVS  
FYLPMLTMLLAYWKIYKVARQARQISAMESQMGKDTSKKKRHRNAMKREGKAAKILGIVMGVFLF  
WMPFFTINVDPFIGYRTEAVVWDVFLWLGLYVNSLNPLLYGFFNRSFRAFLMFIGCRVCLHQPLS  
WVELSQTKKDVQNEQRN\*

### >Cc-tar1a

MENSSEWSNISLDSDFEPCATLRSSGSRVALYVFI IAGIVCTVVGNFLVLAIAIYFKQLQCPTNSFV  
MSLAVADFLVGLVMPYSMVRTVEGCWYFGPTFCHLHSSLDVMLCTASIFHLSCIAFDRIYAVCNPL  
VYSFKMSRKRVGLLIVVCWAI PFLISFGPILLGLHKLGMVPLTENMCIFLVNRVYAVMASLVAFYL  
PMVTMLVAYWKIYKAAKRQAMQISAMEAQMAAGVGKDSKKQKHSNSIRRERKAAKTLGI IMG!  
FLLFWLPFFTNIIVDPFIEYGTAAVIWDVFLWLGYVNSLNPFYLYGFFNRSFRAFLMIMGCRICLH  
GTAQGMDLSHSHKRDANERTDNQ\*

### >Cc-tar1b

MENSSEWINISLDSDFEPCATVRSSSRVALYIFIITGITCTVIGNFLVLAIAIYFKQLQCPTNSFV  
MSLAVADFLVGLVMPYSMVRTVEGCWYFGPTFCHLHSSLDVML\* TASI FHLSCIAFDRIYAVCNPL  
VYLFKMSRKRVGLLIVVCWAI PFLISFGPILLGLHKLGMVPLPANVCIFLVNRVYAVMASLVAFYL  
PMVTMSVAYWKIYKAAKRQAMQISAMEAQMAAGVGKDSKKQKHSNSIRRERKAAKTLGI IMGGFL  
FWLPFFTNIIVDPFIEYGTAAVIWDVFLWLGYVNSLNPFYLYGFFNRSFRAFLMIMGCRICLHGTT  
QGIDLSNSKRDASEHTDKK\*

### >Ch-tar1

MNASWLDESNASVTGVIESCAILRNPGRVALYTFFLAGIVCTVVGNFLVLAIAIYFKQLQSPTNCF  
VMSLAVADFLVGLVMPYSMVRTVEGCWHFSATFCQLHSSLDVMLCTASIFHLSCIAFDRIYAVCNP  
LVYSFKMSRARRVALLIVVCWAVPLLI SFGPILLGLHKLGMVPLPANVCIFLVNRVYAVMASLVAFYL  
LPMAIMLVAYWKIYKAAKRQAMQISAMESQMAAGVGKDSKKQKHSNSLRERKAAKTLGI IMGVFL  
LFWLPFFTNIIVDPFIDYSTAGEVWDVFLWLGYVNSLNPFYLYGFFNRSFRAFFLIMGCRICLPGS  
NPSMDLSHSHKRDGNDN\*

### >Cn-tar1

MENGSRWPGNSNASVQIELLACVTMRSHISRIFLYTFLSVGIVCTVVGNFLVLSISYFKQLQSPT  
NSFVLSLAVADCLVGLLVMPSMIRTVEGCWYFGSLFCKFHSSLDVMLCTASIFHLSCIAFDRIYAV  
CNPLVYSLKMSNSNVALLIAICWTVPLLI SFGPIMLDLHIANVDILIPSDLCVFLVSRVYAVMASLV  
AFYLPMAVMLVAYWKIYKAAKRQSKQISAMESQMAAGVGKDSKKKKRHRNTMKREGKAAKTLGI IMG  
VFLVFWMPFFTNIIVDPFIEYSTEVVWDVFLWLGYINSSLNPFYLYGFFNHCFFRAFLMFIGCRVCL  
PGISPGMELSHSHKVKKN\*

### >Cr-tar1

MCFDRLNLTMDNSSLGLLGDANTSLOIELESCITLRNQVSRIFLYVFLSVGIVCTVVGNFLVLSIA  
YFKQLQSPTNSFVMSLAVADCLVGLVMPYSMIRTVEGCWYFGVLLCQLHSSLDVMLCTASIFHLSC  
IAFDRIYAVCNPLVYSLKMSHSRVALIIVICWAVPTLISFGPIMLDLHIAGVDILLPKDVCVFLVNR  
IYAVMASLVAFYLPMAIMLIAYWKIFKAAKRQAMQISAMESQMAAGVGKDSKKRRHRNTMKRERKA

AKTLGIIMGVFLIFWMPFFTVNIVDPFIEYSTEVIAWDIFLWLGYINSSLNPFYGLFNRSFRRAFQ  
MFMGCRVCLPGSSPGMELSHTKKEANERAD\*

### >Cs-tar1

MDYGSLGLSRDYNRSFQIEIESCPAPRSQASRVLLYAVFFAVITCTVFGNFLVVLISIAYFKQLQSPT  
NSFVMSLAVADCLVGLIVMPYSMVRTVDRCWYFGALFCRIHSSLDVMLCTASIFHLSSIAFDRIYAV  
CNPLIYSLKMSRSRVALLIVACWVPMFISFAPIMLDLHVAGVNVYLPPEELCLFLVNRIYAVMASVV  
AFYLPVIMLAAYWSIFKAARRQAQQISVIESQMAAGVGKDTSRKRRHRNTIKRERKAAKTLGIIMG  
VFLIFWMPFFTVNILDPFIDYSTEVVVWDVSLWLGYINSSLNPFYGLFNRSFRRAFMLFLGCKVCL  
PGTSSGMELSQTRKEPSGRDKA\*

### >Cv-tar1

MENGSREWPGNSNASVQIELLACVTMRSHISRIFLYTFLSVGIVCTVVG NFLVVLISISYFKQLQSPT  
NSFVLSLAVADCLVGLLVMPFSMIRTVEGCWYFGSLFCKFHSSLDVMLCTASIFHLSCIAFDRIYAV  
CNPLVYSLKMSNSNVAMLIAICWTVPMLISFGPIMLDLHIANVDILIPSDLCVFLVSRVYAVMASLV  
AFYLPMAVMLVAYWKIYKAAKRQSKQISAMESQMAAGVGKDSKKRHRNTMKREGKAAKTLGIIMG  
VFLIFWMPFFTVNIVDPFIEYSTEVVVWDVFLWLGYINSSLNPFYGLFNHCFRRAFIMFISCRVCL  
PGISPGMELSHSKKEKN\*

### >Dl-tar1

MDNSSLGLLGDVNTSLKTEIQSCTTLRNQASRIFLYAFLSVGIVCTVVG NFLVVLISITYFKQLQSPT  
NSFVMSLAVADCLVGLLVMPYSMIRTVIEGCWYFGVLFCLRHSSLDVMLCTASIFHLSCIAFDRIYAV  
CNPLLYSLKMSRSRVALLIVVCWAVPMLISFGPIMLDLHIAGVDVLLPEDVCVFLVNRIYAVMASLV  
AFYLPMAIMLVAYWKIFKAAKRQARQISAMESQMAAGVGKDSKKQRHRNTMKRERKAAKTLGIIMG  
VFLIFWMPFFTVNIVDPFIEYSTEVVVWDIFLWLGYINSSLNPFYGLFNRSFRRAFMLMFMGCRVCL  
PGSSPGMELSHTRKEANERADQP\*

### >Dr-tar1

MENTSEWSNNSLDSDFEACATLRSFGSRVALYLFIIITGILCTVVG NFLVVLAIAYFKQLQCPTNSFV  
MSLAVADFLVGLLVMPYSMVRTVEGCWYFGPTFCHLHSSLDVMLCTASIFHLSCIAFDRIYAVCNPL  
VYSFKMSRKRVLGLLIVVCWAI PFLISFGPILFGLHKLGVDIPLPENMCVFLVNRIYAVMASLVAFYL  
PMVTMLVAYWKIYKAAKRQAMQISAMEAQMAAGVGKDSKKQKHRNSIRRERKAAKTLGIIMGVFL  
FWLPFFTVNIIDPFIEYGTAVVIWDVFLWLGYINSSLNPFYGLFNRSFRRAFMLMIMGCRI CLHGSA  
QGMDLSHSHKRDGNERTDN\*

### >El-tar1

MDNSSLGWSADIDVVSNTSSSPRGSVEDLCATSARRRASRVTLYAF LTAGIVCTVVG NFLVVLAIAY  
FKQLQSPTNSFVTS LAVADCLVGLLVMPYSMVRTAEGCWLF GTVFCRIHSSLDVMLCTASIFHLSCI  
AFDRIYAVCNPLVYHQMSSQGRVALLIVACWAVPLFISFGPIMLGLHEAVAPAAPDNTCVFLVNRIY  
AVAASLVAFYLP GMVMLAA YWKIYRAAKRQAMQISAMESQFSAGVGKDS SKEQRHRNAMRRERKAAQ  
TLGIIMGVFLFWLPFFTVNIVDPFVDHGTA AEVWEVFLWLGYVNSSLNPFYGLFNRSFRRAFVMI  
MGCRI CAQSLSPGMDLSKEGNEHTNK\*



### >Ei-tarl2

MMFLASNRSTTDSCVNLSAPGGHSESTSGTLQSTTVKVCVVCILLPIPVLAAILGNILIWASVVRFRS  
LQTPSNSFIVSLATADFLVAVLVMPFSLVGSVGTWCFCGNFCVAHFLLDLTLCTTSIFNLSCVALDR  
YVAVCDPLHYPARMSTRRVTLLEFLSWLIPLLVSSLCVSLGTYSLNAPSGHRGAQQESQTCVAQFHT  
PYAVAVSTVCFFFIPVLFMLFAYGKIFMAAQRQARWIHAIENQVRQLHTAQNP SRDDPNQPHPARRVG  
ARVGGFSIRKEKKAARTLGLIMGVFLLCWLPHFVSNIAFSLWGTRISPVVLD AFMWLGYANSSLNPF  
IYASFNKDFRHAFAAILGFRILGRRIRGCLVATQEVSRRVQTVGVTMETISK\*

### >Fh-tarl1

MENSSLAWPGNDSTSLQIELPSCATLRSQISRILLYAFLSAGVVCTVVGNFLLVLSIAYFKQLQSPT  
NSFVLSLAVADCLVGLLVMPFSMIRTVEGCWYFGPLFCFKHSSLDVMLCTASIFHLSCIAFDRIYAV  
CNPLVYSLKMSNSHVAQLIAICWTVPMLISFGPIMLDLHIAVVDIFIPSDVCVFLVNRIYAVMASLV  
AFYLPMAIMLVAYWKIFKAAKRQAKQISAMESQMASGVGKDSKKKRHRNTMKREGKAAKTLGIIMG  
VFLIFWMPFFTVNIVDPFIEYSTEVVVWVDFLWLGYINSSLNPFYLYGFFNRCFRAFLMFLGCRVCL  
PGISPGMELSHSKKGIN\*

### >Ga-tarl1

MENISLDLLGEGNTSLQNELYSCLTLRNQVSRIFLYAFLSVGIVCTVVGNCVLLVLSIAYFKQLQSPT  
NSFVMSLAVADCLVGLLVMPYSMIRTMEGCWYFGVLLCQLHSSLDVMLCTASIFHLSCIAFDRIYAV  
CNPLLYSLKITRGRVALLIVICWAVPTLISFGPIMLDLHIAVVDIPLPGDVCVFLVNRIYAVMASLV  
AFYLPMAIMLVAYWKIFKAAKRQAVQISAMESQMAAGVGKDSKKQRHRNAMKRERKAAKTLGIIMG  
VFLIFWMPFFTVNIVDPFIEYTTTEVVVWVDFLWLGYINSSLNPFYLYGFFNRSFRAFLMFMGCRVCL  
PGTSPGMELSHTRKEANEHSDQP\*

### >Gm-tarl1a

MDNSSLDPRTPPEPSDTS LHGTAPPCTTERHQASRLLLLYSLLSAAVVCTVVGNCVLLVLSIAYFKQLQS  
PTNCFVMSLAVADCLVGLLVMPFSMLRTL DGCWRLGALFCRLHSSLDVMLCSASIFHLSCIAFDRIYAV  
AVCNPLLYSLVMSRDRVAALIVGCWAI PMLISFGPI MGGLHAVGVDVPLPPDVCVLLVN RAYAVTAS  
LVAFYLPMAVMLVAYWKIYKAAKRQAMQISAMESQMAAGVGKDSKKQRHRNAMRRERKAAKTLGII  
MGVFLFWMPFFTVNIVDPFIEHSTHALVWDVFLWLGYINSSLNPFYLYGLFNRSFRAFLMIMGCRI  
CLPGASPRIDLSQSQEGERDQDQ\*

### >Gm-tarl1b

MFERPPRHRPPATRSGTPGPPPARSTASPAPPWSAPWVGNLLVLSIAYFKQLQSPPTASSCPLAVA  
DSLVLVLDALQQLRTWTALRAARAPLLPCHPAWKSCCAAASISTSAASPSTATTPPLSTPLPLLAG  
DVAGPRGRRLIVGCWAI PMLISFGPIQWGASTRS AWMS PAPDVCVLLVN RAYAVTASLVAFYLPMAV  
MLVAYWKIYKAAKRQAMQISAMESQMAAGVGKDSKKQRHRNAMRRERKAAKTLGIIMGVFLFWMP  
FFTVNIVDPFIEHSTHALVWDVFLWLGYINSSLNPFYLYGLFNRSFRAFLMIMGCRI CLPGASPRIV  
DLSQSQEGC\*

### >Hb-tarl1

MDNSTLGWLGDNTSLQLELQSC TLLRHRVSRIFLYAFLSVGI ICTVVGNFLLVLSIAYFKQLQSPT  
NCFVMSLAVADCLVGLLVMPYSMIRTVEGCWYFGSLFCRIHSSLDVMLCTASIFHLSCIAFDRIYAV  
CNPLVYSLKMSHRRVALLI AVCWLVPILISFGPIMLDLHVAGVDMVIPKDL CVFLVSRIYAVMASLV  
AFYLPMAIMLVAYWKIFKAAKRQARQISAMESQMAAGVGKDSKKKRHRNAMKRERKAAKTLGIIMG

VFLIFWMPFFFTVNIIVDPFIEYSTEVLWDLFLWLWLGYNSSLNPFYGLFNRSFRRRAFLMFMGCRVCL  
PGSSPGMELSHTRKEANCAEQS\*

### >Hc-tar1

MDNGSFEDGANTTLDINQDSCAMMRNPVFRFILIYGFFFIGIICTVVGNFVLSISYFKQLQSPTNS  
FVMSLAVADCLVGLVMPYSMIRTVEGCWFFGSLFCQLHSSLDVMLCTASIFHLSCIAFDRYYAVCN  
PLVYSLKMSPSRVAFLIVICWVVPILISFGPIMLGLHIAGVDILLPQEVCFVFNRVYAVMASLIAF  
YLPMAIMLVAYWKIFKAARRQARQISAMESQMAAGVGKDSKKKKHRNTMKRERKAAKTLGIIMGV  
LIFWMPFFFTVNIIVDPFINYSTEVVIWDIFLWLWLGYNSSLNPFYGLFNRSFRKAFFMFMGCSVCRPG  
ISPGMELSHTRKEINDCADK\*

### >Ip-tar1

MANSSEWMDSSNESFVGDLEACAKARSPSLRVALYSFIIIGIFCTVVGNFVLSIAYFRQLRSHTN  
SFVMSLAVADFLVGLVMPYSMIRTVEGCWNFGKTFQCQLHSSLDVMLCTASIFHLSCIAFDRYYAVC  
NPLVYSFKMSRNRVALLIVICWAVPLLISFGPILLGLHELGVDPENVCILLVNRVYAIIASLVA  
FYLPMATMLVAYWKIYKAAKRQAMQISALETQMATGVGKNSKKQKHRNYLRERKAAKTLGIIMGV  
FLLFWLPFFFTVNIIVDPFIEYRTTSVIWDVFLWLWLGYNSSLNPFYGLFNRSFRRRAFLMIMGCVICLP  
GSAPIMDLSQSKKDTNERTEKQ\*

### >Km-tar1

MDNSSLEWSDGNASLRTELQSCATLRNQVSRIFLYAFLSAGIVSTVVGNFVLSIAYFKQLQSPT  
NSFILSLAVADCLVGLLMPYSMIRTVEGCWYFGFLFCKLHSSLDVMLCTASIFHLSCIAFDRYYAV  
CNPLVYSLKMSRNRVALLIIVCWAAPMLISFAPIMLNLHIADTDIQIPEDVCLFLVSRIYAVMASLV  
AFYLPMAVMLVAYWKIFKAAKRQAKQISAMESQMAAGVGKDSKKKIHRNTMKREGKAAKTLGIIMG  
VFLIFWMPFFFTVNIIVDPFIEYSTEVVVWDVFLWLWLGYNSSLNPFYGLFNRSFRRRAFLMFIGCKVCL  
PGISPGMELSHSRKEAN\*

### >Lac-tar1

MDNSSLELLGDANASLQIELQSCATLRNQVSRVFLYSFLSVGIVCTVVGNFVLSIAYFKQLQSPT  
NSFVMSLAVADCLVGLVMPYSMIRTVEGCWYFGALFCQLHSSLDVMLCTASIFHLSCIAFDRYYAV  
CNPLVYSLKMSRNRVALLIVICWAVPMLISFGPIMLDLHIAGVDILLPKDMCLFLVNRVYAIMASLV  
AFYLPMAIMLVAYWKIFKAAKRQARQISAMESQMAAGVGKDSKKQRHRNTMKREKAAKTLGIIMG  
VFLIFWMPFFFTVNIIVDPFIEYSTEVVVWDVFLWLWLGYNSSLNPFYGLFNRSFRRRAFLMFMGCRVCL  
PGSSPGMELSHTRKDANERADQP\*

### >Lac-tar2

MLGSCCIVISIPGTNISENYSLTNDNSDSLHSTTVTVCVLCLLLPIPIFAIMGNLFIMAAAAHFQ  
SLHAPTNALVVSLAVADFLVAVLVIRLGCIFCQVHFMLDLTLCTPSIFNLKTCGHSAGIRLWSSPSF  
ASPSACTPRHLLC\*AAACSRIFRPAWPHFMSPLPLQPQLSPPFPVWSCCLRVWEHFHGHSHKQARWI  
HAIEHHTGQLQMNLSPMRANSTRQVQKKNERKAAKMLGLILGVFLFWWLPFFCMNVVHPLKGYSTSP  
LVLEASLWLEYANSSLNPFSTLNFNKSYPVVFVATLDCWIVRRQFRAGLDSSQICVVLILETISR\*

>Lb-tar1

MDNVSLGLVADTNTSLQDELYSCHTLRNQASRIFLYAFLSVGIVCTVVGNFLVVLSIAYFKQLQSPT  
NSFVMSLAVADCLVGLVVMPIYSMIRTVEGCWYFGVLFCLHSSLDVMLCTASIFHLSCIAFDRIYAV  
CNPLVYSLKMSHCRVTFVIVVCWVPMPLISFGPIMLNLIAGVNIPLNDVCVFLVNRVYAVMASLV  
AFYLPMAIMLIAYWKIFKAAKRQAMQISAMESQMAAGVGKDSKKQKHRNTMKRERKAAKTLGIIMG  
VFLLFWMPFFFTVNIIVDPFIEYSTEVEVVDIFLWLGYINSSLNPFYGFNRSFRAFLMFIGCRVCL  
PGSSPWMELSHTRKEANERADKR\*

>Lc-tar1

MDNGSSGLLDVNTSQAELTSCATVRSPACRIFLYAFLSVAIVCTVVGNFLVVLSIAYFKQLQSPTN  
SFVMSLAVADCLVGLLVMPYSMIRTVEGCWYFGVLFCLHSSLDVMLCTASIFHLSCIAFDRIYAVC  
NPLLYSLKMPHSRVALIIVVCWAVPMLISFGPIMLDLHIAGVDVILPKDVCVFLVNRVYAVMASLVA  
FYLPMAIMLVAYWKIFKAAKRQARQISAMESQMAAGVGKDSKKQRHRNAMKREKAAKTLGIIMGV  
FLIFWMPFFFTVNIIVDPFIEYSTEVEVVDIFLWLGYINSSLNPFYGFNRSFRAFLMFMGCRVCLP  
GSSPGMELSHTRKDANERADQP\*

>Lo-tar1

MANISEWLDSMNSSGYTFYEPICPWRSRSSRIILYIFIIAGIICTVFGNFLVVLSIAYFKQLQSPTN  
SFVMSLAVADFLVGLIVMPYSMIRTIEGCWYFGPVFCEIHSSLDVMLCTASIFHLSCIAFDRIYAVC  
NPLVYGFKMSKTRVTLIIITCWVPLLIISFAPILLGLHKLGIETKLPHDVCYFLVNQVYAITASFVA  
FYLPFIMLVAYWKIYKAAKRQAMQINAVENQMTIQNGAVNSTKKQKQRNSMKRERKAAKTLGIIMG  
AFLIFWLPFFFTTNIIVDPFIEYQTDMIWEVFLWLGYVNSSLNPFYGFNRSFRAFFMIIGCKICL  
PGSPSIDLSNTKKEGNERTIS\*

>Lw-tar1

MIMGIHLERMCLVYHQVEQHGLLEWSNISLDADFEACATLRSSGSRVALYVFI IAGIVCTVVGNFL  
VVLAIAYFKQLQCPTNYFVMSLAVADFLVGLVVMPIYSMVRTVEGCWYFGPTFCHLHSSLDVMLCTAS  
IFHLSCIAFDRIYAVCNPLVYSFKMSLKRVGLLIIVVCWAVPFLISFGPILLGLHKLGVDPVLPEN!  
CIFLVNRVYAVMASLVAFYLPMTMLVAYWKIYKAAKRQAMQISAMESQMAAGVGKDSKKQKHRNS  
IRRERKAAKTLGIIMGVFLFWLPFFFTVNIIVDPFIEYGTAGVIWDVFLWLGYVNSSLNPFYGFNRS  
FRAFLMIMGCRICLFGTAQGMDLSHSHKRVVSAQTTSRL\*

>Mc-tar1

MDNSTLGWLGDNTSLQLELQSC TLLRHQVSRIFLYAFLSVGI ICTVVGNFLVVLSIAYFKQLQSPT  
NCFVMSLAVADCLVGLVVMPIYSMIRTVEGCWYFGSLFCRxxxFNRSFRAFLMFMGCRVCLPGSSPG  
MELSHTRKEANECAEQS

>Mim-tar1

MDNGSLGLLDVNTSQAELTSCATVRNQACRIFLYAFLSVAIVCTVVGNFLVVLSIAYFKQLQSPTN  
SFVMSLAVADCLVGLLVMPYSMIRTVEGCWYFGVLFCLHSSLDVMLCTASIFHLSCIAFDRIYAVC  
NPLLYSLKMPRSRVALIIVVCWAVPMLISFGPIMLDLHIAGVDIILPKDVCVFLVNRVYAVMASLVA  
FYLPMAIMLVAYWKIFKAAKRQARQISAMESQMAAGVGKDSKKQRHRNTMKRERKAAKTLGIIMGV  
FLIFWMPFFFTVNIIVDPFIEYSTEVEVVDIFLWLGYINSSLNPFYGFNRSFRAFLMFMGCRVCLP  
GSSPGMELSHTRKEANERADQP\*

>Moa-tar1

MNNSNLGLLGDANISLQTELOQSC T TLRNQASRIFLYTFLSLGIVCTVVG NFLVVL S IAYFKQLQSPT  
NSFVMSLAVADCLVGLVVM PYSMVRTVEGCWHFGTLFCQLHSSLDVMLCTASIFHLSCIAFD RYYAV  
CNPLVYSLKMSHGRVALLIIVCWA V PMLISFGPIMLELHIADV DILFSKD ICVFLVNRIYAVMASLV  
AFYLPMAIMLVAYWKIFKAAKRQARQISAI ESQMAAGVGKDS SSKQRHRNTIKREKKA AKTLGI IMG  
VFLIFWMPFFFTVNI VDPFIEYSTE GIVWDIFLWLGYMNSSLNPFLYGF FNRSFHKAFLMFMGCRVCL  
PGSFPGMELSHTRKEANEHADQP\*

>Mom-tar1

MGGLTTFLLIWGLRGLLRKLF EISHFIKKLSFTTVCDFRDKTMDNSSLGFPADDKISPQTE LKSCS  
TLRNEASRIFLYTFLSVGI ICTVVG NFLVVL S IAYFKQLQSPTNSFVMSLAVADCLVGF LVM PYSMI  
RTVEGCWYFGVLF CRLHSSLDVMLCTASIFHLSCIAFD RYYAVCNPLLYSLKMSRSRIALLV LICWA  
VPMLISFGPIMLDLHISGVEVQLPIDVCVFLVNRIYAVIASLVAFYLPSSIMLVAYWKIFKAAKRQA  
MQISAMESQMAAGVGKDS SSKQRHRNTMKRERKAAKTLGI IMGVFLIFWMPFFFTINIVDPFIDYSTE  
LVVWDVFLWLGYINSSLNPF LYGF FNRSFRKAFLMFMRCRVCLPGSSPGMELSHTRKEAN\*

>Ms-tar1

MDNSSLGLLGDVNVNTSLKIELQSC T TLRNQASRIFLYAFLSVGIVCTVVG NFLVVL S IAYFKQLQS  
PTNSFVMSLAVADCLVGLLVMPYSMIR TIEGCWYFGVLF CRLHSSLDVMLCTASIFHLSCIAFD RYY  
AVCNPLLYSVKMSRSRVALLIIVCWA V PMLISFGPIMLDLHIAGVDVLLPEDVCVFLVNRIYAVMAS  
LVAFYLPMAIMLVAYWKIFKAAKRQARQISAMESQMAAGVGKDS SSKQRHRNTMKRERKAAKTLGII  
MGVFLIFWMPFFFTVNI VDPFIEYSTE VVWDIFLWLGYINSSLNPF LYGF FNRSFRRAFLMFMGCRV  
CLPGSSPGMELSHTRKEANERADQP\*

>Mz-tar1

MDNSTLGWLGD DNTSLQLELQSC T LLRHRVSRIFLYAFLSVGI ICTVVG NFLVVL S IAYFKQLQSPT  
NCFVMSLAVADCLVGLVVM PYSMIR TVEGCWYFGSLFCRIHSSLDVMLCTASIFHLSCIAFD RYYAV  
CNPLVYSLKMSHRRVALLIIVCWLVPILISFGPIMLDLHVAGVDMVIPKDL CVFLVSRIYAVMASLV  
AFYLPMAIMLVAYWKIFKAAKRQARQISAMESQMAAGVGKDS SSKKRHRNAMKREKKA AKTLGI IMG  
VFLIFWMPFFFTVNI VDPFIEYSTE VVLWDLFLWLGYINSSLNPF LYGLFNRSFRRAFLMFMGCRVCL  
PGSSPGMELSHTRKEANECAEQS\*

>Nb-tar1

MDNSTLGWLGD DNTSLQLELQSC T LLRHRVSRIFLYAFLSVGI ICTVVG NFLVVL S IAYFKQLQSPT  
NCFVMSLAVADCLVGLVVM PYSMIR TVEGCWYFGSLFCRIHSSLDVMLCTASIFHLSCIAFD RYYAV  
CNPLVYSLKMSHRRVALLIIVCWLVPILISFGPIMLDLHVAGVDMLIPKDL CVFLVSRIYAVMASLV  
AFYLPMAIMLVAYWKIFKAAKRQARQISAMESQMAAGVGKDS SSKKRHRNAMKREKKA AKTLGI IMG  
VFLIFWMPFFFTVNI VDPFIEYSTE VVLWDLFLWLGYINSSLNPF LYGLFNRSFRRAFLMFMGCRVCL  
PGSSPGMELSHTRKEANECAEQS\*

>Nf-tar1

MDNNSLQWIQDLNASLQNELQSC STLRNQISRIFLYTFLSLGVVSTVVG NFLVVL S IAYFKQLQSPT  
NYFVMSLAVADCLVGLLVMPYSMMRTVEGCWYFGALFCKLHSSLDVMLCTASIFHLSCIAFD RYYAV  
CNPLVYSLKMSPNRVALLIIVCWV I PMLISFGPIMLDLHTADVGIQIPENVC MFLVSRVYAIMASSV  
AFYLPVVMVLVAYWKIFKAAKRQAKQISAMESQMASGVGKDS SSKKRHRNTMKREGKAAKTLGI IMG

VFIIFWMPFFTLNIVDPFTDYSTEVIWDVFLWLWLGYNSSLNPFYGLFNSCFRAFLLLIGCRVCL  
PGISSGMELSHSKKETKQ\*

#### >Ol-tar1

MCVLDRLFHLTMDNSSLDWGECTNRSELESCTTMRNQFSRIFLYSFFTIGIVSTVVGNFVLSIAYF  
KQLQSPTNCFVMSLAVADCFVGLVVMPIYSMIRTVEGCWYFGSLFCKLHSSLDVMLCTASIFHLSCIA  
FDRFYAVCNPLIYSLKMSQSRVALLITICWAVPMLISFGPIMLDLHIAGVDIRIPEDLCVFLVSRIY  
AVMASLVAFYLPMAIMLVAYWKIFKAAKRQALQISAMESQMAAGVGKDSKKRWHRITMRERKAAK  
TLGIIMGVFLIFWMPFFTLNIVDPFIGYTTTEVVVDIFLWLWLGYNSSLNPFYGLFNRSFRAFLMF  
IGCRVCLPGSSPGMELSQRKEANDCTD\*

#### >On-tar1

MDNSTLGWLGDNTSLQLELQSCITLLRHQVSRIFLYAFLSVGIICTVVGNFVLSIAYFKQLQSPT  
NCFVMSLAVADCLVGLVVMPIYSMIRTVEGCWYFGSLFCRIHSSLDVMLCTASIFHLSCIAFDRYAV  
CNPLVYSLKMSHRVALLIIVCWLVPILISFGPIMLDLHVAGVDMLIPKDLVFLVSRIYAVMASLV  
AFYLPMAIMLIAYWKIFKAAKRQARQISAMESQMAAGVGKDSKKRHRNAMKREKAAKTLGIIMG  
VFLIFWMPFFTVNIVDPFIEYSTEVLWDLFLWLWLGYNSSLNPFYGLFNRSFRAFLMFMGCGVCL  
PGSSPGMELSHTRKEANECAEQS\*

#### >Pa-tar1

MDNSSLGMHDYANTSLQIELQSCITSSKNQVSRIFLYSFFSIGIVCTVVGNFVLSIAYFKQLQSPT  
NSFVMSLAVADCLVGLVVMPIYSMIRTVEGCWYFGSLFCQLHSSLDVMLCTASIFHLSCIAFDRYAV  
CNPLVYSLKMSHSRVALLIIVCWLVPILISFGPIMLDLHIAGVNILLPKNVCVFFVNRIYAVMASLV  
AFYLPMAIMLVAYWKIFKAAKRQARQISAMESQMAAGVGKDSIKKQRYRNTMKREKAAKTLGIIMG  
VFLIFWLPFFTVNIVDPFIEYSTEVIWDICVWLWLGYNSSLNPFYGLFNRSFRAFLMFIGCRVCL  
PGSFPGMDLSHTRKEANECIDQPS\*

#### >Pem-tar1

MGKKSCLKLLDFSLCSSRFAIMANQTLEMPESLNSTNLAELDSCSTLRNRTFQLQVFLYTFLSLVI  
CTVVGNSLVLSIAYFKRLQSPTNFFVLSLAVADCLVGLVVMPIYSMVRTIEGCWIFGAVFCQIHSSL  
DVMLCTASIFHLSCIAFDRYAVCNPLCYSLKMSNNRVFLIVICWVISLLISFGPVMLELHVASTD  
VQIPKDCVFMVNQIYAVLASVVSFYLPMLTMLLAYWKIYKVARRQARQISAMEGQMGKDTSKKQRH  
RNAMKREGKAAKILGIVMGVFLLEFWMPFFTINVVDPIGYRTEAVVWDVFLWLWLGYNSSLNPLLYGF  
FNRSFRAFLMFIGCRVCLHQPLSWVELSQTRRDLPNERN\*

#### >Pf-tar1

MENSSLAWPGNDNASLPIELPSCATLRSQISRISLYAFLSVGTGCTVVGNFVLSISYFKQLQSPT  
NSFVLSLAVADCLVGLLVMPIYSMIRTVEGCWYFGPLFCRLHSSLDVMLCTASIFHLSCIAFDRYAV  
CNPLVYSLKMSNSHVALLIAICWTVPMLISFGPIMLDLHVADVDIFIPSDVCVFLVSRVYAVMASLV  
AFYLPMAVMLVAYWKIFKAAKRQAKQISAMESQMAAGVGKDSKKRHRNTMKREGKAAKTLGIIMG  
VFLIFWMPFFTVNIVDPFIEYTTTEGVVWDVFLWLWLGYNSSLNPFYGLFNRCFRAFLMFLSCRVCL  
PGISSGMELSHSKKEKN\*

>Pi-tar1

MENSSLAWPGNDNASLPIELPSCATLRSQISRISLYAFLSVGTGCTVVGNFLLVLSISYFKQLQSPT  
NSFVLSLAVADCLVGLLVMPFSMIRTVEGCWYFGPLFCRLHSSLDVMLCTASIFHLSCIAFDRIYAV  
CNPLVYSLKMSNSHVALLIAICWTVPMLISFGPIMLDLHVADVDIFIPSDVCVFLVSRVYAVMASLV  
AFYLPMAVMLVAYWKIFKAAKRQAKQISAMESQMAAGVGKDSKKKRHRNTMKREGKAAKTLGIIMG  
VFLIFWMPFFTVNIVDPFIEYTTTEGVVWDVFLWLGYINSSLNPFYGGFFNRCFRAFLMFLSCRVCL  
PGISSGMELSHSKKEKN\*

>Po-tar1

MDNNSLGFLREANTSLQIELQSCATFRNQVSRI FVYAFLSVGIAC TVVGNFLLVLSIAYFKQLQSPT  
NSFVMSLAVADCLVGLLVMPYSMIRTVEGCWYFGALFCQLHSSLDVMLCTASIFHLSCIAFDRIYAV  
CNPLIYSLKMSHNRVAFLIVVCWAVPMLISFCPIMLDLHIAGVDILLPKDVCVFLVNRIYAVMASLV  
AFYLPMAIMLIAYWKIFKAAKRQARQISAMESQMAAGVGKDSKKQRHRKAMKREKAAKTLGIIMG  
VFLIFWMPFFTVNIVDPFIGYSTEVVVWDVFLWLGYINSSLNPFYGGFFNRSFRAFLMFIGCRVCL  
PGSSPGMELSHTRKEANERAHQP\*

>Pom-tar1

MENSSLAWPGNDNASLPIELPSCATLRSQISRIFLYAFLSVGTGCTVVGNFLLVLSISYFKQLQSPT  
NSFVLSLAVADCLVGLLVMPFSMIRTVEGCWYFGPLFCRLHSSLDVMLCTASIFHLSCIAFDRIYAV  
CNPLVYSLKMSNSHVALLIAICWTVPMLISFGPIMLDLHVADVDIFIPSDVCVFLVSRVYAVMASLV  
AFYLPMAVMLVAYWKIFKAAKRQAKQISAMESQMAAGVGKDSKKKRHRNTMKREGKAAKTLGIIMG  
VFLIFWMPFFTVNIVDPFIEYTTTEGVVWDVFLWLGYINSSLNPFYGGFFNRCFRAFLMFLSCRVCL  
PGISSGMELSHSKKEKN\*

>Pp-tar1

MENSTEWSNVSLDADFEACATLRSSGSRAALYVFIVAGI ICTVVGNFLLVLA IAYFKQLQCPTNYFV  
MSLAVADFLVGLLVMPYSMVRTVEGCWYFGPTFCHLHSSLDVMLCTASIFHLSCIAFDRIYAVCNPL  
VYSFKMSLKRVGLLIVVCWAVPFLISFGPIFLGLHKLGVDPLENCIFLVNRYAVMASLVAFYL  
PMVTMLVAYWKIYKAAKRQAMQISAMESQMAAGVGKDSKKQKHRNSIKREKAAKTLGIIMGVFL  
FWLPFFTVNIVDPFIEYGTAGVIWDVFLWLGYVNSSLNPFYGGFFNRSFRAFLMIMGCRICLYGTA  
QGMDLSHSKRDA SERTENQ\*

>Pr-tar1

MENSSLAWPGNYNTSLPVELPSCATLRSQISRIFLYAFLSVGTGCTVVGNFLLVLSISYFKQLQSPT  
NSFVLSLAVADCLVGLLVMPFSMIRTVEGCWFFGPLFCRLHSSLDVMLCTASIFHLSCIAFDRIYAV  
CNPLVYSLKMSNSHVALLIAICWTVPMLISFGPIMLDLHVADVDIFIPSDLCVFLVSRVYAVMASLV  
AFYLPMAIMLVAYWKIFKAAKRQAKQISAMESQMAAGVGKDSKKKRHRNTMKREGKAAKTLGIIMG  
VFLIFWMPFFTVNIVDPFIEYTTTEGVVWDVFLWLGYINSSLNPFYGGFFNRCFRAFLMFLSCRVCL  
PGISSGMELSHSKKEKN\*

>Ps-tar1

MANHTLEMPSLNSTNLAE LDCSMLRTRTSQVFLYTFLSLVI ICTVVGNSLVVLSIAYFKRLQSPT  
NFFVLSLAVADCLVGLLVMPYSMVRTIEGCWIFGAVFCQIHSSLDVMLCTASIFHLSCIAFDRIYAV  
CNPLCYSLKMSNNRVVFLIMICWVISLLISFGPVMLELHVASTDVQIPKDCSVMVNQIYAVLASVV  
SFYLPMLTMLLAYWKIYKVARRQARQISAMESQMGKDTSKQRHRNAMKREGKAAKILGIVMGVFL

FWMPFFTINVVDPFIGYRTEAVVWDVFLWLGLYLNSSLNPLLYGFFNRSFRAFLMFIGCRVCLHQPL  
SWVELSQTRRDLNERN\*

### >Pun-tar1

MDNSTLGWLGDNTSLQLELQSCATLRNQVSRIFLYAFLSVGI ICTVVG NFLVVL SIAYFKQLQSPT  
NCFVMSLAVADCLVGLVVM PYSMIRTVEGCWYFGSLFCRIHSSLDVMLCTASIFHLSCIAFDRIYAV  
CNPLVYSLKMSHRRVALLI AVCWLVPI LISFGPIMLDLHVAGVDMVIPKDL CVFLVSRIYAVMASLV  
AFYLPMAIMLVAYWKI FKA AKRQARQI SAMESQMAAGVGKDS SSKKRHRNAMKRERKAAKTLGI IMG  
VFLIFWMPFFT VNIVDPFIEYSTE VVLWDLFLWLGYINSSLNPF LYG LFNRSFRAFLMFMGCRVCL  
PGSSPGMELSHTRKEANECAEQS\*

### >Py-tar1

MDNGSLGFLGEANTSLQIELQSCATLRNQVSRIFLYAFLSIAITCTVVG NFLVVL SIAYFKRLQSPT  
NSFVMSLAVADCLVGLVVM PYSMIRTVEGCWYFGAHFCQLHSSLDVMLCTASIFHLSCIAFDRIYAV  
CNPLIYSLKMSNNRVAFLI VVCWAVPLLI SFCPIMLDLHIAGVDILLPKDVCVFLVNRIYAVMASLV  
AFYLP MGIMLIAYWKI FKA ANRQARQI SAMESQMAAGVGKDS SSKQRHRNAMKRERKAAKTLGI IMG  
VFLIFWVPPFFT VNIVDPFIEYSTE GVVDVFLWLGYINSSLNPF LYG LFNRSFRAFLMFIGCRVCL  
PGSSPGMELSHTRKEANERAHQP\*

### >Pyn-tar1

MANSSEWLEDSNTSFVGD FEP CATVRSPSTRVAMYTFI I VGI FCTVVG NLLVVL AIAYFKQLQSHTN  
SFVMSLAVADFLVGLVVM PYSMVRTIEGCWHFGATFCQLHSSLDVMLCTASIFHLSCIAFDRIYAVC  
NPLVYTFKMSRSRVALLI VVCWAVPLLI SFGPILLGLHKLGVDISLPENVCVFLVNRVYAVIASLVA  
FYLPVMSMLVAYWKI YKAAKRQAMQI SAMEAQMAAGVGKDS SSKQKHRNSMRERKAAQT LGI IMGV  
FLIFWLPPFFT VNIVDPFIEYTTTGV IWDVFLWLGYVNSSLNPF LYG LFNRSFRAFLMIMGCRICLP  
GSASGMDLSHSRKDANERTENQ\*

### >Sa-tar1a

MENSSEWSNISLDSDFEPCATLRSSGSRVALYVFI IAGIVCTVVG NFLVVL AIAYFKQLQCPTNSFV  
MSLAVADFLVGLVVM PYSMVRTVEGCWYFGPNFCHLHSSLDVMLCTASIFHLSCIAFDRIYAVCNPL  
VYSFKMSRKRVG LLI VVCWAI PFLI SFGPILLGLHKLGM DVPLPENMCIFLVNRIYAVMASLVAFYL  
PMVTMLVAYWKI YKAAKRQAMQI SAMEAQMAAGVGKDS SSKQKHRNSIRERKAAKTLGI IMGVFL  
FWLPPFFT VNIVDPFIEYGTAAVIWDVFLWLGYVNSSLNPF LYG LFNRSFRAFLMIMGCRICLHGKA  
QGMDLSHSRKDANERTDNQ\*

### >Sa-tar1b

MENSSEWSNISLDSDFEPCATLRSSGSRVALYVFI ITGIACTVVG NFLVVL AIAYFKQLQCRTNSFV  
MSLAVADFLVGLVVM PYSMVRTVEGCWHFGPTFCHLHSSLDVMLCTASIFHLSSIAFDRIYAVCNPL  
VYSFKMSRERVG LLI VVCWAI PFLIAFGPILLGLHKLGM DVPLPENVCIFLVNRIYAVMASLVAFYL  
PIVTMLVAYWKI YKAAKRQVMQI SAMEAQMAADV GKDS SSKQKHRNSIRERKAAKTLGI IMGVFL  
FWLPPFFT VNIVDPFIEYGTAAVIWD

### >Sea-tar1

MDNGTLG LLDANTSLHIESCTTLRNQVSRIFLYAFLSVGI VCTVVG NFLVVL SIAYFKQLQSPTNS  
FVMSLAVADCLVGLVVM PYSMIRTVEGCWYFGVLFQLHSSLDVMLCTASIFHLSCIAFDRIYAVCN

PLVYSLKMSRSRVALLIVVCWAVPMLISFGPIMLDLHVAGVDILLPKDVCVFLVNRIYAVMASMVAF  
YLPMAIMLIAYWKIFKAAKRQAMQISAMESQMAAGVGKDSKKKRRHRNTMKRERKAAKTLGIIMGVF  
LLFWMPFFFTVNIIVDPFIEYSTEVVVWDIFLWLGYINSSLNPFYGFNRYFRRFLMFMGCRVCLPG  
TSPGMELSHTRKEANERTDQP\*

### >Sem-tar1

MDNGTLGLLGDANTSLHIESCTTLRNQVSRIFLYAFLSVGIVCTVVGNFVLSIAYFKQLQSPTNS  
FVMSLAVADCLVGLVMPYSMIRTVEGCWFFGVLFCQLHSSLDVMLCTASIFHLSCIAFDRIYAVCN  
PLVYSLKMSRSRVALLIVVCWAVPMLISFGPIMLDLHVAGVDILLPKDVCVFLVNRIYAVMASMVAF  
YLPMAIMLIAYWKIFKAAKRQAMQISAMESQMAAGVGKDSKKKRRHRNTMKRERKAAKTLGIIMGVF  
LLFWMPFFFTVNIIVDPFIEYSTEVVVWDIFLWLGYINSSLNPFYGFNRYFRRFLMFMGCRVCLPG  
TSPGMELSHTRKEANERADQP\*

### >Ser-tar1

MDNGTLGLLGDANTSLHIESCTTLRNQVSRIFLYAFLSVGIVCTVVGNFVLSIAYFKQLQSPTNS  
FVMSLAVADCLVGLVMPYSMIRTVEGCWFFGVLFCQLHSSLDVMLCTASIFHLSCIAFDRIYAVCN  
PLVYSLKMSRSRVALLIVVCWAVPMLISFGPIMLDLHVAGVDILLPKDVCVFLVNRIYAVMASMVAF  
YLPMAIMLIAYWKIFKAAKRQAMQISAMESQMAAGVGKDSKKKRRHRNTMKRERKAAKTLGIIMGVF  
LLFWMPFFFTVNIIVDPFIEYSTEVVVWDIFLWLGYINSSLNPFYGFNRYFRRFLMFMGCRVCLPG  
TSPGMELSHTRKEANERADQP\*

### >Ses-tar1

MDNGTLGLLGDANTSLHIESCTTLRNQVSRIFLYAFLSVGIVCTVVGNFVLSIAYFKQLQSPTNS  
FVMSLAVADCLVGLVMPYSMIRTVEGCWFFGVLFCQLHSSLDVMLCTASIFHLSCIAFDRIYAVCN  
PLVYSLKMSRSRVALLIVVCWAVPMLISFGPIMLDLHVAGVDILLPKDVCVFLVNRIYAVMASMVAF  
YLPMAIMLIAYWKIFKAAKRQAMQISAMESQMAAGVGKDSKKKRRHRNTMKRERKAAKTLGIIMGVF  
LLFWMPFFFTVNIIVDPFIEYSTEVVVWDIFLWLGYINSSLNPFYGFNRYFRRFLMFMGCRVCLPG  
TSPGMELSHTRKEANERADQP\*

### >Sf-tar1

MANSSQWWAASEGPNASLHGDVEPCVPWRSPGSRVLYALLAAGIVSTVVGNFVLSIAYFKQLQS  
PTNSFVLSLAVADFLVGLVMPYSMVRTVEGCWYFGSVFCEVHSSLDVMLCTTSIFHLSCIAFDRIY  
AVCNPLVYALKMSRTRVALLIVTCWVLPMLISFGPIMLGLHKANMEVPPEDSCSFLVNRVYAVTAS  
LVAFYLPMATMLVAYWKIYKAARRQAMQISAMESQMTTSQGTDAGRKQKQRNSMRERKAAKTLGFI  
MGAFLFWLPFFTTNIIDPFIEYCTAGVIWDIFLWLGYANSSLNPFYGFNRSFRRAFFMIMGCRI  
CLPGSPPSADLSYTKRDGQDHPEN\*

### >Sf-tar2

NLTEDNFSNCTARHCNSTAMKVCLLLVLFVIAISATLGNLLAVVPVAYFRPLHTPTNVFIVSLAVAD  
FLVGLALVPLSLVRSVARWFRFPRTAHVLLDVTFCASIFDLCCIALDRYLAVRNPLRYVLSVL  
VVTGLLRAHTLSEKPGAQAPATCTLMVNPPTARLPLTPSFILPTSMVTAYWKIFRAAQKQQRIS  
TMENQVRQMDQDQNRSEAQTSLSARLEMKAVKTLGIIMGAYLLCWLPPFFSTNTVYPLHGYHVSSWTI  
ELVLRLLGYANSALNPILYAFFKTTFRQAFAILGCGSHGLEQQNSNLSP\*



### >Sg-tar1

MENSSEWSNISLNTDFEPCATLRSSGSRVALYVFI IAGIVCTVVGNFLVVLAIAYFKQLRCPTNSFV  
MSLAVADFLVGLVVMPIYSMVRTVEGCWYFGPNFCHLHSSLDVMLCTASIFHLSCIAFDRIYAVCNPL  
VYSFKMSRKRVGLLIVVCWAI PFLISFGPILLGLHKLGM DIPLPENMCIFLVNRYAVMASLVAFYL  
PMVTMLVAYWKIYKAAKRQAMQISAMEAQMAAGVGKDSKKQKHRNSIRREKAAKTLGI IMGVFL  
FWLPFFFTVNI VDPFIEYGTAAVIWDVFLWLGYVNSSLNPFYGFNRSFRAFLMIMGCRICLHGTA  
QGMDLSH SKRDANERTDNQ\*

### >Sh-tar1

MANRTMEIPGPFNSTDLLELDCSMLRNYTSQIFLYVFLSFVIVCTVVGNLVLVLSIGYFKRLQSPTN  
FFVLSLAVADCLVGLIVMPIYSMVRTIEGCWLFGLFCQIHSSLDVMLCTSSIFHLSCIAFDRIYAVC  
NPLCYSLKMSNRVIFLIISCWGVSSLISFGPVMLELHVAASADIEIPKDCVFFVNPIYAVLASV  
SFYLPMLTMLLAYWKIYKVARQARQISAMESQMGKDTSKKQRHRNAMKREGKAAKILGIVMGVFL  
FWMPFFFTNVVDPFIGYRTEAVVWDVFLWLGYLNSSLNPLLYGLFNRSFRAFLMFIGCRVCLHQPL  
SWVELSQTKKDVQNERN\*

### >Sn-tar1

MDNGTLGLLGDANTSLHIESCTTLRNQVSRIFLYAFLSVGIVCTVVGNFLVVLAIAYFKQLQSPTNS  
FVMSLAVADCLVGLVVMPIYSMIRTVEGCWFFGVLFCQLHSSLDVMLCTASIFHLSCIAFDRIYAVC  
PLVYSLKMSRSRVALIIVCWAVPMLISFGPIMLDLHVAGVDILLPKDVCVFLVNRIYAVMASMVA  
YLPMAIMLIAYWKIFKAAKRQAMQISAMESQMAAGVGKDSKKKRRHRNTMKRERKAAKTLGI IMGV  
LLFWMPFFFTVNI VDPFIEYSTEVEVWDIFLWLGYINSSLNPFYGFNRYFRAFLMFMGCRVCLPG  
TSPGMELSHTRKEANERADQP\*

### >Sr-tar1a

MENSSEWSNISLDSDFEPCATLRSSGSRVALYVFI IAGIVCTVVGNFLVVLAIAYFKQLQCPTNSFV  
MSLAVADFLVGLVVMPIYSMVRTVEGCWYFGPNFCHLHSSLDVMLCTASIFHLSCIAFDRIYAVCNPL  
VYSFKMSRKRVGLLIVVCWAI PFLISFGPILLGLHKLGM DVPLPENMCIFLVNRYAVMASLVAFYL  
PMVTMLVAYWKIYKAAKRQAMQISAMEAQMAAGVGKDSKKQKHRNSIRREKAAKTLGI IMGVFL  
FWLPFFFTVNI VDPFIEYGTAAVIWDVFLWLGYVNSSLNPFYGFNRSFRAFLMIMGCRICLHGTA  
QGMDLSH SKRDANERTDNQ\*

### >Sr-tar1b

MENSSEWSNISLDSDFEPCATLRSSGSRVALYVFI ITGIVCTVVGNFLVVLAIAYFKQLQCPTNSFI  
MSLAVADFLVGLVVMPIYSMVRTVEGCWYFGPTFCHLHSSLDVMLCTASIFHLSCIAFDRIYAVCNPL  
VYSFKMSRERVGLLIVVCWAI PFLISFGPILLGLHKLGM DVPPENVCIFLVNRYAVMASLVAFYL  
PMVTMLVAYWKIYKAAKRQAMQISAMEAQMAAGVGKDSKKQKHRNSIRRESKAAKTLGI IMGVFL  
FWLPFFFTVNI VDPFIEYGTAAVIWDVFLWLGYVNSSLNPFYGFNRSFRAFLMIMGCRICLHGTA  
QGIDL SHSKRDANERTDNQ\*

### >Ss-tar1a

MLTGAICSVLEMSHHTAKSCQNVHIMDVVICILTEQDQAMNNTSLGWPELDGDANLSSLHGDLEDFC  
ATSSRHQASRVILYAFFTAGILCTVVGNFLVVLAIAYYKQLQSPTNSFVMSLAVADCLVGLVVMPIYS  
MVRTVEGCWLF GALFCRVHSSLDVMLCTASIFHLSCIAFDRIYAVCNPLVYHLKMSQGRVAFLIVC  
WAVPLLI SFGPIMLGLHKAGVNMVMPPEDACVFLVNRYAVMASLVAFYLP GMVMLAAYWKIYKAA

KRQAMQISAMESQFSAGVGKDSKKQRHRNAMRRERKAAKTLGIIMGVFLFWLPFFTVNIVDPFID  
YSTAVEVWEFFLWLGYNSSLNPFYLYGFFNRSFRAAFMMIMGCRICLSSSSPGMDLSKESNERKVNQ  
\*

### >Ss-tar1b

MLCVFLTEHDQAMDNTSLGWPELDGDVNLSSF\*GDLEDFCATSSRHQASRVILYAFFTAGIVCTVV  
DNFLVVLAIIVYCKQLQSPTNSFVMSLAVADCLVGLVIMPYSMVCTVEGCWFFGALFCQVHSSLDIML  
CTASIFHLSCIPFNRYAMCNPLVYHLKMSQGRVAFLIVVCWAVPLLIISFGPIMLGLHKAGVDMVPM  
PPEDTCVFLVNRVYTVMASLVAFYLPMGIMLAAYWKIYKAAKRQAMQISAMESQFSAGVGKDSKKQ  
RHRNAMRRERKAAKTLGIIMGVFLFWLPFFIVNIVDPFIDYSIVVEVWEFFLWLGYNSSLNPFY  
GFFNRSFRAAFMMVMGCRICLSSSSPGLDLPKESNERKVNQ\*

### >Ss-tar12

MWMAGVLSHGVLSSGNSSTTDYINLTDGHHNESTSALLRSTAFKVCVLCVLIPIPVFAILGNLLI  
VASVGRFRNIQMPTNSFIVSLAMADLLVAVLVMPFSLVRSVDTWWFGRNFCVAHFLLDMTLCTSSIF  
NLSCVALDRYVAVCDPLHYPTRMSPRRVTMLLLLSWLLPLLISSLCVSLSMYYLTPPTGYRGTQQES  
PTCVAQIHTPYAVADSTVCFPIPVVFMFLFAYGRIFMVAQRQARWIHAMENHSGQLHMDQNPTREDPA  
RPDPARPDPARSDPARRVQARLGGFSIRKENKAARTLGLIMGVFLMCWLPYFSINIAFPLWGDRISP  
IVLEASMWLGYANSSLNPFIIYAFFNKDFRHAFAVAILGCEILGRQIRGCLVSTQEISRQVHTVVTTLET  
ISK\*

### >Stp-tar1

MDNSSLGWLEDANTSLQIELQPCSTLRNQISRIFLYAFLSVGIVCTVVGNFLVVLISIAYFKQLQSPT  
NSFVMSLAVADCLVGLVMPYSMIRTVEGCWFFGSLFCQLHSSLDVMLCTASIFHLSCIAFDRIYAV  
CNPLVYSLKMSSSRVALLIAICWAVPMLISFGPIMLDLHVADVDIILLPKDVCVFLVSRIYAVMASLV  
AFYLPMAIMLVAYWKIFKAAKRQARQISAMESQMAAGVGKDSKKRRHRNTMKRERKAAKTLGIIMG  
VFLFWMPFFTVNIVDPFIDYSTEVVVWDIFLWLGYNSSLNPFYLYGFFNRSFRAAFMLFMGCRVCM  
PGSSPGMELSHTRKEANECADQP\*

### >Tn-tar1

MDNSSFELFGVTNSSLSETPSCVTLRHLVSRIFLYTFFSFGIVCTVVGNFLVVLISIAYFKQLQSPT  
NTFVMSLAVADCLVGLLVMPYSMIRTMEGCWYFGLLFCRLHSSLDVMLCTASIFHLSCIAFDRIYAV  
CNPLLYSLKMSHGRVALLIFVCWSVPMLISFGPIMLDLHVSGVDIELPIDVCVFLVNRVYAVTASVV  
AFYLPVIMLIAYWKIFKAAKRQAMQISAMESQMAAGVGKDSKKRRHRNNMKRERKAAKTLGIIMG  
VFLIFWMPFFTVNIVDPFIEYSTDGVVWDIFLWLGYNSSLNPFYLYGFFNRSFRKAFMLMLIGCRVCL  
PGSSPGMELSHTRREAN\*

### >To-tar1

MDNSSLGFHYDANTSLQIELQSCSTLRNQASRIFLYGFFSIGIVCTVVGNFLVVLISIAYFKQLQSPT  
NSFVMSLAVADCLVGLLVMPYSMIRTVEGCWYFGDLFCQLHSSLDVMLCTASIFHLSCIAFDRIYAV  
CNPLVYSLKMSRNRVALLIVICWAVPMLISFGPIMLDLHIAGVDIILLPNNVICFLVNRVYAVMASLV  
AFYLPMAIMLVAYWKIFKAAKRQARQISAMESQMAAGVGKDSKKQRHRNTMKREGKAAKTLGIIMG  
VFLIFWMPFFTVNIVDPFIEYSTEVVWDIFLWLGYNSSLNPFYLYGFFYRSFRAAFMLFMGCKVCL  
PGSSPGMDLSHTKKEENEHADQP\*

>To-tar12

MIHIPGVNTSDNNSLTDDGSDSALFHSNTIKVCVLCLLLPIPIFAIMGNLLIMA AVARFQSLRTPTN  
AFVVSLAVADFLVAVLVMPFSLVRSIDGWYFGHCFCQAHFLDMSFCTSSIFNLSCVALDRYIAVCD  
PLHYLSRMSPKRVALLLLLLWCWILPLIISCLCVSFGMYTQSPPAESSVTQQDTQTCQASFHIPYAF  
TSAISFFIPTGFMLFAYGKIFMAAQRQARWIHAIEHHTGQLQMNQSSMRTDPTRRVHVERYSLK  
KAAKTLGLIMGVFLLCWLPFFCVNVVHPLKGYINPLVLEASMWLGYANSSLNPFYALFNKNYRHA  
FVTMLGCGSLGRHLRAGLEYSHFFRQTHTVVTLETISR\*

>Tr-tar11

MNNSSESSPSETESCLTLRHPASRILLYTFFSVGIICTVVGNNLLVVLSIAYFKQLQSPTNTFVMSL  
AVADCLVGLLVMPYSMIRTVEGCWYLGLLFCRLHSSLDVMLCTASIFHLSCIAFDRIYAVCNPLLYS  
LRMHSRVALLIFVCWSVPMLISFGPIMLELHIAGVDIQLPKDVCMLVNVQVYAVTASVVAFYFPSA  
IMLIAYWKIFKAAKRQAMQISAMESQMAAGVGKDTSRKWQHRNNMRRERKAAKTLGIIMGVFLIFWM  
PFFTTNIVDPFIEYGTTEGVVWDVFLWLGYINSSLNPFYGFNRSFRKAFLMLMGCRVCLTGSSAGM  
ELSHTPREAN\*

>Xc-tar11

MENSSLAWPGNDNASLHIELPSCATLRSQISRIFLYAFLSVGTGCTVVGNNFLVVLSISYFKQLQSPT  
NSFVLSLAVADCLVGLLVMPFSMIRTVEGCWYFGSLFCRLHSSLDVMLCTASIFHLSCIAFDRIYAV  
CNPLVYSLKMSNSHVALLIAICWTVPMLISFGPIMLDLHVADVDIFIPSDLCVFLVSRVYAVMASLV  
AFYLPMAIMLVAYWKIFKAAKRQAKQISAMESQMAAGVGKDSKKKRHRNTMKREGKAAKTLGIIMG  
VFLIFWMPFFTVNIVDPFIEYTTTEGVVWDVFLWLGYINSSLNPFYGFNRCFRRAFLMFLSCKVCL  
PEISSGMELSHSKKEKN\*

>Xm-tar11

MENSSLAWPGNDNTSLHIELPSCATLRSQISRIFLYAFLSVGTGCTVVGNNFLVVLSISYFKQLQSPT  
NSFVLSLAVADCLVGLLVMPFSMIRTVEGCWYFGSLFCRLHSSLDVMLCTASIFHLSCIAFDRIYAV  
CNPLVYSLKMSNSHVALLIAICWTVPMLISFGPIMLDLHVADVDIFIPSDLCVFLVSRVYAVMASLV  
AFYLPVIMLVAYWKIFKAAKRQAKQISAMESQMAAGVGKDSKKKRHRNTMKREGKAAKTLGIIMG  
VFLIFWMPFFTVNIVDPFIEYTTTEGVVWDVFLWLGYINSSLNPFYGFNRCFRRAFLMFLSCKVCL  
PEISSGMELSHSKKEKN\*

# TAAR receptors class II from bony fish and cartilaginous fish species

## Cartilaginous fish class II TAAR

### *Callorhinchus milii*

#### >Cm-taarIIa

MINSTSGEKVENVQYCFEFVNDSCPKAIRFIPTCTMLYIFMV!  
SIVITVLGNQMVTISISHFRQLHTPTNCLVLSLAIADFLVGLLVMPYSMLRLIETC\*YFGNLFCK  
IHSSLDMMMSTASIFHLFCIAIDCYAVFDPLLYTTKITPPVITTFVAVSWVVPTIFAFGVVFSE  
INLAGIENLLETSSCMGSCALLFNELSVSSGNRVFIPSIIMLGIYIKRFLVARKHARAIEGVTEK  
NNEGKTNRISRNEKHKPAKTLGLVMGIFLIYVVPFFITTIIDPIINFSTPPIIFDTFVWFGYFNS  
AFNPILYAFFYPWFHKALKLILSCLFSDSDSSTINLFPK\*

#### >Cm-taarIIb

MQFCFEFVNTSCKVIRSAAIYTVTYAVIIISTIIITIVGNLEVIISIAHFKQLQTPTNYFILLLA  
TTHFLIGLIILPYSMVRSVETCWYFGYVFCKIHSSLGMMMLTTA\*IFHLCFIAVDRYNAMCDPLLY  
ITKITLPVLSMFITISWALPRVFAFGIVFSEINLKGMEDYFAAISCHGM!  
VLIFNKQWGLLDPVIAFFAPSLVLVGMNIKIFLVARKHSRVTGNKSNKIHSTKENNTRISCRKEH  
KNTKTLGIVMGVFLICWLPFFIDTIIDAYIKFTTPPVLDVAFVWFGF!  
NSPLNPMIFCFYFWRKALKLILSFKIFNIDSFVSNLFP\*

#### >Cm-taarIIc

MNSINLENSEDLQYCFEFNMSCPKSIRSTTTTTVTMYIFITISIVITILGNSVVMISILHFKQLQT  
PTNYLVLSLAFVDFLMGFFVLPFSMVRVETCWYFGDTCDIHSTLDVVLTTVSIYNLCFIAIDR  
YYAVCEPLLYSIKMTLPMTALIIITLNWLFIIYGSCVFLSEFTKKASGHYRTTISCKGSCIEYRF  
GGHMDALIVLFIPTFIIILGIYLKIYFVQRKHARKIGNMPNNINSKEEINVRVLQTKEKTAANKQG  
VVMGIFVLSWLPFYLSIIINPYLNFATPPILFEAFTWFGFFNSAFNPVLYAFFYPWFRTALKSIL  
TCQILRPESSIMNLFPE\*

### *Leucoraja erinacea*

#### >Le-taarIIa

MNLTYLENSEDVQYCFQYVNASCPRVTRPIAIKATLYLIISLSIFISILGNLVVIASVLHFKQLQ  
TPTNYLVLSLAVVDFLVAIVLPYSMIRSIETCWYFGHVFCIKHSVLEIVLTIVSIYNVCFIAID  
RYAICDPLLYSIKITVPVTFIILSLIWLFAIYYGFNVVFLDFSKKILSDYVPTMACEGSCIAAYA  
KFEGHMDSLIIFFIPILIIILGVNIKIFFVVKCKRGRKIGNLPNNDTGEINKETLHNKEQIAVKNQ  
SAIMGIFTFSWLPFYVNSILNPYFDSLIPPLDDVITWFGFFNSTLNPMPLYAFLYPWYRRVLKLT  
FSCQI

## ***Rhincodon typus***

### **>Rt-taarIIa**

MNSTQIQDKADTEDCFEFVNTSCRKNSQSTAVHVALYMI FVI I V L I T I I S N L L V I I S I L H F R K L Q  
T E T N F L V L S L A V T D F L V G L V L P Y S T I R S V D T C W Y F E S I F C K I H S G L D M V L T I T S I !  
F I A I D R Y Y A V C K P L L Y P T K I T L P V I G L F V T F S C M F S I V Y G F A L I F S D A N V Y G I E D Y I S A I S C H G S  
C A L I F N K L W G H L D P L I A V F V P V S V I V Y I Y L K I Y F V A R K H F R A I G N I T H R L N S K Q Q N N T G G F Q K K E  
F K A A V K L G D V I G I F I I C W L P F F I I T I V D P Y I G F S T P P A L F E V F V W L G Y F N S T C N P I L Y G F F Y L W F  
H K A L K M I I S C K I F D E H S P M M N V Y L E \*

### **>Rt-taarIIb**

M Q N P I C A A L V G N L Q \* C F K F V N D S C S R A V M F T V T Q V T M Y I V L I T S I L I T V F G N L M V I I S I S H F R Q F  
Q T P T M !  
F S S A A T D F L V G F S V I P Y S M V R S I E T Y W Y F G S T F C K I H S S L D M M S T A S I F H L C F I T I D L Y C A V C D P  
L H Y L T P L V N A I F T T V S W !  
I P A L F A F G V V F S E M N L W G I Q D V I I S N S R V G S C V H V F N H Q W G I L A P T I A F C I P G V I M L G I Y I N I Y F  
V A R K H A K A N E N T N K R T N C A E E N K R Q R S R S K E V K T A K S L G I V I G I C W T C W I P F F I T P V I D P M I N F S  
T L P I I F D A F V W F G H F N S A F N P I L C A L L H P W F \* R S L K L M L T W K I L D F N S S T I N L F L D W L P S E P C K K  
N E

### **>Rt-taarIIc**

S L S L I L V T V L G N L L V I I S I S H F K Q L H T P T Y Y L V L S L A V A D L L L G L V V L P N C M G Y S V E T C W Y V G N I  
L C D V H I R L S V T L A L V S I N L L G F I A V S H Y Y A V C D P L L Y T T K I T L P A I I T I I I F I W V F S I I Y G F G L V  
C S K I I R K G I E D Y I R T V S C H G S C I L A F N K L W G H L N P L I G F L G P S L T I F D I Y I R I F I I A R R H A R V I R  
N M T R K A Q S E E E Y S N L D F A G K E H N A A M K L S I V I V V Y I I C W L P Y C M I I V V D P Y I N Y S T S R V L F S A T L  
W F G F I N S A F N P I L Y A F F Y P W F C K A V K R I L S C K I L N L D S S T I N L F P D N \*

### **>Rt-taarII d**

M N L S D H E N S D N V Q Y C F E F V N T S C A R V T R S I A I N V A L Y I F I I T S I L I T I F G N L V V I I S V L H F K Q L Q  
T P T N F L L S S L A V V D F L V G F I V L P Y S M V R S V E K C W Y F G E V F C K I H S I T E I V L T V V S I Y T L C F I A I D  
R Y Y A M C D P L F Y S V K I T L P V T V M T I I L I W L F A V F Y G L S V F L L D F S K K S V D D Y V A V R S C E G S C I A Y H  
K F E G H I D A L I V F F I P I F I I L G I Y V K I F F V T R C K R C R K I E N M P N D S H C T E E N N V T I M H K K D Q I V V R  
K Q D I L I G I F T F S W L P F Y V N S I L N P Y F D F L I P P V L D S V F A W F G F F N S T L N P L L Y A F L Y P W F R K S L K  
L I L S C Q I F N T D P S T V N F L S E \*

## **Bony fish class II TAAR**

### **TAAR 12**

## **Anguilla anguilla**

### >Aa-taar12a

MKSLGINLTGDSAETQYCFPYLKGSCPRSQTLLIIKAAMYMFMAFTILLTVCGNLLVVIISISHFR  
QLHSPTNLLILSLACIDCCLGSFIMPYSMIRSVENCWYFGEIICKMHACFDMMSIASILHLCLI  
SVDRYWAICKPLQYKSLVSMQKVACLI AIIWIFSFSGFGFVLLSKVHLAGMEEFIMMNSCAGTCF  
VILNKEWGVVAALVAFFIIPGTVMTSLYLKIIFYVARSHARKINDSLAVTAEINNHNKRMSEQREKK  
AAKTLGIVMGVFLLCWLPFFTTIVVDPFINFSTPNSVFDALVWLGYFNSTCNPLIYGLFYPWFQK  
VFKIILSGQVFHRGSSSLNICSEM

### >Aa-taar12b

MDSLGINMTGDSAETLYCFPHLERSCPRSQTFIIIIKAAMYMFMAFSILMTVCGNLLVVIISISHFR  
QLHSPTNLIILSLA×SKRPSCIDWFLGAVIMPGSMIRTVENCWYYGEAACIILSSFDMMMSIASI  
LHLCLISVDRYCAICKPFWYRSSVTMOKVACVIVI IWTFSFGFGFVFLSNFPLADLEEFVMASP  
CVGNCLVLIKGEWGVGSAVLSFFVPGIVMTSLYLKIIFYVARSHARKINDSLALTGAVYNHKDHMS  
EQREKKAAKTLGIVMGVFLLCWLPFFLTVI IETLHHFPNIFVLDLLLWLGYLNSTCNPLIYGF  
YSWFQTVFKMIISGKVFHSGSSSFNIGTDHFK

### >Aa-taar12c

MEILALNWTGDSAGTQYCFPHLKGSCCLRSQTPIIIKVVMYMLMAVTILLTVCGNLLVVIIVISHFR  
QLHSPTNLLILSLACIDWFLGAFIMPYSMIRSVENCWYFGETFCKIHSSLDIMMTVASLLHLGLI  
SVDRYLSICKPLQYSTSVTTRNVAALVVITWMFSFAFGFVVIHNSINRVGMEKLLMNNSCTGNCT  
FFFNKEGGMAIILGFFIPGSVMIALYMKIFCVAKEQARKIDCSLAMTRARCDKCKPSEHRERKA  
AKTLAIALGVFLLCWLPVLMALI IDPFFDFSAPVVLFDALVWLGYFNSTCNPVIYGFFFSCFQKV  
FKIILSGKIFQNGSALLNIYEENY

### >Aa-taar12d

VAALIGITWMFSFAFGFVILSKVNLVGVVEELFINSCTGTICILFFNKEGGMAAFVGGFFIPGSVM  
IALYMKIFYVAKVQARKIKCSLAITRAQCDDKCTSEHRERKAAKTLAIVLGAFLLCWFPFVMVLI  
IDPFFDFSTPAVVYDALVWLGYFNSTCNPLIYGFFYPWFQRVFKIISGKVFQNGSLLNIYSEN  
Y\*

### >Aa-taar12e

LAFGFGVILSKVNLVGVVEELFIDPCTGSCILFFSKERGMMAAFVAFFIIPGTVMIALYMKIFYVAK  
VQARKIKCSLAMTRAQCCKNGTSEQTERKAAKTLAIVLGVFLLCCLPFTMLLVNSFLDYSAPT  
VFDALGWLTYNSTCNPLIYGFFYPWFQKRVFKIILSGKVFQNGSLLNIYEERN\*

### >Aa-taar12f

MEVLGRNLTGDSAETPYCFPKVKGSCCLRSQTLILIKVAVYIFVAFIILMTVCGNLLVVIISISHFR  
QLHSPTNLLILSLAFTDWFLGGFVMPCSLIRSVENCWYFGETFCKIHSSLDITLGIASLLHLGLI  
SVDRYLAICKPLQYRTSVTMHKVAALVGITWMFSFAXXFGVILSEINLVGIEELFINSCTGTCTFY  
VFNKQGGVIASVFTFFIIPGTVMTGLYMKIFHVAKLQARKINCSMAMTRALHEKKDCTSEQKERKA  
AKTSLIVLGVFLLCWLPFFLVLIIVDPFLDFSTPAVVFDALSWLAYFNSTCNPLIYGFFYPWFRKV  
FKMFLSGQIFQNGSLLNIYAENKL

>Aa-taar12g

LLILSLACIDCCLGSFVMPYSMIRSVESCWYFGEIACKMHSAFDMTMSTASILHLCLISIDRYFA  
ICKPLWYRSSVTMNKVTCLIVITWLFSSFGFSFGVVFMSVNLVGMEEELITMNSCTGNCLLI FNKQW  
GVVAALVAFFIPGTVMTSLYLKI FYVARSHAKKINDSLSAPRAVTDKKNHSFEQREKKA AKTLAF  
VMGVFVLCWLPFFVTLIVDPFINFSTPLSVADALIWLGYFNSTCNPLIYGFFYPWFQKVKIIIS  
GKVFQNGSSLLSIYIENV

**Anguilla japonica**

>Aj-taar12a

MKSLGINLTGDSAETQYCFPYLKGSCPRSQTLLIIKAAMYMFMAFTILLTVCGNLLV IISISHFR  
QLHSPTNLLILSLACIDCCLGSFIMPYSMIRSVENCWYFGEIICKMHSSFDMMSIASILHLCLI  
SVDRYWAICKPLQYKSLVSMQKVAWLIAI IWIFSSFGFGFVLLSKVHLAGMEEFIMMNSCAGTCF  
VILNKEWGVVAALVAFFIPGTVMTSLYLKI FYVARSHARKINDSLAVTAEINNHKNRMSEQREKK  
AAKTLGIVMGVFLLCWLPFFTTIVVDPFINFSTPNSVFDALMWLGYFNSTCNPLIYGFFYPWFQK  
VFKIILSGQVFHRGSSSLNICSEM\*

>Aj-taar12b

MDSLSINMTGDSAETQYCFPHLERSCPRSQTFIITKVAMYMFMAFSILMTVCGNLLV IISISHFK  
QLHSPTNLLVLVSLACIDWFLGAVIMPGSMIRTVENCWYFGEAACIILSSFDMMSIASILHLCLI  
SVDRYCAICKPFWYRSSVTMOKVACVIVI IWTFSFGFGFVFLSNFPLADLEKSVMASPCVGNV  
LVIKGEWGVGSAVLSFFVPGIVMTLLYLKI FYVARSHARKINDSLALTGAVYNHDKDMSEQREKK  
AAKTLGIVMGVFLLCWLPFFITVIEIETLHFFPNIFFVLDLLLWLGYLNSTCNPLIYGFFYSWFQT  
VFKMIISGKVFHIGSSSFNIGTDHFK\*

>Aj-taar12c

MEILSLNWTGDSAETQYCFPHLKGSCCLRSQTPIIKAVMYMLMAVTIILMTVCGNLLV IIAISHFR  
QLHSPTNLLILSLAFIDWFLGAFIMPYSMIRSVENCWYFGETFCKIHSSLDIMMTVASLLHLGLI  
SVDRYLSICKPLQYSTSVTTRNVAALVVITWMFSFAFGFVILSNINRVGMEKLLMKNSCTGNCT  
FFFNKEGGMAIILGFFIPGTVMTALYMKIFCVAKEQARKIDCSLAMTRARCDKKCPSEHRERKA  
AKTLAIALGVFLLCWLPVMAI IIDPFLDFSAPVVLFD AFLWLGYFNSTCNPVIYGFFFSCFQKV  
YKIILSGKIFQNGSSLLHIYEENY\*

>Aj-taar12d

MGSLGRNLTGDSAGTQYCFPHLKGSCPRSQTLILIIKAAMYMFMAFTIILMTVCGNLLV IISISHFR  
QLHSPTNLIILSLAFIDWFLGTFIMPYSMIRSVENCWYFGETFCKIHSSIDIMMSIASLLHLGLI  
SVDRYLAICKPLQYRASVTMHKVAALIGITWMFSFAFGFVILSKVNLVGVVEELFINSCAGTCIL  
FFNKEGGMAAFVGFPIPGSVMIALYMKIFVYAKVQARKIKCSLAITRAQCDDKCTSEHRERKAA  
KTLAIVLGAFLLCWLPFVMVLI IIDPFFDFSTPAVVYDALVWLGYFNSTCNPLIYGFFYPWFQRVF  
KIIISGKVFQNGSSLLNIYSENY\*

>Aj-taar12e

MEILARNSTGDSEETQYCFPNLQGSCLRSQKLIFIKAAMYICMGFIILMTVCGNLLV IISISHFR  
QLHSPTNLIILSLAFIDWFLVGFVMPYSMIESVENCWYFGETFCKIHSSIDIMMSIASLLHLGLI

SVDRYLAICKPLQYRTSVTMHKVATLIGITWMF'SFAFGFGVILSKVNLVGVEELFINSTGTCIV  
FFNKEGGMMAAFVGFPIPGSVMIALYMNIFYVAKVQAWKINCSLAMTRARCDKKCTSEHTDRKAA  
KTLAIVLGVFLLCWLPFSMVLVLDPPFDYSTPAVVFDALGWLGYFNSTCNPLIYGLFYPWFRRVF  
KIILSGNVFQNGSSLLNIYVERN\*

#### >Aj-taar12f

MKFLSINLTGDSEETKYCFPNLKGSCCLRSQKLILIKVAMYFCMAFIILMTICGNLLVIISISHFR  
QLHSPTNLIILSLAFIDWFLGAVLMPSCMIRSVEDCWYFGETFCKIHSSVDIMVSIASLLHLGLI  
SVDRYLAICQPLQYRTSVTMHKVAALIGIWMF'SFAFGFGVILSKVNLVGVEELFINSTGTCIV  
FFNKEGGMMAAFVAFFIPGIVMIALYMNIFYVAKVQARKIKCSLAMTRARCDKNGTSEQTERKAA  
KTLAIVLGVFLLCCLPFSMVLVLPVFDYSTPAVVFDVAVGWLGYFNSTCNPLIYGLFYPWFRRVF  
KMILSGKVFQNGSSLLNIYVERN\*

#### >Aj-taar12g

MENMGLNLTGVSAETQYCFPHLNGSCQRSQTLTIKAAMYMFMACTIILMTVFGNLLVIIGISHFR  
QLHSPTNLLIILSLACIDCCLGSFVMPYSMIRSVESCWYFGEIACKMHSAFDMTMSTASILHLCLI  
SIDRYFAICKPLWYRSSVTINKVTCLIVITWLF'SFGFSFGVVFSMVNLVGMEELITMNSCTGNCL  
LIFNKQWGVVAALVAFFIPGTVMTSLYLKIIFYVARSHAKKINDLSAPRAVTDKKNHSFEQREKK  
AAKTLAFVMGVFVLCWLPFFVTLIVDPFINFSTPLSVADALIWLGYFNSTCNPLIYGFYYPWFQK  
VFKIISGKVFQNGSSLLSIYIENV\*

#### >Aj-taar12h

MKIIMQIFVCCRYYLEVSAMKMEILALNLTGDSVETQYCFPHLKGSCCLRSQTLILIKVAMYFMMAF  
IILMTVCGNLLVIISISHFRQLHSPTNLIILSLACIDWFLGAVVMPGSMIKSVENCWYFGETFCK  
IHYSTDVMMSTASLLHLGLISVDRYLAICKPLQYRTSVTMHKVAALVGITWMF'SFAFGFGVILSK  
INLVGVDELINPCAGTCIMFVNREWGMTAAFVGFPIPGTIMVALYMKIFYVAKIQARKINCSLG  
VTRAEQDKKDYSSSEQREKKAATLGFVLGVYGLCWLPFVMTLVINPSFDLSTSAVVFDALGWLGY  
FNSTCNPLIYGFYYPWFQRFRIILSGKVFQNGSSLLNIYAENNL\*

#### >Aj-taar12i

MEILVHNMTGDSAEMQYCVPHQKGSCLRSQTLIIKIVAMYICMGFIILMTVCGNLLVIISISHFR  
QLHSPTNLIIMLSLAFIDWFLGAFIMPSCMIRSVENCWYFGETFCKIHSSVDIMMSIASLLHLGLI  
SVDRYLAICKPLQYRTSVTMHKVAALIGITWMF'SFAFGFGVILSKMNLVGVEELFINACTGTCYL  
FFNKQGGVVAFLGFIMPCTVMVLYMKIYVAKVQARKINCSLTMTGAKQDKKNCAPEQREKKA  
AKTLAIVLGVFLLCWLPIMMVLIVDPFFNFSTPVVFDGLMWLAYFNSSCNPLIYGFYYPWFRRV  
FKIISGKVFQNGSSLLNIYAENKR\*

### ***Astyanax mexicanus***

#### >Am-taar12a

MNLTDAADNVLLCFPHLPDSCPREHRFLVLKVVYFLTLGTILMTVLGNLLVIITISYFKQLQS  
PTNLIILSMALVDCMLGCLIMPFSLVRWLERCWFLGEIFCQIHSGLDMTLSIASILHLCLVSVDR  
YMAICDPLSYKMNVTNFSAAVCIWVLFVSVTF'SFGVVLKINIVGLELLMQAACVGSICALIFN  
RQWGVIVSLVAFFGPGAVMSALYLKIFHVARQAKIMSERSTVRQTNSETKAHSSEHRERKAAKT



LGIVMGIFLLCWLPPFFIVTITDPFLNFSTPIDVFDALVWFGYLNSTFNPLIYGFFYPRFQRAFKI  
IISKVLHLNANNLLL\*

### >Am-taar12b

MDSLIMNMTAAENVLLCFPHLPDSCPRAHRFLAFKVIIMYFLMMASILMTVFGNLLVIITISYFKQ  
LQSPTNLIILSLALVDCLLGCMVMPFSLVRWLERCWFLGEIFCQIHSGLDMTLSIVSILHLCLVS  
VDRYMAICKPLSYRMKVTVNGSVSVCIAVIWLFSLTYSFGVVLKVNVIENLLVQAPCVGNCAL  
IFNLQSGISLALVGGFVPGAVMTTLYLKI FQVARKQAKIMSERATVRQTNSETAVHSSEHRERKA  
AKTLGIIMGIFLLCWLPPFFLVTLTDPLLGFPTPLDVFDALVWFGYLNSTFNPLIYGFFHPRFQRA  
FKI IISKVLHLNANNLLL\*

### >Am-taar12c

MDTLFMNKTVDVNVLLCFPNQLDSCPRQLQRFVSLK GAMYGFMLVAILMTVFGNLLVIFSI SHFKQ  
LQSPTNFIILSMALVDCLLGCLVMPFMSVRWVEGCWFLGDFFCQIHSSLDMTLSIASILHLCLVS  
VDRYMAICDPLSYRMKVTVNGSVAVWIVVTWLFSCLF SFGIVFSKVNLI GLDEQMLNSCVGNCVLI  
FNKEWGVIAPLLNFYIPGTIMSCLYLKI FHVARKQAKMISDR TAVGLAGEKNQVSEQRERKAAKT  
LGIVMGVFLLCWLPPFFLTVIDPFLGFSTPVDVFDALIWFGYFNSMFNPLIYGFFYPRFQKAFRI  
IILRYVCREFTNSSNLVLQ\*

## **Anguilla rostrata**

### >Ar-taar12a

MKSLGINLTGDSAETQYCFPYLKGSCPRSQTII IKAAMYMFMAFTILLTVCGNLLV IISISHFR  
QLHSPTNLLI LSLACIDCCLG SFIMPYSMIRSVENCWYFGEI ICKMHSSFDMMMSIASILHLCLI  
SVDRYWAICKPLQYKSLVSMQKVACLIAI IWIFSF GFGFGVLLSKVHLAGMEEFIMMNSCAGTCF  
VILNKEWGVVAALVAFFIPGTVM TSLYLKIFYVARSHARKINDSLAVTAEINNHNRMSEQRK  
AAKTLGIVMGVFLLCWLPPFFTTIVD PFINFSTPNSVFDALM WLGYNSTCNPLIYGLFYPWFQK  
VFKIILSGQVFHRGSSSLNICSEM\*

### >Ar-taar12b

MDSLGINMTGDSAGTQYCFPHLERSCPRSQTFI I IKAAMYMFMAFSILMTVCGNLLV IISISHFR  
QLHSPTNLLVLSLACIDWFLGAVIMPGSMIRTVENCWYYGEAACI IFSSFDMMMSIASILHLCLI  
SVDRYCAICKPFWYRSSVTM QKVACVIVI IWTFSFGFGFGVFLSNFPLADLEEFVMA SPCVGNV  
LVIKGEWGVGSAVLSFFVPGIVMTS LYLKIFYVARSHARKINDSLALTGAVYNHKDRMSEQRK  
AAKTLGIVMGVFLLCWLPPFLTVI IETLHFFPNI FFVLDLLLWLGYLNSTCNPLIYGFFYSWFQT  
VFKMIISGKVFHSGSSSFNIGTDHFK\*

### >Ar-taar12c

MEILAFNWTGDSAETQYCFPHLKGSC LRSQTPII I KVVMYMLMAVTILLTVCGNLLV IIAISHFR  
QLHSPTNLLI LSLACIDWFLGAFIMPYSMIRSVENCWYFGETFC KIHS SLDIMMTVASLLHLGLI  
SVDRYLSICKPLQYSTSVTTRNVAALVVITW MF SFAFGFGVIH SNINRVGMEKLLMKNYCTGNCT  
FFFNKEGGMAI I LGFFIPGTVM TALYMKIFCVAKEQARKIDCSLAMTRARCDK KCPSEHRERKA  
AKTLAIALGVFLLCWLPLVMALI IDPFLDFSAPVVLFD AFWLWLGYNSTCNPV IYGFFFSCFQKV  
FKIILSGKIFQNGSLLNIYEENY\*

>Ar-taar12d

SMIRSVENCWYFGETFCKIHSSIDIMMSIASLLHLGLISVDRYLAICKPLQYRTSVTMHKVAALIGITWMFSFAFGFGVILSKVNLVGVEELFINSCTGTCILFFNKEGGMMAAFVGGFFIPGSVMIALYMKIFYVAKVQARKIKCSLAITTAQCDDKCTSEHRERKAAKTLAIVLGAFLLCWFPFVMVLIIDPFDFSTPAVVYDALVWLGYFNSTCNPLIYGFFYPWFQRVFKIIISGKVFQNGSSLLNIYSENY\*

>Ar-taar12e

MEILALNLTGDSAETQYCFPHQKGSCLRNQTLILLKVVMYICMAFIILMTVFGNLLVIISISHFRQLHSPTNLIILSLAFIDWFLGAFVMPSCMIRSVEDCWYFGETFCKIHSSIDIMMSAASLLHLGLISVDRYLAICKPLQYRTSVTMHKVAALIGITWMFSFAFGFGVILSKVNLVGVEELFINSCTGTCIVFFNKEAGMMAAFVAFVFFIPGTVMIALYMKIFYVAKVQARKINCSLAMTRAQCNDKCTSEQTERKVAKTLAIVLGVFLLCWLPFMSMLIVDPFFDYSTPAVVFEAFGWLGYFNSTCNPLIYGFFYPWFKRKFKIILSGKVFQNGSSLLNIY\*

>Ar-taar12f

MEILALNFTEDSEETQYCFPNLKGSCCLRSQTLILIKVAMYICMGFIILMTVCGNLLVIISISHFRQLHSPTNLIILSLAFADWFLGAFVMPYTMITYVENCWYFGETFCKIHTSTDITLCVASLLHLGFIISVDRYLAICKPLQYRTSVTMHKVAALIGIIMWFSFAFGFGVILSQVNLVSGEELFINYCTGSCILFFSKEKAMVAVFVAFVFFIPGSVMLALYMKIFYVAKVQARKINCSLAMTRAQCDDKCTSEHRERKAAKTLAIVLGAFLLCWFPFVMVLLVDPFFDYSTPTVVFEAFGWLGGFNSTCNPLIYGFFYPWFRRVFKIIISGKVFQNGSSLLNIYAERN\*

>Ar-taar12g1

MEILARNLTGDSEETQYCFPNLQGSCLRSQKLIFIKVAMYICMASISLMTVCGNLLVIISISHFRQLHSPTNLIILSLAFIDWFLGTFLMPCSMIRSVEDCWYFGETFCKIHTSTDIMLCVASLLHLGLISVDRYLAICKPLQYRTSVTMHKVATLIGITWMFSFAFGFGVILSKVNLVGVEELFINSCTGTCILFFNKEGGMMAAFVGGFFIPGTVMIALYMKIFYVAKVQARKINCSLAMTRARCDKCTSEHTDRKAAKTLAIVLGVFLLCWLPFMSMLVLDPFFDYSTPAVVFDALGWLGYFNSTCNPLIYGLFYFPWFRRVFKIIILSGKVFQNGSSLLNIYVERN\*

>Ar-taar12g2

CWYFGETFCKIHTSTDIMLCVASLLHLGLISVDRYLAICKPLQYRTSVTMHKVAALIGITWMFSFAFGFGVILSKVNLVGVEELFINSCTGTCIVFFNKEGGMMAAFVAFVFFIPGSVMIALYMKIFYVAKVQARKINCSLAMTRARCDKCTSEQTERKAAKTLAIVLGAFLLCWLPFMSMLVLDPFFDYSTPAVFDALGWLGCNFCNPLIYGLFYFPWFRRAFKIIILSGKVFQNGSSLLNIYEERN\*

>Ar-taar12h

MKIIMQIFLCCRYYLEVSAMKILALNLTGDSVETQYCFPHQKGSCLRSQTLILIKAAMYMFMAFIILMTVCGNLLVIISISHFRQLHSPTNLIILSLACIDWFLGAVMPGSMIKSVENCWYFGETFCKIHYSTDVMMSTASLLHLGLISVDRYLAICKPLQYRTSVTMHKVAALIGITWMFSFAFGFGVILSKINLVGVDELLINPCAGTCIMFVNKEWGMTAAFVGGFFIPGTIMVALYIKIFYVAKIQARKINCSLGVTRAEQDKKDYSSGQREKKAATLGIVLGVYGLCWLFPVMTLVINPSFDLSTSAVVFDALGWLGYFNSTCNPLIYGFFYPWFQRVFRIILSGKVFQNGSSLLNIYAENNL\*

>Ar-taar12i

MEILAHNMTGDSAEMQYCVPHQKGSCLRSQTLIIIKVAMYICMGFIILMTVC**GN**LLVIIISISHFR  
QLHSPTNLIIMLSLAFIDWFLGAFIMPCCSMIRSVENCWYFGETFCKIHSSVDIMMSIASLLHLGLI  
SV**DRYLAICKPL**QYRTSVTMHKVAALIGITWMFSFAFGFGVILSKMNLVGVEELFINACTGTCYL  
FFNKQGGGLVVAFLGFIMPCTVMVLYMKILYVANVQARKINCSLTMTGAKQDKKNCAPEQREKKA  
AKTLAIVLGVFLLCWLPIIMVLIIVDPFFNFSTPVVVFDDGLMWLAYFNSSCNPLIYGFFYPWFRRV  
FKIIISGKVFQNGSSLLNIYAENKR\*

>Ar-taar12j

MEVLGRNFTGDSAETLYCFPQVKGSCLRSQTLILIKVVVYIFVTFIILMTICGNLLVIAISHFR  
QLHSPTNLLIILSLAFTEWFLGGFVMPYSMIRSVENCWYFGETFCKIHSSLDITLGIASLLHLGLI  
SVDRYLAICKPLQYRTSVTMHKVAALVGITWMFSFASGFGVILSEINLVGIEELFINSCTGTCFY  
VFNKQGGVIASVFTFFIIPGTVMTGLYMKIFHVAKLQARKINCSMAMTRALHEKKDCTSEQKERKA  
AKTLSIVLGVFLLCWLPPFLVLIIVDPFLDFSTPAVVFDALSWLAYFNSTCNPLIYGFFYPWFRKV  
FKMFLSGQIFQNGSSLLNIYAENK\*

>Ar-taar12k

MEIPAPNLTRDSAEIQYCFPNQKGSCLRSQTLILIKVTMYICMAFIILITVCGNLLVIIISISHFR  
QLHSPTNLIILSLAFTDWFLGAFIMPCCSMIRSVENCWYFGETFCKIHSSVDIMMSIASLLHLGLI  
SVDRYLAICKPLQYRTSVTMHKVAALIGITWMFSFAFGFGVILSKVNLIIGVEELFINSCTGTCIL  
FFNKQGGMLAAFLGFIMPCTVMVLYMHIYVAKVQARKINCSLTMTGAKQDKKNCASEQREKKA  
AKTLAIVLGVFLLCWLPPFVMVLIIVDPFFKFSTPAVVFDGLMWLAYLNSSCNPLIYGFFYPWFQRV  
FKIIISGKVFQNGSSLLNIYAESK\*

>Ar-taar12l

MGSLGLNLTGDSVETQYCFPHQKGSCLRSQTLILIKAAMYMMAFTIILMTVFGNLLVIIISISHFR  
QLHSPTNLIILSLAFIDWFLGTFIMPYSMIRSVENCWYFGETFCKIHSSIDIMMSIASLLHLGLI  
SVDRYLAICKPLQYRTSVTMHKVAALIGITWMFSFAFGFGVILSKMNLVGVEELFINACTGTCYL  
FFNKQGGGLVVAFLGFIMPCTVMVLYMKILYVANVQARKINCSLTMTGAKQDKKNCAPEQREKKA  
AKTLAIVLGVFLLCWLPIIMVLIIVDPFFNFSTPVVVFDDGLMWLAYFNSSCNPLIYGFFYPWFRRV  
FKIIISGKVFQNGSSLLNIYAE

**Cyprinus carpio**

>Cc-taar12a

MIANETDIENVFLCYPLRPDSCPSAHLRTVLKVVMYVFMLLMILTTFVGNLLIIISISHFKQLQS  
PHTLIVQSLAACDCLLGSVMPYSMVRSEGCWYLGDDVCKVHSSLDMTFSISSILHLSLIAIDR  
YWAICDPLRYRMRVTNNTVTVFITFTWLFVSVVFTGVNNGLEELILQISCFGGCVLFFN  
KEWGLICALFVFLIIPGTIMSSLYMSIFNVVKKHVKVLSEKVSVAPTVGSNCQTSSQRESKAAKTL  
AIVMGVFYLCWLPPFTATAIDPFLNFVTPVDVFDALVWFGYFNSTCNPLIYGFFYPWFQKAFKIL  
ISTYICGISKSHTLTFQ\*

>Cc-taar12b

MTLNETGIYPENVFLCYPLLPDSCPRAHRLPALKVAMYVFMVLMILTTFVGNLLIIISISQFKQL  
QSPHTLIVRSLAASDCLLGSVMPYSMVRSEGCWYLGDDVCKVHSSLDMTFSISSLIHLSLISV

DRYMAICDPLRYKMRVTNNIVSVFTTFTWLF SFLYSFSIVFSGV NKIGLESFIMQVYCVGSCVLF  
FNKQWGLICSLTFFLP GTIMSSLYMEIFHVARKHAKVMSE RVTVMATGGLKIQSSTEREGKAAK  
TLAIVMGV FYFCWLPFFTATAVD PFLNFVTPGDVFDALVWFGYFNSTCNPLIYGFFYPRFQKAFK  
ILISTYICGCNDSSTLILE\*

>Cc-taar12c

MCISFFGYWSLTNCTIFIILSLFMITKKIFLASRSNVM TNLNKTDIYFENMFLCYPLLNSCPKLH  
RLTVVKVAIYIFMVL MILTTVFGNLLIIISISHFKQLQSP THLIVRSLAASDCLLGS LVM PYSMV  
RSVEGCWYLG DVVCTVHSSLDMSFCISSLLHLSLVSVD RYMAICDPLRYRMRVTNNTVTAFITFI  
WLF SIFYSFFIVFSGV NKIGLESFIMQVYCVGSCV LFFNKQWGIICPILTFFLP GTIMSSLYMKI  
FYVAQKHAKVMSE RVTVMAAVELKSQSSVHRERKAAK TLAIVMGVFLFCWLPIFIATIIDSFLNF  
VTPASVFDALVWFGYFNSTCNPLIYGFFYSRFQKAFKILISSCIYGFSDSITLTFE\*

>Cc-taar12d

MTSNETDIVNMLLFYPLWSDSCLKLHHLAVVKVAMYVLIVLMILTTVFGTC\*SLISISHFK!  
TSFKCHPTHHRMYRLSELPATVSSVEGCWNLGDV VCKVHSSLDMSFCISSLLHLSLISVD RYTAI  
CDPLRYKMR IKNNKVTALISFIWVFSLVYSFYVVFSGINRIGLESFFIQVYCMGSCV LFLNKEWG  
IMRPILVFI LPKTIMNSLYIKIFHVARKHTKVMSE RVTGRLKSQSSAHRERNAAKALAIVIGVFC  
SAGLFFFYCYCTYFFT PAVVKVILWVRLPFH\*

>Cc-taar12e

MTSNETQ TENILLCYPLRPDSCPKLHCLTVVKVAMYVLM LLMILTTVFGNLLIIISISHFKQLQS  
PTHLIVRSLAASDCLLGS LVM PYSMVRSVEGCWYLGDFVCKVHSSLDMSFCISSLLHLSLISVDR  
YWAICDPLRYKMRVTNNTVTVFTTFIWLF SFLYSFYVVFSGVNTIGLELFIMQVYCVGSCV LFFN  
KQWGLICPILTFFLP GTIMSSLYLKI FHVARKHAKVMSE SVTGGLKSQSSAHRERKAAK TLAIVM  
CVFLFCWLPYFTVTALDPFFNFFT PAVVFDALIW FAYLNSTCNPLIYGFFYPCFQSAFKILISTY  
ICGNKDPNTTTFK\*

>Cc-taar12f

MTSNETDTQIVFLCYPLRPDSCCLKVPRYVMVKVAMYAF LVLMLITTVFGNLLIIISISHFKQLQS  
PTHLIVRSLAASDCLLGS LVM PYSMVRSVEGCWYLGDFVCEVHSSLDMTFCISSILHLSLISVDR  
YWAIFDPLRYKIRVTNNTVTVFTTFCIFLFSFLYSFSIVFSGV NKIGLESFIMQFYCVGSCV L VFN  
KQWGIICPILTFFLP GMIMSSLYIKIFYVARKHAKVMSE RVTGGLKSQSSAHRERKAAK TLAIVM  
CVFLFCWLPNFTAALDPFFNLWTPAAVFDALFW FAYFNSTCNPLIYGFFYPCFQKAFKILISTY  
ICGIKHSNTLIF

>Cc-taar12g

MTSNDNQ TENMFLCFPLRPDSCCLKHRLTVVKGAMYVLM VLMILTTVFGNLLIIISISYFKQLQS  
PTHLIVRSLAASDCLLGS LVM PYSMVRSVEGCWYLGDFVCEVHSSLDMSFCISSILHLSLISVDR  
YMAICDPLRYRMRVTNNTVTAFIIFIWLF S FVYSFSVVFSGITADGLEMLILQTYCVGSCV VFFN  
KQWGIVCPILTFFLP GMIMSSLYLKI FYVAQKHAKVMSE RVTGGMKSQSSAHRERKAAK TLAIVM  
GVFLLCWLPYFTAALDPFLNFWTPAVVFDALFW FAYFNSTCNPLIYGFFYPCFQKAFKILISTY  
ICGNKHSNTLIFE\*

>Cc-taar12h

MTSNKTQTENMFLCYPLRPNSCPKLRHRLTVVKVAMYSFLVLMILTTVFGNLLIIISISQFKQLQS  
PHTLIVRSLAASDCLLGSVMPYSMVRSVEGCWYLGEFLCKVHSSLDMTFCMSSLLHLSLISVDR  
YWAICDPLRYMRVTNNTVTVFITFIWLFSEFVYSFVSVVFSGISAVGIEMVILQSYCVGNCVFFN  
KEWSIICPVLVFFFLPGMIMSSLYVKIFYVARKHAKVMSEKVTGGLKSQSSAHRERKAAKTLAIVI  
GVYLFWCWLPYFTAALDPFFYFWTPAVVFDALFWFAYFNSTCNPLIYGFYPCFQKAFKILISTY  
ICGIKHSNTLTFE\*

>Cc-taar12i

MTSNLTQTENMFLCFPLRPNSCPKLRHRLTVVKVAMYAFFVLMILTTVFGNLLIIISISHFKQLQSPHTLIV  
RSLAASDCLLGSVMPYSMVRSVEGCWYLGEFLCKVHTNLDMTFSMSSLLHLSLISVDRYWAICDPLRYKM  
RVTNNTVTVFIAFIWLFSEFVYSFIVFSGISAVGIEMVILQSYCVGNCVMFFNKEWSIICPVLVFFFLPGTI  
MSSLYVKIFYVARKHAKVMSEKVTGGLKSQSSAHRERKAAKTLAIVMGVYLFCCLPYFTASVLDPPFFNYWT  
PAVVFDALFWFAYFNSTCDPLIYGFYPCFQKAFKILISTYFCGIKHLNLTIFVMNTALTLSGITINIYF  
HVILFFSYMLKPFCKRVLLEAVLIFLLI\*

>Cc-taar12j

MMTSNKTQTENMFLCYPLRPNSCPKLRHRLTVVKVAMYAFFVLMILTTVFGNLLIIISISHFKQLQ  
SPHTLIVRSLAASDCLLGSVMPYSMVRSVEGCWYLGEFLCKVHSSLDMTFSMSSLLHLSLISVD  
RYWAICDPLRYKMSVTNNTVTVFITFIWLFSEFVYSFVSVVFSGIGAVGLEMLILQSYCVGNCVVLFF  
NKEWSIICPVLVFFLLGMIMSSLYVKIFYVAQKHAKVMSEKVTGGLKSQKSSV\*

>Cc-taar12k

MTSNKTQTENMFLCYPLRPNSCPKTTRLTVVKVAMYAFFVLMILTTVFGNLLIIISISQFKQLQS  
PHTLIVRSLAASDCLLGSVMPYSMVRSVEGCWYLGEFLCKVHSSLDMTFCMSSLLHLSLISVDR  
YWAICDPLRYKMRVTNNTVTVFITFIWLFSEFVYSFVSVVFSGINTVGLEMVILQSYCVGNCVFFN  
KEWSIICPVLVFFFLPGTIMSSLYVKIFYVAQKHAKVMSEKVTGGLKSQSSAHRERKAAKTLAIVM  
GVVFLFCWLPFFFTASVLDFTLNFWTAVVFDALFWFAYFNSTCNPLIYGFYPCFQKAFKILISTY  
ICGIKQSNTLIFE\*

>Cc-taar12l

MMTSNKTQTENMFLCYPLRPNSCLKLHRLTVVKVAMYAFFVLMILTTVFGNLLIIISISQFKQLQ  
SPHTLIVRSLAASDCLLGSVMPYSMVRSVEGCWYLGDFLCKVNSSLDMTFCMSSLLHLSLISVD  
RYWAICDPLRYKMRITNNTVTVFTTFIWLFSFVYSFVSVVFSGISAVGLEMVILQRYCVGSCVVLFF  
NKEWSIICPVLIFFLPGTIMSSLYVKIFYVAQKHAKVMSEKVTGGLKSQSSAHRERKAAKTLAIV  
MGVFLFCWLPFFFTASVLDFTLNFWTAVVFDALFWFAYFNSTCNPLIYGFYPCFQKAFKILISTY  
YICGIKQSNTLIFE\*

>Cc-taar12m

MTSNKTQTENMFLCYPLRPNSCPKLRHRLTVVKVAMYAFFVLMILTTVFGNLLIIISISQFKQLQS  
PHTLIVRSLAASDCLLGSVMPYSMVRSVEGCWYLGDFLCKVNSSLDMTFCMSSLLHLSLISVDR  
YWAICDPLRYKMRITNNTVTVFTTFIWLFSFVYSFVSVVFSGISAVGLEMVILQRYCVGSCVVLFFN  
KEWSIICPVLIFFLPGTIMSSLYVKIFYVAQKHAKVMSEKVTGGLKSQSSAHRERKAAKTLAIVM  
GVYLFWCWLPYFTAALDPFFNYWTAVVFDALFWFAYFNSACNPLIYGLFYSCFQKAFKILISTY  
FCGIKHSNTFIFE\*

>Cc-taar12n

MTSNETNTQIVFLCYPLWPDSCCLKVQRNVVVKVAMYVFLLLMILTTFVGNLLIIISISHFKQLQS  
PTHLIVRSLAASDCLLGSLVMPYSMVRSVEGCWYLGEFLCKVHSSLDMTFCMSSLLHLSLISVDR  
YWAICDPLRYKMRVTNNTVTVFTTFFIWLISFLYSFTVVVFSGISAVGLEMLILQTYCVGNCVVFNS  
KQWGLICPIFTFFFLPGMIMSSLYMKIFHVARKHAKVMSEKRVGTGGLKSQSSAHRERKAAKTLAIVM  
GVYLF CWLPYFTA AVLDPFFNYWTPAVVFDALFWFAYFNSACNPLIYGLFYSCFQKAFKILISTY  
ICGIKHSNTLIFKRILLSHLFQASQ\*

>Cc-taar12o

MISKKMSVSGADVMTSNETQTENILLCYPFQSDSCPKLHRLTVVKVAMYVFMVLMILTTFVGNL  
LIIISISHFKQLQSPHTLIVRSLAASDCLLGSLVMPYSMVRSVEGCWYLGDFLCKVHSSLDMTFC  
ISSLLHLSLISVDRYWAICDPLRYKMRVTNNTVTVFTTFFIWLISFLYSFTVVVFSGISAVGLEMLI  
LQTYCVGNCVVFNSKQWGLICPIFTFFFLPGMIMSSLYMKIFHVARKHAKVMSEKRVGTGGLKSQSSA  
HRERKAAKTLAIVIGVYLLCL\*

***Ictalurus punctatus***

>Ip-taar12a

MEWIGSLITNATHANVDTALLCFPHEPDSCLRTARFVVIRFVMIYILMLPTILMTVFGNMLVITTI  
SYFKQLHSPTNFIILSLAVVDCLLGSIMPFMSMRVWVEGCWFLGEIFCKIHSSLDMTLSIVSILH  
LCLVSIIDRYMAITDPLSYKMKVTNDRVVVGIAVIWLFSSFSFSGVVLSNVNLDGLEDLLMLSSCV  
GNCALIFNRQWGVIAALVAFFVPGTIMSCLYLKIFHVARKQAKVMAERTTIGNCETKNRSSEQRE  
RKAAKTLGIVMGIFLLCWL PFFIMTIADPFLNFSTPVDVFDVLDVWVFGYLNSTCNPLVYGFYPRF  
QKAFKMIISKYVFHLNDSGNLTL\*

>Ip-taar12b

MGTLFMNNTDVEILLLCFPHQPDSCLKTTRFFVIRVIMYFLTLTAIVMTVFGNLLVITTI SYFKQ  
LHSPTNFIILSLAFVDFMLGCLVMPFMSMRVWVEGCWFLGDLFCQIHSSLDMTLSISSILHCLVSI  
IDRYMAITDPLGYKLVKVTNGNTAVCIAVWVIFSGMFSFGIVFSKINIAGLDEQMLNCTCVGNCVLI  
FNKEWGI IAPLLNFYIPGAIMTCLYLKIFHVARKHARLISDRTAGLTSGETKKQVSDQERKAAK  
TLGIVMGVFLLCWL PFFLITVIDPFLNFSTPLDVF DALI WFGYFN SMFNPLIYGFYPRFQKAFK  
IIIVRYLFHLKSSSNLVLQ\*

***Lepisosteus oculatus***

>Lo-taar12a

MNSTEVIEEMQYCFQHLKGSCPKVRR LAVIKVAMYVFMAGTIFVAVCGNCMVIIISISHFKQLHSP  
SNFLILSLGCVDCLLGSLIMPYSMIRSVESCWYFGEIFCAIHSSLDMMMSIASILHLGFIAADRY  
FAICDPLRYRNKMTMFNITLFIIVISWLFSAFAGFGVVLSKVNLAGIEEFVSSSSCVGACIVILNK  
EWGMLSASVAFIIPGTVMISLYIKIFFVARRHARVINAAAPVDDKSSIADKREKAAKTLGIVIG  
VFLLCWL PFFITIIIDPFIDFSTPVIVFD TLMWLGYFN SACNPMIYGFY PWFQKAFKIVVTGKV  
FCVGSSSINIFTDKY\*

>Lo-taar12b

MNSTTEFEEMQYCFQYLEGSCPKAHR TAVIKVAMYIFMVGTMLATVSGNLMV IISIAHFKQLHSP  
TNFLTSLG CADCLLGAFVMPYSMVRSVETCWYFGDLFCKIHSSLDMTISVASILHLTFIAVDRY  
VAICDPLRYRSKITTFVVAIFIGISWIYSLGLGFGVVFSKINLTGIEEFVILNSCVGTCFLIFNK  
HWGVLAALLAFLIPGTVMISLYVKIFMVASRHVRV LNDTSGKICARNDHKKR KIVENRERKAAKTL  
GIVMGVFLICWLPFFMATIIDPFIFGSTPVILFDALVWFGYFNSTCNPVIYGF FYPWFQAFKII  
ITGKVFCYNSSSTHLFTDKH\*

>Lo-taar12c

MEFLVDHGLKRFIMNSTNEEMEYCFQHVKGSCLKARRLAAIKGAIYTFVLGTILVTVCGNLMV I  
SIAHFKQLHSPTNFLILSLGCVDCLLGVLVMPYSMVRSVETCWYFGDLFCKIHSSLDMTISVASI  
LHLNCIAVDRYFAICNPLRYQNIITTLVVAIFIGIVWLYSLLFGFGLVFFKGR LASTDELIISNS  
CVGSCFIQFDKHWAVLGPLLVFFLPAVVMISLYVKILIVASRQAKVIKEISGTVVYQNGNK NKIK  
ANRERKAVKTL SIVMGIYLLCYVPFSVTTVTDLFLIFSPVVI FDTLIWLGYFNSTCNPIIYAF F  
YPWFQAFKIIITGNVHFHFGSSSINLFS DKY\*

***Leuciscus waleckii***

>Lw-taar12a

MGMYYIYVNLSLDIGLYQPIIYTIILLILCLITIKEMISASGVDVMM SNVTDSENVFLCYPLRLD  
SCPKVHRLTVVKVAMYVFMVLMILTTVFGNLLIIISISH!  
KHLQSPHTLIVRSLAASDCLLGSLVMPYSMVRSVEGCWYLGDFVCKVHSSLDLTF CISSI!  
HLSLISIDRYWAICDPLRYKMRVTNNTVTVFTTFTWLF S FVYSFSIVFTGINAVGLEMLILQVYC  
VGSCVLFFNKQWGLIAPILTFFLPGAIMSSLYMKIFHVARKHAKVMSE RVTVAAGGLKSQSSAQ  
RERKAAKTLAIVMGVFLFCWLPFFTVAALSSFFTTLLTPADFFDALVWFAYFNSTCNPLIYGF FYP  
CFQNAFKILISVASSIQTP\*

***Pimephales promelas***

>Pp-taar12a

VAMYVFMVLMILTTVFGNLLIIISISHFKHLQSPH MIVQSLAACDCLLGSLVMPYSMVRSVEGC  
WYLGDFVCKVHSSLDMTFSISSILHLSLVSIDRYWAICDPLRYKMRVTNNTVAVFITFTWLF S FV  
YSFSVVFTGVNNGLEELLQISCFGGCFLLFNREWG LICALFVFLIPGTIMSSLYLSIFNVVKK  
HAKVMSEKVSVAPTVGGNCQTSSQRERKAAKTLAIVMGV FYLCWLPFFTATAVDPFLNFVTPGDV  
FDALVWFGYFNSTCNPLIYGF FYPWFQAFKILISTYICGISESHILTFE\*

>Pp-taar12b

DCLLGSLVMPYSMVRSVEGCWYLGDFVCKVHSSLDMTFSISSKIHLCLISVDRYWAICDPLMYKM  
RVTNNIVTVFTTFTWLF S FLYSFSIVFSGVNTIGLESFIMQVYCVGSCVLFFNKQWGLICSL LTF  
FLPVATMSSLYMKIFHVARRHAKVMSE RVTVVTVGGLKSQSSAQREGKAAKTLAIVMGVFCICWL  
PFFTATAVDPFLNFVTPVDVFDALVWFGYFNSTCNPLIYGF FYPWFQAFKILISTYICGFKSSN  
ALILE\*

### >Pp-taar12c

MITKKIILGFGTVMTSNITDTKNMFLCYPLLLNSCAKSHRLTVVRVAMYVFMVLMILTTVFGNL  
LIIISISHFKHLQSPHTLIVRSLAASDCLLGSVMPYSMVRSVEGCWYLGDFVCKVHSSLDMTFC  
ISSILHLSLVSIDRYWAICDPLRYKMRVTNNSVAVFITFTWLFSEFLYSFIVFSGVKNIGLESEFI  
MQVYCVGSCVLFNFQWGLICPILTFFLPGMIMSSLYMKIFHVARKHAKVMSEKRVVTTAGGLKS  
QSSAQREGKAAKTLAIVMGVFYLCWLPFIATIIDSSLNFVTPASVFDALVWFGYFNSTCNPLIY  
GFFYSRFQAFMILISSRIYGFSDSRTLTFE\*

### >Pp-taar12d

MYYINVNLSLDIGFYQAIYKIILLILCLIKMKETISAYGADVMTSNETDSENMFCLCYPLLPDSC  
PKVHRLTVVRVAMYVFMVLMILTTVFGNLLIIISISHFKHLQSPHTLIVRSLAASDCLLGSVMP  
YSMRSVEGCWYLGDFVCKVHSSLDMTFCISSILHLSLVSIDRYWAICDPLRYKMRVTNNIVTVF  
TTFTWLFSEFVYSFYVVFSGINAVGLEMLILQIYCVGSCVLFNFQWLSLTCISILTFFLPGTIMSSL  
YMKIFHVARKHAKVMSEKRLKSQSSAQREGKAAKTLAIVIGVFYVCWLPYFTVTAVDPFYNYLTP  
ADVFDVVIWFAYFNSTCNPLIYGFYPCFQNAFKTLISTYVCGVNSNTLTLNE\*

### >Pp-taar12e

MYYINVNLSLDIGLYQAIYKIILLILCLIKIISAYGADLITSNETDSENMFCLCYPLLPDSCPKVHRLTVV  
KVAMYVFMVLMILTTVFGNLLIIISISHFKHLQSPHTLIVRSLAASDCLLGSVMPYSMVRSVEGCWYLG  
FVCKLHFLSMDMTFCISSILHLSLVSIDRYWAICDPLRYKLRVTNNIVTIFTTFTWLFSEFVYSFYVVFSGIN  
AVGKMLILQISCVGSCVLFNFQWGLICTVLLFFLPGMIMSSLYMKIFHVARRHAKVMSEKRVVTTAGGLK  
SQSSAHRERKAAKTLAIVMGVFYFCWLPYFTVTALDPFFNYLTPVDVFDALVWFAYFNSTCNPLIYGFY  
CFQNAFKILISTYVCGINDSNTLTLNK\*

## ***Pygocentrus nattereri***

### >Pyn-taar12a

MNVLNENMTEADVENVLLCFPHQPDSCPRAHRFLALKVPMYFLMLASILMTVFGNLLVIITISHF  
KQLHSPTNLIVLSLALVDCLLGLVMPFMSVRWLERCWFLGDVFCKIHSSLDMTLSIVSILHLSL  
VSIDRYLAICEPLSYRMRVTNGTVAVCIAFIWLFSLTFSFGVVLSEVNITGLENLLMLNSCGGNC  
ALIFNKQWGVIAALVAFFIIPGTIMSSLYLKIIFHVARKQAKVMSEKRVVTTAGGLK  
KAAKTLGIVMGIFFLCWLPFFIATIIDPFLDFSTPVDVFDALVWFGYLNSTFNPLVYGFYPRFQ  
SAFKIIISKYVLHLRNASQLVL\*

### >Pyn-taar12b

MNVLNENMTEADVENVLLCFPHQPDSCPRAHRFLALKVAVYVLLLATILMTVFGNLLVIITISHF  
KQLHSPTNLIVLSLALVDCLLGLVMPFMSVRWLERCWFLGDVFCKIHSSLDMTLSIVSILHLSL  
VSIDRYLAICEPLSYRMRVTNGTVAVCIAFIWLFSLTFSFGVILSEVNITGLENLLILSSCVGNC  
ALIYNKESGFILSFVAFFIPGAIMISLYLKIIFHVVRQQAKVMSEKRVVTTAGGLK  
KAAKTLGIIMGIFFLCWLPFFIVTTLTDPFQNFSTPLDVFDALVWFGYLNSTLNPLVYGFYPRFQ  
SAFKIIISKYVLRSLNANRLVL\*

### >Pyn-taar12c

MNVLNENMTEADVENVLLCFPHQPDSCPRAHRFLALKVAVYVLLLATILMTVFGNLLVIITISHF  
KQLHSPTNLIVLSLALVDCLLGLVMPFMSVRWLERCWFLGDVFCKIHSSLDMTLSIVSILHLSL  
VSIDRYLAICEPLSYRMRVTNGTVAVCIAFIWLFSLAYSFGVILSEVNITGLENLLILSSCVGNC



VLI FNKENA FILS FV LFF I PGT IMSS LYLK I FHVVRQQAKVM SERATVRR TSCEMNVQSSDHRER  
KAAKTLGIIMGIFLLCWL PFFIVT LSDPFRNFSTPLD VFDALVWFGYLNSTLNPLVYGGFFYPRFQ  
RAFKIIISKYVLHLGNASQLVL\*

### >Pyn-taar12d

MDSFIANMTEADV KDVLLCFPHQPDSCPRVHRFSVLKFM MYAFMLVTIFMTVFGNLLVIITISHF  
KQLHSPTNLIILSLALVDCMMGCLVMPFTMVRWVEGCWFLGDFLCQIHSSLDMTISIASILHLCL  
VSVDRYVAICEPLQYRMKVTNSKIAVCLATIWLFSLSFGFGIVLSKVNALGLD TVVTPCVGYCAL  
TFNKEWSVIGSLNFFI PGTIMSCLYLKI FCVARKQAKVM SERTAVVKPCETSHSSEQRERKAAK  
TLGIVMGFFLLCWL PFFMANLIDPFLNFMT PVDVFDALIWLAYFN SMCNPLIYGGFFYPRFQRAFK  
IIISRYVLR LSDANNLIL\*

### >Pyn-taar12e

MDMLFVNKTDVENVLLCFPHQPDSCAGKHRFLVLRVAMYVCM LLA ILMTVFGNLLVIVSISHFKQ  
LHSPTNFIIILSLAWVDSLLGCLVMPFMSVRWVEGCWLLGELFCQIHSSLDMTLSIASILHLCLVS  
IDRFVAICEPLSYRMKVTNANVAVCI AVIWLFS CVFSFGIVFSKVNVM DLDEHMLNPCVGN CALV  
FNKEWGVIA PLLNFYI PGTIMSCLYLKI FYVARRQAKVISVGTAVTSGEKSQVSEQRERKAAKTL  
GIVMGVFLLCWL PFFLTVIDPFLGFSTPVEVFDALVWFGYFN SSMFNPLIYGGFFYPRFQKAFKII  
ISRSVCRSTNSNFVLQ\*

## ***Sinocyclocheilus anshuiensis***

### >Sa-taar12a

MTSNETDIYPENVFFCYPLL PDSCPRAHRLPALKVAMYVLMVLMILTTVFGNLLIIISISHFKQL  
QSPTHLIVRSLAASDCLLGSLVMPYSMVRSVEGCWYLGDFVCKVHSSLDMTFSISSLIHLSLISV  
DRYWAICDPLRYKMRVTNNIVTVFTTFTWLF SFLYSFSIVFSGINKIGLESFIMQVYCVGSCVLF  
FNKQWGLICSLLTFFLPGTIMSSLYMNI FYVARKHAKVM SERVTGGLKSQGS AQREGKAAKTLAI  
VMGVFYLCWL PFFTATAVDPFLNFVTPGDVFDALVWFGYFN STCNPLIYGGFFYPRFQKAFKILIS  
TYTCGCNDSSTLILE\*

### >Sa-taar12b

MNLVNVI TVDFQKLSG I TVVFFCYPLL PDSCPRAHRLPALKVAMYVLMVLMILTTVFGNLLIIIS  
ISHFKQLQSPTHLIVRSLAASDCLLGSLVMPYSMVRSVEGCWYLGDFVCKVHSSLDMTFSISSLI  
HLSLISVDRYWAICDPLRYKMRVTNNIVTVFTTFTWLF SFLYSFSIVFSGINKIGLESFIMQVYCV  
VGSCVLF FNKQWGLICSLLTFFLPGTIMSSLYMNI FYVARKHAKVM SERVTGGLKSQGS AQREGK  
AAKTLAIVMGV FYLCWL PFFTATAVDPFLNFVTPGDVFDALVWFGYFN STCNPLIYGGFFYPRFQK  
AFKILISTYTCGCNDSSTLILE\*

### >Sa-taar12c

MTLNKTDIYFENMFLCYPLL PNSCPKLHRLTVVKVAIYILMVLMI LTTVFGNLLIIISISHFKQL  
QSPTHLIVRSLASSDCLLGSLVMPYSMVRSVEGCWYLGDFVCKVHSSLD MRF CISSILHLSLISV  
DRYMAICDPLRYRMRVTDKTVAVFITFIWLFSILYSFFIVFSGVNMKGLESFILQVYCVGSCVLF  
FNKQWGIICPILTFFLPGTIMSSLYMKI FYVAQKHAKMM SERVTVMAAGGLKSQSSVHRERKAAK  
TLAIVMGVFLFYWLPIFIATIIDSFLNL!  
TPASVFDALVWFGYFN STCNPLIYGGFFYSRFQKAFKILISSSIYGFIDSSTFT

>Sa-taar12d

MTSNETNTQIVFLCYPLRPDSCLKVQRYVVVKVAMYVFLVLMILTTVFGNLLIIISISHFKQLQS  
PTHLIVRSLASSDCLLGSLVMPYSMVRSVEGCWYLGDFVCKVHSSLDMSFCISSILHLSLISVDR  
YMAICDPLRYIMRVTNNTVTAFIIFIWLFSEFVYSFSVVFSGINAVGLEMLILQTHCVGSCVLFNFN  
KQWGIICPILTFFFLPGSIMSSLYMKIFYVAQKHAKVMSEKVTGRLKSQSSAHRERKAAKTLAFVM  
GVFLFCWLPFFFTVTALDPFFNFFTPAIVFDVAVIWFAYLNSTCNPLIYGFFYPFCFQSAFKILISTY  
ICGNKDCNTLVFE\*

***Sinocyclocheilus grahami***

>Sg-taar12a

MTSNETDIYPENVFFCYPLLPDSCPRAHRLPALKVAMYVLMVLMILTTVFGNLLIIISISHFKQL  
QSPHLIVRSLAASDCLLGSLVMPYSMVRSVEGCWYLGDFVCKVHSSLDMTFSISSLIHLISLISV  
DRYWAICDPLRYKMRVTNNTVTVFSTFWLFSFLYSFSIVFSGINKIGLESFIMQVYCVGSCVLF  
FNKQWGLICSLLTFFFLPGTIMSSLYMIIFYVARKHAKVMSEKVTGGLKSQGSAREGKAAKTLAI  
VMGVFYLCWLPFFFTATAVDPFLNFVTPVDVFDALVWFGYFNSTCNPLIYGLFYPRFQKAFKILIS  
TYICGCNDSSTLILELI\*

>Sg-taar12b

MTSNETDIYPENVFFCYPLLPDSCPRAHRLPALKVAMYVLMVLMILTTVFGNLLIIISISHFKQL  
QSPHLIVYSLAASDCLLGALVMPYSMVRSVEGCWYLGDFVCKVHSSLDMTFSISSKIHLGLISV  
DRYWAICDPLRYKMRVTNNTVTVFSTFAWLFSFLYSFSIVFSGINIIGLESFIMQVYCVGSCVLF  
FNKQWGLICSLLTFFFLPGTIMSSLYMKIFYVARKHAKAMSEKVTGGLKSQGSAREGKAAKTLAI  
VMGVFYLCWLPFFFTATAVDPFLNFVTPVDVFDALVWFGYFNSTCNPLIYGLFYPRFQKAFKILIS  
TYICGCNDSSTLILELI\*

>Sg-taar12c

MTLNKTDIYFENMFLCYPLLPDSCPKLHRLTVVKVAIYILMVLMLTTVFGNLLIIISISHFKQL  
QSPHLIVRSLASSDCLLGSLVMPYSMVRSVEGCWYLGDFVCKVHSSLDMSFCISSILHLSLISV  
DRYMAICDPLRYRMRVTNNTVTVFITFIWLFSELYSFFIVFSGVKNIGLESFILQVYCVGSCVLF  
FNKQWGIICPILTFFFLPGTIMSSLYMKIFYVAQKHAKIMSEKVTVMAARGLKSQSSVHRERKAAK  
TLAIVMGVFLFCWLPFIFISTIIDSFNFVTPASVFDALVWFGYFNSTCNPLIYGFFYSRFQKAFK  
ILISSCIYGFIDSSTFTFE\*

>Sg-taar12d

MTSNETYQIVFHFCYPLRPDSCLKVQRYVVVKVAMYVFLVLMILTTVFGNLLIIISISHFKQLQS  
PTHLIVRSLASSDCLLGSLVMPYSMVRSVEGCWYLGDFVCKVHSSLDTSFCISSLLHLSLISVDR  
YMAICDPLRYRMRVTNNTVTAFIIFIWLFSEFVYSFSVVFSGINAVGLEMLILQTHCVGSCVLFNFN  
KQWGIICPILTFFFLPGTIMCSLYMKIFYVAQKHAKVMSEKVTGGMKSQSSAHRERKAAKTLAIVM  
GVFLFCWLPFFFTVTALDPFFNFFTPAVVFDVAVIWFAYLNSTCNPLIYGFFYPFCFQSAFKILISTY  
ICGNKDCNTLVFE\*

### >Sg-taar12e

MTSNETQTENMFLCYPLRLDSCCLKPHRLTVVKVAMYITLMVLMILTTVFGNLLIIISISHFKQLQS  
PHTHLIVRSLAASDCLLGSLVMPYSMVRSVEGCWYLGDFVCKVHSSLDMSFCISSILHLSLISVDR  
YMAICDPLRYGMRVTNNTVTVFIIIFIWLFSEFVYSFSVVFSGITAVGLEMLILQTYCVGSCAVFFN  
KEWGIICSVLTLFLPGTIMSSLYLKIIFYVARKHAKVMSEMTGGMKSQSSVHRERKAAKTLAIVM  
GVFLLCWLPYFTAALLDPFFNFVTPAVVFDVAVIWFAYFNSTCNPLIYGFFYPYFQKAFKILISTY  
ICGIKHSNTLIFE\*

### >Sg-taar12f

MIANETDIESVFLCYPLRPDSCCLRAHRLTVLKVAMYVFMVLMILTTVFGNLLVIIISISHFKQLQS  
PHTHMIVQSLAACDCLLGSLVMPYSMVRSVEGCWYLGDDVCKVHSSLDMTFSISSILHLSLIAIDR  
YWAICDPLRYKMRVTNNTVTVFITFTWLFSEFVYSFSVVFSGVNNVGLLEELILQISCFGGCVLFFN  
KEWGLICALFVFLIPGTIMSSLYMSIFNVVKKHAKVLSEKVSVAPTVGGNCQTSSQRERKAAKTL  
AIVMGVFYLCWLPFFTATAIDPFLNFVTPVDVFDALVWFGYFNSTCNPLIYGFFYPRFQKAFKIL  
ISTYICGISESHTLTFE\*

## ***Sinocyclocheilus rhinoceros***

### >Sr-taar12a

MTSNETDIYPENVFFCYPLLPDSCPRAHRLPALKVAMYVLMVLMILTTVFGNLLIIISISHFKQL  
QSPTHLIVRSLAASDCLLGSLVMPYSMVRSVEGCWYLGDFVCKVHSSLDMTFSISSLIHLSLISI  
DRYWAICDPLRYKMRVTNNTVTVFITFTWLFSEFLYSFSIVFSGINKIGLESFIMQVYCVGSCVLF  
FNKQWGLICSLLTFFLPGTIMSSLYMNIIFYVARKHAKVMSEVTGGLKSQGSAREGKAAKTLAI  
VMGVFYLWCWLPFFTATAVDPFLNFVTPGDVFDALVWFGYFNSTCNPLIYGFFYPRFQKAFKILIS  
TYICGCNDSSTLILE\*

### >Sr-taar12b

MTSNETDIYPENVFFCYPLLPDSCPRAHRLPALKVAMYVLMVLMILTTVFGNLLIIISISHFKQL  
QSPTHLIVCSLTASDCLLGSLVMPYSMVRSVEGCWYLGDFVCKVHSSLDMTFSISSLIHLSLISI  
DRYWAICDPLRYKMRVTNNTVTVFITFTWLFSEFLYSFSIVFSGINKIGLESFIMQVYCVGSCVLF  
FNKQWGLICSLLTFFLPGTIMSSLYMNIIFYVARKHAKVMSEVTGGLKSQGSAREGKAAKTLAI  
VMGVFYLWCWLPFFTATAVDPFLNFVTPGDVFDALVWFGYFNSTCNPLIYGFFYPRFQKAFKILIS  
TYICGCNDSSTLILE\*

### >Sr-taar12c

MTLNKTDIYFENMFLCYPLLPNSCPKLRHRLTVVKVAMYVLMVLMILTTVFGNLLIIISISHFKQL  
QSPTHLIVRSLASSDCLLGSLVMPYSMVRSVEGCWYLGDFVCKVHSSLDMSFCISSILHLSLISV  
DRYMAICDPLRYRMRVTNKTVAVCITFIWLFSEILYSFFIVFSGVNKISLESFILQVYCVGSCVLF  
FNKQWGIICPILTFFFPGTIMSSLYMKIIFYVAQKHAKIMSERVTVMAAGGLKSQSSVHRERKAAK  
TLAIVMGVFLFCWLPIFIATIIDSFLNFVTPASVFDALVWFGYFNSTCNPLIYGFFYSRFQKAFK  
ILLISSCIYGFIDSSTFIFE\*

### >Sr-taar12d

MTSNETNTQIVFLCYPLRPDSCCLKVQRYVVVKVAMYVFLVLMILTTVFGNLLIIISISHFKQLQS  
PHTHLIVRSLAASDCLLGSLVMPYSMVRSVEGCWYLGDFVCKVHSSLDTSFCMSSLLHLSLISVDR

YMASCDPLRYMRVTNNTVTAFIIFIWLFSEVYSFSVVFSGINAVGLEMLILQTHCVGSCVLFNF  
KQWGIICPILTFFLPGTIMSSLYMKIFYVAQKHAKVMSEMTGRLKSQSSAHRERKAAKTLAFVM  
GVFLFCWLPFFFTVTALDPFFNFFTPAVVCCQVHSPDT\*

#### >Sr-taar12e

MTSNETQTENMFLCYPLRPDSCCLKVHRLTVIKVAMYVLVLMILTTVFGNLLIIISISHFKQLQS  
PTHLIVRSLASSDCLLGSVMPYSMVRSVEGCWYLGDFVCKVHSSLDMSFCISSLLHLSLISVDS  
YWAICDPLSQVRMRVTNNTVTVFITFIWLFSEVYSFSVVFSGITAVGLEMLILQTYCVGSCVVF  
NKQWGIIVCPILTFFLPGTIMSSLYLKIIFYVARKHAKVMSEMTGGMKNQSSAHRERKAAKTLAIV  
MGVFLLCWLPYFTATVLDPFFSFWTPAVVFDALFWFAYFNSTCNPLIYGFFYPYFQKAFKILIST  
YICGIKHSNTLIFE\*

#### >Sr-taar12f

YSMVRSVEGCWYLGDVVCKVHSSLDMTFSSISILHLSLIAIDRYWAICDPLRYKMRVTNNTVTVF  
ITFTWLFSEVYSFSVVFVFTGVNNGLEELILQISCFGGCVLFFNKEWGLICALFVFLIPGTIMSSL  
YMSIFNVVKKHAKVLSEKVSVAPTVGGNCQTSSQRRERKAAKTLAIVMGVFLCWLPPFTATAIDP  
FLNFVTPVDVFDALVWFGYFNSTCNPLIYGFFYPRFQKAFKILISTYICGI

#### >Sr-taar12g

MYCIYINLSLHICLYHVIIYEIILGTIWSIFEWLFTFTKQTLCSLAYQSLFEAHVMIANETDIE  
NVFLCYPLRPDSCPRAHRLTILKVAMYVFMVLMILTTVFGNLLVIIISISHFKQLQSPHMIQVSL  
AACDCLLGSVMPYSMVRSVEGCWYLGDFVCKVHSSLDMTFSSISKIHLGLISVDRYWAICDPLR  
YKMRVTNNIVTVFTFTFTWLFSEVYSFIVFSGINKIGLESFIMQVYCVGSCVLFNFKQWGLICSL  
LTFFLPGTIMSSLYMNIIFYVARKHAKVMSEMTGGLKSQGSAQREGKAAKTLAIVMGVFLCWL  
PFTATAVDPFLNFVTPGDVFDALVWFGYFNSTCNPLIYGFFYPRFQKALTVNHSATLPHKPG\*

### **TAAR 13**

#### ***Anguilla anguilla***

##### >Aa-taar13a

MDILKHQELNASQLCYPSVNGSCIKINQTWAAQFISYIFLVAGMIFTILGNLVVIIISIAHFKQLH  
TPTNILVMSLAAADLLLGIVVIFFSMIRSVDGCWYFGDAFCLLHSSFDLFLTCASLFHLIFIAID  
RYQAVCNPLHYSTRITIPIAWLMSALSWSVIAGVYSYGLLYSKANVKGLEEHIASIYCFGSCILLF  
NSLWGVLDTLIAFFLPCCIMMGLYAKIFFVXPSSSNMNLFIER

##### >Aa-taar13b

MDILKHQDLNAPQFCFPSVNGSCIKISQTWAAQFIFYIFFVAGMIFTILGNLVVIIISIAHFKQLH  
TPTNILVMSLAVADLLLGVMVMPFSMIRSVEGCWYFGDAFCLLHSSFDMFLTCASLFHLIFIAID  
RYQAVCNPLHYSTRITIPIAWLMSALSWSVIAGVYSYGLLYSKANVKGLEAHIASIYCLGSCILLF  
NSLWGVLDTLIAFFLPCCIMMGFYVKIFFVAREHVRKIGDMNHQKQLNEENKNKLSRSSERKAAK  
TLGIVMGVFLCWMPPFFVNMIIDPYTNFSTPVIIFDVLVWLGYFNSTLNPIIYSLFYFPWFQKTFK  
IIVSLKILTPNSSNINLFTER

>Aa-taar13c

HSSFDMFLTSVSI FHLISIAIDRYQAVCNPLHYSTRITIPIAWLMSALS SWVIAAAYS YGLLYSKA  
NVKLEDYIASIYCLGDCVLLFNALWGALDTLIAFFLPCFVMMGLYTKIFLVAREHARKIEDMKH  
KITVNEENRNKPSQRSEQKAAKTLGIVVGVFIICWLPFFVNSLIDPYTNFATPAIVFDVFWLGY  
FNSTLNPIIYALFYPWFQKTLKLIIVTFKIIFTPHSSNINVFPER

>Aa-taar13d

MDDLHVHQEPDAQEYYPSTNGSCIKGNQSI AAQVMLYIFFVTGMIF TILGNLVV IISIAHFKQLH  
SPTNILVMSLAVVDLLLGMVMPFSMIRSV EGFWYFGDAFCLLHSSFDMFLTCASIFHLIVIAID  
RYQAVCNPLHYSTRITIPIAFLMSALS WIIAAAYS YALLYSKANVKGVEDDVASINCLGGCVLLF  
NAVWGPLDTMIEFFVPCFVMMGLYTKIILVAREHARK

>Aa-taar13e

DAQQYCPAINGSCIKGNHTIAAQVILYIFFVAGIIFTVLGNLVV IISITHFKRLHTPTNILVMS  
LAVADMLLGMVMPFSMVRSVAGCWYFGEVFCQLHSSFDMFLATVSI FHLICIAIDRHEAVCNPL  
HYSRRITIPIAFLMSTLSWSIAAAYS YGLLYSKADEKGVEDYIASIHCLGSCFPFVLSFNALWGV  
LDSLIAFFVPCVIMMGLYAKIYLVAREHARKIEGMNKRVPVNEENRNKLSQGSEQKAAKTLGIVV  
SAFIVCWLPFFINSLIDPYTTFFSTNSPVLSDAFVWLG YFN SGLNPIIYGLFYPWFQKTLKLIITF  
KIIFTPHSSNINVF SER

**Anoplopoma fimbria**

>Af-taar13a

MMSRGLSQEQYCFPGSNASCVTAQFSMGTEVALYLLFSLGILITILGNSVVI VSI GHFKQLHNPT  
NVLILSLALADLLVGVIVMPFSAIRTIHG CWFYGDDFCLLHSSFDMFLTSVSI FQLICIAVDRQQ  
AICNPLHYSRNITMSVAWIMVCASWSLAAVYS YGLLYSKANVAGIEDYMSSINCLGSCNLVFNHI  
WGILDGVTAFFFPCTVMVCLYTKIFIVAKDHVRKIGDMSKGSNNRGRGGLIKQSEHKAAKTLGIV  
LGAFIFCWMPFFINSIIDAYTG FSTPASVFEAFVWLG YFNSTLNPIIYALFY

>Af-taar13b

IVSIGHFKQLHNPTNVLILSLALVDLLVGVIVMPFSAIRTIHG CWFYGDDFCLLHSCLDVFLTTL  
SIFHLISIAIDRQQAICNPLHYSRNITXSVAWIMVCASWSLAAVYSXGLLYSKANVAGIEDYMSS  
INCLGSCNLVFNHIWGILDGVTAFFFPCTVMVCLYTKIFIVAKDHVRKIGDMSKGSNNRGRGGLI  
KQSEHKAAKTLGIVLGAFIFCWMPFFINSIIDAYTG FSTPASVFEAFVWLG YFNSTLNPIIYALF  
Y

**Anguilla japonica**

>Aj-taar13a

MDILKHQELNAPQFCYPSVNGSCIKINQ TWAAQFISYIFLVAGMIF TILGNLVV IISIAHFKQLH  
TPTNILVMSLAAADLLLGI VVI PFSMIRSV DGCWYFGDAFCLLHSSFDLFLTCASL FHLIFIAID  
RYQAVCNPLHYSTRITIPIAWLMSALS WVIAGVYS YGLLYSKANVKGMEEHIASIYCFGSCILLF  
NSLWGVLDTLIAFFLPCCIMMGLYAKIFFVAREHVRKIGDMNHRKHLNEENKNKLSR SSERKAAK  
TLGIVMGV F ILCWMPFFVNMIIDLYTNLSTPFIIVEVLFVWLG YFNSTLNPIIYSLFYPWFQKTFK  
LIVSLKILNPNSNMNLF TER\*

>Aj-taar13b1

MDILKHQELNAPQFCFPSVNGSCIKISQTWAAQFILYIFFVAGMIFTILGNLVVVIISIAHFKQLH  
TPTNILVMSLAVADLLLGMVMPFSIIRSVEGCWYFGDAFCLLHSSFDMFLTTCASLFHLIFIAID  
RYQAVCNPLHYSTRITITPIAWLMSALSWSVIAGVYSYGLLYSKANVKGLEAHIASMYCLGSCILLF  
NSLWGVLDTLIAFFLPCSIMMGF!  
YVKIFFVAREHVRKIGDMNHQKHLNEENKNKLSRSSERKAAKTLGIVMGVFILCWMPFFVNMIID  
PYTNFSTPLIVFDVLVWLG YFNSTLNPIIYSLFY PWFQKALKLIVSLKILTPSSSNMNLFIER\*

>Aj-taar13b2

MDILKHQELNAPQFCYPSVNGSCIKISQTWPAQFILYIFFVAGMIFTILGNLVVVIISIAHFKQLH  
TPTNILLMSLAAADLLLGMVMPFSMIRSVEGCWYFGDDFCLLHSSFDMFLTTCASLFHLIFIAID  
RYQAVCNPLHYSTRITITPIAWLMSALSWSVIANVYSYGLLYSKANVKGLEDHIASMYCLGNICILLV  
NSLWGVLDSLIAFFLPCSIMMGFYAKIFFVAREHVRKIGDMNHQKHLNEENKNKLSRSSERKAAK  
TLGIVMGVFILCWMPFFVNLIIDPYINFSTPVIVFDVLVWLG YFNSTLNPIIYSLFY PWFQKTFK  
IIVSLKILNPNSSNMNLFPER\*

>Aj-taar13c

MEALVHQEPDAQQYCY PSTNGSCIKGNQPIAAQVILYIFFVVTGMIITILGNLVVVIISIAHFKQLH  
TPTNILVMSLAVADLLLGMVMPFSMIRSVEGCWYFGDAFCLLHSSFDMFLTSVSI FHLISIAID  
RYQAVCNPLHYSTRITITPIAWLMSALSWI IAAAYS YGLLYSKANVKGLKDYIASIYCLGDCVLLF  
NALWGALDTLIAFFLPCFVMMG

>Aj-taar13d1

MHRNTIIPQLXXXXXXXXXXXXXXXXXXXXXXXXXXXXXXXXXXXXXXXXXXXXXXXXXXXXXXXXXXXX  
XXXXXXXXXXXXGMVMPFTMIRSVEGFYFGDAFCLLHSSFDMFLT CASIFHLIFIAIDRYQAVC  
NPLHYSTRITITPIAFLMSALSWI IAAAYS YGLLYSKANVKGVEDDVASINCLGGCVLLFNALWGP  
LDTFIEFFVPCFVMMGLYTKIFLVAREHARKIEDMKHKITVNEENRNKPSQRSEQKAAKTLGIVV  
GVFIICWLPFFVNSLIDPYTNFATPAIVFDVFWLGYFNSTLNPIIYALFY PWFQKTLKILVTFK  
IFAPHSSNINVFPER\*

>Aj-taar13d2

DLVHQEPDAQEYYPSTNGSCIKGNQSIAAQVTLYIFFVAGMILTILGNLVVVIISIVHFKQLHTP  
TNVLVMSLAVVDLLLGMVMPFSMIRSVEGFYFGDAFCLLHSSFDMFLT CASIFHLIFIAIDRI  
AIDRYQAVCNPLHYSTRITITPIAFLMSALSWI IAAAYS YALLYSKANVKGVEDDVASIYCLGGCV  
LLFNNAVWGPLDTMIEFFVPCFVMMGLYTKIILVAREHARKIEDMKHKITVNEENRNKLSQRSEQK  
AAKTLGIVVSAFIICWFPFFSNLIDPYTDFATPPIVFDVFWLGYFNSTLNPIIYGLFY PWFQK  
TLKLIITLKIFTPHSSNINVFS

>Aj-taar13e

MDALVHQEPDAQQYCYPAINGSCIKGNHTIAAQVILYIFFVAGIIFTVLGNLVVVIISITHFKQLH  
TPTNILVMSLAAADMLLGMVMPFSMVRSVAGCWYFGEVFCQLHSSFDMFLATVSI FHLICIAID  
RHEAVCNPLHYSARITITPIAFLMSALSWS IAAAYS YGLLYSKADEKGVEDYIASIHCLGSCFPFV  
LSFNALWGVLDSLIAFFVPCVIMMGLYAKIYLVAREHARKIEGMNRKRPVNEENKHKLSQGSEQK

AAKTLGIVVSAFIVCWLPPFFINSLIDPYTTFFSTNSPVLSDAFVWLG YFN SGLNPIIYGLFY PWFQ  
KTLKLIITFKI FT PHSSNINVF SER

>Aj-taar13f

MDALVLQKPDAQQY CYPSTNGSCFKGNQPIAAQVILYIFFVVTGMIITILGNLVV IISIAHFKQLH  
TPTNILVMSLAVADLLL GMLVMPFSMIRSVDGCWYFGDAFCLLHSSYDMFLATASIFHLIFIAID  
RHEAVCNPLHYSTRITIP IAF LMSALS WI IAAAYS YGLLYSKADV KGLE DY IASLHCLGR CVHFV  
LSLNALWGVLDTLIAFFVPCFVMMGLYAKIYLVAREHARKIGGMNHKRPVNEENKHKLSQGSEQK  
AAKX

>Aj-taar13g

MEALVHQEPDAQQY CYPSTNGSCFKGNQPIAAQVILYIFFVVTGMIITILGNLVV IISIAHFKQLH  
TPTNILVMSLAVADLLL GMLVMPFSMVRSVDGCWYFGDAFCLLHSSYDMFLATASIFHLIFIAID  
RHQAVCNPLYSTRITIP IAF LMSALS WS IAAAYS YGLLYSKADV KGLE DY IAS IHC FGGCVHFV  
LSFNALWGVLDTLIAFFVPCFVMSLYAKIFLVAREHARKIGGINHKIPVNEENKHKLSQGSEQK  
AAKTLGIVMSVFLICWLPFCFVNSLIDPYTTFFSANHVVS DAFVWLG YFN STL NPIIYGLFY PWFQK  
TLKLXKVIVCKVVLQANFTISKNAVL\*

***Astyanax mexicanus***

>Am-taar13a

MESYLTEEADLSQY CYPESNASCVKSFYSVGAKSVLYFLLILAMAVTVLGNFVVIVSIAHFKQLH  
TPTNILVMSLALADLFVGMIVMPFSTIRSVDGCWYFGQGFCLLHSSFDMLLTSASIFHLVCIATD  
RYQAVCHPLHYPTRIPIPTAWLMVALSWTTAAVSYGLMYSKANVANLEEYMESIFCVGSCDLLF  
NALWGALDTLIGFLLPCSVMGCLYAKIFLVSKKHATKIEGKKQCKKGTSMNMVVSQSVKHENKAAK  
TLGIVVGAFILCWMPFFVNSIVDPYINFSTPAVLFEVLVWLG YLN STL NPIIYGLFY PWF RKS LY  
LIVTLRI FT PHSSDTNIFLA\*

***Anguilla rostrata***

>Ar-taar13a

MDILKHQELNASQFCYPSVNGSCIKINQ TWAAQFISYIFLVAGMI FTILGNLVV IISIAHFKQLH  
TPTNILVMSLAAADLLL GIVVIPFSMIRSVDGCWYFGDAFCLLHSSFDLFLT CASL FHLIFIAID  
RYQAVCNPLHYSTRITIP IAWLMSALS WVIAGVSYGLLYSKANVKGLEEH IAS IYCFGSC ILLF  
NSLWGVLDTLIAFFLPCCIMMGLYAKIFFVAREHVRKIGDMNHRKHLNEENKNKLSRSSERKAAK  
TLGIVMGVFILCWMPFFVNMIIDLYTNLSTPFIIVEVLFWLG YFN STL NPIIYSLFY PWF QKTFK  
LIVSLKILNPSSSNMNL FIER\*

>Ar-taar13b1

MDILKHQELNAPQFCYPSVNGSCIKISQ TWAAQF ILYIFFVAGMI FTILGNLVV IISIAHFKQLH  
TPTNILLMSLAAADLLL GMVMPFSMIRSVEGCWYFGDAFCLLHSSFDMFLTCASL FHLIFIAID  
RYQAVCNPLHYSTRITIP IAWLMSALS WVIAGVSYGLLYSKANVKGLEAHIAS IYCLGN CILLV  
NSLWGVLD SLIAFFLP CSIMMGFYAKIFFVAREHVRKIGDMNHQKHLNEENKNKLSRSSERKAAK  
TLGIVMGVFILCWMPFFVNLIIDPYINFSTPVIIFDVLVWLG YFN STL NPIIYSLFY PWF QKTFK  
IIVSLKILTPSSSNINL FIER\*

>Ar-taar13b2

MDILKHQDLNAPQFCFPSVNGSCIKISQTWAAQFILYIFFVAGMI FTILGNLVV IISIAHFKQLH  
TPTNILVMSLAVADLLLGMVMPFSMIRSVEGCWYFGDAFCLLHSSFDMFLT CASLFHLIFIAID  
RYQAVCNPLHYSTRITIP IAWLMSALS SWVIAGVYSYGLLYSKANVEGLEAHIASIYCLGSCILLF  
NSLWGVLDTLIAFFLPCSIMMGFYVKIFFVAREHVRKIGDMNHQKQLNEENKNKLSR SSERKAAK  
TLGIVMGVFILCWMPFFVNMIIDPYTNFSTPVIIFDVLVWLGYFNSTLNPIIYSLFY PWFQKALK  
LIVSLKILTPSSSNMNL FIER\*

>Ar-taar13c

MDALVHQEPDAQQY CYPSTNGSCFKGNQPIAAQVILYIFFVTGMIITIFGNLVV IISIAHFKQLH  
TPTNILVMSLAVADLLLGMVMPFSMIRSVEGCWYFGDAFCLLHSSFDMFLTSV SIFHLISIAID  
RYQAVCNPLHYSTRITIP IAWLMSALS WI IAAAYSYGLLYSKANVKGLEDYIASIYCLGDCVLLF  
NAVWGALDTLIAFFLPCFVMMGLYTKIFLVAREHARKIEDMKHKITVNEENRNKPSQRSEQKAAK  
TLGIVVGVFIIICWLPFFVNSLIDPYTNFATPAIVFDVFWLGYFNSTLNPIIYALFY PWFQKTLK  
LIVTFKIIFTPHSSNINVFPER\*

>Ar-taar13d1

MDDL VHQEPDAQEY YYPSTNGSCIKGNQSI AAQVMLYIFFVTGMI FTILGNLVV IISIAHFKQLH  
TPTNILVMSLAVVDLLLGMVMPFSMIRSVEGFWYFGDAFCLLHSSFDMFLT CASIFHLIVIAID  
RYQAVCNPLHYSRRITIP IAF LMSALS WVI AAAYSYALLYSKANVKGVEDDVASIYCLGGCVLLF  
NAVWGPLDTMIEFFVPCFVMMGLYTKI I LVAREHARKIEDMKHKITVNEENRNKLSQRSEKAAK  
TLGIVVSVFIIICWLPFFS NSLIDPYTDFGTSPIVF DAFVWLGYFNSTLNPIIYGLFY PWFQKTLK  
LIITLKIIFTPHSSNINVF SER\*

>Ar-taar13d2

MDDL VHQEPDAQEY YYPSTNGSCIKGNQTIAAQVTLYIFFVTGMI FTILGNLVV IISIAHFKQLH  
TPTNILVMSLAVVDLLLGMVMPFTMIRSVEGFWYFGDAFCLLHSSFDMFLT CASIFHLIFIAID  
RYQAVCNPLHYSTRITIP IAF LMSALS WI IAAAYSYALLYSKANVKGVEDDVASINCLGGCVLLF  
NAVWGPLDTMIEFFVPCFVMMGLYTKI I LVAREHARKIEDMKHKIPVNEENRNKLSQRSEQKAAK  
TLGIVVSAFIIICWLPFFS NSLIDPYTNFATPPIVFD AFGWLGYFNSTLNPIIYGLFY PWFQKTLK  
LIITLKIIFTPHSSNINVF S\*

>Ar-taar13e

MDALVHQEPDAQQY CYPAINGSCIKGNHTIAAQVILYIFFVAGIIFTVLGNLVV IISITHFKRLH  
TPTNILVMSLAVADMLLGMVMPFSMVRSVAGCWYFGEVFCQLHSSFDMFLATV SIFHLICIAID  
RHEAVCNPLHYSRRITIP IAF LMS T L S W S I AAAYSYGLLYSKADEKGVEDYIASIHCLGSCFPFV  
LSFNALWGVLD SLIAFFVPCVIMMGLYAKIYL VAREHARKIEGMNNKRPVNEENRNKLSQGSEQK  
AAKTLGIVVSAFIVCWLPFFINSLIDPYTTTFSTNSPVLSDAFVWLGYFNSGLNPIIYGLFY PWFQ  
KTLKLIITFKIIFTPHSSNINVF SER\*

>Ar-taar13f

MDALVHQEPDAQQY CYPSTNGSCFKGNQPIAAQVILYIFFVTGMIITILGNLVV IISIAHFKQLH  
TPTNILVMSLAVADLLLGMVMPFSMIRSV DGCWYFGDAFCLLHSSYDMFLATASIFHLIFIAID



RHQAVCNPLHYSTRITIPIAFLMSTLSWIIAAAYSYGLLYSKADVKGLEDYIASIHCLGGCVHFV  
LSFNALWGVLDTLIAFFVPCFVMMSLYAKIFLVAREHARKIGGMNRKIPVNAENKHKLSQGSEQK  
AAKTLGIVMSVFIICWLPCFVNSLIDPYTTFSANHVVS DAFVWLGYFNSTLNPIIYGLFYPWFQK  
TLKLIITFKIFTPSSNINVSER\*

## ***Cyprinus carpio***

### >Cc-taar13a

MDLSSQEYDSTQFCYPVAVNKSCCLKGTHHVSTQTVVYLLLVLAMIVTILGNLVVVIISIAHFKQLQT  
PTNILVMSLALADLLLGLVVMPPFSMIRSV DGCWYYGDAFCLLHSTFDLFLTSVSI FHLIFIAIDR  
HQAAVCYPLQYPTRITISVAWVMVMI SWSMAALYSYGLVYSKANVEGLEEYIESIYCMGSCTLLF  
NALWGAI DTLVAFLLP CSVMVGLYARIFVIAKQHARKLCEANQQENENMFKSSRRSERKAAKTLG  
VVVGAFIICWL PFFINSLIDPYINFSTPIALFEVFWLGYINSTINPIIYGLFYPWFRKTL SLII  
TMRIFEPNSSDINVFTV\*

### >Cc-taar13b

MDLSSQEYDPTQFCYSAVNNSCLKGTHHVSTQTA VYLLLVLAMIVTILGNLVVVIISIAHFKQLQT  
PTNILVMSLALADLLLGLVVMPPFSMIRSV DGCWYYGDAFCLLHSSFDLFLTSVSI FHLIFIAIDR  
HEAVCYPLQYPTRITISVAWIMVMI SWSMAALYSYGLVYSKANLEGLEEYIESIYCMGSCTLLFN  
ALWSVLD TLLTFFLP CSVMIGLYARIFV VARKHIRTIGE ANHHENESTFKSSRRSERKAAKTLGV  
VVGAFIICWL PFFINSLIDPYISFSTPFALFEAFVWLGYINSTINPIIYGLFYPWFRKTL SLIIR  
LKIFEPNSSDISVFTV\*

### >Cc-taar13c

MDLSSQEYSPTQFCFPVAVNNSCLKGTHHVSTQTVVYLLLVSAMIVTILGNSVVVIISIAHFKQLQT  
PTNILVMSLALADLLLGLVVMPPFSMIRSV DGCWYYGDAFCLLHSSFDLFLTSVSI FHLIFIAIDR  
HQAVCYPLQYPTRITIPVAWVMVMI SWSMAALYSYGLVYSKANVEGLEEYSES IYCMGSCTLLFN  
SLWSVLD TLLTFFLP CSVMIGLYARIFV VAKKHIRTIGEASQHENENMFKSSRRSERKAAKTLGV  
VVGAFIICWL PFFINSLMDPYINFSTPFVLFDAFGWFGYINSTINPIIYGLFYPWFRKSLSLIIT  
MRIFEPNSSDINVFTV\*

### >Cc-taar13d

MDLSSQQYDPTQFCFPVAVNNSCLKGTHHVSTQTVVYLLLVSAMIVTILGNSVVVIISIAHFKQLQT  
PTNILVMSLALADLLLGLVVMPPFSMIRSV DGCWYYGDAFCLLHSTFDLFLTSVSI LHLVLCIAIDR  
HQAVCYPLQYPTRITIPVAWVMVMI SWAMIAVYSYGLLYSKANVEGLEEYIESIYCI GHCSLLFS  
NLWSVLD TLTITFFFPC SVMFGLYVRIFV VAKKHVRTI SEANQHENENVFKSSRRSERKAAKTLGV  
VVL PFFINSVMDPYINFSTPLALFEVFWLGYINSTINPIIYGFYYPWFRKTL SLIVTRRIFEPN  
SSDINVFTV\*

### >Cc-taar13e

KKQHFIGSSFLKLRGFKGTHHVSTQTVVYLLLVSAMIVTILGNSVVVIISIAHFKQLQTPTNILVM  
SLALADLLLGLVVMPPFSMIRSV DGCWYYGDAFLFAAIPPLTFLASVFYFPFLFVLLLSIAIDRH  
QAVCYPLQYPTRITIPVAWVMVMI SWAMIAVYSYGLLYSKANVEGLEEYIESIYCI GHCSLLFSN  
LWSVLD TLTITFFFPC SVMFGLYVRIFV VAKKHVRTI SEANQHENENVFKSSRRSERKAAKTLGV

VGAFIICWLPFFINSVMDPYINFSTPLALFEVFWLGYINSTINPIIYGFFYPWFRKTLSLIVTR  
RIFEPNSSDINVFTV\*

### ***Clupea harengus***

#### **>Ch-taar13a**

MDTGISSDQYCFPSVNGSCMKGTYNQGTQVVLYIMFWTSMVITILGNLVVVIISIMHFKQLHTPTN  
LLVMSLALADLLLGLTVMPFSIVRSVDGCWYYGNFCLLHSSFDMFLTSASIFHLISIAIDRHQA  
VCYPLLYPTSITIPVAWLMIAVSWAIAAAYSFGLLYSRANVAGLDDFLKSIYICIGSCNLLFNALW  
GALDTLIAFFLPCTIMVGLYAKIFSVAKGHKIKIEDVNRELNLKNEHVQSSERKAAKTLGIVVGA  
FIFCWMPFFVNSIVDPYTNFSTPAILFEIFTWLGYNSTLNPIIYGLFYPWFRKSLYLIVTLKIF  
SPHSSDINIFPS\*

### ***Dicentrarchus labrax***

#### **>DI-taar13a**

MMTGSLSQEQYCFPGSNASCVMQALRMGTKFALYLLFALGMLVTILGNSVVIVSISHFKQLHNPT  
NMLILSLALVDLLVGVIVMPFSAFRTIHGCWFYGDFAFCLLHSSFDVFFTTLSIFHLICIAVDRQQ  
AICNPLHYSRKITMPVAWFMICVSWTLAAVYSYGLLYSKANIEGLEDYILSINCLGSCFLLFNPL  
WGVLDVICFFFFPCTVMVCLYTKIFIVAKEHVRQIGDMSNFSIDRGKGLIKQSEHKAAKTLGIV  
LGAFIFCWMPFFITSVTDRAFTGFSTPVAIFEAFVWLGYNSTLNPIIYALFYPCFKKCFYCIATL  
KIFSSNSSTMNVSVN\*

#### **>DI-taar13b**

MMTGSLSQELYCFPGSNASCVIAQFGVGTAKTLTLLFAFGMLVTILGNSVVIVSISHFKQLHNPT  
NMFILSLALADLLVGVIVMPFSAFRTIHGCWFYGDFAFCLLHSSFDVFFTTLSIFHLICIAVDRQQ  
AICNPLHYSRKITMPVAWFMICVSWTLAAVYSYGLLYSKANIEGLEDYILSINCLGSCNLLFNPL  
WGVLDSTITAFFFPCTVMVCLYTKIFIVAKEHVRKIGDMNCSNDRGKGLIKQSEHKAAKTLGIV  
LGAFIFCWMPFFINSIIDAFRTGFSTPVAIFEASVWLGYNSTLNPIIYALFYPCFKKCFYLIIVNL  
KIFNPHSSTIKVHVLTHL\*

### ***Esox Lucius***

#### **>EI-taar13a**

MSHTCSCDYVAKISSNFECVLFMAMDVPPQPLDPKLFYCYPETNASCTREILNEGAQIALYLLFVL  
GILVTILGNGVVIISIAHIKQLHTPTNMLIMSLALADLLIGVTVMPPFSSIRAVEGCWYFGEVFC  
LHSSFDVFFTTLSVSIHFLVFIADRYLAVCNPLRYTTNITLPTAWLMVLGSWCLALYSYGLLYSK  
AHVRGQDESIASVYCLGSCDLFFNALWGALDTLIAFFFFPCSVMVGLYTKIFFVAKEHVRKIEDRQ  
KKLVGGGVVSKRSERKAAKTLGIVGVFIFCWLPFFVNSIVDPYTNFSHNDFTPDTVFEMFLWL  
YFNSTVNPIIYALFYPCFKKCLNVIVTLKIFNKNSSYINVFAAT\*

### ***Gasterosteus aculeatus***

#### **>Ga-taar13a**

MSLGLSQEQYCFSGSNSSCFRAQFSVETKVTLQLI FSLGMLITILGNSVVIVSIGHFKQLHNPTN  
VLIVSLAYADLLVGVTVMPFSAIRTIHGCWFYGEDLCLLHSSFDVFFTTLSVSIHFLICIAIDRQQA

ICNPLHYSRNITISVAWIMVCASWALAAIYSHGLIYSKANVAGIE!  
LLDNIFCFFFPFCILMVCLYTKVFIWAKEHVRKIEDMSKSSMNKESGGLIKQSEHKA AKT LGIVLG  
GFIFCWMPFFLNSIIDAYTGFSTSAFVFEALVWLG YFNSTLNPIIYALFYPCFKKCFCLIVNLKI  
FNSQSSTIKVHILTHV\*

### ***Gadus morhua***

#### **>Gm-taar13a**

MLIMTDIINQVEQQLCYPGSNTSCPRAEFHLGAQVALYTLFVLGMLVTVVGNNAVVIIVSIAHFKQL  
HSPTNVLVLSLALADLLLGVTVMPFSTVRAVQGCWFYGDTFCLLHSAFDMFLTSVSI FHLICIAV  
DRHEAVCKPLHYSRNITMTVAWLMVMSASWALAAALYSYCLMYSKANIRGLEDYLASIYCLGSCNLL  
FNKLWGTLDTIIAFFFFPCTIMVGLYAKIFLVAREHARKIDDMGGHGGTLNGKGAGGQTKRSEHKA  
AKT LGIVVGAFIFCWMPFFLNSIADAYTGFSTPEAVFEVFWLGYFNSTLNPIIYALNYPWFRKT  
SRLIFTLKIIFTSGSSSMNVTVN\*

#### **>Gm-taar13b**

MRVCVYLCMLIMIDRIYQIEQQLCYPGSNTSCPRAEFHLGAQVALYTLFVLGMLATVVGNAVVIIV  
SIAHFQQLHSPTNVLVLSLALADLLLGVTVMPLSTVRAVQGCWFYGDTFCLLHSAFDMFLTSVSI  
FHLICIAVDRHEAVCKPLHYSRNITMTVAWLMVMSASWALAAALYSYCLMYSKANIRGLEDYLASY  
CLGSCNMLFNKLWGTLDTIIAFFFFPCTVMVGLYAKIFLVAREHARKIDDMGGHGGTLNGKGAGGQ  
TKRSEHKA AKT LGIVVAFIFCWMPFFLNSIADAYTGFSTPAAVFEVFSWLSYFN SILNPVIYSL  
NYPWFRKTSRLIFTLKIIFTSDSSSINVTVN\*

#### **>Gm-taar13c**

MLCEAYTRCCAQIPCRAGISDCVCLCMLIMTDIINQVEQQLCYPGSNTSCPRAD FHLGAQVALYT  
LFVLGMLVTVVGNNAVVIIVSIAHFKQLHSPTNVLVLSLALADLLLGLTVMPFSTLRAVQGCWFYGD  
TFCLLHSAFDMLLTCNSIFHLICIAVDRHEAVCKPLHYSRNITMTVAWLMVMSASWALATLYSYCL  
IYSKANIRGLEDYLASIYCLGSCNLLFNKLWGTLDTIIAFFFFPCTIMVGLYAKIFLVAREHARKI  
DDMGGHGGTLNGKGASGQTKRSEHKA AKT LGIVVGAFIFCWMPFFLNSIADAYTGFSTPAAVFEV  
FVWLG YFNSTLNPAIYALNYPWFRKTSRLIFT\*

### ***Ictalurus punctatus***

#### **>Ip-taar13a**

MPEVLNPSLLEG AHLEEYCFPDSNV SCLKASYHMAAQTAIYFLLLLATTITILGNSVVIISIAHF  
KQLHTPTNILVMSLGLADLIVGVIVMPFSMIRSV DGCWYFGEEFCLWHSSFDVFLTTASVFHLVC  
IAVDRIEAVSYPLQYPTRVTMPVAWFMVTVSWTAAALYSFGLLLSKANVENLDEYIASTYCLGYC  
NILFNELWSVLDTCVCFLLPCSVMICLYAKIFLISKKHARKVDCARQGKNDVTKFSQKV KHENKA  
AKT LGIVVGAFNLCWMPFYINSILDPYINFSTPLVLFDFVWLG YINSTLNPIIYGLFYPWFRKT  
LYLMVTLKIFAPDSSDIKVYAA\*

#### **>Ip-taar13b**

MPEALNSSLPEEVDLKYCFPDSNVSCVKASYNIASKTVLYFILVFAMTITILGNSVVIISIAHF  
KQLHTPTNILVMSLALVDLLLGLTVMPFSMIRSV DGCWYFGEEFCFIHSSFDMCLTTASIFHLIS  
IATDRIEAVCHPLQYPSRVTIIPVAWLMVALSWTAAAVYSYGLLCSKANVEKLDEYIASISCLGYC

GLLFNALWAALDACICFFFLPCSVMFCLYAQIFFFISKKHARKIEGVKPGRNDMNLTKFSQRVKHEN  
KAAKTLGIVVGAFICCWMPFFVTSLLDPYINFATPLIIFDVFVWLGYNINSALNPIIYGLFYPWFR  
KTLHLIVTLKIFAPHSSDIKVYAA\*

### >Ip-taar13c

MPEALNSSLLEEVDLKYCFPDSNVSCVKASYNVASKTVLYFILVFAMTITILGNSVVIISIAHF  
KQLHTPTNILVMSLALVDLLLGLTVMPPFSMIRSVGDCWYYGEEFCFLHSSFDMCLTGASIFHLIS  
IAIDRYQAVSYPLQYPSRVTPVAVFMAVTSWTASVVYSYLLCSKANVEKLDEYIASISCLGYC  
GLLFNALWAALDACICFFFLPCSVMFCLYAQIFFFISKKHARKIEGVKPGRNDMNLTKFSQRVKHEN  
KAAKTLGIVVGAFICCWMPFFVTSLLDPFINFATPLVLYDVFVWLGYNINSTLNPIIYGLFYPWFR  
KTLHLIVTLKIFCSHSSDMKLYAS\*

### >Ip-taar13d

MPDAPNSSLLEEAAHLEEYCYPDSNVSCLKMSYHMTTKTVLYFILVFAMTITIIIGNFFVVIISIAHF  
KQLQTPPTNILVMSLALVDLLLGITVMPPFSMIRSVGDCWYYSKEFCFLHSSFDMCLTGASIFHLIS  
IAIDRYQAVCYPLQYPTRVTKPVAWFMVAVSWTVAVVYSYLLLTASVDNGFADCLGSCSLFLN  
ELWAILSIVTGFILPCCVMIGLYAKIFFFISKKHARKIEGVKQGRDMLTKFSQRVKHENKAAKT  
LGIVVGAFNFCWMPFFLTSLDDPFINFATPLLLYDVFVWLGYNINSTLNPIIYGFFYPWFRKTLV  
IVTLKIFAPHSSDMKVYTS\*

### >Ip-taar13e

MPGSLSYLQEEADFKVYCFPDYNASCLKNPHNVATQTVLYFILVFAMTITIIIGNSFVVIISIAHF  
KQLQTPPTNILVMSLALVDLLLGITVMPPFSMIRSVGDCWYYSKEFCFLHSSFDMCLTGASIFHLISI  
AIDRYQAVCYPLQYPTRVTKPVAWFMVAVSWTVAVVYSYLLLTASVDNEFADCLGSCSLFMNA  
LWAILSIVTGFLLPCSAMIGLYAKIFFFISNKHARKIEGVKQGRDMLTKFSQRVKHENKAVKTL  
GIVVGAFNFCWLPYFLTSLDDPFINFATPILLYDVFVWLGYNINSTLNPIIYGFFYPWFRKTLVLI  
VTLKIFAPHSSDMKVYTS\*

### >Ip-taar13f

MLDAPNSSLLEAADLREYCYPESNVSCVKISQNVVARTVLYSLLVFATVITILGNSMVIISIAHF  
KQLHTPTNILVMSLALVDLLLGLTVMPPFSMVRSDGDCWYFSEEFCEWHSSFDLFTGASIFHLIF  
IAVDRYQAVCHPLQYPTRVTKRVAWLMAALSWTIAAGYSYLLLTAKANVENLDDYAASINCLGSC  
IFLINALCAVLSTFIGLILPCSFMICLYAQIYLISTRHAIKIGATKQSRHNRTIKVSQRVKHENK  
AAKTLGIVVSAFHFCWMPYFITSVVDPFNFNFTTTPPSLYEVFVWLGYNINSTLNPIIYGLFYPWFR  
ALYLILTLKIFARNSSDIKVYAT\*

### >Ip-taar13g

MVEAQNSAVLEVEDFIEYCYPESNVSCVKMSHNVVAKTVLYSILVFAMAITIVGNFVVIISIAHF  
KQLHTPTNILVMSLALVDLLLGITVMPPFSMVRTVDGDCWYFGKEFCYWHSTFDLFTGASIFHLIS  
IATDRYQAVCYPLQYPTRITLPVAGFMAALSWILATVYAFSTVGSKANLANLQDYIASIECFGNC  
FFLVNAICASISTSLFFILPVCIMIGLYAQIFLVSEKHARKMEGTKQNRDMDTSNKIFQVKVHEK  
KAAKTLGIVVGAFNLCWMPYFITSVVDPLYNFTTTPAIVYELFVWLGYNINSTFNPIIYGLFYPWFR  
KTLVLIIVTLKIFAPNSSDIKVYAA\*

### >Ip-taar13h

MEAQNSAVLEVEDFIEYCYPEENVSCVMSHNVAKTVLYSILVFVLAITIVGNFVVIISIAHFK  
QLHTPTNILVMSLALVDLLLGVTIMPFSMVRTVDGCWYFGKEFCYWHSTFDFLEFTGASIFHLISI  
ATDRYQAVCYPLQYPTRIITLPVAGFMAALSWILATVYAFSTVGSKANEANLQDHIASIDCFGKCF  
LLVNAVCAASICASLFFILPVCIMIGLYAQIFLVSEKHARKMEGTKQNRTDMTSENKIFQKVKHEKK  
AAKTLGIVVGAFNLCWMPYFITSVVDPLYNFTTPAIVYELFVWLGYINSTFNPIIYGLFYPWFRK  
TLYLIVTLKIFAPNSSDVKYAA\*

### ***Lates calcarifer***

#### >Lac-taar13a

MTGGLSPEQYCFPDSNASCVMAQFSVGTQKVALYLLFALGMLVTILGNSVVIVSIAHFTQLQNPTN  
VLVLSLALADLLVGVVMPFSAIRTVHGCWYFGDAFCLLHSSFDMFLTSVSI FHLICIAVDRHQA  
ICNPLHYSRKITISVACFMVCVSWALAALYSYGLLYSKANIAGLEDYIASIYCLGSCNLLFNQLW  
GVLDSITAFFFPCTVMVCLYTQIFIVAKEHVRKIGDMNNSNDRGRGGLIKQSEHKAAKTLGIVL  
GAFIFCWMPFFITSITDAYTGFIPTAAIFEAFVWLGYFNSTLNPVIYAFFYPWFKKCFYLIVSLK  
IFNPNSSTIKVNIRTHS\*

#### >Lac-taar13b

MTGGLSPEQYCFPDSNASCVMAQFSVGTQKVALYLLFALGMLVTILGNSVVIVSIAHFTQLQNPTN  
VLVLSLALVDLLVGVVMPFSAIRTVHGCWYFGDAFCLLHSSFDVFFTTLSI FHLICIAVDRHQA  
ICNPLHYSRKISISVACFMVCVSWALAALYSYGLLYSKANIAGLEDYIASIYCLGSCNLLFNQLW  
GVLDSIICFFFPCIVMVCLYTQIFIVAKEHVRKIGDMNNSNDRGRGGLIKQSEHKAAKTLGIVL  
GAFIFCWMPFFITSITDAYTGFIPTAAIFEAFVWLGYFNSTLNPVIYALFYPCFKNCFYCIIVTLK  
IFSSNSSNMHISLK\*

### ***Labrus bergylta***

#### >Lb-taar13a

MMVVGFSQEQFCFPESNASCVLTQFSVGTKFILYLLFSLGMLITILGNTVVIVSISHFKQLHNST  
NVLILSLALVDLLVGVIVMPFSAIRTVHGCWYFGEVFCQLHSSFDMFLTSVSI FHLICIAIDRHE  
AICDPLHYSMKITMPVAVIMVCCSWALAAYVSFGLLYSKANVAGLEDYIESIYCLGSCNLLFNHL  
WGILDSIIAFFFPICIVMVCLYTKIFIVARDHVRKIGDMKSSSNERGKIGFIKQSEHKAAKTLGIV  
LGSFIFCWMPFFLNSIADAYTGFTPVAVFEAFVWLGYFNSTLNPVIYALFYPCFKKCFYLIINL  
KIFSPNSSSIKVHTLTQL\*

#### >Lb-taar13b

MMVVGFSQEQFCFPESNASCVLTQFSVGTKFILYLLFSLGMLITILGNTVVIVSISHFKQLHNST  
SVLILSLALVDLLVGVIVMPFSAIGTVHGCWYFGEVFCQLHSSFDMFLTSVSI FHLICIAIDRHE  
AICDPLHYSMKITMPVAVIMVCCSWALAAYVSFGLLYSKANVAGLEDYIESINCLGSCNLLFNHL  
WEILDSIIVFFFPCIVMVCLYTQIFIVAKEHLQKIGDVKHSSKDRGRIWVIKQSEHKAAKTLGIV  
LLLLDAIFL!  
NSVGDAYNGFSTPVAVFETFWWLGYFNSTLNPVIYALFYPCFKKCFYRIITLKIFSPNSSTMNVS  
LK\*

### >Lb-taar13c

MMTGGLSEEHYCFPGFNVSCVRTQFSVGTGFALFMLFALSMGLTILGNTVVIVSISHFKQLHNPT  
NVLILSLALVDLLVGVIVMPFSAIRTVHGCWFYGEVFCQLHSSFDMFLTTLISIFHLICIAVDRQQ  
AICDPLHYSMKITMPVAWIMVCCSWALAAVFSFGLLYSKANVAGLEDYIESINCLGSCYLLFNHL  
WGILDSIIVFFFFPCIVMVCLYTQIFIVAKEHLQKIGDVKHSSKDRGRIWVIKQSEHKAAKTLGIV  
LGAFIFCWMPFFLNSVGDAYNGFSTPVAVFETFVWLGYFNSTLNPIIYALFYPCFKKCFYCIITL  
KIFSPNSSTMNVS LK\*

### >Lb-taar13d

MMTGGLSEEHYCFPGFNVSCVRTQFSVGTGFALFMLFALSMGITILGNTVVIVSISHFKQLHNPT  
NVLILSLALVDLLVGVIVMPFSAIRTVHGCWFYGEVFCQLHSSFDMFLTTLISIFHLICIAVDRHE  
AICDPMHYSMKITMPVAWIMVCCSWALAAVYCFGLLYSKASVAGLEDYIESIYCLGSCYLLFNHL  
WGILDSILSFFFCTVMIFLYTKIFIVAKAHAQKIGDVKKGTNEKGRAGLLKQSEHKAAKTLSIV  
LGAFIFCWMPFFTISLFEMILGFSTPVAVFEEAFVWLGYFNSTLNPIIYALFYPCFKKCFYCIITL  
KIFSPSSSTMNVAFK\*

## ***Larimichthys crocea***

### >Lc-taar13a

MMTGGLSQEQYCFPGYNASCVRTQFSVGTGFALSLLFTIGMLITILGNSVVIVSIRHFKQLHNPT  
NLLILSLALADFLVGVIVMPFSADRTINGCWFYGEAFCLLHSSFDMFLT SVSIFHLICIAVDRQQ  
AICNPLHYRKITMSVAWIMVCGSWALAAIYSYGLLYSKANIVGLEDYILSINCLGSCNLLFNPL  
WGILDSITAFFFPCTVMVCLYAKIFITAREHVRKIETSNDRERGGLIKQSEHKAAKTLGIVLGAF  
ILCWMPFFINSIIDAFITGFSTPAAVFEAFVWLGYFNSTLNPIIYAFFYPWFKKCFYLIVNLKIFQ  
PNSSTINHVHLTQV\*

### >Lc-taar13b

MMTGGLSQEQYCFPGYNASCVRTQFSVGTGFALSLLFTIGMLITILGNSVVIVSIRHFKQLHNPT  
NLLILSLALADFLVGVIVMPFSADRTINGCWFYGEAFCLLHSSFDMFLT SVSIFHLICIAVDRQQ  
AICNPLHYRKITMSVAWIMICGSWALAAALFSYGLLYSKANIVGLEDYILSINCLGSCNLLFNPL  
WGILDSITAFFFPCTVMVCLYAKIFITAREHVRKIETSNDRERGGLIKQSEHKAAKTLGIVLGAY  
IVCWMPFFINSIIDAFITGFITPAAIFESFVWLGYFNSTLNPIIYAFFYPWFKKCFYLIVNLKIFQ  
PKSSTIKVHVLTHS\*

### >Lc-taar13c

MFWHIFRLMMTAGLSQEQYCFPGYNASCVRTQFSVGIKFALSLLFALGILVTILGNSVVIVSICH  
FKQLHNPTNLLILSLALADFLVGVIVMPFSADRTINGCWFYGEAFCLLHSCLDMSLTTVSI FHLI  
CIAVDRQQAICNPLHYRKITMSVAWIMICGSWALAAALFSYGLLYSKANIVGLEDYILSINCLGS  
CYLLFNPLWGIVDSITCFFFPCITVMVCLYAKIFITAREHVRKIGDMNCSNDRERGGLIKQSEHKA  
AKTLGIVLGAYIVCWMPFFINSIIDAFITGFITPAAIFESFVWLGYFNSTLNPIIYAFFYPWFKK  
FYLIVNLKIFQPKSSTIKVHVLTHS\*

***Lepisosteus oculatus***

>Lo-taar13a

MDVSMLELRKENFCYPTINGSCTREVRSLTTYILLYILLSTGMIITIFGNLVVMISITYFKQLH  
TPTNMLVLSLALADFLGLGMSVMPFSMIRSVETCWYYGDMFCQLHSSFDMFLTTVSI FHLIFIALD  
RYQAVCNPLHYYSKITNRVAWLMIGVSWGVAAYTYGLLYSRGNAGLNEYVSSSTYCLGSCVLFY  
NALWGSLDTLIAFFLPCCIMVGLYTKIFFIARKHVQIGTKTDQEKKDRFSEKSEWKAAKTLGIV  
VGVFILCWMPFFVNSIIDPFTNFSTPAILFELFVWLGYNSTLNPIIYAFFYPWFQKSLKLI VTF  
RIFTKHSSSTKLFSEQI\*

>Lo-taar5-like

MKSTDLEINLLEYCFENMTLSCIKVVRSPAIVILYCVFLLTVLITIFGNLVVVISISHFRQLHL  
PSNLLILSLATADFLGLFVLPFSMIRTVESCWYMGSFCKLHTSIDLLCLASVFHVFFIAFYR  
YYAVCHPLHYTSKMTTQVTRFIVVGWVFPTICIAFISFHYQDKETENTGSKVGCEGSCILLFN  
EIFNFMSLTFYVACLITLLMYARIFTIARKQANHISMEARTTYLEHNKIHFKGGNDRKAVKTLG  
IVVGCFLFCWLPFITDKTVDPYVNFDTPAVVYDSFIWLAYFNSTFNPFIYAFFFPWFRKALKIIA  
TCKIFRPNSSRIQIYTE\*

***Leuciscus waleckii***

>Lw-taar13a

MDLSSQEYDPTLFCFPAVNNCLKGTHLVSTQTVFYLLILVSAMTVTILGNSVVIISIAHFKQLQT  
PTNILVMSLALADLLLGLVMPFSMIRSVNGCWYYGDTFCLLHSSFDLFLTSVSI FHLIFIAIDR  
HQAVCYPLQYPTRITIPVAWVMVMI SWSMAALYSYGLVYSKANVEGLEEFIESIYCMGSC TLLFN  
ALWSVLDTLTFFLPCSV MVGLYARIFVIARKHIRKIGDANQHENESTFKSSRRSERKAAKTLGV  
VVGAFILCWLPFFINSIMDPYINFSTPVALFEAFVWLGYNSTINPIIYGLFY PWF!  
KTLSLIITMRIFEPNSSDITVFTV\*

>Lw-taar13b

MDLSSQEYDPTLFCFPAVNNSCVKGTHLVSTQTVLYLLILVSAMTVTILGNSVVIISIAHFKQLQT  
PTNILVMSLALADLLLGLVMPFSMIRSVNGCWYYGDTFCLLHSSFDLFLTSVSI FHLIFIAIDR  
HQAVCYPLQYPTRITIPVAWVMVMI SWSMAALYSYGLVYSKANVEGLEEFIASIYCMGSC SLLFN  
ALWGALDTLIGFFLPCSV MVGLYARIFVIAKKHARKLDDANQHEKENVFKSSRRSERKAAKTLGV  
VVGAFIICWLRFL!  
SMLDPYINFSTPVSLFEVFWLGYINSTIKPIIYGLFY PWFRTLSLILTMRI FEPNSSDINVT  
V\*

***Morone saxatilis***

>Ms-taar13a

MMTGDFSQDLYCFPGSNASCVIAQFGVGTKFALYLLFALGMLVTILGNSVIVSISHFKQLHNPTN  
MLILSLALVDLLVGVIVMPFSAFWTIHGCWFYGDFAFCLLHSSFDVFLTTLSIFHLICIAVDROQA  
ICNPLHYSRKITMPVAWFMICVSWTLAAVYSYGLFSKANI FNPLWGVLD SVICFFFPCTVMVCLY  
TKIFIVVKEVKELKRHL

## ***Pimephales promelas***

### **>Pp-taar13a**

MDLSSQEYDLTEFCFPAVNNCLKGTSLVSTQTVLYLILVLAAMTVTILGNSVVIISIAHFKQLQT  
PTNILVMSLALADLLLGLVVMPPFSMIRSDGDCWYYGDAFCLLHSTFDLFLTSVSI FHLIFIAIDR  
HQAVCYPLQYPRRITMSVAWVMVLI SWSMAALYSYGLLYSKANVEGMEEFIAS TYCLGSCTLFFN  
ALWSVLDTLLTFFLP CSVMVGLYARIFVIARKHIRTIGDAKQHENETTFKSSRRSERKAAKTLGV  
VVGAFIVCWLPFFINSMMDPYINFSTPVALFEAFVWLG YINSTINPIIYGLFYPWFRKTL SLIIT  
MKIFEPNSSDITVFTV\*

### **>Pp-taar13b**

MDLSSQEYDLTEFCFPAVNNCLKGTSLVSTQTVLYLILVLAAMTVTILGNSVVIISIAHFKQLQT  
PTNILVMSLALADLLLGLVVMPPFSMIRSDGDCWYYGDAFCLLHSTFDLFLTSVSI FHLIFIAIDR  
HQAVCYPLQYPRRITISVAWVMVLI SWSMAALYSYGLVYSKANVEGLEEFIASTYCLGSCTLFFN  
ALWGALDTLIGFFLP CSVMVGLYARIFVIAKKHARKVDNANQHEKENVFKSSRRSERKAAKTLGV  
VVGAFIICWLPFFINSMIDPYINFSTPVALFEVFWLGYINSTINPIIYGLFYPWFRKTL SLIIT  
MKIFEPNSCDINVTFTV\*

## ***Pygocentrus nattereri***

### **>Pyn-taar13a**

MLQATNSSFLVEADLKEYCYPESNVSCVRSFY SVAARSVLYVLLVLAMSVTILGNSVVIISIAHF  
KQLHTPTNMLVMSLALADLLLGVIVMPPFSMIRSDGDCWYFGEAFCLLHSSFDMLLTASIFHLMC  
VATDRYQAVCHPLQYPTTRITIP TAWLMVAVSWITAAGYSYGLMYSKANVEKLDEYIESISCMGSC  
NLVFNALWGALDTLIGFLLPCTVMFCLYAQIFLVSKRHARKIEGTKQSRNETSLNKVSQSMKREN  
KAAKTLGIVVGAFIFCWIPFFINSLIDPYINFSTPVVLFVFWLGYINSTLNPIIYGLFYPWFR  
KCLNLIVTLRIFAPHSSDTNVFAA\*

### **>Pyn-taar13b**

MLQATNSSFLVEADLKEYCYPESNVSCVRSFY SVAQAQSVLYVLLVLAMSVTILGNSVVIISIAHF  
KQLHTPTNMLVMSLALADLLLGVIVMPPFSMIRSDGDCWYFGEAFCLLHSSFDMLLTASIFHLIC  
ISVDRYQAVCHPLQYPTTRITIP TAWLMVAVSWITAAGYSYGLMYSKANVENLDEYIESISCMGSC  
NILFNALWGALDALLCFLPCTVMFCLYAQIFLVSKRHARKIEGTKQSKTETSLNNISQSMKREN  
KAAKTLGIVVGTTFIFCWIPFFINSIIDPYINFSTPVVLFVFWLSYINSTLNPIIYGRFSPWFR  
KCLYLIVTLRIFAPHSSDTNVFAA\*

### **>Pyn-taar13c**

MLQATNSSFLVEADLKEYCYPESNVSCVRSFY SVAQAQSVLYVLLVLAMSVTILGNSVVIISIAHF  
KQLHTPTNMLVMSLALADLLLGVIVMPPFSMIRSDGDCWYFGEAFCLLHSSFDIFLTSASTFHLMC  
VAIDRYQAVCHPLQYPTTRITIP TAWVMVAVSWITAAGYSYGLMYSKANVVNLDEYIESISCMGSC  
NLVFNALWGALDALLCFLSPCTVMFCLYAQIFLVSKRHARKIEGTKQSRNETSLNKVSQSMKREN  
KAAKTLGIVVGTTFIFCWMPFYVNSLMEPHINFSTPVELFEVFWLGYINSTLNPLIYGLFYPWFR  
KCLYLIVTLRIFAPHSSDTNVFAA\*



### >Pyn-taar13d

MLQATNSSFLVEADLKEYCYPESNMSCVRSFYSVVARSVLYVLLVLAMSVTILGNSVVIISIAHF  
KQLHTPTNMLVMSLALADLLLGLVMPFMSMIRSVGDCWYFGAEFCLLHSSIDIFLTSASTFHLMC  
VATDRYQAVCHPLQYPTRITIPVAVVMVAVSWITAAGYSYGLMYSKANVNLDEYIESISCMGSC  
NLVFNALWGPLDVLLCFLSPCTVMFCLYAQIFLVSKRHARKIEGTKQSRNELSLNKVSQSMKREN  
KAAKTLGIVVGTFFFCWMPYYINSLTNPYINFSTPVELFEVFWLGYINSTLNPIIYGLFYPWFR  
KCLYLIVTLRIFAPHSSDTNVFAA\*

### ***Sinocyclocheilus anshuiensis***

#### >Sa-taar13a

MDLSSQEYDPTQFCFPAVNNSCLKGTHHVSTQTVVYLLLVLAMTVTILGNLVVVIISIAHFKQLQT  
PTNILVMSLALADLLLGLVMPFMSMIRSVGGCWYGGDAFCLLHSTFDLFLTSVSIHFLIFIAIDR  
HQAVCYPLQYPARITIPVAVVMVMI SWCMAALYSYGLVYSKANVEGLEEYIESIYCMGSC TLLFN  
ALWGAIDTLIAFLLPCSVMGLYARIFVIAKQHARKLCETNQHEKENMFKSSRRSERKAAKTLGV  
VVGAFIICWLPFFINSLIDPYINFSTPIALFEVFWLGYINSTINPIIYGLFYPWFRKTLSLIIT  
RRIFEPNSSDINVFTV\*

#### >Sa-taar13b

KFCSLLYPTRITIPVAVVMVMI SWSMAALYSYGLVYSKANVEGLEEYIESIYCMGSC TLLFNALW  
SV\*THYLTFLLPCSVMIGLYARIFVVAKKHIRTIGEANQQENVSTFKSSRRSERKAAKTLGVVVG  
AFIICWLPFFINSMDPYINFSTPFVLF EAFVWLG YINSTINPIIYDLFYPWFRKTF LSL

#### >Sa-taar13c

MDLSQEYDLTQFCFPAVNNSCLRGTHHVSTQTVVYLLLVSAMTVTILGNSVVIISIAHFKQLQTP  
TNILVMSLALADLLLGLVMPFMSMIRSVGDCWYGGDAFCLLHSSFDLFLTSVSIHFLIFIAIDR  
QAVCYPLQYPTRITIPVAVVMVMI SWSIAALYSYGLVYSKANVEGLEEYSDSMYCMGSC TLLFNA  
LWSVLDTLTFFLPCSVMIGLYARIFVVAKKHIRTIGEANQYENENMFKTSRRSERKAAKTLGVV  
VGAFIICWLPFFINSLMDPYINFSTPFVLFDTFGWLG YINSTINPIIYGLFYPWFRKSLSLIVTM  
RIFEPNSSDISVFTV\*

#### >Sa-taar13d

MDLSSQEYDPTQFCFPAVNNSCLKGTHHVSTQTVVYLLLVLAMTVTILGNLVVVIISIAHFKQLQT  
PTNILVMSLALADLLLGLVMPFMSMIRSVIGCWYGGDAFCLLHSTFDLFLTSVSIHFLIFIAIDR  
HQAVCYPLQYPTRITIPVAVVMVMI SWALIAVYSYGLLYSEANVEGLEEYIESIYICIGRCSLLFS  
KLWSVLDTLITFFFPCSVMIGLYVRI FVVAKKHVRI ISEANQHEIQNVFKSSRRSERKAAKTLGV  
VVGAFIICWLPFFINSMVDPYINFSTPLALFEVFWLGYINSTINPIIYGFFYPWFRKTLSLIIT  
RRIFEPNSSDINVFTV\*

#### >Sa-taar13e

MDLSSQEYDPTQFCFPAVNNSCLKGTHHVSTQTVVYLLLVLAMTVTILGNLVVVIISIAHFKQLQT  
PTNILVMSLALADLLLGLVMPFMSMIRSVGGCWYFGDAFCLLHSSFDLFLTSVSIHFLIFIAIDR  
HQAVCYPLLYPTKITIPVAVVMVMI SWCMAALYSYGLVYSKANVEGLEEYIESIYCMGSC TLLFN  
ALWSVLDTLTFFLPCSVMIGLYARIFVVAKKHIRTIGEANHHENESTFKSSRRSERKAAKTLGV

VVGAFIICWLPFFINSLIDPYINFSTPFALFEAFVWLGYINSTINPIIYGLFYPWFRKTLSLIIT  
LKIFEPNSSDISVFTV\*

### ***Sebastes aleutianus***

#### >Sea-taar13a

MDLSLFGFFWVISEVLAYVFELMMSFDLSQEQYCFPGSNTSCVRAHFSVGTKVALYLLFALGMLV  
TILGNSVVIVSIGHFKQLHNPTNVLIVSLALVDLLVGVTVMPFSTIRTIDGCWFYGDDEFLLHSS  
FDVFFTTLSIFHLICIAVDRQQAICNPLHYSRNITMSVAWIMVCASWALAAVYSYGLLYSKANVA  
GLEDYMASIDCLGSCYLLFNPLWGXLDSIVCFFFPCTVMVCLYTKIFIVAKEHVRKIGDMHNRSN  
DRVGGGLIKQSEHKAAKTLGIVLGAYIFCWMPFFINSIIDVYIGFSTPVAIFEAFVWLGYFNSTL  
NPIIYAFFYPCFKKCLYCIIVTLKAFPSNP\*

#### >Sea-taar13b

MSLDLSQEYCFPGSNASCVRAHFSIGTKVALYLLFTLGMLVTILGNSVVIVSIGHFKQLHNPTN  
VLIVSLALADLLVGLTVVPPFSTIRTIHGCWFYGDDEFMLHSCFDMFLTTVSIIFHLICIAVDRQQA  
ICNPLHYSSNITMSVAWIMVCASWALAAVYSYGLLYSKANVAGLEDYIASIDCLGSCNIFNSLW  
GILDSIASFFFPCTVMVCL

#### >Sea-taar13c

MTFGLSEEXYCFPGSNALCVREQFSVGAKVALYLLFT!  
RMLVTILGNSVVIVSIGHFKQLHNPTNVLIVSLALVDLLVGVTVMPFSTIRTIHGCWFYGDDEFM  
LHSSFDMFLTTVSIIFHLICIAVDRQQAICNPL!  
YSSNITMSVAWIMVCASWALAAVYTYGLLYSKANVAGLEDYMASIDCLGSCNLLFNLSLWGILDS

### ***Sebastes minor***

#### >Sem-taar13a

ILGNSVVIVSIGHFKQLHNPTNVLIVSLALVDLLVGVTVMPFSTIRTIHGCWFYGDDEFLLHSSF  
DVFFTTLSIFHLICIAVDRQQAICNPLHYSRNITISVAWIMVCASWALAAVYSYGLLYSKANVAG  
LEDYMASIDCLGSCYLLFNPLWGLVDSIVCFFFPCTVMVCLYTKIFIVAKEHVRKIGDMHNxxxK  
QSEHKAAKTLGIVLGAYIFCWMPFFINSIIDVYIGFSTPVAIFEAXXXLGYFNSTLNPIIYAFFY  
PCFKKCLYCIIVTLKAFPSNP\*

#### >Sem-taar13b

VTILGNSVVIVSIGHFKQLHNPTNVLILSLALADLLVGLTVVPPFSTIRTIHGCWFYGDDEFMLHS  
SFDMLTTVSIIFHLICIAVDRQQAICNPLHYSSxxxSVAWIMVCASWALAAVYSYGLLYS

### ***Sebastes nigrocinctus***

#### >Sn-taar13a

MDLSLFGFCWVICEVLVYLFELMMSFDLSQEYCFPGSNASCVRAHFSVGTKVALYLLFTLGMLV  
TILGNSVVIVSIGHFKQLHNPTNVLIVSLALVDLLVGVTVMPFSTIRTIHGCWFYGDDEFLLHSS  
FDVFFTTLSIFHLICIAVDRQQAICNPLHYSRNITMSVAWIMVCASWALAAVYSYGLLYSKANVA  
GLEDYMASIDCLGSCYLLFNPLWGLVDSIVCFFFPCTVMVCLYTKIFIVAKEHVRKIGDMHNRSN

VREGGGLIKQSEHKAAKTLGIVLGAYIFCWMPFFINSIIDVYIGFSTPVAIFEAFVWLG YFNSTL  
NPIIYAFFYPCFKKCLYCIVTLKAYPSNP\*

### ***Sebastes rubrivinctus***

#### >Ser-taar13a

MDLSLFGFCWVICEVLVYLFELMMSFDLSQEQYCFPGSNASCVRAHFSVGAKVALYLLFTLGMLV  
TILGNSVVIVSIGHFKQLHNPTNVLIVSLALVDLLVGVTVMPPFSTIRTIHGCWFYGDDEFLLHSS  
FDVFFTTLSIFHLICIAVDRQQAICNPLHYSRNITMSVAWIMVCASWALAAVYSYGLLYSKANVA  
GLEDYMASIDCLGSCYLLFNPLWGLVDSIVCFFFPCCTVMVCLYTKIFIVAKEHVRKIGDMHNRSN  
VREGGGLIKQSEHKAAKTLGIVLGAFIFCWMPFFINSIIDVYIGFSTPVAIFEAFVWLG YFNSTL  
NPIIYAFFYPCFKKCLYCIVTLKAYPSNP\*

#### >Ser-taar13b

MMSFVLSQEQYCFPGSNASCVREQFSVGTKVALYLLFTLGMLVTILGNSVVIVSIGHFKQLHNPT  
NVLILSLALSDDL VGVTVMPPFSTIRTIHGCWFYGTKVALYLLFTLGMLVTILGNSVVIVSIGHFK  
QLHNPTNVLILSLALSDDL VGVTVMPPFSTIRTIHGCWFYSDDFLLHSSFDMFLTSVSI FHLICI  
AVDRQQAICNPLHYSRNITMSVAWIMVCASWALAAVYSYGLLYSKANVAGLEDYIASIDCLGSCN  
LLENLWGLD SITAFFFPCTVMVCLYTKIFFVAKEHVRKIGX

### ***Sebastes steindachneri***

#### >Ses-taar13a

NPTNVLIVSLALVDLLVGVTVMPPFSTIRTIHGCWFYGDDEFMLHSSFDVFFTTLSIFHLICIAVD  
RQQAICNPLHYSRNITMSVAWxxxKANVAGLEDYIASIDCLGSCYLLFNPLWGLVDSIVCFFFPC  
TVMVCLYTKIFIVAKEHVRKIGDMHNRSNDRVGGGLIKQSEHKAxxxIFCWMPFFINSIIDVYIG  
FSTPVAIFEAFVWLG YF

### ***Scleropages formosus***

#### >Sf-taar13a

MNISREPDAEQYCYPASNRTCTKYIHSAAAYAALYAFFALGSAVTVTGNLVVLVLSIAHFRQLHTP  
ANMLIMSLAMADLLVGILVMPFSAIRTEGWCWFGEAFCLLHSTFDLFLTSVSI FHLISIAIDRY  
QAVCNPLRYPTTITIPVWLMIFLSWGAAAAYSYSLLYTKANVAGLEEYIALINCLGSCNLLFNA  
LWGALDSL VGFFLPCSVMMGLYAKIFLVARQHVRRLGDN SHQAHMNTENTIRKNHSSERKAARTL  
GIVLGVFFLCWMPFFINSVIDPYINFGTPSIVFELLVWLAYFNSTLNPIIYALFY PWFQSLKFI  
VTMKIIFTPHSSDFNVFPER\*

#### >Sf-taar13b

MNISREPDAEQYCYPAPNRTCTKYIHSAAAYAALYAFFALGSAVTVTGNLVVLVLSIAHFRQLHT  
PANMLIMSLAMADLLVGILVMPFSAIRTEGWCWFGEAFCLLHSTFDLFLTSVSI FHLISIAIDR  
YQAVCNPLRYPTTITIPKAWLMVFLSWVAAAAYSYSLLYTKANVAGLGGYIALIKFF!  
LGSCNLLFNALWGALDSL VGFFLPCSVMMGLYAKIFLVARQHVRRLGDN SHQAHMNTENTIRKNH  
SSERKAARTLGI VMGAFFLCWMPFINSIIDPYINFGTPSIVFELLVWLAYFNSTLNPIIYALFY  
PWFQSLKFI VTMKIIFTPHSSDFNVFPER\*

>Sf-taar13c

MNISREPDAEQYCYPASNRTCTKYIHSAAAYAALYAFFALGSAVTVTGNLVVLVLSIAHFRQLHTP  
ANMLIMSLAMADLLVGILVMPFSAIRTIIEGCWYFGEAFCLLHSTFDLFLTSVSI FHLISIAIDRY  
QAVCNPLRYPTTITIPVAWLMIFLSWGVAAYSYSLLYTKANVAGLEEYIALINCLGSCNLLFNA  
LWAALDSTTEFFLSFSVMMGVYAKIFLVARQHVRRLGDNSHQAHMNTENTIRKNHSSERKAARTL  
GIVMGAFFLCWMPFFINSVIDPYINFGTPSIVFEVLVWLG YFNSTLNPIIYALFYPWFQKSLKFI  
VTLKIFTPHSSDFNVFPER\*

>Sf-taar13d

MNISREPDAEQYCYPASNRTCTKYIHSAAAYAALYAFFALGSAVTVTGNLVVLVLSIAHFRQLHTP  
ANMLIMSLAMADLLVGILVMPFSAIRTIIEGCWYFG!  
AWLMVFLSWGAAAAYSYSLLYTKANVAGLEEYIALINCLGSCNLLFNALWAALDTLAEFFLSCCV  
MIGVYAKIFLVARQHVRRLGDNSHQAHMNTENTIRKNHSSERKAARTLGIVMGAFFLCWMPFFIN  
SIIDPYINFGTPSIVFEVLVWLG YFNSTLNPIIYALFYPWFQKSLKFI VTMKIFTPHSSDFNVF  
ER\*

***Sinocyclocheilus grahami***

>Sg-taar13a

MDLSSKEYDPTQFCYPVAVNNSCLKGTHHVSTQTVVYLLLVLAMTVTILGNLVV IISIAHFKQLQT  
PTNILVMSLALADLLLGLVMPFSMIRSVGGCWYYGDAFCLLHSTFDLFLTSVSI FHLIFIAIDR  
HQAVCYPLQYPARITIPVAWVMVMI SWSMAALYSYGLVYSNANVEGLEEYIESI YCMGSC TLLFN  
ALWGAIDTLIAFLLPCSVMGLYARIFVIAKQHARKLCETNQHENENMFKSSRRSERKAAKTLGV  
VVGAFIICWLPFFINSLIDPYINFSTPIALFEVFVWLG YINSTINPIIYGLFYPWFRKTLIIT  
RRIFEPNSSDINVFTV\*

>Sg-taar13b

FHLKGILKFCSSLLYPTRITIPVAWVMVMI SWSMAALYSYGLVYSKANLEGLEEYSDSI YCMGSC T  
LLFNALWSVLDTL!TFFLPCSVMIGLYARIFVV!  
KKHIRTIGEANQENNVSTFKSSRWSECKAAKTLGVVVGAFIICWLPFFINSM DPYINLSTPFVLF  
EAFVWLG YINSTINPIIYGLFYPWFRKNLSV IITMKIFEPNSSDISVFTV\*

>Sg-taar13c

MDLSQEYDLTQFCFPVAVNNSCLRGTHHVSTQTVVYLLLVSAMTVTILGNSVVI IISIAHFKQLQT  
TNILVMSLALADLLLGLVMPFSMIRSVGDCWYYGDAFCLLHSSFDLFLTSVSI FHLIFIAIDRH  
QAVCYPLQYPTTRITIPVAWVMVMI SWSIAALYSYGLVYSKANVEGLEEYSDSI YCMGSC TLLFNA  
LWSVLDTLTFFLPCSVMIGLYARIFVVAKKHIRTIGEANQHENENMFKTSRRSERKAAKTLGVV  
VGAFIICWLPFFINSLMDPYINFSTPFVLFDTFGWLG YINSTINPIIYGLFYPWFRKSLSLIITM  
RIFEPNSSDISVFTV\*

>Sg-taar13d

MDLSSQEYDPTQFCFPVAVNNSCLKGTHHVSTQTVVYLLLVLAMTVTILGNLVV IISIAHFKQLQT  
PTNILVMSLALADLLLGLVMPFSMIRSVGGCWYYGDAFCLLHSTFDLFLTSVSI LHLVLCIAIDR  
HQAVCYPLQYPARITIPVAWVMVMI SWALIAIYSYSLLYSEANVEGLEEYIESI YCIGHCSLLFS  
KLWSVLDTLITFFFPCSVMIGLYVRI FVVAKKHVRI ISEANQHEIENVFKSSRRSERKAAKTLGV

VVGAFIICWLPFFINSVMDPYINFSTPLALFEVFWLGYINSTINPIIYGFFYPWFRKTLSLIIT  
KRIFEPNSSDINVFTV\*

### >Sg-taar13e

MDLSSQEYDPTQFCFPAVNNNSCLKGTHHVSTQTVVYLLLVLAMTVTILGNLVV IISIAHFKQLQT  
PTNILVMSLALADLLLGLVVMPPFSMIRSVGGCWYYGDAFCLLHSSFDLFLTSVSI FHLIFIAIDR  
HQAVCYPLLYPTKITIPVAWVMVMISWCMAALYSYGLVYSKANVEGLEEYIESIYCMGSCTLLFN  
ALWSVLDTLLTFFLPCSVMI GLYAIIFVVARKHIRTIGEANHHENESTFKSSRRSERKAAKTLGV  
VVGAFIICWLPFFINSLIDPYINFSTPFALFETFWLGYINSTINPIIYGLFYPWFRKTLSLIIT  
LKIFEPNSSDISVFTV\*

## ***Sinocyclocheilus rhinoceros***

### >Sr-taar13a1

MDLSSQEYDPTQFCYPAVNNNSCLKGTHHVSTQTVVYLLLVLAMTVTILGNLVV IISIAHFKQLQT  
PTNILVMSLALADLLLGLVVMPPFSMIRSVGGCWYYGNAFCLLHSTFDLFLTSVSI FHLIFIAIDR  
HQAVCYPLQYPARITIPVAWVMVMISWSMAALYSYGLVYSKANVEGLEEYIESIYCMGSCTLLFN  
ALWGAIDTLIAFLLPCSVMI GLYARIFVIAKQHARKLCETNQHENENMFKSSRRSERKAAKTLGV  
VVGAFIICWLPFFINSLIDPYINFSTPIALFEVFWLGYINSTINPIIYGLFYPWFRKTLSLIIT  
RRIFEPNSSDINVFTV\*

### >Sr-taar13a2

SEANVEGLEEYIESMYCKGSCTLLFN VVWGAIDT\*IAFLLPCSVMVGLYARIFVIVKQHARKLCK  
DKNENMFKSS\*RSEHKAAKTL SVVVGAFIICWLPFFINSLIDPYINFSTPLVLFVFWLGYINS  
TINPIIYGFFWYRKTLSLIITSNKFITSSSDINVFTV\*

### >Sr-taar13b

KFCSLLYPTRITIPVAWVMVMVSWMAALYSYGLVYSKANVEGLEEYIESIYCMGSCTLLFNALW  
SVLDTL!  
TFFLPCSVMI GLYARIFVVAKQHIRTIGEANQHENVSTFKSSRQSECKAAKSLGVVMGAFIICWL  
PFFINSMDPYINFSTPFALFEAFVWLG YINSTINHIIYGLFYPWFKKNLSVIITLKI FEPNSSDI  
SVFTV\*

### >Sr-taar13c1

FWNVPCYPLQYPTRITIPVAWVMVMISWSMAALYSYGLVYSKANVEGLEEYSDSIYCMGSCTLLF  
NALWSVLDTLLTFFLPCSVMI GLYARIFVVAKKHIRTIGEANQHENENMFKTSRRSERKAAKTLG  
VVVGAFIICWLPFFINSLMDPYINFSTPFVLFDTFGWLG YINSTINPIIYGLFYPWFRKSLSLII  
TMRIFEPNSSDISVFTV\*

### >Sr-taar13c2

MDLSQEYDLTQFCFPAVNNNSCLRGTHHVSTQTVVYLLLVSAMTVTILGNSVVI IISIAHFKQLQTP  
TNILVMSLALADLLLGLVVMPPFSMIRSV DGCWYYGDAFCLLHSSFDLFLTSVSI FHLICIAIDRH  
QAVCYPLQYPTTRITIPVAWVMV

>Sr-taar13d

MDLSSQEYDPTQFCFPAVNNNSCLKGTHHVSTQTVVYLLLVLAMTVTILGNLVVVIISIAHFKQLQT  
PTNILVMSLALADLLLGLVVMPPFSMIRSVGGCWYYGDAFCLLHSTFDLFLTSVSIHLVLCIAIDR  
HQAVCYPLQYPTRITIPVAWVMVMISWALIAVYSYGLLYSEANVEGLEEYIESIYCIGRCSLLFS  
KLWSVLDTLITFFFPCSVMIGLYVRI FVVAKKHVRI ISEANHETENVFKSSRRSERKAAKTLGV  
VVGAFIICWLPFFINSVMDPYINFSTPLALFEVFWLGYINSTINPIIYGFFYPWFRKTLSLIIT  
RRIFEPNSSDINVFTV\*

>Sr-taar13e

MSLFGKDATSSSHLALGILCHSSLQILSSSVRLDGKRWWTAIFRSLQRCSIGFNGDAFCLLHSSF  
DLFLTSVSIHFLIFIAIDRHQAVCYPLLYPTKITIPVAWVMVMISWCMAALYSYGLVYSKANVEG  
LEEYIESIYCMGSCSTLLFNALWSVLDTLTFFLPCSVMIGLYARIFVVARKHIRTIGEANHHENE  
STFKSSRRSERKAAKTLGVVVGTFIICWLPFFINSLIDPYINFSTPFALFEAFVWLGYINSTINP  
IIYGLFYFPWFRKTLSLIITLKIFEPNSSDISVFTV\*

**Salmo salar**

>Ss-taar13a

MDISSHQHLDPKMFYCYPESNASCTRDIFSGGVQIALYFLFVSGMLVTILGNGVVIISIAHIKQLH  
TPTNMLIMSLAVADLLLGVTVMPFSTMRAVEGCWYFGDAFCLLHSSFDMFLTSVSIHFLVFIAID  
RYEAVCNPLRYSTKITIPIAWLMVLASWAVAALYSYCLLYSKANVRGLDEFIASIYCLGSCNLVF  
NALWGALDTLIAFFFPCSVMVGLYTKIFLVAKEHLRKI EDSQKNSNERDKGVVSQRSERKAAKTL  
GIVGVFIFCWL PFFVNSIVDPYTNFSTPPILFEVFIWLGYFNSTANPIIYGLFYFPWFRKCLNLI  
VTLKIFNRNSSYINVFATT\*

>Ss-taar13b

MNISSHQHLDPKMFYCYPESNASCTRDIFSGGVQIALYFLFVSGMLVTILGNSVVIISIAHIKQLH  
TPTNMLIMSLAVADLLLGVTVMPFSTM RPVEGCCYFGDAFCLLHSDMFLTSVSIHFLVFIAIDRY  
EAVCNPLRYSTKITIPIAWLMVLASWAVAALYSYCLLYSKANVRGLDEFIASIYCLGSCNIVFNA  
LWGTLDTLIAFFFPCSVMVGLYTKILLVAKEHLRKI DDSQKNSNERDKGVVSQRSERKAAKTLGI  
VVGVFIFCWL PFFVNSIVDPYTNFST!  
YSLFEVFIWLGYFNSTANPIIYALFYFPWFRKCLNLI VTLKIFNRNSSYINVFAT

>Ss-taar13c

MDISSHQHLDPKLFYCYPESNASCTREIVS\*GVQIALYFLFVSGMLVTILGNSVVIISIAHIKQLH  
TPTNMLIMSLAVADLLLGVTVMPFSTM RPVEGCCYFGDAFCLLHSDMFLTSVSIHFLVFIAIDRY  
EAVCNPLHYSTKITIPIAWLMV FASWAVAALYSYCLLYSKANVRGLDEFIASIYCLGSCNIVFNA  
LWGALDTLIAFFFPCSVMVGLYTKILLVAKEHLRKI EDSQKNSNERDKGVVSQRSERKAAKTLGI  
VVGVFIFCWL PFFVNFIVDPYTNFSTPPILFEVFIWLGNFNSTANPIIYALFYFPWFRKCLNLI V  
FYLFLIIYLFHLYLTR\*

## Reference TAAR sequences from all classes (class I, II, III) in several bony vertebrate species (zebrafish, stickleback, fugu and mouse)

Amino acid sequences were taken from Hussain et al., 2009, see also Suppl. Table 1.

### >Mm-taar1

MHLCHAITNISHRNSDWSREVQASLYSLMSLIILATLVGNLIVIIISISHFKQLHTPTNWLLHSMA  
IVDFLLGCLIMPCSMVRTVERCWYFGEILCKVHTSTDIMLSSASIFHLAFISIDRYCAVCDPLRY  
KAKINISTILVMILVSWSLPAVYAFGMIFLELNLKGVEELYRSQVSDLGGCSPFFSKVSGVLA  
TSMFYIPGSVMLFVYYRIYFIAKGQARSINRTNVQVGLGKSKQAPQSKETKAAKTLGIMVGVFLVC  
WCPFFLCTVLDPFLGYVIPP SLNDALYWFGYLSALNPMVYAFFYPWFRRALKMVLLGKIFQKDS  
SRSKLFL

### >Mm-taar2

MASFEAQQETFDCEYGNNGSCPENERSLGVRAAMYSLMACAFITIFGNLAMIISISYFKQLHTP  
TNLLILSMATVDFLLGFTIMPYSMVRSVENCWYFGLTFCKIHYSFDLMLSITSIFHLCSVAVDRF  
YAICHPLHYCTKMTIPVVRLLLLVCWSVPGAFAGVVFSEAYADGIEGYDILVACSSSCPVMFNK  
LWGTTLFVAGFFTPSSMMVGIYGKIFAVSKKHARVIDNLPENQNNQMRKDKKAAKTLGIVMGVFL  
LCWFPCFFFTILLDPFLNFSTPAVLFDALTWFGYFNSTCNPLIYGFYFYPWFRRALKYILLGKIFSS  
HFHNTNLFQKETE

### >Mm-taar3

MDLIYIPEDLSSCPKFGNKSCPPTNRSFRVRMIMYLFMTGAMVITIFGNLVIIISISHFKQLHSP  
TNFLILSMATVDFLLGFVIMPYSMVRSVESCWYFGDSFCKFHASFDMMLSLTSIFHLCSIAIDRF  
YAVCDPLHYTTTMTVSMIKRLLAFCWAAPALFSFGLVLSEANVSGMQSYEILVACFNFCALTFNK  
FWGTILFTTCFFTPGSIMVGIYGKIFIVSRRHARALSDMPANTKGAVGKNLSKKKDRKAAKTLGI  
VMGVFLACWLPFLAVLIDPYLDYSTPIIVLDLLVWLGYFNSTCNPLIHGFYFYPWFRKALQFIVS  
GKIFRSNSDTANLFPPEAH

### >Mm-taar4

MNTPDPWSSPEVQFCFAAANSSCPKARPALVVCAMYLIMIGAIVMTMLGNMAVIIISIAHFKQLH  
SPTNFLILSMATVDFLLSCVMPFSMIRSIESCWYFGDLFCKVHSCCDIMLCTTSIFHLCFISVD  
RHYAVCDPLHYVTQITTRVVGVFLLISWSVPIFFAFGLVFSSELNLIGAEDFVAAIDCTGLCVLIF  
NKLWGVLASFIAFFLPGTVMVGIYIHI FTVAQKHARQIGTGPRTKQALSESKMKATSKKESKATK  
TLSIVMGVFLCWL PFFVLTITDPFIDFTTPEDLYNVFLWLGYFNSTFNPIIYGMFYFYPWFRKALR  
MIVTGTIFRSDSSTSSLHPAHP

### >Mm-taar5

MRAVLLPGSGEQPTAFQYQVNGSCPRTVHPLAIQVVIYLACAVGLITVLGNLFVVFVAVSYFKVL  
HTPTNFLLLSLALADMLLGLLVLPSTVRSVESCWFFGDFLCLRLHTYLDTLFCLTSIFHLCFISI  
DRHCAICDPLLYPSKFTVRTALRYIVAGWGIPAAytaFFLYTDVVERALSQWLEEMPCVGCQLL  
FNKFWGWLNFPAFFVPC LIMISLYLKI FVVATRQAQQIRTLQS LAGAVKRERKAAKTLGIAVGI

YLV CWLPFTVDTLVDSL NFI TPPLVFDI FIFW FAYFNSACNPI IYVFSYRWFRKALKLLLSREIF  
SPRTPTVDLYHD

>Mm-taar6

MGSNSSPPTVLQLCYENVTGSCVKTPYSPGSRVILYAVFGFGAVLAVFGNLMVMISILHFKQLHS  
PTNFLIASLACADFGVGISVMPFMSVRSIESCWYFGRSFCFTFHTCCDVAFICYSSLFHLSFISIDR  
YIAVTDPLVYPTKFTVSVSGICIGVSWILPLVYSGAVFYTGVDGGLLEELSSALNCVGGCQVVVN  
QNWVLIDFLSFLIPTLVMIILYGNIFLVARQQAKKIENIGSKTESSESSEYKARVARREKAAKTL  
GITVVAFMISWLPYSIDSLVDAFMGFITPAYIYEICVWCAYYNSAMNPLIYALFY PWFKKAIKVI  
MSGQVFKNSSATMNLFSEQI

>Mm-taar8a

MTSNFSQPALQLCYENTNGSCIKTPYSPGPRVILYMVYGFAGVAVLAVCGNLLVVISVLHFKQLHSP  
ANFLIASLASADFLVGISVMPFMSVRSIESCWYFGDAFCSLHSCCDVAFICYSSVLHLCFISVDRY  
IAVTDPLVYPTKFTVSVSGICISISWILPLVYSSAVFYTGISAKGIESLVSALNCVGGCQIVINQ  
DFVLISFLLFFIPTLVMIILYSKIFLVAKQQAVKIETSVSGNRGESSESHKARVAKRERKAAKT  
LGVTVVAFMVSWLPYTIDALVDAFMGFITPAYVYEICCWGTYNSAMNPLIYAFFFPWFKKAIKLI  
ILSGEILKGHSSTANLFSE

>Mm-taar9

MTSDFSPPEMELCYENVNGSCIKSSYAPWPRAILYGV LGLGALLAVFGNLLVIAAILHFKQLHT  
PTNFLVASLACADFLVGVTVMPFSTVRSVESCWYFGESYCKFHTCFDTSFCFASLFHLCCISIDR  
YIAVTDPLTYPTKFTVSVSGLCIALSWFFSVTYSFSIFYTGANEEGIEELVVALTCVGGCQAPLN  
QNWVLLCFLFFLPTVVMVFLYGRIFLVAKYQARKIEGTANQAQASSESYKERVAKRERKAAKTL  
GIAMAAFLVSWLPYIIDAVIDA YMNFI TPAYVY EILVWCVYYNSAMNPLIYAFFYPWFRKAIKLI  
VSGKVFRADSSTTNLFSEEAGAG

>Dr-taar1b

MDLCYEAMNGSCWKYVRPHAIHVPMLIAIMLIISMTFIGNLLVVISIGHFRQLHTPTNQLILSLA  
LCDFLIGLGFVMPLSAVRSMQGCWYFGEFLCKLHTCIDITLSTSSIFHLVSVSAERFCAVCGPLRY  
RSCFGLSTVLLMISISWLI PGIFAYVMTFLEINI HGGKDFYDAHVRCVGGCHVFFSHGPAVFTSV  
FSFYIPGFIIVVIYSRIYMVARNQERSIRLQLNQLRRVYPSRDVQLQTRKATVTIAIVVGAFLVC  
WTPFFLCNINLPFIGYATPPMLIDVLMWFGYANSTLNPF IYAFMHSWCRKAVRIIVTGEIFKNNS  
SRKDLYT

>Dr-taar10a

MDDHINISQTESWEKPLLCEFSNRSCQKFVYPLDTRILLYMLFSISSIITIIGNLLVITVVHF  
RQLHTPTNYLILSLAVADLLVGGVVMPPSMLRSIETCWYLGDLFCFKIHSSLDVTLCTASILNLCI  
ISLDRYYAICHPFQYHSMKMTSLATLIMIICWTVSAVLGFGMIFMELNILGVEDFYENIRCDGG  
CFVVFQSKTGGTVFSLICFYIPAFVMLGVYLKILHEAQRQVQAIQSVNSELKKEGKATKTLAIMG  
VFLTWFIPFFLCNLI DPLIGYSVPSLVFDLFLWVGYYNSTCNPIVYAFFYSWFRHAFRVILSKRV  
FQTNSSRTILM



>Dr-taar11

MMNQSHQWSAETFSLCFESINDSCVKT VYSPVFRAPLYLLFIIAIIILIVFGNLWVICTISFFQQL  
HTPTNYLILSMAVSDLLLG SFVMPPSMLRSLETCWYFGDFFCKFHSATDFTLCNASVLHLVFI SI  
DRYYAVCQPFHYQSRMTTRVSVFMILISWSFSAFFGFGIIFSELKIEKKRTEELHVACKGGCLAL  
HGREGVTVYSLVVFYFLPMFIIIVSLYSRVFIIALKHVRVINSAASSL SATKMDLKATKTLAIIIGV  
FMSCWTPYFMCNIIIDPIVNHTIPALLYEVL MWVAYLNAVFNPLVYAFFYSWFRDKSKLLLEKLYK  
LC

>Dr-taar12a

MIKKKIIQDVM TSNQTQ TENILLCYPLLSNSCPKLRHLAVVQVGLYVFLLLMILT TVFGNLMII  
SISHFKHLQSP THLIVQSLAACDCLMGSLVMPYSMVRSVEGCWYLG DVVCKVHFSFDVTFCISSL  
LHLCLISVDRYLAICDPLRYKIRVTNTTMTVFIIFIWLF SVVYSFSIVFSGITAVGLEMLILQTY  
CVGSCVLFNFKEWAVYPFLTFFITGAIMSSLYMKIFHVARKHAKVMSE RVKGGLKSQRSAQRERK  
AAKTLAIVMGVFMFCWLPYCAFTALYPFFFTFLNSAEVFDVLFWFAYFNSSCNPLIYGF FYPCFQK  
AFKILIFLWSQKCKHFSF

>Dr-taar12b

MTSNETQTDNILLCYPLLSNSCPKLRHLAVVQVGLYVCLLLMILT TVFGNLLIIISISHFKHLQS  
P THLIVQSLAACDCLMGSLVMPYSMVRSVEGCWYLG DVVCKVHSSLDMTFCMSSLLHLGLISVDR  
YWAICDPLRYRLRV TNTTVTVFIIVIWLF SFIYNFSIVFSGITAVGLEMLILQTYCVGSCIVL FN  
KEWAVYPFLTFFITGAIMSSLYMKIFHVAQKHAKVMSE RVTGGLKSQSSAQRERKAAKTLAIVMG  
VFMFCWLPYCAFTALYPFFFTFLNSAEVFDVLFWFAYFNSSCNPVIYGF FYPCFQKAFKILISTYI  
FGIRNANTSTYE

>Dr-taar12c

MTSNETQTDNVHLCFPLLPNSCSKLRHFFVVKVAMYVCLLLMILT TVFGNLLIIISISHFKHLQS  
P THLIVRSLAASDCLLGSLVMPYSMVRSVEGCWYLG DVVCKVHSSLDMTFCISSLLHLGLISVDR  
YWAICDPLRYRLRV TNTTVTVFTVFIWLF AFVYSFSVVFSGIAAVGLEMLILQTYCVGSCVLF FN  
KEWGLICPILTFFLPGAIMSFLYMKIFHVARKHAKVMSE RVTGGLKSQSSAQRERKAAKTLAIVM  
GVFMFCWLPYFTVTILGPFFNFATPADVFDALVWFAYLNSTCNPLIYGF FYPCFQKAFHILISTYI  
ICGVRNSDTLIYE

>Dr-taar12d

MTSNETQTDNVHLCFPLLPNSCSKLRHFFVVKVAMYVCLLLMILT TVFGNLLIIISISHFKHLQS  
P THLIVRSLAASDCLLGSLVMPYSMVRSVEGCWYLG DVVCKVHSSLDMTFCISSLLHLGLISVDR  
YWAICDPLRYRLRV TNTTVTVFTVFIWLF AFVYSFSVVFSGIAAVGLEMLILQTYCVGSCVLF FN  
KEWGLICPILTFFLPGAIMSFLYMKIFHVARKHAKVMSE RVKGGLKSQSSAQRERKAAKTLAIVM  
GVFMFCWLPYCAFTALYPFFFTFLNSAEVFDVLFWFAYFNSSCNPLIYGF FYPCFQKAFKILIFLW  
SQKCKHFSF

>Dr-taar12e

MMSLNETQ TENILLCYPLLSNSCPKLRHLAVVQVGLYVFLLLMILT TVFGNLLIIISISHFKHLQ  
S PTHLIVRSLAACDCLLGLLVMPYSMVRSVEGCWYLG DVVCKVHSSLDMTFCISSLLHLGLISVDR  
RYWAICDPLRYRLRV TNITVTVFIVFIWLF SFVYSFYVVFSGVNTVGL ET FIMQVYCVGSCVLYF  
NKQWGLICPILVFFLPGAIMSFLYMKIFHVARKHAKVMSE RVTGGLKSQSSAQRERKAAKILAI V

MGVFLFCWLPFFFTVNALDPFFNFFTPADIFDAVIWFAYLNSTCNPLIYGFFYPFCFQKAFKILIFT  
YICGVRNLDTF

>Dr-taar12f

MKPSNETQ TENILLCYPLLSNSCPKLRHLAVVQVGLYVFLLLMILTTVFGNLLIIISISHFKHLQ  
SPTHLIVRSLAACDCLLGSLVMPYSMVRSVEGCWYLGDVVCKVHSSLDMTFCISSLLHLGLISVD  
RYWAICDPLRYRLRVNTTNTVTVFIVFIWLFSEFVYSFYVVFSGVNTVGLETFIMQVYCVGNCVLYF  
NKQWGLICPILTFFLPGTIMSSLYMKIFHVARKHAKVMSEKVSAAATAGSHFQTSSHRERKAAKILAI  
MGVFLFCWLPFFFTVNALDPFFNFFTPADIFDAVIWFAYLNSTCNPLIYGLFYPCFQKAFKILIST  
YLCGVRNLDTF

>Dr-taar12g

MTSNESENIQLCYPLLSNSCPKLRHLAVVQVGLYICLLLMILTTVFGNLLIIISISHFKHLQSPT  
HLIVRSLAACDCLLGSLVMPNSMVRSVEGCWYLGDVVCKVHSSLDMTLCISSLLHLGLISVDRYL  
AICDPLRYRIRVTNTTNTVTVFIVFIWLFSEFVYSFYVVFSGITAVGLEMLILQTYCVGRCVFFFNKQ  
WGLICPVLAFFLPGAIMSSLYMKIFHVARKQAKVISERVGTGGLKSQSSAQERKAAKTLAIVMGV  
FLFCWMPFFTLTALDPFFNFSSADVFDFALVWFAYLNSACNPLIYGFFYPFCFQKAFKILIFTYIC  
GVKKANTLTFE

>Dr-taar12h

MILNDTDIYSENVLLCYPLLPDSCPRTQRLPALKVAMYAVMVLMLTTVFGNLLVIIISISHFKQL  
QSPTHLIVQSLAACDCLLGSLVMPYSMVRSVEGCWYLGTVVCKVHSSLDMTFSISSILHLSLIAI  
DRFWAISDPLRYKMRVTNTTVAGFITFTWLFSEFVYSFVFTGVNNGLEELILQISCFGGCVLF  
FNKEWGLICALFVFLIPGTIMSSLYMSIFNVVKRHAKVMSEKVSAAATAGSHFQTSSHRERKAAK  
TLAIVMGVFYLCWLPFFTATAVDPFLNFSTPGDVFDALVWFGYFNSTCNPLIYGFFYPRFQKAFK  
ILISTYICGSSDSHTLTFE

>Dr-taar12i

MTSNETQTDNVHLCFPLLPNSCSKLRHFFVVKVAMYVCLLLMILTTVFGNLLIIISISHFKHLQS  
PHTLIVRSLAASDCLLGSLVMPYSMVRSVEGCWYLGDVVCKVHSSLDMTFCISSLLHLGLVSDR  
YWAICDPLRYRIRVTNTTNTVTLTYTIFIWLFSEFLYSFVIVFSGVNRIGLETFIMQVYCVGSCVLFN  
KEWGLICPVLTFFIPGAIMSSLYMKIFHVARKHAKVMSEKVSAAATAGSHFQTSSHRERKAAKTLAIV  
GVFLLCWTPIFIASIIDSFNFVTPAGVFDALVWFGYFNSTCNPLIYGFFYSCFQKAFKILLSSL  
FLGFGNSSTLTFE

>Dr-taar12j

MTSNDTDVHSENVLLCYPLLSDSCPRTQRLTALTVTMYAFMVLMLTTVFGNLLIIISISHFKQL  
QSPTHLIVRSLAASDCLLGSLVMPYSMVRSVEGCWYLGDVVCKVHSSLDMTFSISSLIHLSLVS  
DRYWAICDPLRYRMRVTNTTNTVIVFTVFTWLFSEFVYSFVFTGVNNGLEELILQISCFGGCVLFN  
FNKQWGLICSLTFFLPCTIMSSLYMKIFHVARKHAKVMSEKVSAAATAGSHFQTSSHRERKAAKTLAIV  
VMGVFYLCWLPFFTATAVDPFLNFSTPVHVF DALVWFGYFNSTCNPLIYGFFYPRFQKAFNILIS  
TYICGSSDSHTLIPE

>Dr-taar12k

MTSNQTQ TENILLCYPLLSNSCPKLRHLAVVQVGLYVFLLLMILTTFVGNLMI I I S I SHFKHLQS  
P THLIVQSLAACDCLMGSLVMPYSMVR SVEGCWYLG DVVCKVHFSFDVTF C I S S L L H L C L I A I D R  
F W A I S D P L R Y K M R V T N T T V A G F I T F T W L F S F V Y S F S V V F T G V N N V G L E E L I L Q I S C F G G C V L F F N  
K E W G L I C A L F V F L I P G T I M S S L Y M S I F N V V K R H A K V M S E K V S A A A T A G S H F Q T S S H R E R K A A K T L  
A I V M G V F Y L C W L P F F T A T A V D P F L N F S T P G D V F D A L V W F G Y F N S T C N P L I Y G F F Y P R F Q A F K I L  
I S T Y I C G S S D S H T L T F E

>Dr-taar12m

MAANETDVYAENVFLCFPLRLDSCLSAQRLTTVKVAMYILMLLIIFLTVFGNLLVVVVSISYFKHL  
QSP THLIVQSLAACDCLLGLVMPYSMVR SIEGCWYLG DVICKVHSSLDMTLSISSKMHL SLISV  
D R Y W A I C D P L M Y R T R V T N Y S I T V F I M C A W L F A F V Y S F S I V F S E V N L I G L E V L V L Q I S C L G S C V L L  
F N K P S A L I C S I L T F F L P G A I M S S L Y V K I F R V A S K H A K V L S E R V S V L E I K S Q T Y A Q R E R K A A K I V A  
I V V G A F L L C W L P F F V A T A L D P F L D F W T P A D V F D A L V W F G Y F N S T C N P L I Y G F F Y P R F Q A F K I L M  
S T V M C G S S S S R T L A F G

>Dr-taar13a

MDLSSQEYDPSQFCFPVAVNNSCLKGTHHVSTQTVVYLILASAMTVTILGNSVVIISIAHFKQLQT  
P T N I L V M S L A L A D L L L G L V V M P F S M I R S V D G C W Y Y G E T F C M L H S T F D L F L T S V S I L H L V C I A V D R  
H Q A V C Y P L Q Y P T R I T I S V A W V M V M I S W T L I A I Y S Y G L V Y S K A N V E G L E E Y I E S I Y C M G H C S L L F S  
K L W S V L D T F I T F F F P S C I M V G L Y I R I F V V A N K H A R V I T E A N P N E N E N V F K S S R R S E R K A A K T L G I  
V V G A F I I C W L P F F I N S L M D P Y I N F S T P V A L F D A F V W L G Y I N S T I N P I I Y G F F Y P W F R K T L Y L I I T  
R R I F E P N S S D I N V F T V

>Dr-taar13b

MDLSSQEYDPSQFCFPVAVNNSCLKGTHHVSTQTVVYLVLASAMTVTVLGN SVVIISIAHFKQLQT  
P T N I L V M S L A L A D L L L G L V V M P F S M I R S V D G C W Y Y G E T F C L L H S T F D L F L T S V S I L H L V C I A V D R  
H Q A V C Y P L Q Y P T R I T I S V A W V M V M I S W A V I A I F S Y S L M Y S K A N M E G L E E Y I E S I Y C M G H C S L L M N  
K L W S V L D T F I T F F F P S F V M V G L Y I R I F V V A K K H A R V I T E A N P N E N E N L F K S S R R S E R K A A K T L G I  
V V G A F I M C W L P F F I N S T L D A Y I N F S T P V A L F D A L V W L G Y V N S T I N P I I Y G F F Y P W F R K T L S L I V S  
L K I F E P N S S D I N V F T V

>Dr-taar13c

MDLSSQEYDPSQFCFPVAVNNSCLKGTHHVSTQTVVYLILASAMTVTVLGN SVVIISIAHFKQLQT  
P T N I L V M S L A L A D L L L G L V V M P F S M I R S V D G C W Y Y G E T F C L L H T G F D L F L T S V S I F H L I F I A V D R  
H Q A V C F P L Q Y P T R I T I P V A W V M V M I S W S M A A F Y S Y G V V Y S K A N L E G L E E Y I A S V Y C M G G C T L Y F N  
A L W S V L D T L L T F F L P C S V M V G L Y A R I F V V A K K H I K S I T E A N Q N E N E N V F K N P R R S E R K A A K T L G I  
V V G A F I L C W L P F F I N S L V D P Y I N F S T P Y A L F D A F G W L G Y T N S T L N P I I Y G L F Y P W F R K T L S L I V T  
L R I F E P N S S D I N L F T V

>Dr-taar13d

MDLSSQEYDPSQFCFPVAVNNSCLKGTHHVSTQTVVYLILASAMTVTILGNSVVIISIAHFKQLQT  
T T N I L V M S L A L A D L L L G L V V M P F S M I R S V D G C W Y Y G E T F C M L H S S F D L F L T S V S I F H L I F I A V D R  
H Q A V C F P L Q Y P T M I T I P V A W V M V M I S W S M A A L Y S Y G L V Y S K A N M E G L D E Y I Q S M Y C V G G C T L Y F N

ALWSVLDTLITFFLPCSVMI GLYARIFV VAKKHARI INE ANQNEIDGTFKSSRRSEQKAAKTLGI  
VVGAFIMCWL PFFINSLMDPYINFSTPVALFEAFVWLG YINSTMNPIIYGFFYPWFRKTLYLII T  
RRIFEPNSSDINIFTL

>Dr-taar13e

MDLSAQEYDASQFCFP AVNNSCLKGTHHVSTQTVVYLV LASAMTVTILGNSVVIISIAHFKQLQT  
PTNILVMSLALADLLLGLVVM PFSMIRSV DGCWYYGETFCL LHSSFDMFLTSVSI FHLIFIAVDR  
HQAVCFPLQYPTMITIPVA WVMV IISWSMAAFYSYGLVYSKANVEGLEEYIESIYCMGGCTLLFN  
ALWGAIDTLVAFFLPCFVMIGLYARIFMIAKKHARKLGEANQHDNENLFKSSRRSERKAAKTLGI  
VVGAFVICWL PFFINSMMDPYINFSTPGVLFEAFVWLG YMNSAINPIIYGLFYPWFRKTLYLII T  
LRMFEPNSSDINVFTV

>Dr-taar14f

MNLTAVNQ TDMCEDYSCPERSV SLSVYVILYVAAA VALLTVCGNLLV IISVSHFKQLHTPANIL  
ILSLAASDLLVGVFVIPLHLSWVIESCWISGPV VCLVFKLVNYQATS VSVHTVALIAVDRFLALS  
FPPFYSEKISLTVVCTAALLNWLFSLIYNFTLFYV NENFTVVVCPGVCFHHL DGISSLIDLLIVF  
VMPCTLI IILYTHVFVIAKKHATAIRALQVHNSTESSKNKISDKSERKAAMLLGILVVFVLLC LL  
PYYITFLVIPYGSIIYMYVINVAVIFFFLNSTINPIIYALFYSWFKKSLKLI FTFKVFHKDSSLM  
NVM

>Dr-taar15a

MEFQEHHCLSHWNTSCSLDFHLSYVNVFLFLYIS AISVLTVCGNLLVIVSIAVFKQLHTPTNLLI  
LSLAISDLLV GICLMPVESIRSINSCFYMGKSHCHIFHSIMSIVGSASLMNIMLVAIDRYFAVCN  
PLLYMSKMTIRKALICVGLGWTV SICYNLVPVNLGNSDPTGAVVCLRECAVA FSNWGPADLIV  
TFIAPCITLLILYIRILTVALKQAKAISNMTKKNGSQPSRKSEVKATKTLSTIVFVYLICWIPWY  
ASMLNMEQFNKSPVSLTALLCLFYTNSCINPFIY AISYPWFKRSVKLVVSLRILQTATNQLNLFA  
EDC

>Dr-taar16a

MKDKNLEIQFCFPNNLSCFKEIKPQTDYVVLYIFIFLASV VTVFLNLLV IISISHFRQLHTPTN  
LLILSLAVADLIVGLIVIPFMGIRFIDSCWYYGETFCSVFLFITFAV VSGSLGNLVLISLDRYIA  
VSDPLRYTVKITTD RIVICIVVNWLCSSIYSFIFLYNSVFYPETQNGCYGDCRV SFKFEHFVTDL  
LVTFVAPSCVIMS IYVKIFCVAKHQAKVNSVTGVS KSKQRKAGKTLGIVVMVFFMCWIPYYIVIL  
IEGNELTESVEFNVTCWIVYMNSCMNPLIYSLFYKWFRI SAKHILT LNILKLSSEYFNLF PEDK

>Dr-taar17a

NKLLTGAESLMAYETEETQYCYPAFNSSCVKGKRSNYESN ILYVFFSLLSAWTVFLNLLVIFSI S  
HFKKLHTPTNMIILSLSVADLLVGLIVMPIEATEL IETCWYFGDTLCNLFLIILMGLLTSTSLCSL  
VLIAVD RYVAVCHPLMYPQTITMNRTL IIVCFSWFFSSAYNIILSITH TSDGCYGE CNVQLTFEW  
KATDLVLSFLLPCTV IITLHLRIFVYVHQQVKVINSQMKSEKCVMEG SVKRKSES KAALILGIIV  
AIHLICFITYYIILTLTDSMAIPPTVLSCLICFLYINSSLDPLLYALFYTWFRKSIKHILT LKIFQ  
PESSQVNILT NH

>Dr-taar18a

MKGQKGEQNKLLTGGDSL MAYETEDQETQYCFPDINSSCVKENRSKHEY NIMYVFFSLLSAWTVF  
LNLLV I I S I SHFKKLHTPTNMI ILSLAVNDLLLGLIVMPVDAVKLIETCWYFGDILCDLYMI IMG  
LLLSASLSNLILIAVDRYVAICHPLLYPQKITMTRTLISIFVCWFVCLTNNIAFLVSSRHFDILQ  
KTNMCHGQCTLIVSFSWTFDLDLFLSFLVPCTLIITLYLRIFYVAYQQVKVINAIKGGKCAVEGS  
VKRKSERKAALTLGIVVTVYLLCYIPYYILSVIGTTVISSTMKILIWSLYINCLNPLIYALFYR  
WFKISVKCVLTLKILEPASSLLDIFKDNS

>Dr-taar19a

NKLLTGGDLLMAYETEDQETQYCFPDINSSCVKGRHSSHGYII IYLFVSLLSVWTVFLNLLV I I S  
I SHFKKLHTPTNMI ILSLAVNDLI IGLFVIPIQAIKLIETCWYFGDTFCGLYLF LIFELLSASLS  
NLVLI AVDRYVAVCHPLLYPQKITITKTLMSICLSWVCYSAYNTALI INNRYSETSHRTDECYGR  
CFIVMSFSWLVA DLVMSFIFPCLIMITLYLMI FVYVHQVQVMNSLMKGGKCVTEGSVKRKSESK  
AALTLGI IVTIYLLCYIPYYICSLVNSSTAIHVMSWTVYVNSGMNPLVYALFY PWFKKTAKI I F  
TLKIFQPASSLINIFTE

>Dr-tar20a

MKGQKGEQNKLLTGGDSL MAYETEDQETQYCFPDINSSCVKEQHSSHGYII IHLFVSLLSAWTVF  
LNLLV I I S I SHFKKLHTPTNMI ILSLAVNDLFIGIAMPVEAIRLIETCWYFGDTFCVLYLFFVAL  
LLSPSLGNLFLIAVDRYVAVCHPLLYTQKTTIAKIFCLSI CLSCVCF SAYFTALVNVNNDQDFDTS  
QRTDVCYQGQCLVMITFSWIVIDL FVSFIFPCTLIMMFYLRI FVYVHQVQKVINSLMKGGKCVTEG  
SVKRKSESKAALTLGI IVSVYLLCYIPYYICSLTVNSSTAINVLVWLVSNSGMNPLVYAI FYPW  
FKKTAKLILTLKIFQPASSLINIFTEL

>Ga-taar21a

MEPEETDNGFNAVSDLHPCYESDNGTYSFTSNFSI SCVSLYVFLGGLSVVTICGNLLV I I SVSYF  
KQLHVATNFLILSLAVADLLVGVVVFPPFSMVFTVTSCWHHEGLFCKVRRGGFDVTLSTASILHLCC  
I SIDRYYAVCQPLSYKSKVNDRV TGMMLMSWAVPLLIGICII IAGFNQKGCEESCLIDALISTT  
LACIFSFYIPVI IMLSIY LKIFLVAKRQAISI QIT TGLTKKSGTTVSKRERKATKTLAIVLGVEL  
LCWAPYFLCMIFQPITYNVTPIAVIETLNWLTLNSMNLNPFIIYAFFYSWFRSAFKMI ISGKVFWG  
NLENSKLL

>Ga-taar22a

MDGMEGAQLCFPQLLNSSCRGLLRPRTESVLLYTLLSSMAVLTVLLNLLV I I S I SHFAQLHTPTN  
LLLLSLAISDLLVGLLVMPSEMVSVIETCWLLGDLLCTLSTMMGSTLVSASVGNMVLISIDRYVA  
ICYPLQYPIQITRSRISVLYNGLILKDRLRQPDRDNSCDGECKVVINNVSGAIDL VFTFFAPCSV  
IVVLYVRVFTVAVSQARVGSHTAVGAVKITAKKSERKAARTLGMVILVFLISFCPFYYPALAGQ  
EISNNASSWVIVSWLLFFNSCLNPLIYALFY PWFVKAVKLIVTLKILEQNSSQENII

>Ga-taar23

MAEHASQLCFPQLLNVSCRKPSVLWNDVLSLALMSVSALTVALNLVVI I SVSLFRHLHTPTNIL  
IVSLAVSDLFVGLLVMPVEILFRVSCWFLGDLV CALFN YVFFI I TSVSVGTMVLISLDRYLSICE  
PLHYATRVTVKVRCSVCTCWLCSVCYSGVLASDGVTPSGRYSSCHGECLIVIDYVTVTVDLVVT  
FGVPVSVIVVLYMRVFAVAASQARSLRSHVLVVTHQLPVGQRAKKSELKAARTLGVLVVLFLICF  
CPYYIVSLVGYSQLSNLYMSFVLYLFYLNCLNPLIYALFY PWFVKAVKRIVTLQTGS

>Ga-taar24

METLPGDYLCFPQLNSSCKKPAHPHTEAMLVYVLLSSISLITVVLNVLVIISISHFRQLHSPTNL  
LILSLAVSDLLVGLLLMPVEIIYIEACWFLGDILCTTYLVDYVITSASVANMVLISVDRYIAIC  
EPLHYPTKVKRRVQNCVCFWISAI FRIFLLYDHLEKPGSSNSCLGECVVI INYAAGVADLVF  
TFIIPILCIIVLYLRVFFVALSQARAMRSRVAASTTRRSGATTVKKTEMKAARTLGLVILVFLFC  
FCPYYPALAGKDTSIDASSAAFEIWLAFNSCLNPVIYAFFYPWFRKSIQLILTLQILKPGSCD  
ANVL

>Ga-taar25a

MKSLEEDELCFPHLLNSSCRKAMHPHFVSM LTYILLSSISLLTVTLNLLVIISISHFRQLHTPTN  
LLLLSLAVSDFVGFIVFFQIVVIEGCWFLGDLMCILYIFLDYIITSASVGTMV LISVDRYVAIC  
EPLHYSNKVTQKRKISVCLCWTCSAFLQTL LLLKDNLEEPGRYN SCFGECVVVINYIAGLADLFF  
TFIGPVTVIIVLYMRVFFVAVTQARVMRSHVAVLPHKFSMNITAKKSEMKAARTLG VVIIVVFLLC  
VCPYYCVLLSAQDTL FNISAA FVTCV FNFNSCLNPLIYAFFYPWFTKSMKLI VTLLEILQPGSCE  
RNLL

>Ga-taar26a

METLVGTELCFPQLINTSCRKPIRPHLEAMLIYILLSSISLLTLALNLLVIISISHFKQLHTPTN  
LILLSLAVSDFVGLFVIFQIMIIEGCWLLGDLMC SLWLILSSIIMSSSIGTMVLISVDRYVAIC  
YPLHYFTKVKPKRIRVCVCLCWMFAALFN SLLLKNNLQHPGRYN SCIGECVIEMNYIANVFDLIL  
SFFFPI TVIVILYIRIFGVV VYQARAMRPHIAVVTMKVAVKKSEMKAARNLG VVVVFLICVCPY  
YCFTLTSQNNLYTSLSVTILVWLFQFN SCLNPLIYATLYP WFRKSIKVI VTLQILKPGSYRTNML

>Ga-taar27

MEPVLCYESRNGSCLRTIYSLPIQITVYMILGVI VVLTVFGNLLVTVSIA YFKQLHTPTNYLISS  
LAVCDLLLGLLVMFPSMVQCVE SCWYFGDV FCKVYMSSDVMLCTTSILNLLFISIDRHYAICQPL  
RYREKISVNVV LIMILLSWTISGLIGFGMI FLKLNFWGIEEFYSNHIVCEGECILFQTGLSSIMS  
SVLSFYIPGIILLSVYLKIFLVARRQYSIQI ASRTCSEGISNTSQQKATKTLAIIMGAFLSFWTP  
FFVCNIVDPFISYSTPPALFKTLVWLG YFNSTVNPLIYAFFYSWFRKALKLFTSGIMFKADISET  
TLFTL

>Tr-taar28a

MIYVFRHFQTTTNLLLLSMAVSDLLVGLAVMPLMIVTLDSCRCISSYLCFLFHLLSFVLT SASVG  
NMVLISVDRYVAICYPLRYSSITPNTVKICV SVCWTSSIIYNLVLLKDNILYIDFFSSCNKKCPL  
YINYILAIADIIITFYGPLTVIIVLYTRV FVAVTQARAMRSQVSTTGSKAVSAMKSEMRAARTL  
GIVILFFLICFFPYISSLTGQGISNEDSTGQLFLFFSNSTINPIIYAFFYPWFRKTVKLF LSCQ  
FCKL

# Aminergic receptors used as outgroup (species names, gene IDs: Suppl. Table 1)

## *Adrenergic receptors*

### >Bbe-adra1a

MAGLPLELDNFTLDDNNGTWNVTEADHPSQILGLRMSLPASLLVGAVLSCICILTIAGNVLVVLA  
VCLERSLRTNIGYFYINLAAADLLLGCLVLPFSATRELLNYWPFGEALCELWAAVDVLCCTASIF  
SLCVISLDRYIGVTRPLHNMIVTKRRVVLILFAVWATSAAISVGPLFGWKHPKSYQNMQCNINS  
SPSYIIIFSVVGSFYVPAFVVLVYRQVYRAAVRETSKLMITLKAQEDRNQTPVESVRIHRGKASV  
TAEKRLSPRRLSPNSSKPRMAREALSSVKNRIEKFTKEKKAAKTVGIIVGVFLVCWLPFFVMYPI  
DSMIAKVPPELLITMAFWLGYCNSFLNPIIYACSNGHFRRAFRRFLLCGKRQGRFPTMRTEDYTLS  
SRSSFRRVHSSCSRDRGSRRQQLKIQLQELTVS

### >Cm-adra1a

RAHKVIWLVLGSFILFALLGNILVILSVASHRHLHTATHYFIVNLAIADLLLSSTVLPFSALLEI  
LGRWVFGRLFCNIWAAMDVLCSTASIMSLCVISIDRYIGVSYPLRHPAIMEKRGVLTLVAVWLL  
ALVISVGPLFGWKEPEPEDESVCCKITEVPGYVLFSAFGSFYVPLAIIILMYCQVYVAKRETRSL  
MAGEKREGSDTNKVTLRIHRKNVGGDVSPRSGEHHSRGGHHLKTHFSVQLLKFTRQKKAATLG  
IVVGGFILCWLPPFFVVLPLGSCFPAYRPPETVFKVTFWLGYFNCLNPVIYRCFSQEFKRAFNRV  
LRGECHRRKPPVNQSSSLSSSAHSGAERPKEVVRTQVGTNEAFLGIARPQAPSQWSLLPARPDH  
RTARSPRQPPRALLGSCCGVVVVELQ

### >Lec-adra1a

MFVTHENSTSHLNGTSEGISVSNETSPTVEPRRAVTLALVLGAFIIFAIAGNILVVLVSVVCNKHL  
RTVTNYFIINLASADLLLSSTVLPFSATFEILGYWVFGRIFCDIWAALDVLCCCTASIMSLCAISI  
DRYIGVSYPLRYPTIMTERRVLLILIAVWVLAIVISVGPLLGWKEPAPPDETVCETEVPGYALF  
SAMGSFYIPLVILLAMYCRVYVAARRQTKSLEEGIKRERSSSSEEVTLRIHRRTIAPGEYSLRDT  
SKGPHFRSSLSVRFMKFSREKKAATLGIIVGVFILCWLPPFFIALPIGSFFPSVRPSQTVFKVVF  
WLGYNFNSCINPLIYPCSSQEFKRAFLRALRCHCREGQRRRRQPWGLHHASSTGSSYSGGRKGS  
LSQLHEVHGGCSPDGLCERSRSPDEPSPVSQDSLGRWLLSTSKALSGTALILERANSPQPET\*

### >Mm-adra1a

MVLLSENASEGSNCTHPPAQVNISKAILLGVILGGLIIFGVLGNILVILSVACHRHLHSVTHYYI  
VNLAVADLLLTSTVLPFSAIFEILGYWAFGRVFCNIWAAVDVLCCTASIMGLCII SIDRYIGVSY  
PLRYPTIVTQRRGVRALLCVWALSIVISIGPLFGWRQQAPEDETICQINEEPGYVLFSAFGSFYV  
PLTIILVMYCRVYVAKRESRGLKSGDKTDKSDSEQVTLRIHRKNVPAEGSGVSSAKNKTHFSVR  
LLKFSREKKAATLGIIVGCFVLCWLPPFFLVMPIGSFFPNFKPPETVFKIVFWLGYLNSCINPII  
YPCSSQEFKAFQNLRIQCLRRRQSSKHALGYTLHPPSQAVEGQHRGMVRI PVGSGETFYKISK  
TDGVREWKFFSSMPQGSARITMPKDQSACTTARGFYF

### >Mm-adra1b

MNPDLDTGHNTSAPAHWGELKDANFTGPNQTSNSTLPQLDVTRAISVGLVLGAFILFAIVGNIL  
VILSVACNRHLRTPNYFIVNLAIADLLLSFTVLPFSATLEVLGYWVLGRIFCDIWAAVDVLCC

ASILSLCAISIDRYIGVRYSLQYPTLVTRRKAILALLSVWVLSTVISIGPLLGWKEPAPNDDKEC  
GVTEEPFYALFSSLSGFIYIPLAVILVMYCRVYIVAKRTTKNLEAGVMKEMSNSKELTLRIHKNF  
HEDTSSSTKAKGHNPRSSIAVKLFKFSREKKAATLGIVVGMFILCWLPPFFIALPLGSLFSTLKP  
PDAVFKVFWLGYFNCLNPIIYPCSSKEFKRAFMRILGCQCRGRRRRRRRRRLGGCAYTYRPWT  
RGGSLERSQSRKDSLDDSGSCMSGSQRTLPSASPSPGYLGRGTQPPVELCAFFPEWKPGALLSLPE  
PPGRRGRLDGSPLETFKLLGEPESPGTEGDASNGGCDTTDLANGQPGFKSNMPLAPGHF

### >Le-adra1b

MTFAEFTNESLDGNCNASALS YAVFPNDSVTANRSGNSEGLDQVAVALGVILGAFILFAIVGN  
IMVILSVACNRHLQTVTNYFIINLAIADLLLSTIILPFSASLEIFGYWAFGRIFCDVWAAVDVLC  
CTASIMSLCVISIDRYIGVRYSLRYPTIMTEVKAVWILIVLWVTSIVVSVGPLLGWKEPAPADDT  
MCSITEEPGYALFSSLSGFIYIPLMVILVMYFRIYVVARRTTKSLEAGVKRERSKTMEVVLRIHCR  
SVLDDSHSNFKNKGHHLRSSLMLLKFSSREKKAATLGIVVGVFILCWLPPFFTILPLGR\*

### >Bfl-adra2

QAMKGVQNLFLVSLACSDVTVGTLVMPFKLANELMGYWYFGQWCDIYLALDVFACTASIFNLCA  
ISIDRYWAITKPIKYLMSRTRRRVGIMIAIVWMSALVCLPPLFGWKSGDDSGDEQEASETPGCQ  
LNSSPGYVVFSSVSFIYIPLGVLI FVYTSIIRAVRKRFRKFRNKNGEWKQICNVRLKDSYDVPGYV  
RSRGAISSPGKSRGHSQCQDGLQRPEKELQVLEALQPLKSPGFSPRGPYFDGKMVVLPTKTTPI  
VDNVRKVREKLRAAQKQKERSLSIIFCVVSVFLICWLPPFVCYLVVTLCESCWVPPPLFMFVEWM  
GYGNSALNPVIYALFNKEFRDGVKMLFRRNNYSIPLANT

### >Cin-adra2

SSILYSEEQVVI FSA L T S I L C I I G L F G N L T V I V V I R R D R V I Y K H R Q N L Y L L S L A V A D V S L V V L V V  
PFSITNELLGYWPFGTVYCRIYLSVDILLCTASIWNICMIGLDRIYSVKYPMTYRKFRTMPKIRL  
FIVSIWLFAAVVSLPPFVSEIETINSERGCFINASSWYIVVSCSLSFPIPCIIWVPYIRIYMIG  
NHIQMMLIRSDPKQDSTSKFETKVRRLSRTSRLENLMTLLVVPNSTNNSRSVTSATTDQRQM  
NRSQSFTECLNSGREDGNLLSSVAYDVTSQKSTRSDIYYISRSSSQSQSSCTTAMSRERRRVC  
IISIITGCFMACWMPFFLT YMIYAVCRACCINNTLFKVFVWLGYLNSALNPVLYTAFNKDFRSAF  
QRLFHLSGRRTIC

### >Lec-adra2

MQNMSDPAAARSTLLSPYAAFNFTLAEPENVTTGGTNSLNGTDEKLGWEYSVLAGLGLSSLVLILV  
FATVFGNCLVIIAVLTRPSLKAPQNLFLVSLATADILVATLVIPFSLFNELMGYWYFGRVWCEIY  
LALDVLFCTSSIVHLCAISLDRYWSVSQAVEYNIKRTPRMKRIIVIVWFIAIAISLPLISMNQ  
KNRQQQEELGRPNCELNTNTWYILGSCIGSFFAPCLIMVLVYARIYHLVKWRAAKLRDKEAPIT  
SCRPMESIRMSEVNGGGGGGGGEGNGNGEKNCNGAGNKSRRHHHPPHHQHPPSHHHPEVDVEE  
TSVSSDKNERRRDDASAGAKASRKPCSPTKDDYNPEMEILERQNKARERRKIAQARERRFTFVLS  
VMIGVFVICWFPFFFTYSLSALCSPEFCVI PETLFKFFFVWFGYCNSCLNPVIYTVFNRFRAFK  
KILCMQFNSTF\*

### >Mm-adra2a

MFRQEQLAEGSFAPMGSLQPDAGNSSWNGTEAPGGGTRATPYSLQVTLTLVCLAGLLMLFTVFG  
NVLVIIAVFTSRALKAPQNLFLVSLASADILVATLVIPFSLANEVMGYWYFGKVVCEIYLALDVL  
FCTSSIVHLCAISLDRYWSITQAIEYNLKRTPRIKAIIVTVWVISAVISFPPLISIEKKGAGGG



QQPAEPSCKINDQKQWYVISSSIGSFAPCLIMILVYVRIYQIAKRRTRVPPSRGPDACSAPPGG  
ADRRPNGLGPERGAGPTGAEAEPLPTQLNGAPGEPAPAGPRDGDALDLEESSSEHAERPPGPRR  
PDRGPRAKGTKTRASQVKPGDSLPRRGPGAAGPGASGSGHGEERGGGAKASRWGRQNRKRFV  
LAVVIGVFVVCWFPPFFFTYTLIAVGCPVPSQLFNFFWFVGYCNSLNPVIYTI FNHDFRRAFKKI  
LCRGDRKRIV

### >Rt-adra2a

NKDLGGDNMLVENIGGGIAVCKDSRARAGHGGAGSRARGLSVRGRGRGLRERLGAPELLMALT  
FGNVLVI IAVFTSRALRAPQNLFLVSLATADILVATLVI PFSLAKELMGYWFGRLLWCQVHLAID  
VLFACTASIAHLCAISLDYWSISQAIEYNLKRTPRIKGI IIVVWVIAAAI SCPLITNISTNQ  
QEPGTCHINDQVWYI ISSCIGSFAPCI IMILVYIRIYQIAKLRSRGRPGDIPNGLNQPPSPGA  
PEPGQHNGGDEQGVLAEEVDESSSEQPPCPALAPSPSPAHRQHCHPPQPQHTAPNPAKATGQVR  
CVDGRPVTS LAPRSRWKGRQNRKRFVFLAVVIGVFLCWFPPFFFTYSLTAICPKLCPVPEKLF  
KFFFWMGYCNSSVNPLIYTVFNQDFRKAFFKILCRGQRRGQKL

### >Mm-adrB1

MGAGALALGASEPCNLSSAAPLPDGAATAARLLVLASPPASLLPPASEGSAPLSQQWTAGMGLL  
ALIVLLIIVGNLVIVIAIAKTPRLQTLTNL FIMSLASADLMGLLVVPPGATIVVWGRWEYGSFF  
CELWTSVDVLCVTASIE TLCVIALDRYLAITS PFRYQSLLTRARARALVCTVWAI SALVSFLPIL  
MHWRAESDEARRCYNDPKCCDFVTNRAYAIASSVVSFYVPLCIMA FVYLRV FREAQKQVKKIDS  
CERRFLGGPARPPSPEPSPSPGPPRPADSLANGRSSKRRPSRLVALREQKALKTLGI IMGVFTLC  
WLPFFLANVVKAFHRDLVPDRLFVFFNWLG YANS AFNPI IYCRSPDFRKAQRLCCARRAACRR  
RAAHGDRPRASGCLARAGPPSPGAPSDDDDDAGTTPPARLLEPWTGCNGGT TTVDSDSLDEP  
GRQGFSSSESKV

### >Rat-adrB

MEPHGNDSDFLAPNGSRAPGHDI TQERDEAWVVGMAILMSVIVLAI VFGNVLVITAI AKFERLQ  
TVTNYFITSLACADLMGLAVVPPGASHILMKMWNFGNFWCFWTSIDVLCVTASIE TLCVIAVD  
RYVAITSPFKYQSLLTKNKARVVILMVWIVSGLTSFLPIQMHWRATHKQAIDCYAKETCCDFFT  
NQAYAIASSIVSFYVPLVVMVFVYSRVFQVAKRQLQKIDKSEGRFHAQNLSQVEQDGRSGHGLR  
SSKFCLKEHKALKTLGI IMGTFFTLCWLPFFIVNIVHVIRANLIPKEVYILLNLWLG YVNSAFNPLI  
YCRSPDFRIAFQELLCLRRSSSKTYNGYSSNSNGRTDYTG EQSAYQLGQEKENELLCEEAPGME  
GFVNCQGTVP SLSIDSQGRNCNTNDSPL

### >Alu-adrb

MSANTTVSPTQT TAILTTNSTDSPVGS CFAPNPYSAGVQAVLGFITVILILLTVGNLLVILAVT  
CHRKLRTVTNFFI ISLACADLSVGITVLPFAATNDILGYWPFGGYCDVWVSFDV LNSTASILNLC  
VIAFDRFLAITAPFTYHTRMTERTAGILIASVWGI AVVVSFLPVQAGWYRDNQSTEALAIYADPC  
LCIFAASTAYTIVSS LISFYIPLVIMLVFYGYVFKAARDQARKINALEGRIEQENNRHGKKISLA  
KEKKAAKTLGI IMGVFILCWL PFFVNI VNPFCNRCVPPAGFIALTWL GWINSCFNPI IYAFNKE  
FRKFVVKMICCYKCRGVTVGP NMADLTYDPVAMRLKKKGDNLNSSANGKANGNL DQVAGEGTSDS  
\*

### >Cin-adrb

GLSILLGSICTVTVLGNLIVIFTAILFRQLRTIPNMFIIISLASADLLMGTIVLPMWSHYVIGDFK  
WSLGFFWCDVWTSIDVLSVTASIGTLCAISLDRFVAITMPFKYATKMTRPRARFIIIGFIWMVSGT  
IAFVPI NLGWWKTNKPEDLECYDSPTCCEFRPNVIYAVVSSCISFYIPLIIMICAYSVVFKSKAI  
FTHTFIVISTTVAIQKRGVLPWEKREHRAVITMGIIMGTFFVVCWLPFFFIVNIAQVFCQCVASTPF  
LMVNCLGYTNSLNFNPIIYCRSEEFKAFKRVLMCGLC

### >Cm-adrb1

MGDGMDCNSSSSSHHHHHNNNNNRSATLVSANSANGVSPNGPEQSSSEHQWVIVMGVIMAVIVLI  
IVVGNLLVVLAIARNQRLQTLTNLFIVSLACADLVMGLLVVPPFGATLVVRGTWLYGSFFCFEFTS  
VDVLCVTASIE TL CVIAIDRYIAITSPFRYQHLLTKTRARGIVCVVWAI SALISFLPIMMHWRD  
ENPDAIVCYNDPCCCDFLTNKAYALASSIISFYLP LLIMIFVYARVFQEAKKQMQKIIKCEGRFY  
SSYFIPNGRSARRRPSKTI AIKDKALKTLGIIMGTFTLCWLPFFLVNVAKAFRSEIVDDKLF LF  
LNWLGYVNSAFNPIIYCRSPDFRKA FKRLFCPRRPGSRDLDSGGFSRCSGMFGNTLDPRNLEM  
WSDWNMALQSSSEGGQGVGMGQGMGAGDGAGDGAGDGEDGEDGEDGEGDSESPGIAVINS A  
FFFSLQRSKR D

### >Csa-adrb

MFAFKKKNLKQQLNGLAEHSTGYRKLNGRRNRKLWFYFFGLIVLIHLFAIPVHASD TTQSFTPTP  
NLTSNKFTDLRHSGITIP EYENQGLNAPLKAGLYFILSCVCIFTVIGNVMVILTATI FRKLRTIP  
NMFIIISLASADLTIGTVVLP MWSHYVIGGKWDLGAFWCDIWTSDVLSVTASIGTLCAISLDRFV  
AITMPFKYSTKMTRLRARFIIIGFIWIVSAAIAFIPINLGLWKTNEPDDQKFYDDVTNCEFKPNTV  
YAVVSSCISFYIPLIIMVCAYSIVFKIAIQKGSKIRNREGVYRRASMPGSRTLLWGKREYRAVFT  
MGIIMGTFFVICWLPFFFIANIVQVFCEGCISAPAFMMINCLGYINSFFNPIIYCHSLEFRRAFKRL  
LLCGLCRDGRYKANKFY SFLFNTLSLKMTV\*

### >Lec-adrb

MLNFQVIPHEDATPPCVVGNSSAWNDS DPATSVGVNCSSEGTGQKPAEMEMVGLGMLMSLIVLF  
IVFGNVLVITAVAKFRRLQTQTNFYVVS LACADLLMGLIIVVPPFGATPVVSGTWTWYFGPRFCSEW  
TAVDIMCVTASIDTLCVIAVDRYIAVARPLRYETLMNKRRARFIIVAVWLVSALISFLPIEMGWW  
KSEAAAAANNTAEDVCEFNISLEYAVASSVSFYLP LTVMIILYSKVFREARKQMEKINTSEGRF  
YNNANDSATIKNPARKLSRFLSRKEHRALKT LGLIMGTFTLCWLPFFVNVIVQVWNCVPTGVFV  
SLNWLG YINS AFNPIIYCRSPDFR SAFERLLCCGRLVGRRRRRRGRGRKDNNELGQCTSWPICPD  
SGSTQGYVERCSETGTTLCGASTSSQGSNSEQSLDTNGNSHGLLSAL\*

### >Rt-adrb-like

MGDRLSSEDCHTNKSSTILFVNPANGVSPHVPQQEFSEQWVIGMGTVMASIVLIIVLGNLLVVFA  
IARNQRLQTLTNV FIVSLACADLIMGLLVVPPFGATLVVRGNWLYGSVFCEIWTSDVLCVTASIE  
TLCVIAIDRYVAITSPFRYQSLTKARARAIVCVWVLISGLISLLPIMMHWRDDQPDAIRCYND  
PCCCDFVTNKAYALASSIISFYLP LLIMIFVYARVFQEAKKQMKKIDKCEGRFYTSHFIPNGRSA  
RRRPSKIIAIKDHKALKTLGIIMGTFTLCWLPFFLANVAKAFRTDIVPGKLF LFFNWLG YVNSAF  
NPIIYCKSPDFRAAFKRL LFCPGQADSNRLCSGSGEFSRCSGMFGNTLDPRSLETWSEWNRSQEA  
NGGGLDRHMGENPEDQESQF

## **Dopaminergic receptors**

### **>Pm-drd1-like**

MLMVVAMMEEKGFKAEPACAAGNEDEDDTRRVMNLNTADEALGCEPGKGLSFRI LAGCLLSLLI  
LSTLFGNTLVCAAVIKFRHLRSKVTNYFVIVSLAVSDLFVALLVMPWKAITEVAGFWPFGAFCNVW  
VAFDIMCSTASILNLCVISVDRYWAISSPFRYERKMTQRVAFVMI SVAWTLSVLISFIPVQLNWH  
KAQHVQQTWEFHNASGGADADASVPENCDSSSLNRTYAISSSLISFYIPVAIMIVTYTKIYRIAQR  
QIRRIASLERA AEHAHNCQLNPNDPCNEMSFKTSFKKETKVLKTL SVIMGVFVFCWLPFFILNCV  
VPFCD SAGVEGDDEQQQQQHPLCVSETTFSIFVWFGWANSSLNPIIYAFNADFRKAFSTLLGCN  
TLCASTPVETVNLSNEVASYPHDVTSNHKDGGANVYVQFIPHVVIVNDES DGDGDFKVP EESRSMRE  
DRSGIDHRLDCDEDVSLETITPFTPNGVHET

### **>Mm-drd1a**

MAPNTSTMDDETGLPVERDFSFRILTACFLSLLILSTLLGNTLVCAAVIRFRHLRSKVTNFFVISL  
AVSDLLVAVLVMPWKAVAEIAGFWPFGSFCNIWVAFDIMCSTASILNLCVISVDRYWAISSPFQY  
ERKMPKAAFILISVAVTLSVLISFIPVQLSWHKAKPTWPLDGNFTSLEDAEDDNC DTRLRSRTYA  
ISSSLISFYIPVAIMIVTYTSIYRIAQKQIRRI SALERA AVHAKNCQTTTGNGNPVECSQSESSF  
KMSFKRETKVLKTL SVIMGVFVCCWLPFFISNCMPFCGSEETQPF CIDSITFDVFWFGWANSS  
LNPIIYAFNADFRKAFSTLLGCYRLCPTTNAIETVSINNGAVMFSSHHEPRGSI SKDCNLVYL  
IPHAVGSSEDLKREEAGGIPKPLEKLSPALSVILDYD TDVSLEKI QPVTHSGQHST

### **>Cm-drd1**

MDGRSVTTKDKDSSFRILTACFLSLLILSTLLGNTLVCAVAVRFRHLRSKVTNFFVISLAVSDLL  
VAVLVMPWKAVSGVAGYWPFGSFCNIWVAFDIMCSTASILNLCVISVDRYWAISSPFRYERKMP  
KVAFIMIGVAVTLSVLISFIPVQLDWHKAKATSTLLDYNVSYQGQGRVDNCDSSLNRTYAISSSL  
ISFYIPVAIMLVTYTRIYRIAQKQIRRI SALERA AVHAKNCQTSCESGSLDGQQQQQQQSESSF  
KMSFKRETKVLKTL SVIMGVFVCCWLPFFILNCIVPFCEHPGRVSTK DQLPCISDTTFDIFVWFG  
WANSSLNPIIYAFNADFRKAFSTLLGCHRLCSGNAVETVTIHNGVGTGCNPEPSGQQQQQVLGNC  
VYLIPHPVSCEAGNAPDPHCCPRKLSPASLHGAVSLQSGYNTDCEADV SLEKITPITQNGQHNT

### **>Rt-drd1**

MRLNTTTTMDGSSLA AEQDSSFRVLTGCFLSLLILSTLLGNTLVCAVAVIRFRHLR TKVTNFFVISL  
AVSDLLVAVLVMPWKAVSEIAGFWPFGPFCNVWVAFDIMCSTASILNLCVISVDRYWAISSPFRY  
ERKMPKVAFVMISA AWSLSLLISFIPVQLDWHKARAPNGLHGNASSQRLGDNCDSSLNRTYAI S  
SSLISFYIPVAIMIVTYTRIYRIAQKQIRRI SALERA AVHAKNCQSNRSSASTTDIQSESSFKLS  
FKRETKVLKTL SVIMGVFVCCWLPFFILNCMPFCESHASPPPLPCVSGSTFDVFWFGWANSS  
LNPIIYAFNADFRKAFSTLLGCDTL CASNAVETVTIHNGVSSYHPGPSLDKAENSVYLIPHSVPCP  
PETPTDPNHCAKLSPI SQHGAVSLLSSNGDYETDVSLEKI IPITQNGQHNT\*

### **>Alu-drd1,5**

MAAANNSTNSTDMVQVWDDLDGLDLLRVVGIGGILYLIVLMTILGNLIVLTAVMKYPHLRTKVTN  
YFICSLAVSDLMVGFLVLPWAAAQELLGYWPFQFCSTFVSLDVMCCTASILNLCVISVDRYWAI  
SDPFKYERDMTCCRAALMIGLAWCLSAMISFIPIGLGFHHIGETITVTQRQCESNMNQVYAITSS  
FVSFYIPVIIMVMAYSKIMQIARRKYEDIVALHRSVNQNTKSVQESRTALRRETRIFKTLACILG

VFIVCWLPPFFILNCLVPFCPLKTGGKANFTCVSDTVFTVFEWLGWVNSTLNPVIYAFNNDFRKAF  
WRMLCRRVFPFSRTEAAATSCPCCPAEAYEMAEYKTSNRSPKSV\*

### >Bfi-drd1,5

MTMVAVNNSTNSSDMFQGWEDLDGVDLLRVVGVGGTLYLIVLLTILGNLMVLTAVMKYPHLRSKV  
TNYFICSLAVSDLMVGFLVLPWAAAQELLGYWPFQFCSTFVSLDVMCCTASILNLCVISVDRYW  
AISDPFKYERDMTCCRAAIMIGLAWCLSAMISLIPIGLGFHHIGETITVTQRQCESNMNEIYAIT  
SSFVSFYIPVIIMVLAYSIMQIARRKYEDIAALHRSVNQNTKSVQESRTALRRETRIFKTLACI  
LGVFIVCWLPPFFILNCLLPFCPLRTGGKANFTCIDHTVFTVFEWLGWANSMLNPIIYAFNNDFRK  
AFWRMLCRRVAYRGS DTA VNFPCCPADTYEMAEYRTSNRAPRSV\*

### >Mm-drd2

MDPLNLSWYDDDLERQNSRPFNGSEGKPDPRPHYNYAMLLTLLIFIVFGNVLVCMASREKAL  
QTTTNYLIVSLAVADLLVATLVMPWVVYLEVVGWKFSTRHCDIFVTLDVMCTASILNLCALSI  
DRYTAVAMPMLYNTRYSSKRRVTVMIIVVWLSFTISCPLLFGLNNTDQNECIANPAFVVYSSI  
VSFYVFFIVTLLVYIKIYIVLRKRRKRVNTRKSSRAFRANLKTPLKGNCTHPEDMKLCTVIMKSN  
GSFPVNRRRMDAARRAQELEMESLSTSPPERTRYSPIPPSHHQTLTPDPSHHGLHSNPDSPAKP  
EKNGHAKIVNPRIAKFFEIQTMPNGKTRTSLKTSRRLKLSQQKEKKATQMLAIVLGVFIIICWLPF  
FITHILNIHDCNIPVLYSAFTWLGYN SAVNPIIYTTFNIEFRKAFMKILHC

### >Dr-drd2

MEVFTAYAFNESFFENASRDFNATEQGGRHQYNYAMLLTLLIFVIVFGNVLVCMASREKALQT  
TTNYLIVSLAVADLLVATLVMPWVVYLEVVGWRFSTIHCDFVTLDVMCTASILNLCALSIDR  
YTAVAMPMLYNTRYSSKRRVTVMISVWVILSFAISCPLLFGLNNTVTHDDALCVIANPAFVVYSS  
IVSFYVFFIITLLVYVQIYVVLRRKRRKRVNTRKTCPVTDMDMSSTIKKCTHPDDVKLCTVIVKSS  
GNCPVNNKNVIFIKVNVNNGDDIQMDEITNRNPSRQRKQDQSGGSQQNSRLVNSNLRETDISP  
PEAGVKPERNGNTSSITKGAKAFEIQVSP TGKTQTSVKTLNKRKISQQKEKKATQMLAIVLGVFII  
ICWLPFFITHIVNTYCQVPELYTAFTWLGYN SAVNPIIYTTFNIEFRKAFIKILHC

### >Dr-drd3

MGFCFGSSLEKLNRSSTLMAMFSSGEWLWNDSEHSFTPGGNYS PASGV EEA KRNYAMLYSL LIL  
AIVFGNVLVCI AVL RERALQTTTNYLVVSLAVADLLVASLVMPWAVYLEVVGAWLFSRLYCNV  
VTLDVMCTASILNLCALSIDRYTAVVMPVLYNTHSSRKRVSVMIA TVVWLAF AVSCPLLFGFN  
TTDDPAVCSISNPDFVIYSSVVSFYLPFAVTLVYVRIYIFLRRRRKKITFRQSGSKVQPASAPP  
SVEMCLODDAHKEKRDLSPIRIN VITESKEQVIRPRLLANCLRRKRPQTAPAENSLLPVITLNY  
CSISQAS FARTEQDANREEEEGGDEEQVAVRSCEVKKLANGRTH TSLRPPRAAHAMVCP SQARCR  
SMHSKEKKATQMLAIVLGVFLICWLPFFVTHILNTHCRACHIPPEVYSAFTWLGYN SALNPVIY  
TTFNIEFRRAFIKILSC

### >Mm-drd3

MAPLSQISSHINSTCGAENSTGVNRARPHAYYALSICALILAIIFGNGLVCAAVLRERALQTTT  
YL VVSLAVADLLVATLVMPWVVYLEVTGGVWNFSRICCDV FVTLDVMCTASILNLCALSIDRYT  
AVVMPVHYQHGTGQSSCRRVALMITAVVWLAF AVSCPLLFGFN TTGDPSICSI SNPDFVIYSSV  
SFYVPGVTVLVYARIYMVLRQRKRILTRQNSQCISIRPGFPQQSSCLRLHP IRQFSIRARFL  
SDATGQMEHIEDKPY PQKCQDPLL SHLQPLSPGQTHGELKRYYSICQDTALRHPNFEGGGGMSQV

ERTRNSLSPTMAPKLSLEVRKLSNGRLSTSLKLGPLQPRGVPLREKKATQMVVIVLGAFFIVCWLP  
FFLTHVLNTHCQACHVSPELYRATTWLGYNVNSALNPVIYTTFNIEFRKAFLKILSC

#### >Mm-drd4

MGNSSATEDGGLLAGRGPESLGTGAGLGGAGAAALVGGVLLIIGLVLAGNSLVCVSVASERTLQTP  
TNYFIVSLAAADLLLAVLVLPLFVYSEVQGGVWLLSPRLCDTLMAMDVMLCTASIFNLCAISVDR  
FVAVTVPLRYNQGGQCQLLLIAATWLLSAAVASPVVCGLNDVPGRDPVCCLENRDYVVYSSVCS  
FFLPCPLMLLLYWATFRGLRRWEAARHTKLHSRAPRRPSGPGPPVSDPTQGPFFPDCPPPLPSLR  
TSPSDSSRPESELSQRPCSPGCLLADAALPQPPEPSSRRRRGAKITGRERKAMRVLPVVVGAFLV  
CWTPFFVWHITRALCPACFVSPRLVSAVTWLGYNVNSALNPIIYTI FNAEFRSVFRKTLRLRC

#### >Dr-drd4a

MPANLTIISTHTTNYNFPALIFGILLIIIIICGNVLVCLSVYTEKALKTTTNYFIVSLAVADLLLA  
VLVLPLFVYAEFQDGVWSLNMTVCDGLMTMDVMLCTASIFNLCAISIDRFIAVSIPLNYNRKHVD  
QRQIVLLSATWILALAVASPVVFGINNVPNRDHSECKLEDNNYVIYSSVCSFFVPCPIMLLLYCG  
MFRGLRNWEEARKAKLRNMEACRKLQEAASLQPLSGLPPPLPPVIEKDITLEELDQDHYDPDP  
SPDPVSMLAYPGGGYNQDQNRQRKRAKINGRERKAMRVLPVVVGAFLFCWTPFFVWHITRALC  
EDCEIPGSVTSIVTWLGYNVNSALNPIIYTVFNTEFRKFFRKFLPTLPGCC

#### >Bfl-drd4

MLCTASIFNLVAISIDRFYAVTWPVRYSKHKSNTRLAITITLVWTLVSVICAPLLFGSNYPKAGE  
RTPEMCGIFNNNYMIYSSMCSFFI PCTAMLVLYYKILKKIKERSKKMAKKMPKSTSAGMICGDTV  
IANTTTSSGIALKENGASKKTLSTPVLGDHAGHAVSAVDANSRPSSECAKLPKTRLDAIKIKLKG  
KVKDEFPNKREQKAINVMKIVIGVFLICWTPFFVTNVVRACSTCTIPDVLFSIVTWLGYLNSGMN  
PIIYTI FNFQEFRSAFRKLLCKTH

#### >Mm-drd5

MLPPGRNGTAHRARLGLQRQLAQVDAPGGSAAPLGPVAVTAGLLTLLIIVWTLGNVLCVAAIVR  
SRHLRAKMTNIFIVSLAVSDFVALLVMPWKAVA EVAGYWPFGAFCDIWWAFDIMCSTASILNLC  
IISVDRYWAI SRPFYERKMTQRVALVMVALAWTLSILISFIPVQLNWHDRKAGSQQREGLLSNE  
TPWEEGWELDGRTECDSSLNRTYAISSSLISFYIPVAIMIVTYTRIYRIAQVQIRRISSLERAA  
EHAQSCRSRGACEPDPSLRASIKKETKVFKTL SVIMGVFVCCWLPFFILNCMVVFCSSGDAQGPR  
TGFPVSETTFDIFVWFGWANS LNPIIYAFNADFRKVFQAQLLGC SHLCFRTPVQTVNISNELIS  
YNQDTVFHREIAAAAYVHMI PNAVSSGDREVGEEEEEAE EGGPFDHMSQISPTTPDGD LAAESVWEL  
DCEEEVSLGKISPLTPNCFHKTA

#### >Rt-drd5

MRNGSLWKEPGGDKVLAGRVLTGALLSALILFTLLGNALVCVAVLRYHNLRAKVTNLFIVSLALS  
DLLLAVLVMPWKAAAEVASGWPFPGFCKVWLA FDIMCSTASILNLCVISVDRYWAIASPFYER  
MSRRLALLVGLTWALAVLVSFVPVQLDWH TAPAARSSSAPRPPPRGQRPPANCSSLN RAYAIS  
SSLISFYIPVAIMLVTYDRIYRIARVQIRRI AALERAAQHARSCRQEQRSLRSSFYKETKVLKT  
LSVIMGVFVCCWLPFFVLNCLVPFCDRRSPSPCVSETTFDVFWFGWANSALNPVYAFNAEFR  
QAFSGLLGCTRVCCAPTAGRHSANISNELVSYHQETALQRE VACADMI PNAVQRAPAAFDSMSQ  
ISAAADEDEDEEPPASDSAAELGLTFCKITPFTPNGVH\*

### >Le-drd5

MDGAPGVKSELATRILTGLLLSLLILFTLLGNALVCVAVVHFRHLRSKVTNVFIVSLALSDDLVA  
VLVMPWKAVAEVAAYWPFGRRFCSVWVASDIMCSTASILNLCVISVDRYWAISSPFRYQRKMTHR  
AALVMIAVAWAFSLLISFIPVQLSWHSIREPAGAGHSNNSAFAHPPESCDSSLNRTYAISSSL  
VSFYIPVAIMLVTYTRIYRIARIQIRRIASLERAAEHAQSCRRLRLEPRQQQQPMHHHSALERSF  
KKETKVLKTLISIMGVFCWLPFFVLNLCMVPFCDRSSPAAAARLPCVSDTTFDIFVWFGWANST  
LNPVYAFNAEFRKAFSSLLGCQDFCSGNQVETVNI SNELVSYNQDQTVFHREIVTAYVTMI PNVM  
GCMEDDQIFDRMSQILATNEQATETASEMEGDADLSLGTKITPCTPNGLH\*

## ***Histaminergic receptors***

### >Mm-hrh1

MSLPNTSSASEDKMCEGNRTAMASQQLPLVVVLSISLVTVGLNLLVLYAVRSEKRLHTVGNLY  
IVSLSVADLIVGAVVMPMNILYLIMTKWSLGRPLCLFWLSMDYVASTASIFS VFILCIDRYRSVQ  
QPLRYLRRTKTRASATILGAWFLSFLWVPIPI LGWHHFTPLAPELREDKCETDFYNVTWFKIMTA  
IINFYLP TLLMLWFYVKIYKAVRRHCQHRQLTNGSLPTFLEIKLRSEDAKEGAKKPGKESPWGVQ  
KRPSRDPTGGLDQKSTSEDPKVTSP TVFSQEGERETVTRPCFRLDVMQTQPVPEGDARGSKANDQ  
TLSQPKMDEQSLSTCRRISETSEDQTLVDRQSFSRTTDS DTSIEPGLGKVKARSRSNSGLDYIKV  
TWKRLRSHSRQYVSGHLNRRERKAAKQLGCIMAAFILCWI PYFIFFMVIAFCNSCCSEPVHMFTI  
WLGYNSTLNPLIYPLCNENFKKTFKKILHIRS

### >Dr-hrh1

MCFLTTLTSCDTLERPMESTTTTLTTANSQFKRIDNTTLLIP SAPLHHHINNAVLGIFLGMLSLLT  
VIMNLLVLFVAVRKERTLHTVGNLYIVSLSIADLIVGATVMPLNLVYLLEDQWKLGHVVCQFWLVM  
DYVASTASIFS LFILCLDRYRSVRHPLQYLKYRTRGRATLLICSAWLLSMTWTIPI LGWRMFASV  
DKKTELENQC DTD FRFVTWFKVLTAILNFYIP SFLMLVFYSQIFIAVRDHYREWENFAGPALKTD  
ATD TLTNGLQLQITKASEKESLALNAYSQNEGLLDQYSLEQPYNSRENT EEMISEPKRKM CYKKK  
AIFNLSKRMRKSVDPSEISFQSDDGETVAEGRPSLSLAF LQSENTAQPQTFINVSDCNVLPNSV  
GNICESTPTVDIHNYTAVLCTPPSPSPWAENSPPLDASIALPAKQSWQKLCEQSKQS IHSMRIR  
KERKAARQLGFIIGVFMVCWIPYFITFMVMALCETCVHHDLMFTI WLGYNSTLNPF IYPLCNE  
NFKRVFKKIFHMSR

### >Dr-hrh2b

MTIRALCWVVLVAFIAL TICGNILVCM AVATSRRLHQ LSSCFILSLAVTDLLLGLLVLP LSAMLE  
LRNGKWPLGGVFCNIYISMDVMLSSASILTLLAISVDRYLAINPLFYPRRVTPRRVAIALTAIW  
TCSLAVS FVSINLGWNSP DFRVQNL DWSMWDEGE EGRTCRYEWNNNYVLLKAFGIFYLPLLVMCG  
MYHRIFCVAREQVRRIRAATPSSAQVANAAATAREHKATVTLAAVLGAFIICWF PYFTYFTYMG M  
WAHPNKLTHSIVLWLG YLNSALNPILYPALNRDFRQACGQLLCRCGKRGDFNTSRRKTFIALGT  
IKVIKGLAH

### >Rat-hrh2

MEPNGTVHSCCLDSMALKVTISVVLTTLILIT IAGNVVCLAVSLNRRRLRSLTNC FIVSLAATDL  
LLGLLVLPFS AIYQLSFTWSFGHVFCNIY TSLDVMLCTASILNLFMISLDRYCAVTDPLRYPVLV

TPVRVAISLVFIWVISITLSFLSIHLGWNSRNGTRGGNDTFKCKVQVNEVYGLVDGLVTFYLP  
IMCVTYRIFKIAREQAKRINHISSWKAATIREHKATVTLAAVMGAFIICWFPYFTAFVYRGLRG  
DDAINEAVEGIVLWLGYANSALNPILYAALNRDFRTAYQQLFHCKFASHNSHKTSRLNNSLLPR  
SQSREGRWQEEKPLKLQVWSGTELTHPQGNPIR

### >Dr-hrh2

MTSQIALAVTSLVLIILLTVSGNILVCLAVYATRRLRNVTNCFIVSLAVTDFLLGALVLPFSTLYQ  
VTGDWPLGAHFCNIYISLDVMLCTASILNLFALISLDRYFAVTAPLRYPMLVLPWRVGA  
LATIWL  
VSVGVSFVPIHLGWNTDLSVQNIREGDHARDCRFELNPTYAIVDAFSTFYLP  
LLAMCWSYHRVF  
RIARMRAKRIISTRGSTSSQGVITLTLREHKATVTLAVVLGAFVVCWFYFTFF  
TIMGIRNEEN  
PPQTAQSVVLWLGYANSALNPVLYATLNRDFRSAYAKLLCGGRRCKTET  
TPIAATAAGTMTGHA  
HSSKGAGFLPRTC  
VLLKDS  
ENRMLDDNSATNGATVTVVANGSKR

### >Le-hrh2

MENGQNIITSECESRSVLSTVLVGLVMGITLITIFGNVLVCLVGLNRK  
LQSH  
TNSLIVSLAATD  
LLLGLLVMPFSTTLQLLNSEWPF  
GPTFCNIYTSMDVMLSTASILNLFALISLERYLAVTAPLRYNI  
VITPNRVIVSLVFIWCISIMFSFLPINLGNWNSKDAL  
TQSSNETNQCHLEMNPSYAI  
VDAFITFYI  
PLAIMCLTYIKIFKIAREQAKRISSATRSTLPGLKEHKATVTLATVMGVFIICWFPYFTVFLHAG  
ISGIQSDKTVFAVVLWLGYN  
SALNP  
IVYAALNREFRMAYQKLLFCRKR  
NACNRGSSINYQVGR  
L  
RNEQCHQLVRILDDNEPSSDNTITK  
DICLCTEDSER\*

### >Rt-hrh2

MEVEGSQNATTSS  
ENRTVLSTVLIGLVGVIVII  
TIFGNVLVCL  
AVGLNRK  
LQNH  
TNCFIVSLAATD  
LLLGLLVLPFSAISELFEWPF  
GDTFCNIYTSLDVMLCTASIL  
NLFMISLD  
RYAVTAPLRYAVFITRNRVVISLGLIWCISIMVSFLPINLGNWTKDLSVQSLANTN  
QCHLELNK  
VYALIDAFITFYIPLPIMCLTYRIFKIAREQAKRINTVTGCTALNRSLPTVKEHKA  
TVTLAIVMGVFIICWFPYFTVFTHEGISGRQANKTVFAVVLWLGYN  
SALNP  
ILYATLNRDFRKA  
YEKLLCCKKRNSYHKDPPDKPLSCRPLHNGDPRNERCHQLGPDMEENELTSEDRNGENVATYKED  
SERSLDGIVHSREVFLEGETNTPQ

### >Alu-hrh2

MCLLPHPDRAAGGSMDNLSTTTVTDNATLLPETTRAPYGGKTLFAAVVLGTVLGLITLGTVVGNV  
LVCLA  
AVVNRRLRNITNYFVVS  
LAVADLLVGVVLPFSTIFEVTRYWNFGLILCNM  
WVSTDVLCCTASILNLFALISLD  
RYAITRPFTYSNKMCRRKAFMAIAIVWTVSLLVSFLPIWVGWNTQDGRLQN  
IDDP  
TKCNFDNTNVPYIMIVAFGTYYIPLIIMCVTYFRIFLIAKEQASRINALQPEVRDANRRQN  
QNLANEHKATR  
TLAAVLGAFIICWTPYFTVFTITPLCGCTIPHQLYSVVLWLGYN  
SLINPCVYA  
FMNKEFRRAFKLLCFQTNSICFFSNPRNRRLDTPPTSTAHRN\*

### >Bfl-hrh2

MENVSAVTDNATLLPGGGVDARAPYGGKTLFAAVLVGTFLGIITLGTIIGNVLVCLA  
AVVNRRL  
RNITNYFVVS  
LAVADLLVGVVLPFSTIFEVTRYWNFGLIMCNLWVSLDVLCCCTASILNLFALISL  
DRYYAITRPFTYSNKMC  
RQKAFMAIAVVWIVSLLVSFLPIWVGWNTQDGRLQN  
VDDPTQCSFNNT  
NVPYIMIVAFGTYYIPLIIMCVTYFRIFLIAKEQANRINALQPEVRDANRRQN  
QNLANEHKATR  
TLAAVLGAFIICWTPYFTVFTITPLCGCTIPEQLYSVVLWLGYN  
SLLNPCVYAFMNKEFRRAFK  
LLCFQTGNTVCFCGNPRNWAQDEPTTSTAPRQS\*

### >Dr-hrh3

MQSSLLSVAHSPGIPTAVSLMWKSGNHQSSNWSGEMERENATSLADLDTFENRRAQYQGQFSPSTSI  
FLTVMNTLLVFATVLGNALVILAFVVEKSLRTQGNFFFLNLAIADFLVGGFCIPVYIPYVLTGEW  
RLGRGLCKLWLVVDYMLCTASVFNIVLISFDRFQSVTKAVSYRCQKGITKDAVLKMLCVWLAFL  
LYGPAAIISWEHITGGSVVPDGECEYAEFYFNWYFLMTASTVEFFTPFISVTFNLSIYINIRNRCA  
MREEQPTYVRLRSFKMKPLGAGDVQRVFFVVRPVEESRVADLASRSRCCRLASTAKVSAAEFGNGR  
QSKRRDSTLADLPPLQVEERILAASEAQFHVVDHSAGPHRHRPDMVASLANRFRLSRDKKVAKSL  
AVIVCVFGLCWAPYTLLMIIRAACHGQCVQHLYEISFWLLWINSSINPILYPLCHSSFKRAFSK  
LLCPSKTKIQPNIDQKY

### >Rt-hrh3

MAKLGTLRAIAWTAPLLCASLGAEVNSSQRSLPNLAQSTGCLPFHQFSATSAGLLITLMVLLVII  
TVLASVIPAFVVDKSLRSQNNFFLYFLVGAFICPLYVPXALASRWMLGKTLCKFXLVMNYLLCTS  
SVFNTVLIISYVRFDCVARPFSYQAQQWKRRAAIKIMLVRLTAFLLYGPAITAWEXVIGRNIVLV  
GECYAEFYNNWYFLITASTVEFFVFPFISVMYFNLSIYLNLQQRTRSQSNSFWNTKSKSSLEHLEA  
GSNLACSLKICKSDQKTKLIKSTVCDLTTMSSEIKIKVERSETLDHLKRRNDLGRITPSSEVKCL  
MKEEISQSOLFSSKRKIKLISQNVVQHFRLLRDKRTAKSLAVIVCVFGICWAPYTLLLVRAGCQG  
HYMAYDWYEASFWFLWINSAINPILYPLCHKNFKRAFMKLLCPTKLMRPRSSRQ

### >Dr-hrh4

MKTLSSSAAGKASHDDFRPVAASPNVLDLTMVTCFNNTSGSNGTTVSPAEPFPGYTMVILAILM  
ATLVVVVVVGNALVILAFVVDKSLRNQCNYFFLNLAISDFLVGAFICPLYMPYILTGRWMLGRGL  
CKLWLVMDYLLCTASVFNIVLISYDRFLSVTRAVRYRAQQGVTRLAVLKMLAVVWSAFLLYGPAI  
IFWELLVGESIVPEDECFAEFYCTWYFLLSASTFEFFSPFISVAFFNFSIYLNIQRRNRSRMAHV  
EAEKEDGWRVIDGQTSSVFFVKTRKVSSEPAAVSAVIEDDEEVSPSSSGDPSSTHSVSLTMKTT  
IKKRGLFGGWVRTRIIIRAQEVNTPCAPCRSGGHARLSRDKKIAKSLAVIVCVFGVCWAPYTLLMI  
IRAACSGSCVEHHWYEVTFWLLWLNAINPFLYPLCHSSFRRRAFAKILCPCRQSVQPHEESPSCP

## ***Muscarinic acetylcholine receptors***

### >Mm-chrm1

MNTSVPPAVSPNITVLAPGKGPWQVAFIGITTTGLLSLATVTGNLLVLISFKVNTELKTVNNYFLL  
SLACADLIIGTFSMNLYTTYLLMGHWALGTLACDLWLALDYVASNASVMNLLLISFDRYFSVTRP  
LSYRAKRTPRRAALMIGLAWLVSFVLWAPAILFWQYLVGERTVLAGQCYIQFLSQPIITFGTAMA  
AFYLPVTVMCTLYWRIYRETERARELAALQGSETPGKGGSSSSSERSQPGAEGSPESPGRCC  
RCCRAPRLLQAYSWKEEEEEDEGSMESLTSSEGEPPGSEVVIKMPMVDPEAQAPTKQPPKSSPNT  
VKRPTKKGRDRGGKGQKPRGKEQLAKRKTFSLVKEKKAARTLSAILLAFILTWTPYNIMVLVSTF  
CKDCVPETLWELGYWLCYVNSTVNPMCYALCNKAFRDTFRLLLLCRWDKRRWRKIPKRPGSVHRT  
PSRQC

### >Dr-chrm2a

MDTINFTFWNASDGNETMETADESPYKTVEVVFIVLVAGSLSLVTVIGNILVMLSIVNRSRSLQTV  
NNYFLFSLACADLIIGLCSMNLYTVYIVIGYWPLGPVVCDLWLALDYVVSNASVMNLLIISFDRY



FCVTKPLSYPVKRTTKMAGMMIAAAWVLSFILWAPAILFWQFIVGGRTVPEKECYIQFFSNAAVT  
FGTAIAAFYLPVIIMMVLWQVSRASKSRVKKDNRKPSGGNLDVASSNQIRENSANKPTNNNLTA  
EETDRGQTQLTDDTINQHDAKLQNGKAPSTASGEAEEAGQANCIPAEKESSNDSTSGSGAVTNQ  
KEEAAPPSSAAANDSQTSTRHRAKAGGSKLTCIKIITKSPKGDCYAPSNATVEIVPAVERQNHVA  
RKIVKMTKQPPKKKKAPSSREKKVTRTMAILVAFVATWTPYNVMVLINTFCSSCIPNTVWTIGY  
WLCYINSTINPACYALCNITFKKTFKQLLLCQYKNIRSTR

### >Dr-chrm3b

MNLTLSAEPGLFLTNSPPGMRANPVTAFMSHDLHPANDSLHNITQIPSVLSDPLGGHSLVQVMI  
ALLCGSISLLTIIGNTLVLLSFKLNKQLKTVNNYLLSLAFADLIIGVLSMNLTYTTYIIMDQWAL  
GNFACDLWLAIIDYVNASVMNLLVISFDYFVSVTRPLTYRAKRTTKRAMTMIGLAWSISFILWA  
PAILFWQYFVGERTEPDKCYIQFISEPITTFCTAIAAFYLPVTIMTVLYWRIYKETENRSRELA  
GLKASGNVEEESVVVVPQTGSSSRSHSSYELQPAAPMRKTKTRRLWFWSRGDVERSSSSDSWNNNET  
AISIDQSDDEEEDAHEIYTIIEKQDLEAKPSKFGVSKSSTLDSKDQPVKSARKTNKRKLSLVKE  
KKAQTLSAILLAFIITWTPYNIMVLLNAFCDCGCIPELWALGYWLCYVNSTVNPACYALCNKAF  
RTTFRSILLCQWRKKLNKAQIQKRAPAATYRKHTQSLD

### >Bbe-chrm

MAFPTIPPPGPDYTTLLYGTEVVPVVDVAVNGTPVWSTSGTFNISCNESTTLPAECNVTTAPPL  
DPLGGHQVWEVVLICLLTCSLSIMTVGGNILLVFSFRVNRQLHTVNNYFLLSLAVADTLIGLLSM  
NLYTVYVMVMGRWALGPAICDLYLTVDYVSSNASVMNLCVISFDYFVSITRPLTYRAKRTPKRAAW  
LIALAWVTSVLVWAPLIVGWQYIVGGRNVPENECYIHPEQPAKPLPSAAALAASRPKLSAAQLWK  
RAAENTTRTKLKSDRARKISMVLKEKKAAMLSAILLAFIITWLPYSVTVLFKPFYKVPPTVWNV  
GYWLCYVNSTINPWCYALCNRTFRKTFKDIIVCRVKKQNFRLQSKRLY\*

### >Cin-chrm1-5

LLICILAGACSLLTIVGNVVIVSFFINKSLRNFSNYLILSLAISDLTIGAFSMNVYTSYNVKNE  
WILGEVMCKAWLAVDYTASNASVMNLLVICVDRYLAITKPVKYRWCTPQRAAIAIAGVWILSFL  
MWCPAIVLWDLFSTDTKMPNTDCYIPFMKDNAWTVATIVGAFYIPATAMCALYYQVISKLRKR  
LKCIFYREPQRVVRERRVTVLLKFILTCFIVLWLPYSLIILVTSFWPSCMVPIYIWNLSYWLCYLN  
STVNPFCYGFENFRQTFKVIIT

### >Csa-chrm

VTICFLSALASILTIGGNMVIIVSFVINRALRTVNNYLILSLAAADLVIGVSMNLFVIVSGS  
WKLGAFLCDVWLALDYVNASVMNLLIICLDRYYSVTKPVEYRNQRTPKRFITAIIGAWSISFI  
LWAPWVLFWQFIVNKRTVPENASQTGADSPRSRTNSGRLLFIRRQIKKAPDSDNLDGGI IKVT  
ERLKLQVVKKLLQSLNKETKAARLLASILAAFILLWLPYNIMALVEAFCPLAEKCIPLAWNFGY  
WFCYLNSTLNPVCYAMCNKFNQQTFFKFLS

### >Csa-chrm1-5

AISIMAVILMVVTVTGNFLVIASYSNRNLRTINNMFLVSLACSDLVIGVSMNTLYPIYMISRKW  
MLGPILCDIWLCDIDYTLMSVANLMLICLDRYFSVTRPFTYRDSRTRYKTRVFILMAWVFSMLL  
WSPAIVIWPIVRGRTPVDDQCQIQFFEDATITLVTAIILAFYLPVLMVTVLYALIYRETRKCSQYL  
EYLRNYGKSRNTSSPKAARTLSAILLAFIVTWLPYNVCAVYKSFCEECVPSAAWDAAYLYCY  
INSTVNPFCFALCNKTFRETFFVLLCGRKRGLDDLPRSKRKCKSMKLQPSTS

### >Mm-chrm4

MANFTPVNGSSANQSVRLVTTAHHNHLETVEMVFIATVTGSLSLVTVVGNILVMLS IKVNRQLQTV  
NNYFLFSLACADLIIGAFSMNLYTLYI IKGYWPLGAVVCDLWLALDYVVSNASVMNLLIISFDRY  
FCVTKPLTYPARRTTKMAGLMIAAAWVLSFVLWAPAILFWQFVVGKRTVPDNQCFIQFLSNPAVT  
FGTAIAAFYLPVVIMTVLYIHISLASRSRVHKHRPEGPKKAKTLAFLKSPLMKPSIKKPPPGG  
ASREELRNGKLEEAPPPALPPPPRPVADKDTSNESSSGSATQNTKERPPTELSTTEAATTPALPA  
PTLQPRTLNPASKWSKIQIVTKQTGSECVTAEIIVPATPAGMRPAANVARKFAS IARNQVRKKRQ  
MAARERKVTRTI FAILLAFILTWTPYNMVLVNTFCQSCIPERVWSIGYWLCYVNSTINPACYAL  
CNATFKKTRHLLLCQYRNIGTAR

### >Rt-chrm

MIPDYNSTASPPFFNSSFSWNHDSQTQVVLGSRPVDRSANGLFERSAVLSPTTSLGANGSLLSNST  
TDPLGGHTVWQVVLIAFFTGILSLVTIIGNILVIVAFKVNKQLKTVNNYFLLSLAFADVIIGVIS  
MNLYTTYIIMDRWALGNVACDLWLAIIDYVASNASVMNLLVISFDRYLSITRPLTYRAKRTPKRAG  
IMIGLAWIVSFVLWAPAILFWQYFVGERTVPPNECFIQFLSEPIITFGTAIAAFYLPVTIMTILY  
WRIYKETEKRTELALQASTTDMETIHFVHQTGSSRSCSSNELQQAGMKEQRRRLRRCRFWANSK  
TWKSSTEGEQEGSSSDSWNNNDGGGSLDHSASSDEDDVSETRAIYSIVLNLPLGKTAASLSRST  
NANNIDLCSDELAKADNSVKERKFRSQEFKDPDEQGN SFHQHFALPVQSLPSIHPSKTSGGIAS  
LAKSSTSMSLRETTVAKAFASKARTQITKRKRMSLVKEKKAQTLSAILLAFIITWTPYNIMVLV  
NTFCDKCIRD SLWQLGYWLCYVNSTVNPMCYALCNKTFRNTFKMLLLCHF EKRRKRQYQPKQA  
VIFHKRIPCEPS\*

### >Pm-chrm

MEGINIQDEGIVWSPTSQNPSAPLTLNSSAADDPLAGEQNV AQVVVIAVVAAMFSLITVVGNTLV  
MLSFRVSRQLKTVSNYFLLSLAAADLIVGLFSMNLYTAYILTGRWAMGAVMCDLWLTLDYVASNA  
SVMNLLAISFDRYFSITRPLKYKAKRTKRRASIMIGLAWAVSLVLWAPAILFWQH MVGKRTVPQD  
QCYIQFLSEPIITFGTAIAAFYLPITIMMVLYWRIYRETRRRSRQFATLQGSSEKSRSHVPTGTR  
GCLTFLKDDDCDDDDYDEDCGARAHDGIRSPKSKTSQGSQPWKCSLQSC EGHVETTHEEEEDDDEE  
EEEEAVSLGCAISSDDDEQEPANERADSCAKPAAAATDGSSPRPSAPSDVPDDPVA AADS VVGN  
GETCAEPQHARISSTVRGRDLGRNNCVTLADMRIEESLLPRDAERESPRED EPAADKIVLRGRSH  
RGRCKGGKAHSSTARRHCSLLARDNKAVRILCAILLAFIVTWTPYNIMVLVSTFCDDCVPKLWH  
LGYWLCYVNSTVNPMCYALCNMHFRKTFKTI LSCKWNAVT\*

## **Serotonergic receptors**

### >Pm-htr1A

AAVTAMEAHNITGSAPALAVSAAQGNSSSEPSSVAYTVISSLCLTALILCAIFGNSCVIAAIALER  
TLQNVANYLIGSLAVTDLLVSI LVLPM AALYQVLD RWT LGQVVC DIFIALDVLCCTSSILHL CVI  
ALDRYWAITNPIDYVNKRTPRRAVIMISLTWLVGFSISIP PMLGWRTPE DRADPNACKISQDHGY  
TIYSTFGAFYIPLILMLVLYSRIFRAARFRIRKNVKKATEKKSFDAPFAISNRAEMPSAAAE AET  
AAPPSPAPCNGDSKQRSHRDLALPEAVGARSPSSLAHSSARPHLS PAMMPTQQQHQHNGTGADAC  
RRKTALLISPFGERCHLPPGVFAVINWLGYSNSLLNPIIYAYFNKDFQNAFKKI IKCKFCRQ

>Dr-htr1a

MESYNNTTESQDWSGNATSVSEVALSYQIIGSLFLAALILFAILGNACVIAAIALERSLQNVANY  
LIGSLAVTDLMVSVLVLPMALYQVLNKWTLGQEMCDIFISLDVLCCTSSILHLCAIALDRYWAI  
TDPIDYVNRKTRPRAAILISLTWLGIFSISIPPLMLGWRKPEDRADPDACTISQDHGYTIYSTFGA  
FYIPLILMLVLYGRIFRAARFRIRKTVKKTEKAKIADKCLAVSPALFPRKANGEVGTWRRSVEP  
CANGALKNSDDGESFEITEVQSI SKNHLSLPNNPQPCFENRNEKNTEAKRKVALARERKTVKTLG  
IIMGTFI FCWLPFFIVALVLPFCQDCFMPEWLGAVINWLGYSNSLLNPVIYAYFNKDFQNAFKKI  
LKCKCIRQ

>Dr-htr1fb

MDPINCTSVDLSDVLASKMSPSKILLSLTLSFLAVATTAINSLVITAILITRKLHQpanylicsl  
AVTDLLVAVLVMPVSIYVIAEETWVLGPIVCHLWLGVDVTCCTCSILHLAAIALDRYRAITDAVA  
YSQKRTYKRVIIVTILSLWTL SILVSLPPLVWRKFKPVEFKDGKREPMDCIEHDHVAFTVYSTFG  
AFYIPLALILVLYYKIYKAAEMLRNRRGSSRLVKQTVSSVMLPGMSSDKIALSPDSFCPIEKSF  
SDPSTDGERVRI TSSGNLIRVRNPGARERRAALTGLLILGAFVVCWLPFFLKEVIVNICPTCT  
TSAVLADFLTWLGYLNSLINPLIYTI FNEDFKKAFKLLPLCCSTVL

>Mm-htr1b

MEEQGIQCAPPPPAASQTGVPLTNLSHNCSADGYIYQDSIALPWKVLVALLALITLATTLSNAF  
VIATVYRTRKLHTPANYLIASLAVTDLLVSI LVMPISTMYTVTGRWTLGQVVCDFWLSSDITCCT  
ASIMHLCVIALDRYWAITDAVEYSAKRTPKRAAIMIVLVWVFSISISLPPFFWRQAKAEEMDC  
FVNTDHSVLYTVYSTVGFYLP TLLLIALYGRIVYEARSRIKQTPNKTGKRLTRAQLITDSPGST  
SSVTSINSRAPDVPSESGSPVYVNQVKVRVSDALLEKKKLMAARERKATKTLGIILGAFIVCWLP  
FFIISLVMPICKDACWFHMAIFDFFNWLGYLNSLINPIIYTMSNEDFKQAFHKLIRFKCAG

>Rt-htr1

MNFSNCTNESQCGQSKTLTERTAIALILSLIAIMTTLNSAVMVAICITKKLHQpanylicslal  
TDLLVAILVMPI SITYITTDWV LGYIVCEAWLSLDMTFCTCSILHLCVIALDRYWAITDAVEYT  
PKRTAKRAGVMILTVWTISVFI SMPPLFWRSHNVNSTGEKCI IQHDHVIYTIYSTFGAFYVPSAL  
LILILYRIYHAAKNLYQKRGSSRHFTGRKSESQISTCMNYKLTQTFCVSNLHSCPEVLKHFSDHR  
TCRVPTLENRQGSTEEQQNSNSRERNAARILGLILGT FVFCWLPFFIKELCVGLHLWVASQVVT  
DFLAWLGYINSLINPLLYTSFNEDFKLAFRKLIRCKTHG\*

>Le-htr1

MNITDCPRGSGPERTKSF AEKTAVALTSLVMILT VVLNGVVIAAISLTKKLHQpanylicslal  
TDLLVALTVMPLSILYISAETWLLGQAFCAWLSLDMTFCTCSILHLSAIALDRYWAITDAVQYS  
RRRTGRRVAGMILAAWVLSVSI SMPPLFWR SRMVNGTMGQQCTIRHDHAIYTIYSTFGAFYAPLG  
LILILYRIYRAARTLHRRRASSCKLAHTSCPSEAPRPGSQLGREKGIGE QPVMGRERRAARVL  
GLILGAFVLCWLPFFVKELLAGMQVWAASPTLGDLLTWLGYLNSLVNPLLYTSFNQDFVTAFRRV  
ASCGRYG\*

>Rt-htr1b

MMNQSAECLAPNSVELQANSKHVNCSTKVNPPGGAGITAWGISASVFLCLITLATVLSNGFVIAT  
IYQARKLHTPANILIASLAITDLLVSI LVMPLSIVYTVSGTWSLQVVC DIWLSSDITCCTASIL  
HLCVIALDRYWAITDAVEYSMKRTPERAAGMIVTVWVISICISIPPLFWRQAKAGELMHCTVNTD

QIFYTIYSTFGAFYIPTLLLIALLYGRIYVEARSRILKQTPKQTKGRLTKAQLVTHSSGSSSLSSV  
NSRVNEFPPTETGSPVNLNHVKVSDVLLLEKKRISAARERKATKTLGIILGAFIVCWLPFFIITL  
VLPICKEACWFHHAIFDFFNWLGYLNSLINPIIYTMSNEDFKQAFHKLTRCR\*

### >Cm-htr1

MMNRSIQCLEPNADQLQTNKSTNCSTKLSTQEQESQITALGISLSVFLSLITLAIIVLSNAFVVI  
TISRTRKLQTPANILIASLAVTDLLVSILVLPISIVYTVSGTWTLGQIVCDIWLSSDITCCTASI  
LHLCVIALDRYWAITDAVEYSSKRTPKRAAGMIVTVWVISICISMPPMFWRQSKAGELTHCVVNT  
DQIFYTIYSTFGAFYIPTLLLIALLYGRIYVEARSRILKQSPKRTGKRLTTAQLITNSPGSSSVSS  
VNSRVNENSGETGSPVNLNHVKVSDTLLERKKILAAERKATKTLGIILGAFIVCWLPFFIIS  
LVVPICKEACWFHPAIFDFFTWLGYLNSLINPIIYTMSNDDFKQAFQKLIRFRYFTS

### >Cm-htr1

MDQQNFSTAASEYNTMSSAWDLLGLKVSLSVMAVITLATILSNLFVIVAVCLTRKLHTPANYLI  
ASLAVTDLLVALLVMPISIAFTMQRTWVLGQVMCNIWVLLDVTLCTVSILHLCAIALDRYWAITH  
ALKYTKHRTPFRAGLMIAAAWGIAVCISTSPLEWISSRTQEKQDECVFENNVFYCIFATCVSYFI  
PSLVLVFLYAKIYLAARSRLRAPSTKDSNIQHPEPTSSSQCSVNYNSQDMLNYYVEQPDRLIHI  
KMSSNFLQKKNISAAKERKATKTLGLILGAFIFCWLPFFTTTTLVITICQEACWSNPVLI DFFTWL  
GFVNSLINPVIYTI FNKNFKRAFRKLVLSRLC

### >Dr-htr2b

MANVRQTDSDVDWPSHWAALLILLVIVPTIGGNILVILAVSLERKLQONATNFFLMSLAVADLLVGL  
LVMPIALVTVLYNSTWPLADFLCPIWFLFDVLFSTASIMHLCAISLDRIYIAIKKPIQHSQFKSRA  
KVLAKIALVWLISIGIAIPIPIKGLQFFDHPNITFNKNHTCLLSPEGFRDFKVYGSLVAFFIPLA  
IMMIYLLTIQVLRKKAYLLRSRAARPSISTVFQOELSVLASPEKMVISNGIKRDRTLNPVNPIT  
GDEVPLRRMSTIGKRSMQNLTNEQRASKVLGIVFMLFVVMWCPFFITNVTSVLCERCNGNLVDQL  
LDIFQWVGYSVSSGINPLVYTLFNRTFRLAFRRYITCNYSVTRPKLQRRSKI SFRSSVTENSKRF  
MKHGMKNGISPVGYSQSPIRHRSTQLQTSANIMLDTLLLDNEDCKPDEHVSHV

### >Csa-htr2b

WFMLFLIPIIVLVALGNVLVIVSVCLDRRLRSSTNYFLTSLAVADLLVALVVMPPSLGMIMNNYK  
WPFSDDELCGVWAMLVFFSTSSILHLCMISLDRIYIALSRNYDKLPVAKSVAIRICTVWMTAIG  
IAIPLPVLGAQDRSNLFIGDTCAINVREFAIFGSLVAFLPLIIMFVYTYTLTILTLRKQAREISA  
AMDRPQGGTLRTARNVEQDGDGRSLLLTRQHSHVSGKEWKCEVITPDYSALTKALRQVQALFGF  
GVIIPTSDVKSPNTNRTRERNNNFASKISLQQTRSSTRMSGSEFKQRMVTSITNEQRASKVGFQV  
LGLIFVLFVFCVFWCPFFITNVVSHLDCDSCDQDLMGSEFMNWFVWVGYVSSGVNPCVYTLFSKRFRET  
FFNVLRGRF

### >Rat-htr2A

MEILCEDNISLSSIPNSLMQLGDGPRLYHNDNFNSRDANTSEASNWTIDAENRTNLSCEGYLPPTC  
LSILHLQEKNEWSALLTTVVIIILTIAGNILVIMAVSLEKKLQONATNYFLMSLAADMLLGLVMPV  
SMLTILYGYRWPLPSKLCIAIWIYLDVLFSTASIMHLCAISLDRIYVAIQNPIHHSRFRNSRTKAFLK  
IIAVWTISVGISMPIPVFGLQDDSKVFKEGSCLLADDNFVLIIGSFVAFFIPLTIMVITYFLTIKS  
LQKEATLCVSDLSTRAKLASFSFLPQSSLSSEKLFQRSIHREPGSYAGRRTMQSISNEQKACKVL  
GIVFFLVFVVMWCPFFITNIMAVICKESCENNVIGALLNVFVWVIGYLSSAVNPLVYTLFNKTYRSA

FSRYIQCYKENRKPLQLILVNTIPALAYKSSQLQVGQKNSQEDAEQTVDDCSMVTLGKQQSEE  
NCTDNIETVNEKVSCV

#### >Aj-htr4-like

RKKKTNYFIVSLAFADLLVALVVMPPFAAIELTTGRWSYGETFCLVRTSLDVLLTTASILHLCCIA  
LDRYYAICCCQPLVYRNKMTPMRVALMLGGCWVPTFISFLPIMQGWNSIGINHLIEERKFSGVAN  
ETNCVFLVNRPYALICSAVAFYVPLGLMVLAYQRIYVTAMEHARQIGTLQRAGSAPDSYFGPDHQ  
GSSRMKIETKAAKTLAVIMGCFCLCWAPFFITNVVDPFIRYRVPWQVWTAWLWLGYNINSGLNPFLL  
YAFLNRAFRRRAFLMILCCGDDRYTRHGSFSPSRPYSASVNGTSIALR

#### >Cm-htr4

MWPLTLMRSYFSLAFSASKSEPHDLTGLSMLQKTVLITFLAAVMMMTVLGNLLVMVAVCKDRQLR  
KIKTNYFIVSLAFADLLVSVMPFGAIELIENNWAYGNTFCLVRTSLDVLLTTASILHLCCISL  
DRYYAICCCQPLVYSNKMTPIRVTIMLGGCWVIFLFI SFLPIMKGWNSVGIQELIEDRKFRNDTKH  
CVFMVNKPYAITCSVAFYIPLVLMVLAYQRIYVTAREHVRQIDILKRAGASIDNGQQADQQGH  
RMKTETKAAKTLCIIMGCFCLCWAPFFITNVVDPFINYSVPDQLWTAFLWLGYNINSGLNPFLLYAFL  
LNKSFRAFLTILCCGNRRYRRASFLGQTISSSTAINGSTQVLR

#### >Cm-htr4-like

MMTILGNLLVMVALCMDKQLRKIKTNYFIVSLAFTDLLVAAILVMPFGTIETVQEHWTYGETFCLV  
RTSLDVLLTTASILHLCCIALDRYYAICCKPLVYRNKMT PWRVALMLGGCWVPCFISFLPILQG  
WNTIGITETIEERKFNRAINETYCVFMVNKYAITCSAVAFYIPLILMVLAYQRIYVTAMEHARR  
IGNLQRAGAATDSTDSTEHQSSVMKRETKAAKTLGIIMGCFCLCWAPFFITNIVDPFIEYSTPMQ  
LWNACLWLGYNINSGLNPFLLYAFLNKSFRRAFLIILCCGDHRYGRGAGYGATYTTSVNRTTVILR\*

#### >Dr-htr4-like

MATASDSAEDSVDEVVSKHTSRITLSIVLVTTIIIMTALGNLLVMVALCKDRQLRKKKTNFFIVSL  
AFADLLVALVVMPLAAIELTTGKWNHYGETFCLVRTSLDVLLTTASILHLCCIALDRYYAICCCQPL  
VYNNKMTPVRVSLMLVGCWVIPPFFISFLPIMQSWNTIGIESFIEQRKLNSSRNSTCVFMVNQPYA  
LVCSAVAFYVPLVLMVLAYQRIYVTAMGHARRIGSLHRAGSAPTSTYPNNDQHGSSRIKNETKAA  
KTLAVIMGCFCLCWAPFFVTVVDPFINYSVPWQVWTAWLWLGYNINSGLNPFLLYAFLNRAFRRRA  
LMILCCGDERYARQGGFSPSRQCSESVNGTSSISLRLSFLQSRYSDNSNRFLSCELESQESAIAS

#### >Dr-htr4

MQGCEFPQEDLKSCHGFDPRAPHRNGPLRIDGYMNLSSSTGQMPMEMEEVDTNESNGLAKRVALISF  
LSLVMLMSVLGNLLVMVAVCKDRQLRKIKTNYFIVSLAFADLLVSVLVMPPFGAIELIHQNWIYGE  
TFCLVRTSLDVLLTTASILHLCCISLDRYYAICCCQPLVYRNKMTPLRVTLMI GGCVIIPTVISFL  
PIMQGWNSIGIKDLIDKRKISGNSTVCVFMVNKPYALTCSVAFYLPVLMVLAYQRIYVTAREH  
ARQISMLQRAGGAGNADSADHQRNHRMRTETKAAKTLCIIMGCFCLCWAPFFITNVVDPFIDYSV  
PEQLWAAACLWLGYNINSMNPILYAFLNKSFRRAFLIILCCGHKRYRRPSILGPGTTCTATQINGS  
THVLKYAVLHNGNHNEQEKL SIQNDTESQESCF

#### >Ga-htr4

RKIKTNYFIVSLAFADLLVSVLVMPPFGAIELVHQHWIYGETFCLVRTSLDVLLTTASILHLCCIA  
LDRYYAICCCQPLVYQNKMTPMRVALMMGGCWVPTFISFLPIMLGWNSIGIDHLIEERRYSEGTN

STSCVFMVNKPYALTCSVAFYIPLVLMVLAYQRIYVTARAHALQISVLQRAGGAGVGADSADHQ  
RNHRMRTETKAAKTLICIIMGCFCLCWAPFFITNVVDPFIDYTVPKLWVACLWLWGYINSMLNPIL  
YAFLNKSFRRAFLIILCCGRKRYRR

#### >Ga-htr4-like

LRKKKTNYFIVSLAFADLLVALLVMPFAAIELTTGEWRYGEIFCLVRTSLDVLLTTASILHLCCI  
ALDRYYAICCCQPLVYRHKMTPLRVAGMLSGCWLIPTFISFLPIMQSWNAIGIEDIIEDRRSSGGS  
NDTSCVFLVNRPYALICSTVAFYVPLALMVLAYQRIYVTAMTHVRQIETLQRAGSAPVFGTTPVV  
TVRSSTSSDPTDQYHLRТАASSSSSEHAPIANSRMRIETKAAKTLAVIMGCFCLCWAPFFITNVV  
DPFIHYSVPWQLWTAWLWLGYNINSGLNPFYAFLNRAFRRAFLVILCCGDERYARQGSCSYGHTQ  
RAYSAGSVNGTSMALR

#### >Lec-htr4

VPLCSCHPVSDDTSSQAEKYILAGIFSIIIAVTILGNLLVVAVCKDRHLRRIKTNFYFIVSLAVA  
DLLVAIILVMPFGAVERVQNDWPYGDKFCIIRTSFDVMFTTASIMHLCCIALDRFYAICCKPLVYQ  
NKMTPLRVGLMLGACWVPSLISFIPANGWNIIGIEQQLELRLGQAKEANQTHCIFMVNKVYAV  
ACSLVAFYIPLGLMAAAYQRIYVTARAHARQIGSLQRAVSKDTTGDEVMTMVTSGAASPLRAQHLV  
PVAQATMVQQTOSTFRHETKAAKTLAIIMGCFCLCWAPFFINNVIDPFVNYDTPPQLWDAWLWLG  
YANSALNPLLYAFLNRSFRRAFLAILCCWDAARYRRSSFSGHSVRYSVSTNGSTVQVPV

#### >Le-htr4

FAFSARSDGKPHEIPGFSMVQKTIILITFLSSIIIMTILGNLLVMVAVCKDRQLRKIKTNFYFIVSL  
AFADLLVSVMPFGAIELIQQNWIYGDTFCLVRTSLDVLLTTASILHLCCIALDRYYAICCCQPL  
VYRNKMTRSRIIMLGGCWIIPSFISFLPIMQGWNSIGIQELVEIRKFQNDTNTTYCVFMVNKPY  
AITCSVAFYIPLILMVLAYQRIYVTARAHARQIEMLKRAKTSNESGQHADHHSNHRMKTETKAA  
KTLICIIMGCFCLCWAPFFITNIVDPFIKYSVPDKIWTAFWLWLGYNINSGLNPFYAYLNKSFRRAF  
LTIILCCGERYRRSLLGQTI PCSTATINGSTHVL R

#### >Lo-htr4

MPVMEEADVNESTPEATPQALSSYSVVERIVLITFLSLVMLMTVLGNLLVMVAVCKDRQLRKIKT  
NYFIVSLAFADLLVSVLMPFGAIELIHQNWIYGETFCLVRTSLDVLLTTASILHLCCISLDRYY  
AICCCQPLVYRNKMTPMRVALMLGGCWVPTFISFLPIMQGWNSIGINDLIEQRKFSGEANATLCV  
FMVNKPYALTCSVAFYIPLGLMVLAYQRIYVTAREHARQIGMLQRAGGANSASGSDSADHQNRHR  
MRTETKAAKTLICIIMGCFCLCWAPFFITNVVDPFIDYTVPEKLWTAACLWLWGYINSMLNPFLYAF  
LNKSFRRAFLIILCCGQERYRRPSILGPSAPCTSTQINGSTHVLSGCSSASKLLLWFCNTRPVPV

#### >Lo-htr4-like

RKKKTNYFIVSLAFADLLVAVVMPFAAIELSKGYWEYGETFCLVRTSLDVMLTTASILHLCCIA  
LDRYYAICCCQPLVYRNKMTPMRVALMLGGCWVISFFISFLPIMQSWNAIGIEKIEERKFNNSTN  
ETYCVFLVNRPYAIIICSAVAFYIPLVLMVLAYQRIYITAMEHVVRQIGTLQRAGSAPAYDGS  
DHQ GSSRMKIETKAAKTLAVIMGCFCLCWAPFFITNIDPFIDYSVPWELWTAWLWLGYNINSGLNPF  
YAFLNRAFRRAFLMILCCGNERYVRPGSFGPSRHYTTSVNGTSIALRYFFKCF\*

#### >Mm-htr4

MDKLDANVSSNEGFRSVEKVVLLTFLAVVILMAILGNLLVMVAVCRDRQLRKIKTNYFIVSLAFA  
DLLVSVLVMMPFGAIELVQDIWAYGEMFCLVRTSLDVLLTTASIFHLCCISLDRYYAICCQPLVYR  
NKMTPLRIALMLGGCWVLPFISFLPIMQGWNIGIVDVIEKRKFSHNSNSTWCVFMVNKPYAIT  
CSVVAFYIPLFLMLVAYYRIYVTAKEHAQQIQMLQRAGATSESRPQPADQHSTHRMRTETKAAKT  
LCVIMGCFCLCWAPFFVTNIVDPFIDYTVPEQVWTAFLWLWGYINSGLNPFLYAFLNKSFRRAFLI  
ILCCDDERYKRPPILGQTVPCSTTTINGSTHVLVLRDTVECGGWESRCHLTATSPLVAAQPSDT

#### >Np-htr4

MEELDSNVRPHEGFGVGEKIVLITFISAVILMTTLGNLLVMVAVCRDRQLRKIKTNYFIVSLAFA  
DLLVSVLVMMPFGAIELIQDKWIYGEMFCLVRTSLDVLLTTASILHLCCISLDRYYAICCQPLVYR  
NKMTPLRIALMLGGCWIIPFISFLPIMQGWNSIGILDIEKRKFSKDSNSTYCFIMVNKPYAIT  
CSVVAFYIPLFLMLVAYYRIYVTAREHARQIGVLQRAGAPADHRHQHPDQHTTTHRMKTETKAAKT  
LCIIMGCFCLCWAPFFITNVIDPFIDYSVPGQLWTAFLWLWGYINSGFNPFLYAFLNKSFRRAFLI  
ILCCGDEKYRRPSILGQTVPCSTTTINGSTHVLRYTVLYNGHHQEQQDKLPIQIDPESQESCF

#### >Pm-htr4

MYGNNTTFNNDDETSSQAKEYILAGIFSIIIAVITILGNLLVVVAVCKDRHLRKIKTNYFIVSLAVA  
DLLVAAILVMMPFGAVERVQNDWPYGDKFCIIRTSFDVMFTTASIMHLCCIALDRFYAICCKPLVYQ  
NKMTPLRVGLMLGACWVPSLISFIPIANGWNIIGIEQQLELRLGQAKEANQTHCIFMVNKVYAV  
ACSLVAFYIPLGLMAAAYQRIYVTARAHARQIGSLQRAVSKDTTGDEVMTMVTSGAASPLRAQQLV  
PVAQATMVQQTQSTRFRHETKAAKTLAIMGCFCLCWAPFFINNVIDPFVNYDTPQQQLWDRAWLWLG  
YANSALNPLLYAFLNRSFRRAFLAILCCWDAARYRRSSFSHVSRYSVSTNGSAVQPVPSARVRA  
RARLPSRPRTRAAACPAVSKLVTHFCGAPSPV

#### >Rt-htr4

MDEADVNESTSDGEPHEIPGFSILQKTVLITFLSAIMVMTILGNLLVMVAVCKDRQLRKIKTNYF  
IVSLAFADLLVSVVMMPFGAIELIQQNWIYGDRFCLVRTSLDVLLTTASILHLCCISLDRYYAIC  
CQPLVYRNKMTPLRITIMLGGCWIIPSFISFLPIMQGWNIIGIQELVEERKSSNDTNI TKCVFMV  
NKPFITCSVVAFYVPLLLMLVAYQRIYVTAREHARQIEMLKRAGTSTDSGQQADHSGNHRMKT  
TKAAKTLCIIMGCFCLCWAPFFITNIVDPFINYSVPEQLWTAFLWLWGYINSGFNPFLYAYLNKSF  
RRAFLRILCCGDRYRRSSLLGQTI PCSATTINGS AHVLR

#### >Xt-htr4 \_

MAHNINVTSNEGYGVAARIVLISFISAVILMTILGNLLVMVAVCRDRQLRKIKTNYFIVSLAFAD  
LLVSVLVMMPFGAIELVQEKWIYGEMFCLVRTSLDVLLTTASILHLCCISLDRYYAICCQPLVYRN  
KMTPLRITLMLSGCWIIPFISFLPIMQGWNSIGILDIE TRKYNKSSNSTNCIFMVNKPYAITC  
SVVAFYIPLFLMLVAYYRIYITAREHARQIGVLQRAGAPADHRHQHPDQHTTTHRMKTETKAAKTL  
CIIMGCFCLCWAPFFITNVDPFINYSVPELWTAFLWLWGYINSGLNPFLYAFLNKSFRRAFLII  
LCCGDEKYRRPSILGQTVPCSTTTINGSTHVLRYTVLYNGHQEHDTLPIHIDPESQESCF

#### >XI-htr4.S \_

MLCSEKSLVSMDCIYFIGPIFYRSNEGYGVAARIVLISFISAVILMTILGNLLVMVAVCRDRQL  
RKIKTNYFIVSLAFADLLVSVLVMMPFGAIELVQEKWIYGEMFCLVRTSLDVLLTTASILHLCCIS

LDRYYAICCCQPLVYRNKMTPLRIALMLSGCWI IPTFISFLPIMQGWNSIGILDLIETRKYNKSSN  
STNCIFMVNKPYAITCSVVAFYIPFLLMVLAYYRIYITAREHARQIGVLQRAGAPVDHRHQHPDQ  
HTTHRMKTETKAAKTLCIIMGCFCLCWAPFFITNVVDPFINYSVPVELWTAFLWLGYNGLNPF  
LYAFLNKSFRRAFLIILCCGDEKYRRPSILGQTVPCSTTTINGSTHVLRYTVLYNGHHQEHDTLF  
IHIDPESQESCF

#### >Mm-htr5A

MDLPVNLTSFSLSTPSSLEPNRSLDTEVLRPSRPFLSAFRVLVLTLLGFLAAATFTWNLLVLATI  
LKVRTFHRVPHNLVASMAISDVLVAVLVMPLSLVHELSEGRRWQLGRRLCQLWIACDVLCCCTASIW  
NVTAIALDRYWSITRHLEYTLRTRKRVSVMILLTVALSTVISLAPLLFGWGETYSEPSEECQVS  
REPSYTVFSTVGAFYLPLCVVLFVYWKIYRAAKFRMGSRKTNVSPVPEAVEVKNATQHPQMVF  
VRHATVTFQTEGDTWREQKEQRAALMVGILIGVFLCWFPFFVTELISPLCSWDVPAIWKSI FLW  
LGYSNSFFNPLIYTAFNRSYSSAFKVFFSKQQ

#### >Dr-htr5ab

MTQPNVTALSANISGGSESGNLYRPFVSVLTLTLLAMLVVATFVWNLLVLVTILRVRTFHRVP  
HNLVASMAISDVMVAGLVMPLSLVRELYGRRWILGRALCQVWISCDVLCCTASIWNVTAIALDRY  
WSITRHLEYTLKTRKRISVMIGLTWLLSSVISLSPLFGWGETYSEDSLACQVSQEPSYTVFSTF  
GAFYLPLCVVLFVYWKIYKAAKFRIGSRKTNTITPMAEVIEVKEAERQPQMAFTVRHATVSFQTD  
GETWREQKERRAALMVGILIGVFLCWIPFFLAELIIPLCSCDIPVWKSFLWLGYSNSFFNPL  
IYTAFNKNYNNAFRNLFSRQR

#### >Lec-htr5

MDGNRHSDDLSPNMSTWPMNGSDPWPDPHNVSQPPFSFFSILTFLLAILILATFAWNVLVIVT  
ILRVKTFHCVPHNLVASMAVSDVLAALVMPLSLVSELHRRRWRLGPMCDVWISCDVLCCTASI  
WNVTAVALDRFWSITRHLEYTIRVRKCISNLMIALTWLLSATISLSPLFGWGEYYSKQSDKQCHCF  
SQGPLYTVFSTVGAFYLPLCVVLFVYWKIYKATKFCFGSHKANSVMPISDEIEVRR

#### >csa-htr5

ALAILLVVIVGSI FGNILVVA AVKSERNLQTTANFLICSLAITDFMVA CLVMPFSALYEILGTW  
VFGDILCQFWTAIDIACTASILHLCAIAFERHRSITGAVRYFSQGRRRTRTQTTVGRVRFVDQG  
NIACYPSGSNAVNGGIVPLVKRTQDTLQYRRIPSF EAQQKSTPRIAGIFNCCHKYSDRKQQRRLV  
DQRRSSIMLAHSLSLRAKIKLLKTREVR AIKTLGTIVGAFVICWLPFFAVTLAAAFCDCEIPRSL  
RSIVLWLGYCNSLVNPILYGA FNDRDFHSAFKKLLTSHFYKIRCR\*

#### >Cin-htr5

ALAILLAI I I I G S M F G N I L V V I A V R S E R N L Q T T A N F L I C S L A I T D F L V A C L V M P F S A L Y E I S G T W  
VFGDILCQTWTAIDIACTASILHLCAIAFERHRSITS AVRYFSQGRRHTVAPKIVLVWVLAICI  
SIPPILGWKPSSQQQTQVNNVTTAASTVQRCEVGHYREYTYATLGSFYIPLALLLTAYVRIYRR  
LLNQRRSSIMLAHSLSLRAKVLLKAREVRAIKTLGTIVGAFVICWLPFFAVTLAAAF CNCKMPH  
TLTSIVLWLGYCNSLVNPILYGA FNDRDFYAAF KKL

#### >Dr-htr6

MMSGSPPIPRVEAASDLWKIHRSFNDSSTISDGWSIGGSGPWLLAVMLSLIILVTACGNILLIAL  
VFAHRSRRTSNCFLVSLFLSDLMVALVMPAMPALNVLCGTWVLPAGFCPVWLCFDMCCSASIL



NLCVISLDRYLLIISPLRYKQHMTPPRALLLVGGAWGLAALTSFLPIKMDWHS LGRMQELTEDDP  
GNATHLNSFYPPSSYFQLSSSGMPSTQCRLRVTLFPALVATFLTFFLPSTAICFTYCRILLAARRQ  
ARQVEALTHPAYPQHSLGEPSPRPPSPGHAIQDGGDYSHQEPPLRHAPLSVNSERRLAHRQRKRA  
LKASLTGLVLLGLFFSAWL PFFITNMAQAVCECVPPSFFDAITWLGVCNSTMNP I IYPMFMRDFK  
RALARLLPCCSSSQAPRRPSLPLSLSLRNSGEPQLPSEPPSLVSDPPQLPATATDAVNLLDAEHA  
GIDLPLLLPNQVDTLDD

### >Mm-htr6

MVPEPGPVNSSTPAWGP GPPAPGGSGWVAAALCVVIVLTAANSL LIALICTQPALRNTSNFFL  
VSLFTSDLMVGLVVMPPAMLNALYGRWVLARGLCLLWTAFDVMCCSASILNLCVISLDRYLLI LS  
PLRYKLRMTAPRALALILGAWSLAALASFLP LLLGWHEL GKARTSAPGQCRL LASLPYVLVASGV  
TFFLPSGAICFTYCRILLAARKQAVQVASLTTGTATAGQALET LQVPRTPRPGMESADSRRLTTK  
HSRKALKASLTGLILLSMFFVTWLPFFVASIAQAVCDCISPGLFDVLTWLGVCNSTMNP I IYPLF  
MRDFKRALGRFVPCVHCPPEHRAS PASPSMWTSHSGARPGLSLQQVLPLPLPPNSDSDSASGGTS  
GLQLTAQ LLLPGEATRDPPPTRAPT VVNFFVTD SVEPEIRQHPLGSPMN\*

### >Rt-htr6

MDNGLWAEKGPELGQGA APEGRQWIAAFLCLII IILT TAGNSLLILLIFTQRSLRNTSNYFLVSL  
FMSDLMVGLVVMPPAMLNELYGRWVLESELCSIWYSFDVMCCSASILNLCVISLDRYFLIISPLK  
YKLRMTSCRALFLIFTTWT LAALASFLPIEMGWHEMDFDAQALNSTLELPEEAAQCRFLVSLPYA  
LIASSLTFFLPSVAISFTYCRILLA AKKQAVQVASLTTNVATTSDEPVQVKLPLSQNPSARTSDS  
RKFTKHSKALKASLTGLVLLGMFFVAWL PFFVANVTQAVCECV PALLFDVLTWLGVCNSTMNP I  
IYPLFMRDFKRAMAKYLPCCHRWWERRPTVVSLSMKNSNSGRRLGLSLPNMLTLP PQTGSGDSVI  
QVNEHILLAASKDQQLTKDQQL EDSLQLFELEQT DQEFQGNPLNTPMD\*

### >Mm-htr7

MMDVNSSGRPDLYGHLRSLILPEVGRRLQDLS PDGGAHSVVS SWMPHLLSGFPEVTAS PAPTWDA  
PPDNVSGCGEQIN YGRVEKVVIGSILTLITLLTIAGNCLVVISVCFVKKLRQPSNYLIVSLALAD  
LSVAVAVMPFVSVDLIGGKWI FGHFFCNVFIAMDMCCTASIMTLCVISIDRYLGITRPLTYPV  
RQNGKCMAMILSVWLLSASITL PPLFGWAQNVNDDKVCLISQDFGYTIYSTAVAFYI PMSVMLF  
MYEQIYKAARKSAAKHKFSGFPRVQPE SVISLNGVVKLQKEVEECANLSRLLKHERKNISIFKRE  
QKAATTLGIIVGAFTVCWLPFFLLSTARPFICGTSCSC IPLWVERTCLWLGYANSLINPFIYAFF  
NRDLRTTYRSL LQCQYRNINRKL SAAGMHEALKLAERPERSEFVLQNC DHCGKKGHDT

### >Dr-htr7

MISALTKDRVQSIVNSLTSEVMDV SFLNKIHDTTTTLPTPSFMDNGTRCGVPILSYGHVEKVLIG  
GVLTMLTFLTVCGNLLVVISVCFVKKLQPSNYLIVSLAVADLSVAVVMPFVSITDLIGGQWIF  
GRVFCNVFIAMDMCCTASIMTLCVISIDRYLGITKPLTYPVRQSGKCMAKIVLSVWLLSASITL  
PPLFGWAQNVNDDNVCLISQDLGYTIYSTAVAFYI PMSVMLIMYRIYRVAKDSAAKHTIAGFPK  
AEDEESMNCVTAALKLQREVEECV SFSRLLKSDRKNISIFKREQKAAATLGIIVGAFVCMPPFF  
LLSTARPFICGLQCSCVPLWVERTLLWLGYANSLINPFIYAFFNRDLRTTYHNLIRCRYRNINR  
LSAASMHEALKLAERPDLVL

### >Cin-htr7

MSNLSFCPEDGNTTSAEGDAMLTTALIAALTSLLSLLIVVGNGLIIVSVALVKKLRQPANYLIVS  
LALSDFLVGLVVLPLTIVYDIMGEWVFGPNVCDVHVSFDVICCTASIMNLCMISIDRYLMITQPM  
TYPKRRTGKLMMLLIATAWVLSCLV IIPALFGFTKNVKDGVHVSFAINQTAGYENPMLGEFQVFG  
IKKYGKACLISQERWFTIYSTLGAFYLPLAVMLCMYWKIYLEASRFNARHRLRSYSTTGSQDSTN  
GNAVNLISSSGVVCGLGMKNGFPRNGTTRHNGMEWRFPTISEVDILTSLNEEGEQTNKETETET  
INGKINEEYRARTLYTRASANSLLATEKTPKLVGKPSPRSRLFMLYGKPRLLRATSTPCPTTTNK  
PNTQHTRKSSFRTRLRQNSEITFPCNRRPTVFNQIRRRVSLATSRDRMRNVKATRITLGIVVGAFTF  
CWLPPFFIVTFLRPFACPIPESEQDCIPLWLVRFVLWLGYLNSALNPLIYIGFSPDLRETFRFLICC  
KCTNVDRRLAQIELRQAI AVERKASMASRSYAPESIV\*

### >csa-htr7

ALIAALTSLLSLLIVVGNGLIIVSVALVKKLRQPANYLIVSLALSDFLVGLVVLPLTIVYDIMGE  
WVFGPNVCDVHVSFDVICCTASIMNLCMISIDRYLMITQPM TYPKRRTGKLMMLLIATAWLLSCL  
VIIPALFGFTKNVKDGVHVSFAINQTAGYENPMLGEFQVFGIKKYGKTCLISQERWFTIYSTLGA  
FYLPLAVMLCMYWKIYLEASRFNSRHRLRSYSTSGSQRANGVNGVELIRCESGIALEERNGASRH  
QRANGVEWRFPTISKVNILTSLDENGEETIKRTITSPCDAQQQNGKFFSEYQARTLYTRASAQSL  
IAAEQSLISSGKNGKIPDKTHSRSKLSLLYGQARCCRPRLRTTSSPAQSPSNGSKLSSANVRKA  
SFRTRVQNSEITFPCQRRPTVFNQIRRRVSLATSRDRMRNVKATRITLGIVVGAFTFCWLPPFFIVT  
FLRPFACPIPEAQDCIPLWLVRFVLWLGYLNSALNPLIYIGFSPDLRETFRFLICCKCTNVDRRL  
AQIELRQAI AHERRNSVASRSYAAESIV

## **Unclassified aminergic receptors**

### >Cin-AmR

MIMESTNLVTALPEQNMSLFEVSMSTNTNSTYEPFDSIGIAISAVIIFTFLVLGVVGNLSLTLAV  
ILTYKELNNNLFMRFI FSLCISDLSALISWLFYRRTWGFVDVWDPIPAVFCIFYWATDIMTSYA  
TALHVLVSFAIVRFISVQYPVQYNMKLIHANIWIWGIWVACIISGFIPSMFIFGAKARDRESSP  
DSRWPSCTANLADLDKYILYQKVAYPLFLYIPTIGVVITCILIAVTLKKRSGSANLNKKEERRLR  
KERQAVLQLILIIISFLLGYIPFTAYEFWGANTHPRERYFLVDNWFGMIEYFCLRFSECLNPVF  
YNLGSTKMRTYTKMFLKVVFCIEWQPTTPMSPTSNTRGNKSGVNTIANSVDATLENTNHHNV

### >Csa-AmR1

MANLALAVIYFTVFFFGIIGNAIVLFLVLLRQRRGWSVTTAYL FNLALS DVLFVLPFWGHQYLN  
GLDWAFGLGWCKIVGSVTSINMYASVFFLTAMSA DRYMAVVHATSVNVVRSYIARWVCVAVWFA  
ALLLSLPQLIHQTLHPIFYVQTNSTNASQVSTPGESPMLRDVTSAMAEAPRSYAAPESPIACTFY  
IPAGSSKALRMGLVEFTRSMLGFVVP MIVISVCYAKIVITVKKKVI GKRVRKDRVAKLAALVFLA  
FFFCWLPMQIMKLF SALGGWVKLRVFEFDEDL YNTVYPFMVALAYSNSCINPVVYAFTTTNFQEN  
IKDICGSDKAARPYKMTLSPQQGHNGDPKTGFVTKTEALNMYS PCPKRNMTAYS PAVQVHAAEVS  
TIAQYIELFCSRITPVYVRPVS LVVKCVAF\*



>Ptfl-htr4

MSTNNIHGLPYVFESSDTPATSAVVFVVELETRQPFLITNDNASTWAVSGGVQPGSFNVAERIVI  
GFILSLIILTTIVGNILVCTSIIIFPSLRTLTNYFVFSLAIADVLVACLVMAISTIIYIVTETWY  
GDTFCLVFISFDIAFCTASIMHLSCIAYDRYSAICNPFQYPIKMTSRRVAVMLAACWVVPMLISF  
IPILLGWNTLGIENVI AEVKQHTGPNSCVFLVNRPYAAVASTIAFYIPCILMASAYLFI FRAARK  
QAAQIKSLERATANWNNARNGESGGRGSVSLAAEKKAATLGIIMGCFVWCWCPFFVLNIIDPFC  
DFCISPKVWPPITWLGYTNSMLNPILYAFFNRTFRRAFSRLLRCHVCKGSAAEFDPTITSHERRS  
\*

>Sako-htr4

MESGITSSTDAISYHSFALDKTSRVYVLEVFTDTGEPVIGAVNDNSTGLSGNVLQYGLAERIIIG  
FVLTVIIILTIAGNILVCASIFIFPSLRTLTNYFVFSLAIADILVACLVMTFSTINVVTETWIYG  
DTFCLIFISFDISFCTASIMHLSCIAFDRYSAICNPFQYPLKMTSRRVTIMLASCWVVPMFISFI  
PILLQWNTIGIENVIADVKNFAGPYSCIFLVNKPYAVIASTIAFYMPCILMATAYFFIFRAARKQ  
AQQIKSLERATMNWNNTRNGPGDGHPHHHGRRVSLAAEKKAATLGIIMGCFVICWCPFFVFNIV  
DPFCDFCIDPGAWPPVTWLGYNLSMLNPLLYAFFNRSFRRAFIRLLRCHVCKGTTAEFDPTISSR  
ER\*

## SUPPLEMENTARY INFORMATION

SI Figure 1: Phylogenetic tree for htr4 indeuterostomes and inferred gene gain/loss events

### **Olfactory function in the trace amine-associated receptor family (TAARs) evolved twice independently**

Milan Dieris<sup>1</sup>, Daniel Kowatschew<sup>1</sup>, and Sigrun I. Korsching<sup>1\*</sup>

<sup>1</sup>Institute for Genetics, University at Cologne, Germany

\*Corresponding author, [sigrun.korsching@uni-koeln.de](mailto:sigrun.korsching@uni-koeln.de)



## SUPPLEMENTARY INFORMATION

SI Figure 2: No correlation between genomic coverage and detection of *taar* genes

### **Olfactory function in the trace amine-associated receptor family (TAARs) evolved twice independently**

Milan Dieris<sup>1</sup>, Daniel Kowatschew<sup>1</sup>, and Sigrun I. Korsching<sup>1\*</sup>

<sup>1</sup>Institute for Genetics, University at Cologne, Germany

\*Corresponding author, [sigrun.korsching@uni-koeln.de](mailto:sigrun.korsching@uni-koeln.de)

**A**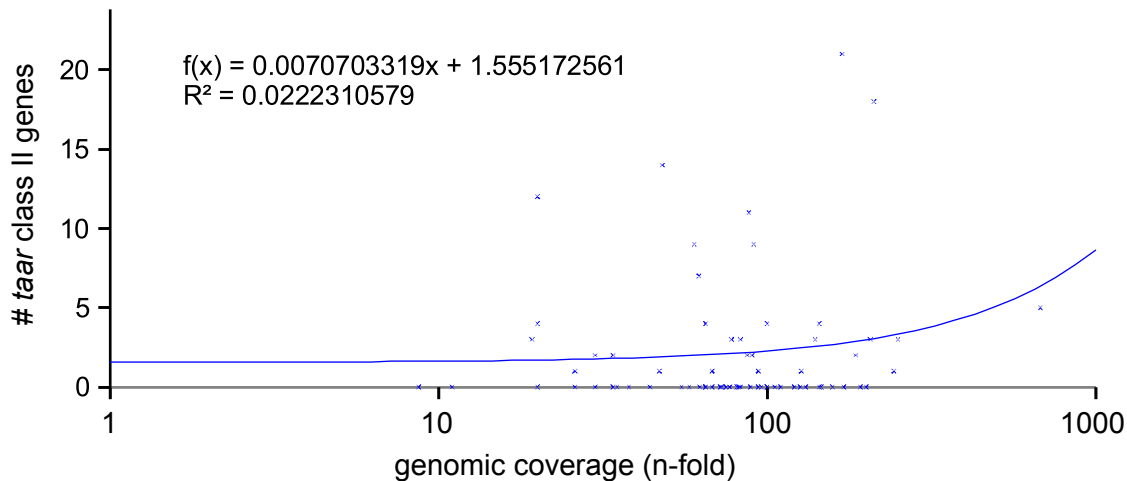**B**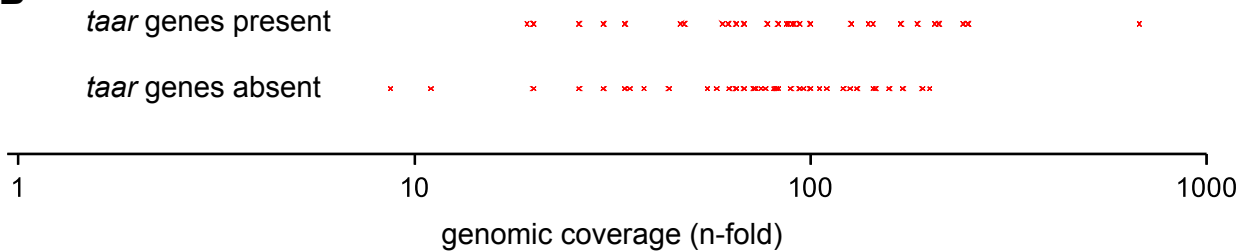

*SI Figure 2 No correlation between genomic coverage and detection of taar genes*

A) Number of *taar* genes is shown for 69 cartilaginous and bony fish species. Each blue cross represents one species. Linear regression and correlation coefficient  $R$  as indicated.

B) Presence respectively absence of *taar* genes is shown for 69 cartilaginous and bony fish species. Each red cross represents one species.



## SUPPLEMENTARY INFORMATION

SI Table 1: Genomic location of all genes analysed

### **Olfactory function in the trace amine-associated receptor family (TAARs) evolved twice independently**

Milan Dieris<sup>1</sup>, Daniel Kowatschew<sup>1</sup>, and Sigrun I. Korsching<sup>1\*</sup>

<sup>1</sup>Institute for Genetics, University at Cologne, Germany

\*Corresponding author, [sigrun.korsching@uni-koeln.de](mailto:sigrun.korsching@uni-koeln.de)

## SUPPLEMENTARY INFORMATION

Table of Contents for SI Table 1: Genomic location of all genes analysed

### **Olfactory function in the trace amine-associated receptor family (TAARs) evolved twice independently**

Milan Dieris<sup>1</sup>, Daniel Kowatschew<sup>1</sup>, and Sigrun I. Korsching<sup>1\*</sup>

<sup>1</sup>Institute for Genetics, University at Cologne, Germany

\*Corresponding author, [sigrun.korsching@uni-koeln.de](mailto:sigrun.korsching@uni-koeln.de)

#### **SI table 1 consists of seven sheets:**

- Sheet 1 Overview: Presence of *htr4*, *taar* and *tarl* genes in non-vertebrate deuterostomes  
*htr4* genes in chordates and hemichordates
- Sheet 2 Overview: Number of *taar* and *tarl* genes in aquatic vertebrates
- Sheet 3 *tarl* genes of jawless vertebrates identified in this study
- Sheet 4 *tarl* genes of jawed vertebrates identified in this study
- Sheet 5 *taar* genes of jawed vertebrates identified in this study
- Sheet 6 Representative reference TAAR sequences
- Sheet 7 Aminergic receptors used as outgroup in phylogenetic analysis

**Overview: Presence of htr4, taar and tarl genes in non-vertebrate deuterostomes (chordates, hemichordates and echinoderms)**

| Belongs to taxonomical group | Abbreviation | Latin species name                   | Vernacular name                | htr4 | taar | tarl |
|------------------------------|--------------|--------------------------------------|--------------------------------|------|------|------|
| echinoderm                   | AcPl         | <i>Acanthaster planci</i>            | Crown-of-thorns starfish       | -    | -    | -    |
| cephalochordate              | Alu          | <i>Asymmetron lucayanum</i>          | Sharptail lancelet             | +    | -    | -    |
| echinoderm                   | ApPa         | <i>Aposilichopus parvimeris</i>      | Warty sea cucumber             | -    | -    | -    |
| echinoderm                   | ApJa         | <i>Aposilichopus japonicus</i>       | Japanese spiky sea cucumber    | -    | -    | -    |
| cephalochordate              | Ebe          | <i>Branchiostoma belcheri</i>        | Chinese amphioxus              | +    | -    | -    |
| cephalochordate              | Bfl          | <i>Branchiostoma floridae</i>        | Florida lancelet               | +    | -    | -    |
| cephalochordate              | Bla          | <i>Branchiostoma lanceolatum</i>     | European lancelet              | +    | -    | -    |
| urochordate                  | Cin          | <i>Ciona intestinalis</i>            | Vase tunicate                  | -    | -    | -    |
| urochordate                  | Csa          | <i>Ciona savignyi</i>                | Pacific transparent sea squirt | -    | -    | -    |
| echinoderm                   | EuTr         | <i>Eucidaris tribuloides</i>         | Slate pencil urchin            | -    | -    | -    |
| echinoderm                   | HePu         | <i>Hemicentrotus pulcherrimus</i>    | a sea urchin                   | -    | -    | -    |
| echinoderm                   | LyVa         | <i>Lyttechinus variegatus</i>        | Green sea urchin               | -    | -    | -    |
| echinoderm                   | OpFa         | <i>Ophionereis fasciata</i>          | Mottled brittle star           | -    | -    | -    |
| echinoderm                   | OpSp         | <i>Ophiodon spiculata</i>            | Spiry brittle star             | -    | -    | -    |
| echinoderm                   | PaMi         | <i>Patria minata</i>                 | Bat star                       | -    | -    | -    |
| echinoderm                   | PaRe         | <i>Patriella regularis</i>           | Common cushion star            | -    | -    | -    |
| hemichordate                 | PIFI         | <i>Ptychodera flava</i>              | Hawaiian acorn worm            | +    | -    | -    |
| hemichordate                 | SaKo         | <i>Saccoglossus kowalevskii</i>      | Acorn worm                     | +    | -    | -    |
| echinoderm                   | SPu          | <i>Strongylocentrotus purpuratus</i> | Purple sea urchin              | -    | -    | -    |

**htr4 genes in cephalochordates and hemichordates**

| Abbreviation            | Latin species name               | Vernacular name     | Gene name   | Accession        | length (full/partial) | Pseudo-gene (Y) | # exons | Database incl. Version number | chr | contig         | location in contig (bp) | Strand (+/-) | Comments                                                     |
|-------------------------|----------------------------------|---------------------|-------------|------------------|-----------------------|-----------------|---------|-------------------------------|-----|----------------|-------------------------|--------------|--------------------------------------------------------------|
| <b>Cephalochordates</b> |                                  |                     |             |                  |                       |                 |         |                               |     |                |                         |              |                                                              |
| Alu                     | <i>Asymmetron lucayanum</i>      | Sharptail lancelet  | <i>htr4</i> | -                | partial               | -               | 3       | GCA_001663935.1               | -   | LZCU01069842.1 | 2645-4248, 3-464        | +, +         | 2 <sup>nd</sup> exon in two contigs, 35aa missing in between |
| Ebe                     | <i>Branchiostoma belcheri</i>    | Chinese amphioxus   | <i>htr4</i> | GeneID:109485254 | full                  | -               | 4       | GCF_001625305.1               | -   | NW_017894398.1 | 521476-519001           | -            | annotated as 5-hydroxytryptamine receptor 4-like             |
| Bfl                     | <i>Branchiostoma floridae</i>    | Florida lancelet    | <i>htr4</i> | GeneID:118414956 | full                  | -               | 3       | GCF_000003815.2               | 4   | NC_049882.1    | 14530149-14532452       | +            | annotated as 5-hydroxytryptamine receptor 4-like             |
| Bla                     | <i>Branchiostoma lanceolatum</i> | European lancelet   | <i>htr4</i> | -                | full                  | -               | 3       | GCA_900088365.1               | -   | FLLO01000036.1 | 925959-928070           | +            |                                                              |
| <b>Hemichordates</b>    |                                  |                     |             |                  |                       |                 |         |                               |     |                |                         |              |                                                              |
| PIFI                    | <i>Ptychodera flava</i>          | Hawaiian acorn worm | <i>htr4</i> | -                | full                  | -               | 1       | GCA_001465055.1               | -   | LD352455.1     | 57543-56371             | -            |                                                              |
| SaKo                    | <i>Saccoglossus kowalevskii</i>  | Acorn worm          | <i>htr4</i> | GeneID:100374682 | full                  | -               | 1       | GCF_000003605.2               | -   | NW_003129357.1 | 24544-25722             | +            | annotated as 5-hydroxytryptamine receptor 4-like             |

Overview: Number of taar and taf genes in aquatic vertebrates

| Abbreviation | Latin species name                   | Vernacular name                    | Class II taar genes |        |        |                      | genome | fold coverage | Database for species without taar and taf genes |
|--------------|--------------------------------------|------------------------------------|---------------------|--------|--------|----------------------|--------|---------------|-------------------------------------------------|
|              |                                      |                                    | taf1                | taar12 | taar13 | Other class II taars |        |               |                                                 |
| Aa           | <i>Anguilla anguilla</i>             | European eel                       | 1                   | 7      | 5      | 0                    | full   | 20.0x         |                                                 |
| Ac           | <i>Amphiprion citrinellus</i>        | Midway cichlid                     | 1                   | 0      | 0      | 0                    | full   | 89.0x         |                                                 |
| Af           | <i>Anoplopoma fimbria</i>            | Sablefish                          | 1                   | 0      | 2      | 0                    | full   | 186.0x        |                                                 |
| Aj           | <i>Anguilla japonica</i>             | Japanese eel                       | 2                   | 9      | 9      | 0                    | full   | 211.0x        |                                                 |
| Al           | <i>Austrolunulius lineatus</i>       | Jarvikii                           | 1                   | 0      | 0      | 0                    | full   | 94.0x         |                                                 |
| Am           | <i>Astyanax mexicanus</i>            | Mexican cavefish                   | 1                   | 3      | 1      | 0                    | full   | 65x           |                                                 |
| Ar           | <i>Anguilla rostrata</i>             | American eel                       | 2                   | 13     | 8      | 0                    | full   | 169x          |                                                 |
| Bp           | <i>Boleophthalmus pectinirostris</i> | Giant blue-spotted mudskipper      | 1                   | 0      | 0      | 0                    | full   | 144x          |                                                 |
| Cc           | <i>Cyprinus carpio</i>               | Common carp                        | 2                   | 15     | 5      | 0                    | full   | n/a           |                                                 |
| Ch           | <i>Clupea harengus</i>               | Herring                            | 1                   | 0      | 1      | 0                    | full   | 127x          |                                                 |
| Cm           | <i>Callorhynchus milii</i>           | Elephant shark                     | 1                   | 0      | 0      | 3                    | full   | 19.25x        |                                                 |
| Cs           | <i>Cynoglossus semilaevis</i>        | Tongue sole                        | 1                   | 0      | 0      | 0                    | full   | 117x/94x      |                                                 |
| Cn           | <i>Cyprinodon nevadensis</i>         | Amargosa pupfish                   | 1                   | 0      | 0      | 0                    | full   | 26.0x         |                                                 |
| Ct           | <i>Cottus menasus</i>                | Rheingopple                        | 1                   | 0      | 0      | 0                    | full   | 11.0x         |                                                 |
| Cv           | <i>Cyprinodon variegatus</i>         | Sheepshead pupfish                 | 1                   | 0      | 0      | 0                    | full   | 81x           |                                                 |
| Dr           | <i>Danio rerio</i>                   | Zebrafish                          | 1                   | 12     | 5      | 0                    | full   | n/a           |                                                 |
| Di           | <i>Dicentrarchus labrax</i>          | European seabass                   | 1                   | 0      | 2      | 0                    | full   | 30x           |                                                 |
| Ei           | <i>Esox lucius</i>                   | Northern pike                      | 2                   | 0      | 1      | 0                    | full   | 243.0x        |                                                 |
| Fh           | <i>Fundulus heteroclitus</i>         | Mummichog                          | 1                   | 0      | 0      | 0                    | full   | 75x           |                                                 |
| Gm           | <i>Gadus morhua</i>                  | Atlantic cod                       | 2                   | 0      | 3      | 0                    | full   | 83x           |                                                 |
| Ga           | <i>Gasterosteus aculeatus</i>        | Three-spined stickleback           | 1                   | 0      | 1      | 0                    | full   | n/a           |                                                 |
| Hb           | <i>Haplochromis burtoni</i>          | Burton's mouth-breeder             | 1                   | 0      | 0      | 0                    | full   | 131x          |                                                 |
| Hc           | <i>Hippocampus comes</i>             | Tiger tail seahorse                | 1                   | 0      | 0      | 0                    | full   | 192x          |                                                 |
| Ip           | <i>Ictalurus punctatus</i>           | Channel catfish                    | 1                   | 2      | 8      | 0                    | full   | n/a           |                                                 |
| Km           | <i>Kryptolebias marmoratus</i>       | Mangrove killifish                 | 1                   | 0      | 0      | 0                    | full   | 72.75x        |                                                 |
| Lb           | <i>Labrus bergylla</i>               | Ballan wrasse                      | 1                   | 0      | 4      | 0                    | full   | 144x          |                                                 |
| Lc           | <i>Larimichthys crocea</i>           | Yellow croaker                     | 1                   | 0      | 3      | 0                    | full   | 140x          |                                                 |
| Lac          | <i>Lates calcarifer</i>              | Asian sea bass                     | 2                   | 0      | 2      | 0                    | full   | 90.0x         |                                                 |
| Lo           | <i>Lepidosteus oculatus</i>          | Spotted gar                        | 1                   | 3      | 1      | 1 taar5-like         | full   | 677.5x        |                                                 |
| Lec          | <i>Lethenteron camtschaticum</i>     | Arctic lamprey                     | 51                  | 0      | 0      | 0                    | full   | 20.0x         |                                                 |
| Lw           | <i>Leuciscus waleckii</i>            | Amur ide                           | 1                   | 1      | 2      | 0                    | full   | 250x          |                                                 |
| Le           | <i>Leucoraja erinacea</i>            | Little skate                       | 1                   | 0      | 0      | 1                    | full   | 26.5x         |                                                 |
| Mz           | <i>Maylandia zebra</i>               | Zebra mbuna                        | 1                   | 0      | 0      | 0                    | full   | 65x           |                                                 |
| Mc           | <i>Mchenga conophoros</i>            | Happy                              | 1                   | 0      | 0      | 0                    | full   | n/a           |                                                 |
| Mm           | <i>Micthys miuy</i>                  | Mi-uy croaker                      | 1                   | 0      | 0      | 0                    | full   | 158x          |                                                 |
| Mom          | <i>Mola mola</i>                     | Ocean sunfish                      | 1                   | 0      | 0      | 0                    | full   | 96x           |                                                 |
| Moa          | <i>Morone chalcis</i>                | Asian swamp eel                    | 1                   | 0      | 0      | 0                    | full   | 146x          |                                                 |
| Ms           | <i>Morone saxatilis</i>              | Striped bass                       | 1                   | 0      | 1      | 0                    | full   | 68.0x         |                                                 |
| Nb           | <i>Neolamprologus brichardi</i>      | Lyretail cichlid                   | 1                   | 0      | 0      | 0                    | full   | 171x          |                                                 |
| Nf           | <i>Nothobranchius furzeri</i>        | Turquoise killifish                | 1                   | 0      | 0      | 0                    | full   | 100x          |                                                 |
| Nc           | <i>Nothothenia coriiceps</i>         | Black rockcod                      | 0                   | 0      | 0      | 0                    | full   | 38x           | GCF_000735185.1                                 |
| On           | <i>Oreochromis niloticus</i>         | Nile tilapia                       | 1                   | 0      | 0      | 0                    | full   | 44.0x         |                                                 |
| Oi           | <i>Oryzias latipes</i>               | Medaka                             | 1                   | 0      | 0      | 0                    | full   | 999x          |                                                 |
| Po           | <i>Paralichthys olivaceus</i>        | Bastard halibut, Japanese flounder | 1                   | 0      | 0      | 0                    | full   | 100.0x        |                                                 |
| Pa           | <i>Pampus argenteus</i>              | Silver pomfret                     | 1                   | 0      | 0      | 0                    | full   | 58.0x         |                                                 |
| Pf           | <i>Periophthalmus schlosseri</i>     | Giant mudskipper                   | 1                   | 0      | 0      | 0                    | full   | 65x           |                                                 |
| Pem          | <i>Periophthalmus magnuspinnatus</i> | Giant-fin mudskipper               | 1                   | 0      | 0      | 0                    | full   | 77x           |                                                 |
| Pm           | <i>Petromyzon marinus</i>            | Marine lamprey                     | 32                  | 0      | 0      | 0                    | full   | 62.36x        |                                                 |
| Pp           | <i>Pimephales promelas</i>           | Fathead minnow                     | 1                   | 5      | 2      | 0                    | full   | 62.0x         |                                                 |
| Pf           | <i>Poecilia formosa</i>              | Amazon molly                       | 1                   | 0      | 0      | 0                    | full   | 82x           |                                                 |
| Pt           | <i>Poecilia latipinna</i>            | Sailfin molly                      | 1                   | 0      | 0      | 0                    | full   | 34x           |                                                 |
| Pom          | <i>Poecilia mexicana</i>             | Shortfin molly                     | 1                   | 0      | 0      | 0                    | full   | 30x           |                                                 |
| Pr           | <i>Poecilia reticulata</i>           | Guppy                              | 1                   | 0      | 0      | 0                    | full   | 110.0x        |                                                 |
| Py           | <i>Pseudopleuronectes yokohamae</i>  | Marbled flounder                   | 1                   | 0      | 0      | 0                    | full   | 35x           |                                                 |
| Pun          | <i>Pundamilia nyererei</i>           | Nyererei Victoria barb             | 1                   | 0      | 0      | 0                    | full   | 125x          |                                                 |
| Pyn          | <i>Pygocentrus nattereri</i>         | Red-bellied piranha                | 1                   | 5      | 4      | 0                    | full   | 91x           |                                                 |
| Rt           | <i>Rhincodon typus</i>               | Whale shark                        | 2                   | 0      | 0      | 4                    | full   | 20.0x         |                                                 |
| Ss           | <i>Salmo salar</i>                   | Atlantic salmon                    | 3                   | 0      | 3      | 0                    | full   | 206.0x        |                                                 |
| Sh           | <i>Scartelatae histophorus</i>       | Blue mudskipper, walking goby      | 1                   | 0      | 0      | 0                    | full   | 72x           |                                                 |
| Sf           | <i>Scleropages formosus</i>          | Dragonfish, Asian bonytongue       | 2                   | 0      | 4      | 0                    | full   | 100x          |                                                 |
| Sea          | <i>Sebastes aleutianus</i>           | Rougheye rockfish                  | 1                   | 0      | 3      | 0                    | full   | 78.0x         |                                                 |
| Sem          | <i>Sebastes minor</i>                | Akagaya                            | 1                   | 0      | 2      | 0                    | full   | 34.0x         |                                                 |
| Ses          | <i>Sebastes steindachneri</i>        | Yanaginomai                        | 1                   | 0      | 1      | 0                    | full   | 47.0x         |                                                 |
| Sh           | <i>Sebastes nigropectus</i>          | Tiger rockfish                     | 1                   | 0      | 1      | 0                    | full   | 94.0x         |                                                 |
| Ser          | <i>Sebastes rubrivinctus</i>         | Flag rockfish                      | 1                   | 0      | 2      | 0                    | full   | 87.0x         |                                                 |
| Sa           | <i>Sinocyclocheilus anshuensis</i>   | Anshu s00rhual                     | 2                   | 4      | 5      | 0                    | full   | 60x           |                                                 |
| Sg           | <i>Sinocyclocheilus grahami</i>      | Golden-line barbel                 | 1                   | 6      | 5      | 0                    | full   | 88x           |                                                 |
| Sr           | <i>Sinocyclocheilus rhinoceros</i>   | Ninassar-s00rhual                  | 2                   | 7      | 7      | 0                    | full   | 48x           |                                                 |
| Ssp          | <i>Siganes parvus</i>                | Bicolor damselfish                 | 1                   | 0      | 0      | 0                    | full   | 121x          |                                                 |
| Tf           | <i>Takifugu flaviscus</i>            | Yellowbelly pufferfish             | 0                   | 0      | 0      | 0                    | full   | 200x          | GCA_003711565.2                                 |
| Tr           | <i>Takifugu rubripes</i>             | Japanese pufferfish, torafugu      | 1                   | 0      | 0      | 0                    | full   | 8.7x          |                                                 |
| Tn           | <i>Tetraodon nigroviridis</i>        | Spotted green pufferfish           | 1                   | 0      | 0      | 0                    | full   | n/a           |                                                 |
| To           | <i>Thunnus orientalis</i>            | Pacific bluefin tuna               | 2                   | 0      | 0      | 0                    | full   | 54.9x         |                                                 |
| Xl           | <i>Xenopus laevis</i>                | African clawed frog                | 1                   | n.d.   | n.d.   | n.d.                 | full   | 30x           |                                                 |
| Xt           | <i>Xenopus tropicalis</i>            | Western clawed frog                | 1                   | 4*     | 0      | 0                    | full   | 7.6x          | * Syed et al., 2015 - DOI 10.1038/nrep13935     |
| Xc           | <i>Xiphophorus couchianus</i>        | Monterrey platyfish                | 1                   | 0      | 0      | 0                    | full   | 77x           |                                                 |
| Xh           | <i>Xiphophorus helleri</i>           | Green swordtail                    | 0                   | 0      | 0      | 0                    | full   | 68x           | GCA_003331165.2                                 |
| Xm           | <i>Xiphophorus maculatus</i>         | Southern platyfish                 | 1                   | 0      | 0      | 0                    | full   | 83x           |                                                 |

## tar1 genes of jawless vertebrates identified in this study

| Species (Latin name and abbreviation) | Gene name     | synonyms     | Accession  | length (full, partial) | Pseudo-gene (Y) | *, stop, 1, frameshift | # exons | Database incl. Version number | chr | contig         | location in contig (bp) | Strand (+/-) | Comments                               |
|---------------------------------------|---------------|--------------|------------|------------------------|-----------------|------------------------|---------|-------------------------------|-----|----------------|-------------------------|--------------|----------------------------------------|
| <b>Jawless vertebrates</b>            |               |              |            |                        |                 |                        |         |                               |     |                |                         |              |                                        |
| <i>Leishneron cantschalicum</i> (Lec) | <i>tar1a</i>  | -            | -          | full                   | -               | -                      | 1       | GCA_000466285.1               | -   | KE994369.1     | 40635-41954             | +            |                                        |
| <i>Leishneron cantschalicum</i> (Lec) | <i>tar1b</i>  | -            | -          | full                   | ψ               | !                      | 1       | GCA_000466285.1               | -   | APL01100547.1  | 1474-2801               | +            |                                        |
| <i>Leishneron cantschalicum</i> (Lec) | <i>tar1c</i>  | -            | -          | full                   | -               | -                      | 1       | GCA_000466285.1               | -   | KE994369.1     | 2941-2926               | +            |                                        |
| <i>Leishneron cantschalicum</i> (Lec) | <i>tar1a</i>  | -            | -          | full                   | -               | -                      | 1       | GCA_000466285.1               | -   | KE994369.1     | 162-1100                | +            |                                        |
| <i>Leishneron cantschalicum</i> (Lec) | <i>tar12b</i> | -            | -          | partial                | -               | -                      | 1       | GCA_000466285.1               | -   | KE994480.1     | 13204-13944             | +            |                                        |
| <i>Leishneron cantschalicum</i> (Lec) | <i>tar13a</i> | -            | -          | full                   | -               | -                      | 2       | GCA_000466285.1               | -   | KE994369.1     | 8911-10535              | +            |                                        |
| <i>Leishneron cantschalicum</i> (Lec) | <i>tar13b</i> | -            | -          | full                   | -               | -                      | 1       | GCA_000466285.1               | -   | KE994369.1     | 4915-50784              | -            |                                        |
| <i>Leishneron cantschalicum</i> (Lec) | <i>tar13c</i> | -            | -          | full                   | -               | -                      | 1       | GCA_000466285.1               | -   | KE994369.1     | 6652-67515              | +            |                                        |
| <i>Leishneron cantschalicum</i> (Lec) | <i>tar14a</i> | -            | -          | full                   | -               | -                      | 1       | GCA_000466285.1               | -   | KE993775.1     | 1364576-1365646         | +            |                                        |
| <i>Leishneron cantschalicum</i> (Lec) | <i>tar14b</i> | -            | -          | full                   | -               | -                      | 1       | GCA_000466285.1               | -   | KE993775.1     | 1544889-1545953         | +            |                                        |
| <i>Leishneron cantschalicum</i> (Lec) | <i>tar14c</i> | -            | -          | full                   | -               | -                      | 1       | GCA_000466285.1               | -   | KE993775.1     | 1436910-1437974         | +            |                                        |
| <i>Leishneron cantschalicum</i> (Lec) | <i>tar14d</i> | -            | -          | full                   | -               | -                      | 1       | GCA_000466285.1               | -   | KE993775.1     | 1393333-1394397         | +            |                                        |
| <i>Leishneron cantschalicum</i> (Lec) | <i>tar14e</i> | -            | -          | partial                | -               | -                      | 1       | GCA_000466285.1               | -   | KE993829.1     | 1308332-1308916         | -            |                                        |
| <i>Leishneron cantschalicum</i> (Lec) | <i>tar15a</i> | -            | -          | full                   | -               | -                      | 1       | GCA_000466285.1               | -   | KE993679.1     | 5764171-5765184         | +            |                                        |
| <i>Leishneron cantschalicum</i> (Lec) | <i>tar15b</i> | -            | -          | full                   | -               | -                      | 1       | GCA_000466285.1               | -   | KE993688.1     | 1032661-1033701         | -            |                                        |
| <i>Leishneron cantschalicum</i> (Lec) | <i>tar15c</i> | -            | -          | full                   | -               | -                      | 1       | GCA_000466285.1               | -   | KE993689.1     | 1019923-1020969         | -            |                                        |
| <i>Leishneron cantschalicum</i> (Lec) | <i>tar15d</i> | -            | -          | partial                | ψ               | !                      | 2       | GCA_000466285.1               | -   | KE997555.1     | 6843-5134               | -            |                                        |
| <i>Leishneron cantschalicum</i> (Lec) | <i>tar15e</i> | -            | -          | full                   | -               | -                      | 1       | GCA_000466285.1               | -   | KE993775.1     | 473955-475010           | +            |                                        |
| <i>Leishneron cantschalicum</i> (Lec) | <i>tar15b</i> | -            | -          | full                   | -               | -                      | 1       | GCA_000466285.1               | -   | KE993775.1     | 486091-487152           | +            |                                        |
| <i>Leishneron cantschalicum</i> (Lec) | <i>tar15c</i> | -            | -          | full                   | -               | -                      | 1       | GCA_000466285.1               | -   | KE994203.1     | 259736-260932           | -            |                                        |
| <i>Leishneron cantschalicum</i> (Lec) | <i>tar15e</i> | -            | -          | full                   | -               | -                      | 1       | GCA_000466285.1               | -   | KE994203.1     | 296524-297528           | -            |                                        |
| <i>Leishneron cantschalicum</i> (Lec) | <i>tar15e</i> | -            | -          | full                   | -               | -                      | 1       | GCA_000466285.1               | -   | KE994203.1     | 278253-279257           | -            |                                        |
| <i>Leishneron cantschalicum</i> (Lec) | <i>tar15f</i> | -            | -          | partial                | -               | -                      | 1       | GCA_000466285.1               | -   | KE993775.1     | 14829-15527             | -            |                                        |
| <i>Leishneron cantschalicum</i> (Lec) | <i>tar15g</i> | -            | -          | full                   | -               | -                      | 1       | GCA_000466285.1               | -   | KE993775.1     | 14829-15833             | -            |                                        |
| <i>Leishneron cantschalicum</i> (Lec) | <i>tar15h</i> | -            | -          | full                   | -               | -                      | 1       | GCA_000466285.1               | -   | KE993775.1     | 344070-345134           | -            |                                        |
| <i>Leishneron cantschalicum</i> (Lec) | <i>tar15i</i> | -            | -          | full                   | -               | -                      | 1       | GCA_000466285.1               | -   | KE993775.1     | 357394-358448           | +            |                                        |
| <i>Leishneron cantschalicum</i> (Lec) | <i>tar15j</i> | -            | -          | full                   | -               | -                      | 1       | GCA_000466285.1               | -   | KE993775.1     | 327596-328657           | +            |                                        |
| <i>Leishneron cantschalicum</i> (Lec) | <i>tar15k</i> | -            | -          | full                   | -               | -                      | 1       | GCA_000466285.1               | -   | KE994615.1     | 4070-5116               | +            |                                        |
| <i>Leishneron cantschalicum</i> (Lec) | <i>tar15l</i> | -            | -          | full                   | -               | -                      | 1       | GCA_000466285.1               | -   | KE994615.1     | 62137-63192             | +            |                                        |
| <i>Leishneron cantschalicum</i> (Lec) | <i>tar15m</i> | -            | -          | full                   | -               | -                      | 1       | GCA_000466285.1               | -   | KE994615.1     | 51233-52267             | -            |                                        |
| <i>Leishneron cantschalicum</i> (Lec) | <i>tar15n</i> | -            | -          | full                   | -               | -                      | 1       | GCA_000466285.1               | -   | KE993775.1     | 440758-441810           | +            |                                        |
| <i>Leishneron cantschalicum</i> (Lec) | <i>tar15o</i> | -            | -          | full                   | -               | -                      | 1       | GCA_000466285.1               | -   | KE993775.1     | 406856-407875           | +            |                                        |
| <i>Leishneron cantschalicum</i> (Lec) | <i>tar15p</i> | -            | -          | full                   | -               | -                      | 1       | GCA_000466285.1               | -   | KE993775.1     | 419329-420384           | +            |                                        |
| <i>Leishneron cantschalicum</i> (Lec) | <i>tar15q</i> | -            | -          | full                   | -               | -                      | 1       | GCA_000466285.1               | -   | APL01103800.1  | 1115-45                 | -            |                                        |
| <i>Leishneron cantschalicum</i> (Lec) | <i>tar15r</i> | -            | -          | full                   | -               | -                      | 1       | GCA_000466285.1               | -   | KE993775.1     | 380880-381923           | +            |                                        |
| <i>Leishneron cantschalicum</i> (Lec) | <i>tar15s</i> | -            | -          | full                   | -               | -                      | 1       | GCA_000466285.1               | -   | KE993775.1     | 218537-219592           | +            |                                        |
| <i>Leishneron cantschalicum</i> (Lec) | <i>tar15t</i> | -            | -          | full                   | -               | -                      | 1       | GCA_000466285.1               | -   | KE993775.1     | 204658-205671           | +            |                                        |
| <i>Leishneron cantschalicum</i> (Lec) | <i>tar15u</i> | -            | -          | full                   | -               | -                      | 1       | GCA_000466285.1               | -   | KE993775.1     | 279150-280196           | +            |                                        |
| <i>Leishneron cantschalicum</i> (Lec) | <i>tar15v</i> | -            | -          | full                   | -               | -                      | 1       | GCA_000466285.1               | -   | KE993775.1     | 303461-304497           | +            |                                        |
| <i>Leishneron cantschalicum</i> (Lec) | <i>tar15w</i> | -            | -          | full                   | -               | -                      | 1       | GCA_000466285.1               | -   | KE993775.1     | 452976-454028           | +            |                                        |
| <i>Leishneron cantschalicum</i> (Lec) | <i>tar15x</i> | -            | -          | full                   | -               | -                      | 1       | GCA_000466285.1               | -   | KE993775.1     | 465265-466299           | +            |                                        |
| <i>Leishneron cantschalicum</i> (Lec) | <i>tar17a</i> | -            | -          | full                   | -               | -                      | 2       | GCA_000466285.1               | -   | KE993775.1     | 570318-572603           | +            |                                        |
| <i>Leishneron cantschalicum</i> (Lec) | <i>tar17b</i> | -            | -          | full                   | -               | -                      | 1       | GCA_000466285.1               | -   | KE994615.1     | 10587-11681             | -            |                                        |
| <i>Leishneron cantschalicum</i> (Lec) | <i>tar17c</i> | -            | -          | full                   | -               | -                      | 1       | GCA_000466285.1               | -   | KE993904.1     | 434011-435126           | -            |                                        |
| <i>Leishneron cantschalicum</i> (Lec) | <i>tar17d</i> | -            | -          | partial                | -               | -                      | 1       | GCA_000466285.1               | -   | APL01179032.1  | 171-950                 | -            |                                        |
| <i>Leishneron cantschalicum</i> (Lec) | <i>tar17e</i> | -            | -          | full                   | -               | -                      | 1       | GCA_000466285.1               | -   | KE993775.1     | 520997-522049           | +            |                                        |
| <i>Leishneron cantschalicum</i> (Lec) | <i>tar17f</i> | -            | -          | full                   | -               | -                      | 1       | GCA_000466285.1               | -   | KE993775.1     | 484975-496018           | +            |                                        |
| <i>Leishneron cantschalicum</i> (Lec) | <i>tar17g</i> | -            | -          | full                   | -               | -                      | 1       | GCA_000466285.1               | -   | KE993775.1     | 504937-506051           | +            |                                        |
| <i>Leishneron cantschalicum</i> (Lec) | <i>tar17h</i> | -            | -          | full                   | -               | -                      | 1       | GCA_000466285.1               | -   | KE993775.1     | 552642-563817           | +            |                                        |
| <i>Leishneron cantschalicum</i> (Lec) | <i>tar17i</i> | -            | -          | full                   | -               | -                      | 1       | GCA_000466285.1               | -   | KE993775.1     | 559513-560583           | +            |                                        |
| <i>Leishneron cantschalicum</i> (Lec) | <i>tar17j</i> | -            | -          | full                   | -               | -                      | 1       | GCA_000466285.1               | -   | KE993775.1     | 537538-538587           | +            |                                        |
| <i>Lamprota fluviatilis</i> (Laf)     | <i>tar14a</i> | LOR12        | AAC82384.1 | partial                | -               | -                      | 1       | n.a.                          | -   | AF069549.1     | 1-774                   | n.a.         |                                        |
| <i>Lamprota fluviatilis</i> (Laf)     | <i>tar15a</i> | LOR4         | AAC82382.1 | partial                | -               | -                      | 1       | n.a.                          | -   | AF069547.1     | 1-1059                  | n.a.         |                                        |
| <i>Lamprota fluviatilis</i> (Laf)     | <i>tar15b</i> | LOR22        | AAC82385.1 | partial                | -               | -                      | 1       | n.a.                          | -   | AF069550.1     | 1-768                   | n.a.         |                                        |
| <i>Lamprota fluviatilis</i> (Laf)     | <i>tar15c</i> | LOR6         | AAC82388.1 | partial                | -               | -                      | 1       | n.a.                          | -   | AF069553.1     | 1-510                   | n.a.         |                                        |
| <i>Lamprota fluviatilis</i> (Laf)     | <i>tar15d</i> | LOR20        | AAC82387.1 | partial                | -               | -                      | 1       | n.a.                          | -   | AF069552.1     | 1-543                   | n.a.         |                                        |
| <i>Lamprota fluviatilis</i> (Laf)     | <i>tar15e</i> | LOR14        | AAC82383.1 | partial                | -               | -                      | 1       | n.a.                          | -   | AF069548.1     | 1-1020                  | n.a.         |                                        |
| <i>Lamprota fluviatilis</i> (Laf)     | <i>tar15f</i> | LOR25        | AAC82386.1 | partial                | -               | -                      | 1       | n.a.                          | -   | AF069551.1     | 1-519                   | n.a.         |                                        |
| <i>Lamprota fluviatilis</i> (Laf)     | <i>tar15g</i> | LOR16        | AAC82389.1 | partial                | -               | -                      | 1       | n.a.                          | -   | AF069554.1     | 1-522                   | n.a.         |                                        |
| <i>Lamprota fluviatilis</i> (Laf)     | <i>tar17a</i> | LOR3         | AAC82381.1 | partial                | -               | -                      | 1       | n.a.                          | -   | AF069546.1     | 1-1056                  | n.a.         |                                        |
| <i>Petromyzon marinus</i> (Pm)        | <i>tar11a</i> | -            | -          | full                   | -               | -                      | 1       | GCA_002833325.1               | -   | P1Z10100032.1  | 6275329-6276639         | +            |                                        |
| <i>Petromyzon marinus</i> (Pm)        | <i>tar12a</i> | -            | -          | partial                | -               | -                      | 1       | GCA_002833325.1               | -   | P1Z10100032.1  | 6253583-6254518         | +            |                                        |
| <i>Petromyzon marinus</i> (Pm)        | <i>tar12b</i> | -            | -          | partial                | ψ               | !                      | 1       | GCA_002833325.1               | -   | P1Z101000103.1 | 284940-285702           | +            |                                        |
| <i>Petromyzon marinus</i> (Pm)        | <i>tar12c</i> | -            | -          | full                   | -               | -                      | 2       | GCA_002833325.1               | -   | P1Z101000103.1 | 284148-285702           | +            |                                        |
| <i>Petromyzon marinus</i> (Pm)        | <i>tar13a</i> | -            | -          | partial                | -               | -                      | 1       | GCA_002833325.1               | -   | P1Z10100032.1  | 6299113-6300003         | -            |                                        |
| <i>Petromyzon marinus</i> (Pm)        | <i>tar14a</i> | -            | -          | full                   | ψ               | !                      | 1       | WGS_VDB://AEFG01              | -   | AEFG01051656.1 | 3845-2811               | -            | WGS, not found in genome assembly      |
| <i>Petromyzon marinus</i> (Pm)        | <i>tar14b</i> | -            | -          | full                   | -               | -                      | 1       | WGS_VDB://AEFG01              | -   | AEFG01054923.1 | 3064-4137               | +            | WGS, not found in genome assembly      |
| <i>Petromyzon marinus</i> (Pm)        | <i>tar15a</i> | #            | TAAR335*   | full                   | -               | -                      | 1       | GCA_002833325.1               | -   | P1Z101001092.1 | 11747-12763             | +            |                                        |
| <i>Petromyzon marinus</i> (Pm)        | <i>tar15b</i> | #            | TAAR335*   | full                   | -               | -                      | 1       | WGS_VDB://AEFG01              | -   | AEFG01032376.1 | 5123-6163               | +            | WGS, in genome assembly incomplete     |
| <i>Petromyzon marinus</i> (Pm)        | <i>tar15c</i> | #            | TAAR335*   | full                   | -               | -                      | 1       | WGS_VDB://AEFG01              | -   | AEFG01032376.1 | 2293-3333               | +            | WGS, frame shift in genome assembly    |
| <i>Petromyzon marinus</i> (Pm)        | <i>tar15d</i> | -            | -          | partial                | -               | -                      | 1       | WGS_VDB://AEFG01              | -   | P1Z10100009.1  | 10839713-10840192       | -            |                                        |
| <i>Petromyzon marinus</i> (Pm)        | <i>tar15a</i> | #, TAAR353*  | TAAR335*   | full                   | -               | -                      | 1       | WGS_VDB://AEFG01              | -   | AEFG01071253.1 | 6274-7332               | -            | WGS, not found in genome assembly      |
| <i>Petromyzon marinus</i> (Pm)        | <i>tar15b</i> | #, TAAR335*  | TAAR335*   | full                   | -               | -                      | 1       | GCA_002833325.1               | -   | P1Z101005860.1 | 3568-4575               | -            |                                        |
| <i>Petromyzon marinus</i> (Pm)        | <i>tar15c</i> | #, TAAR353b* | TAAR335*   | full                   | -               | -                      | 1       | WGS_VDB://AEFG01              | -   | AEFG01071256.1 | 5971-6783               | -            | WGS, 2 frame shifts in genome assembly |
| <i>Petromyzon marinus</i> (Pm)        | <i>tar15d</i> | #, TAAR355a* | TAAR335*   | full                   | -               | -                      | 1       | WGS_VDB://AEFG01              | -   | AEFG01071255.1 | 1898-2965               | -            | WGS, not found in genome assembly      |
| <i>Petromyzon marinus</i> (Pm)        | <i>tar15e</i> | #, TAAR354*  | TAAR335*   | full                   | -               | -                      | 1       | WGS_VDB://AEFG01              | -   | AEFG01071258.1 | 13628-14692             | -            | WGS, frame shift in genome assembly    |
| <i>Petromyzon marinus</i> (Pm)        | <i>tar15f</i> | TAAR353*     | TAAR335*   | full                   | -               | -                      | 1       | WGS_VDB://AEFG01              | -   | AEFG01041529.1 | 3108-4169               | -            | WGS, not found in genome assembly      |
| <i>Petromyzon marinus</i> (Pm)        | <i>tar15g</i> | TAAR389*     | TAAR335*   | full                   | -               | -                      | 1       | WGS_VDB://AEFG01              | -   | AEFG01028892.1 | 1473-2552               | -            | WGS, frame shift in genome assembly    |
| <i>Petromyzon marinus</i> (Pm)        | <i>tar15h</i> | #, TAAR345*  | TAAR335*   | full                   | -               | -                      | 1       | GCA_002833325.1               | -   | P1Z10100032.1  | 322327-322354           | -            |                                        |
| <i>Petromyzon marinus</i> (Pm)        | <i>tar15i</i> | TAAR351*     | TAAR335*   | full                   | -               | -                      | 1       |                               |     |                |                         |              |                                        |

tsr genes of jawed vertebrates identified in this study

| Species (Latin name and abbreviation)         | Gene name | automated annotation | Accession        | length (full, partial) | Pseudo-gene (Ψ) | *_stop; 1, frameshift | # exons | Database incl. Version number | chr   | contig          | location in contig (bp) | Strand (+/-) | Comments                                                  |
|-----------------------------------------------|-----------|----------------------|------------------|------------------------|-----------------|-----------------------|---------|-------------------------------|-------|-----------------|-------------------------|--------------|-----------------------------------------------------------|
| <b>Cartilaginous fish</b>                     |           |                      |                  |                        |                 |                       |         |                               |       |                 |                         |              |                                                           |
| <i>Callorhynchus milii</i> (Cm)               | tsr2      | 5-HTR4-like          | LOC103186492     | full                   | -               | -                     | 1       | GCF_0001663975.1              | -     | NW_006890197.1  | 1614139-1615236         | +            |                                                           |
| <i>Leucoraja erinacea</i> (Le)                | tsr2      | -                    | -                | full                   | Ψ               | 1*                    | 1       | WGS_VDB//AESE01               | -     | AESE010035790.1 | 124-760-4-312           | +, -         |                                                           |
| <i>Rhinodon taylori</i> (Rt)                  | tsr1      | -                    | LOC109911122     | full                   | -               | -                     | 1       | GCF_001624345.1               | -     | NW_018027816.1  | 4655-5698               | -            |                                                           |
| <i>Rhinodon taylori</i> (Rt)                  | tsr2      | 5-HTR4-like          | LOC109915544     | full                   | -               | -                     | 1       | GCF_001624345.1               | -     | NW_018027816.1  | 181321-182421           | -            |                                                           |
| <b>Amphibians</b>                             |           |                      |                  |                        |                 |                       |         |                               |       |                 |                         |              |                                                           |
| <i>Xenopus laevis</i> (Xl)                    | tsr1      | TAAR1-like           | LOC108719346     | full                   | -               | -                     | 1       | GCF_0001663975.1              | 1L    | NC_030724.1     | 2828991-2830067         | -            | all five tsar genes on chromosome 5, tsr4 on chromosome 3 |
| <i>Xenopus tropicalis</i> (Xt)                | tsr1      | TAAR1                | LOC100496115     | full                   | -               | -                     | 1       | GCF_000004195.3               | 1     | NC_030677.1     | 5537899-5538957         | +            |                                                           |
| <b>Bony fish</b>                              |           |                      |                  |                        |                 |                       |         |                               |       |                 |                         |              |                                                           |
| <i>Anguilla anguilla</i> (Aa)                 | tsr1      | -                    | -                | full                   | -               | -                     | 1       | GCA_000695075.1               | -     | AZBK01800005.1  | 9-1076                  | +            |                                                           |
| <i>Anguilla japonica</i> (Aj)                 | tsr1a     | -                    | -                | full                   | -               | -                     | 1       | GCA_003597225.1               | -     | BEWY0100002.1   | 9612299-9613369         | +            |                                                           |
| <i>Anguilla japonica</i> (Aj)                 | tsr1b     | -                    | -                | full                   | -               | -                     | 1       | GCA_003597225.1               | -     | BEWY01000015.1  | 12067318-12068430       | +            |                                                           |
| <i>Anguilla rostrata</i> (Ar)                 | tsr1      | -                    | -                | full                   | -               | -                     | 1       | WGS_VDB//LTYT01               | -     | LTYT010023492.1 | 67811-68817             | +            | GCA_001606085.1                                           |
| <i>Anguilla rostrata</i> (Ar)                 | tsr2      | -                    | -                | full                   | -               | -                     | 1       | WGS_VDB//LTYT01               | -     | LTYT01004196.1  | 172162-173274           | +            | GCA_001606085.1                                           |
| <i>Anoplopoma fimbria</i> (Af)                | tsr1      | -                    | -                | full                   | -               | -                     | 1       | GCA_000499045.1               | -     | AWGY01160213.1  | 10245-11303             | -            |                                                           |
| <i>Amphiphys citrinellus</i> (Ac)             | tsr1      | -                    | -                | full                   | -               | -                     | 2       | GCA_013435755.1               | -     | CMQ24197.1      | 22725795-22724719       | -            |                                                           |
| <i>Astyanax mexicanus</i> (Am)                | tsr1      | -                    | LOC103027537     | full                   | -               | -                     | 1       | GCF_000372685.2               | -     | NW_019172941.1  | 420606-421679           | +            |                                                           |
| <i>Austrolotulus birmanus</i> (Ab)            | tsr1      | 5-HTR4-like          | XP_013863315.1   | full                   | -               | -                     | 1       | GCF_001266775.1               | -     | XM_034097861.1  | 225-1280                | +            |                                                           |
| <i>Baleophthalmus pectorosus</i> (Bp)         | tsr1      | 5-HTR4-like          | XP_029786106.1   | full                   | -               | -                     | 1       | GCF_000788275.1               | -     | NW_018356255.1  | 3197707-3198265         | +            |                                                           |
| <i>Cybaeus harengus</i> (Ch)                  | tsr1      | -                    | LOC105903878     | full                   | -               | -                     | 1       | GCF_000966335.1               | -     | NW_012221853.1  | 1367956-1369011         | +            |                                                           |
| <i>Cottus rhenanus</i> (Cr)                   | tsr1      | -                    | -                | full                   | -               | -                     | 1       | GCA_001455555.1               | -     | LKTN01076329.1  | 4308-5405               | +            |                                                           |
| <i>Cynoglossus semilaevis</i> (Cs)            | tsr1      | 5-HTR4-like          | XP_008315345.1   | full                   | -               | -                     | 1       | GCF_000523025.1               | 9     | NC_024315.1     | 9847779-9848852         | +            |                                                           |
| <i>Cyprinodon nevaldensis pectoralis</i> (Cn) | tsr1      | -                    | -                | full                   | -               | -                     | 1       | GCA_000778015.1               | -     | JSU0101003036.1 | 31440-32498             | -            |                                                           |
| <i>Cyprinodon variegatus</i> (Cv)             | tsr1      | 5-HTR4-like          | XP_015228425.1   | full                   | -               | -                     | 1       | GCF_000722565.1               | -     | NW_015165331.1  | 783289-784344           | -            |                                                           |
| <i>Cyprinus carpio</i> (Cc)                   | tsr1a     | -                    | LOC109060000     | full                   | Ψ               | 1!                    | 1       | GCF_000951615.1               | -     | NW_017538292.1  | 209579-210642           | -            |                                                           |
| <i>Cyprinus carpio</i> (Cc)                   | tsr1b     | -                    | LOC109061621     | full                   | Ψ               | 1!                    | 1       | GCF_000951615.1               | -     | NW_017538179.2  | 182099-183163           | -            |                                                           |
| <i>Danio rerio</i> (Dr)                       | tsr1      | 5-HTR4-like          | XP_001337671.1   | full                   | -               | -                     | 1       | GCF_000200235.1               | 1     | NC_037112.1     | 4194921-41950379        | +            |                                                           |
| <i>Dicertrachius labrax</i> (Dl)              | tsr1      | -                    | -                | full                   | -               | -                     | 1       | GCA_000689215.1               | -     | HG916847.1      | 18587864-18588940       | +            |                                                           |
| <i>Esox lucius</i> (El)                       | tsr1      | -                    | LOC105021074     | full                   | -               | -                     | 1       | GCF_000721915.3               | -     | NC_025992.3     | 3614001-3615086         | +            |                                                           |
| <i>Esox lucius</i> (El)                       | tsr2      | 5-HTR4-like          | XP_010900554.1   | full                   | -               | -                     | 1       | GCF_000721915.3               | -     | NC_025971.3     | 13319582-13320742       | +            |                                                           |
| <i>Fundulus heteroclitus</i> (Fh)             | tsr1      | TAAR3-like           | XP_012733128.2   | full                   | -               | -                     | 1       | GCF_000826765.1               | -     | NW_012234461.1  | 109571-110629           | +            |                                                           |
| <i>Gadus morhua</i> (Gm)                      | tsr1a     | -                    | -                | full                   | -               | -                     | 1       | GCF_002167405.1               | 3     | NC_044600.1     | 10445555-10444476       | -            |                                                           |
| <i>Gadus morhua</i> (Gm)                      | tsr1b     | -                    | -                | full                   | -               | -                     | 1       | WGS_VDB//GAE402               | -     | GAE4020003534.1 | 423215-428181           | +            | not in GCF_902167405.1                                    |
| <i>Gasterosteus aculeatus</i> (Ga)            | tsr1      | -                    | -                | full                   | -               | -                     | 1       | GCA_000180675.1               | -     | AANH01003210.1  | 55278-56352             | +            |                                                           |
| <i>Haplochromis burtoni</i> (Hb)              | tsr1      | 5-HTR4-like          | XP_005928396.2   | full                   | -               | -                     | 1       | GCF_000239415.1               | -     | NW_005179495.1  | 110901-111977           | +            |                                                           |
| <i>Hippocampus comes</i> (Hc)                 | tsr1      | 5-HTR4-like          | XP_019732039.1   | full                   | -               | -                     | 1       | GCF_001891065.1               | -     | NW_017805497.1  | 3571388-3572455         | +            |                                                           |
| <i>Ictalurus punctatus</i> (Ip)               | tsr1      | -                    | LOC108260501     | full                   | -               | -                     | 1       | GCF_001650625.1               | 29    | NC_030444.1     | 13728150-13729223       | +            |                                                           |
| <i>Kryptolebias marmoratus</i> (Km)           | tsr1      | -                    | -                | full                   | -               | -                     | 1       | ASH16495.71                   | -     | NW_016194240.1  | 1902656-1909314         | +            |                                                           |
| <i>Labrus bergyllia</i> (Lb)                  | tsr1      | -                    | LOC109941211     | full                   | -               | -                     | 1       | GCF_000080235.1               | -     | NW_018114694.1  | 280280-281356           | +            |                                                           |
| <i>Laimichthys crocea</i> (Lc)                | tsr1      | 5-HTR4               | XP_027138281.1   | full                   | -               | -                     | 1       | GCF_000972845.2               | X     | NC_040020.1     | 2591785-2592858         | +            |                                                           |
| <i>Lates calcarifer</i> (Lac)                 | tsr1      | 5-HTR4-like          | XP_018551385.1   | full                   | -               | -                     | 1       | GCF_001648065.1               | -     | NW_017365769.1  | 1510510-1511586         | +            |                                                           |
| <i>Lates calcarifer</i> (Lac)                 | tsr2      | -                    | -                | full                   | Ψ               | 1*                    | 1       | GCF_001648065.1               | -     | NW_017363881.1  | 4502697-4503698         | +            |                                                           |
| <i>Leposteus oculatus</i> (Lo)                | tsr1      | -                    | -                | full                   | -               | -                     | 1       | GCF_000242655.1               | LG4   | NC_023182.1     | 5486278-5407351         | +            |                                                           |
| <i>Leuciscus waleckii</i> (Lw)                | tsr1      | -                    | -                | full                   | Ψ               | 1!                    | 1       | GCA_000030235.1               | -     | FLSP03104869.1  | 10142941-10144067       | +            |                                                           |
| <i>Maylandia zebra</i> (Mz)                   | tsr1      | -                    | -                | full                   | -               | -                     | 1       | GCF_000238955.4               | -     | NC_036785       | 19082571-19083644       | +            |                                                           |
| <i>Mchenga conophoros</i> (Mc)                | tsr1      | -                    | -                | partial                | Ψ               | n.d.                  | n.d.    | GCA_000150855.1               | -     | ABP_01069830.1  | 456-773, 726-604        | +, -         |                                                           |
| <i>Micthys misy</i> (Mm)                      | tsr1      | -                    | -                | full                   | -               | -                     | 1       | GCA_001593715.1               | -     | JJSD01001024.1  | 6749-7822               | +            |                                                           |
| <i>Mola mola</i> (Mol)                        | tsr1      | -                    | -                | full                   | -               | -                     | 1       | GCA_001698575.1               | -     | KV751317.1      | 19347442-19348629       | +            |                                                           |
| <i>Monopterus albus</i> (Mo)                  | tsr1      | 5-HTR4-like          | XP_020457684.1   | full                   | -               | -                     | 1       | GCF_000195265.1               | -     | NW_018127934.1  | 1776181-1777257         | +            |                                                           |
| <i>Morone saxatilis</i> (Ms)                  | tsr1      | -                    | -                | full                   | -               | -                     | 1       | GCA_001663605.1               | -     | JTCL01023305.1  | 2572-3654               | +            |                                                           |
| <i>Neotampanolops brichardi</i> (Nb)          | tsr1      | 5-HTR4-like          | XP_006787601.1   | full                   | -               | -                     | 1       | GCF_000239395.1               | -     | NW_006272012.1  | 3793196-3794272         | +            |                                                           |
| <i>Notobranchius furzeri</i> (Nf)             | tsr1      | -                    | -                | full                   | -               | -                     | 1       | GCF_00145895.1                | sgf02 | NC_029650.1     | 83794088-83795149       | +            |                                                           |
| <i>Oreochromis niloticus</i> (On)             | tsr1      | 5-HTR4-like          | XP_025764064.1   | full                   | -               | -                     | 1       | GCF_001858045.2               | -     | NC_031971.2     | 20801250-20802326       | +            |                                                           |
| <i>Oryzias latipes</i> (Ol)                   | tsr1      | TAAR1-like           | XP_004085557.3   | full                   | -               | -                     | 1       | GCF_002234675.1               | 1     | NC_019659.2     | 14263830-14264918       | +            |                                                           |
| <i>Panopus argenteus</i> (Pa)                 | tsr1      | -                    | -                | full                   | -               | -                     | 1       | GCA_000697985.1               | -     | JHEK01029396.1  | 391-1470                | +            |                                                           |
| <i>Paralichthys olivacea</i> (Po)             | tsr1      | -                    | -                | full                   | -               | -                     | 1       | GCF_001970005.1               | -     | NW_01789678.1   | 2600450-2601526         | +            |                                                           |
| <i>Periphalmodon schlosseri</i> (Ps)          | tsr1      | -                    | -                | full                   | -               | -                     | 1       | GCA_000787055.1               | -     | JJCM01022706.1  | 42492-41431             | +            |                                                           |
| <i>Periphalmodon naguspinatus</i> (Pm)        | tsr1      | -                    | -                | full                   | -               | -                     | 1       | GCA_000787055.1               | -     | KH462927.1      | 37255-38383             | +            |                                                           |
| <i>Pimephales promelas</i> (Pp)               | tsr1      | -                    | -                | full                   | -               | -                     | 1       | GCA_00070825.1                | -     | JNCD01012483.1  | 34693-35757             | +            |                                                           |
| <i>Poecilia formosa</i> (Pf)                  | tsr1      | 5-HTR4-like          | XP_016526920.1   | full                   | -               | -                     | 1       | GCF_000485575.1               | -     | NW_006799983.1  | 1413491-1414549         | +            |                                                           |
| <i>Poecilia latipinna</i> (Pl)                | tsr1      | 5-HTR4-like          | XP_014889534.1   | full                   | -               | -                     | 1       | GCF_001443285.1               | -     | NW_015112902.1  | 147239-148297           | +            |                                                           |
| <i>Poecilia mexicana</i> (Pom)                | tsr1      | 5-HTR4-like          | XM_015004974.1   | full                   | -               | -                     | 1       | GCF_001443285.1               | -     | NW_015099551.1  | 360810-361865           | -            |                                                           |
| <i>Poecilia reticulata</i> (Pr)               | tsr1      | -                    | GeneID:103467537 | full                   | -               | -                     | 1       | GCF_000633615.1               | -     | NC_024331.1     | 20411752-20414810       | +            |                                                           |
| <i>Pseudopleuronectes yokohamae</i> (Py)      | tsr1      | -                    | -                | full                   | -               | -                     | 1       | GCA_000787555.1               | -     | BBOV01036133.1  | 602-1678                | -            |                                                           |
| <i>Pundamilia nyererei</i> (Pun)              | tsr1      | 5-HTR4-like          | XP_005741265.2   | full                   | -               | -                     | 1       | GCF_000239375.1               | -     | NW_005187508.1  | 23053-24129             | +            |                                                           |
| <i>Pygocentrus nattereri</i> (Pyn)            | tsr1      | -                    | LOC108443481     | full                   | -               | -                     | 1       | GCF_001682695.1               | -     | NW_016243911.1  | 1385121-1366194         | +            |                                                           |
| <i>Saimo salar</i> (Ss)                       | tsr1a     | -                    | -                | full                   | -               | -                     | 1       | GCF_000233375.1               | ssa04 | NC_027303.1     | 20922696-20923904       | +            |                                                           |
| <i>Saimo salar</i> (Ss)                       | tsr1b     | -                    | -                | full                   | Ψ               | 1*                    | 1       | GCF_000233375.1               | ssa08 | NC_027307.1     | 4286494-4287624         | +            |                                                           |
| <i>Saimo salar</i> (Ss)                       | tsr2      | -                    | -                | full                   | -               | -                     | 1       | GCF_000233375.1               | ssa09 | NC_027308.1     | 70306722-70307939       | +            |                                                           |
| <i>Scartelaos histophorus</i> (Sh)            | tsr1      | -                    | -                | full                   | -               | -                     | 1       | GCA_000787155.1               | -     | KN487589.1      | 9394-10455              | +            |                                                           |
| <i>Sceloporus formosus</i> (Sf)               | tsr1      | -                    | LOC108924382     | full                   | -               | -                     | 1       | GCF_001624265.1               | -     | NW_017371553.1  | 5548625-5549701         | +            |                                                           |
| <i>Sceloporus formosus</i> (Sf)               | tsr2      | TAAR9-like           | XP_018607201.1   | partial                | -               | -                     | 1       | GCF_001624265.1               | -     | NW_017371831.1  | 4523316-4524268         | +            |                                                           |
| <i>Sebastes aleutianus</i> (Seal)             | tsr1      | -                    | -                | full                   | -               | -                     | 1       | GCA_001910895.2               | -     | LHV501034712.1  | 8104-9174               | +            |                                                           |
| <i>Sebastes miniops</i> (Sem)                 | tsr1      | -                    | -                | full                   | -               | -                     | 1       | GCA_001910795.2               | -     | LHC301538447.1  | 455-1526                | +            |                                                           |
| <i>Sebastes nigricinctus</i> (Sni)            | tsr1      | -                    | -                | full                   | -               | -                     | 1       | GCA_000475235.3               | -     | AUPR02010153.1  | 9020-10090              | +            |                                                           |
| <i>Sebastes rubrivinctus</i> (Ser)            | tsr1      | -                    | -                | full                   | -               | -                     | 1       | GCA_000475215.1               | -     | KI458860.1      | 2786-3856               | +            |                                                           |
| <i>Sebastes steindachneri</i> (Ses)           | tsr1      | -                    | -                | full                   | -               | -                     | 1       | GCA_001910785.2               | -     | LCWK010889365.1 | 647-1717                | +            |                                                           |
| <i>Sinoocytocheilus anshulensis</i> (Sa)      | tsr1a     | 5-HTR4-like          | XP_016342958.1   | full                   | -               | -                     | 1       | GCF_001515665.1               | -     | NW_015640933.1  | 270706-271770           | +            |                                                           |
| <i>Sinoocytocheilus anshulensis</i> (Sa)      | tsr1b     | 5-HTR4-like          | XP_016334547.1   | full                   | -               | -                     | 1       | GCF_001515665.1               | -     | NW_015619744.1  | 1-879                   | +            |                                                           |
| <i>Sinoocytocheilus rhinocerosus</i> (Sr)     | tsr1a     | -                    | LOC107719773     | full                   | -               | -                     | 1       | GCF_001515625.1               | -     | NW_015656168.1  | 47289-48353             | +            |                                                           |
| <i>Sinoocytocheilus rhinocerosus</i> (Sr)     | tsr1b     | -                    | LOC107711518     | full                   | -               | -                     | 1       |                               |       |                 |                         |              |                                                           |

taar genes of jawed vertebrates identified in this study

| Species (Latin name and abbreviation) | Gene name | Automated annotation | Accession      | Length (full/partial) | Pseudo-gene (Y/N) | * stop; 1/frameshift | # exons | Database incl. Version number | Chromosome | Contig                            | Location in contig (bp) | Strand (+/-) | Comments                                    |
|---------------------------------------|-----------|----------------------|----------------|-----------------------|-------------------|----------------------|---------|-------------------------------|------------|-----------------------------------|-------------------------|--------------|---------------------------------------------|
| <b>Cartilaginous fish</b>             |           |                      |                |                       |                   |                      |         |                               |            |                                   |                         |              |                                             |
| <i>Callorhynchus milii</i> (Cm)       | taar-11a  | TAAR4-like           | XP_007897493.1 | full                  | ψ                 | 11 1*                | 1       | GCF_000165045.1               | -          | NW_006890121.1                    | 242855-243884           | +            |                                             |
| <i>Callorhynchus milii</i> (Cm)       | taar-11b  | TAAR2-like           | XP_007897495.1 | full                  | ψ                 | 21 1*                | 1       | GCF_000165045.1               | -          | NW_006890121.1                    | 28544-295945            | +            |                                             |
| <i>Callorhynchus milii</i> (Cm)       | taar-11c  | TAAR4-like           | XP_007897494.1 | full                  | -                 | -                    | 1       | GCF_000165045.1               | -          | NW_006890121.1                    | 248799-249827           | +            |                                             |
| <i>Leucoraja erinacea</i> (Le)        | taar-11a  | -                    | -              | full                  | -                 | -                    | 1       | WGS_VDB//AESE01               | -          | AESE011062060.1<br>AESE01002089.1 | 1-856, 26-502           | +            | not present in genome assembly              |
| <i>Rhinodon typos</i> (Rt)            | taar-11a  | TAAR4-like           | XP_020378973.1 | full                  | ψ                 | 11 1                 | 1       | GCF_001642345.1               | -          | NW_018045707.1                    | 45125-46162             | +            |                                             |
| <i>Rhinodon typos</i> (Rt)            | taar-11b  | TAAR4-like           | XP_020378971.1 | full                  | ψ                 | 21 2*                | 1       | GCF_001642345.1               | -          | NW_018045707.1                    | 21550-22701             | +            |                                             |
| <i>Rhinodon typos</i> (Rt)            | taar-11c  | TAAR4-like           | XP_020378970.1 | 5 partial             | -                 | -                    | 1       | GCF_001642345.1               | -          | NW_018045707.1                    | 66985-67908             | +            |                                             |
| <i>Rhinodon typos</i> (Rt)            | taar-11d  | TAAR4-like           | XP_020378972.1 | full                  | -                 | -                    | 1       | GCF_001642345.1               | -          | NW_018045707.1                    | 37597_38635             | +            |                                             |
| <b>Bony fish</b>                      |           |                      |                |                       |                   |                      |         |                               |            |                                   |                         |              |                                             |
| <i>Anguilla anguilla</i> (Aa)         | taar12a   | -                    | -              | full                  | -                 | -                    | 1       | GCA_000695075.1               | -          | AZBK01826618.1                    | 794-1840                | +            |                                             |
| <i>Anguilla anguilla</i> (Aa)         | taar12b   | -                    | -              | full                  | -                 | -                    | 2       | GCA_000695075.2               | -          | AZBK01826619.1                    | 1284-2473               | +            |                                             |
| <i>Anguilla anguilla</i> (Aa)         | taar12c   | -                    | -              | full                  | -                 | -                    | 1       | GCA_000695075.3               | -          | AZBK01826621.1                    | 5686-6632               | +            |                                             |
| <i>Anguilla anguilla</i> (Aa)         | taar12d   | -                    | -              | partial               | -                 | -                    | 1       | GCA_000695075.4               | -          | AZBK01826625.1                    | 2492                    | +            |                                             |
| <i>Anguilla anguilla</i> (Aa)         | taar12e   | -                    | -              | partial               | -                 | -                    | 1       | GCA_000695075.5               | -          | AZBK01503223.1                    | 12-566                  | +            |                                             |
| <i>Anguilla anguilla</i> (Aa)         | taar12f   | -                    | -              | full                  | -                 | -                    | 1       | GCA_000695075.6               | -          | AZBK01826622.1                    | 1234-2283               | +            |                                             |
| <i>Anguilla anguilla</i> (Aa)         | taar12g   | -                    | -              | partial               | -                 | -                    | 1       | GCA_000695075.7               | -          | AZBK01826620.1                    | 2-835                   | +            |                                             |
| <i>Anguilla anguilla</i> (Aa)         | taar13a   | -                    | -              | partial               | -                 | -                    | 1       | GCA_000695075.1               | -          | AZBK01826618.1                    | 9792-10505              | -            |                                             |
| <i>Anguilla anguilla</i> (Aa)         | taar13b   | -                    | -              | full                  | -                 | -                    | 1       | GCA_000695075.1               | -          | AZBK01826618.1                    | 6365-7402               | -            |                                             |
| <i>Anguilla anguilla</i> (Aa)         | taar13c   | -                    | -              | partial               | -                 | -                    | 1       | GCA_000695075.1               | -          | AZBK01826606.1                    | 1-714                   | -            |                                             |
| <i>Anguilla anguilla</i> (Aa)         | taar13d   | -                    | -              | partial               | -                 | -                    | 1       | GCA_000695075.1               | -          | AZBK01826618.1                    | 4358-5953               | -            |                                             |
| <i>Anguilla anguilla</i> (Aa)         | taar13e   | -                    | -              | full                  | -                 | -                    | 1       | GCA_000695075.1               | -          | AZBK01826603.1                    | 2-1024                  | -            |                                             |
| <i>Anoplopoma fimbria</i> (Af)        | taar13a   | -                    | -              | full                  | -                 | -                    | 1       | GCA_000499045.1               | -          | AWGY01187787.1                    | 907-1842                | +            |                                             |
| <i>Anoplopoma fimbria</i> (Af)        | taar13b   | -                    | -              | partial               | -                 | -                    | 1       | GCA_000499045.1               | -          | AWGY01171310.1                    | 3-785                   | -            |                                             |
| <i>Anguilla japonica</i> (Aj)         | taar12a   | -                    | -              | full                  | -                 | -                    | 1       | GCA_003597225.1               | LG19       | BEWY01000019.1                    | 10043670-10044719       | +            |                                             |
| <i>Anguilla japonica</i> (Aj)         | taar12b   | -                    | -              | full                  | -                 | -                    | 1       | GCA_003597225.1               | LG19       | BEWY01000019.1                    | 10038585-10039640       | +            |                                             |
| <i>Anguilla japonica</i> (Aj)         | taar12c   | -                    | -              | full                  | -                 | -                    | 1       | GCA_003597225.1               | LG19       | BEWY01000019.1                    | 10023900-10024949       | +            |                                             |
| <i>Anguilla japonica</i> (Aj)         | taar12d   | -                    | -              | full                  | -                 | -                    | 1       | GCA_003597225.1               | LG19       | BEWY01000019.1                    | 10006478-10007524       | +            |                                             |
| <i>Anguilla japonica</i> (Aj)         | taar12e   | -                    | -              | full                  | -                 | -                    | 1       | GCA_003597225.1               | LG19       | BEWY01000019.1                    | 9993887-9994913         | +            |                                             |
| <i>Anguilla japonica</i> (Aj)         | taar12f   | -                    | -              | full                  | -                 | -                    | 1       | GCA_003597225.1               | LG19       | BEWY01000019.1                    | 9986347-9987383         | +            |                                             |
| <i>Anguilla japonica</i> (Aj)         | taar12g   | -                    | -              | full                  | -                 | -                    | 1       | GCA_003597225.1               | LG19       | BEWY01000019.1                    | 10033303-10034355       | +            |                                             |
| <i>Anguilla japonica</i> (Aj)         | taar12h   | -                    | -              | full                  | -                 | -                    | 1       | GCA_003597225.1               | LG19       | BEWY01000019.1                    | 9977289-9978401         | +            | genomic sequence has 1 aa difference to WGS |
| <i>Anguilla japonica</i> (Aj)         | taar12i   | -                    | -              | full                  | -                 | -                    | 1       | GCA_003597225.1               | LG19       | BEWY01000019.1                    | 10001006-10002058       | +            |                                             |
| <i>Anguilla japonica</i> (Aj)         | taar13a   | -                    | -              | full                  | -                 | -                    | 1       | WGS_VDB//JAVPY01              | -          | AVPY01144813.1                    | 1202-262                | -            | not present in genome assembly              |
| <i>Anguilla japonica</i> (Aj)         | taar13b1  | -                    | -              | full                  | ψ                 | 11 1                 | 1       | GCA_003597225.1               | LG19       | BEWY01000019.1                    | 10053840-10052801       | -            | genomic sequence has 4 aa difference to WGS |
| <i>Anguilla japonica</i> (Aj)         | taar13c   | -                    | -              | full                  | -                 | -                    | 1       | GCA_003597225.1               | LG19       | BEWY01000019.1                    | 10050453-10049413       | +            |                                             |
| <i>Anguilla japonica</i> (Aj)         | taar13d   | -                    | -              | partial               | -                 | -                    | 1       | GCA_003597225.1               | LG19       | BEWY01000019.1                    | 10072929-10073579       | +            |                                             |
| <i>Anguilla japonica</i> (Aj)         | taar13d1  | -                    | -              | partial               | -                 | -                    | 1       | WGS_VDB//JAVPY01              | -          | AVPY01144817.1                    | 3-797                   | +            | pseudogene in genomic database              |
| <i>Anguilla japonica</i> (Aj)         | taar13d2  | -                    | -              | full                  | -                 | -                    | 1       | GCA_003597225.1               | LG19       | BEWY01000019.1                    | 10063062-10064087       | +            |                                             |
| <i>Anguilla japonica</i> (Aj)         | taar13e   | -                    | -              | full                  | -                 | -                    | 1       | GCA_003597225.1               | LG19       | BEWY01000019.1                    | 10078261-10079310       | +            |                                             |
| <i>Anguilla japonica</i> (Aj)         | taar13f   | -                    | -              | partial               | -                 | -                    | 1       | GCA_003597225.1               | LG19       | BEWY01000019.1                    | 10070326-10071114       | +            | genomic sequence has 4 aa difference to WGS |
| <i>Anguilla japonica</i> (Aj)         | taar13g   | -                    | -              | full                  | -                 | -                    | 1       | GCA_003597225.1               | LG19       | BEWY01000019.1                    | 10066035-10067006       | +            | genomic sequence has 4 aa difference to WGS |
| <i>Astyanax mexicanus</i> (Am)        | taar12a   | TAAR4-like           | XP_015463987.2 | full                  | -                 | -                    | 1       | GCF_000372685.2               | 3          | NC_035899.1                       | 39668818-39669713       | +            |                                             |
| <i>Astyanax mexicanus</i> (Am)        | taar12b   | TAAR4-like           | XP_015463989.2 | full                  | -                 | -                    | 1       | GCF_000372685.2               | 3          | NC_035899.1                       | 39667005-39666971       | -            |                                             |
| <i>Astyanax mexicanus</i> (Am)        | taar12c   | TAAR4-like           | XP_007259911.2 | full                  | -                 | -                    | 1       | GCF_000372685.2               | 3          | NC_035899.1                       | 39661121-39662152       | -            |                                             |
| <i>Astyanax mexicanus</i> (Am)        | taar13a   | TAAR13c-like         | XP_015463986.2 | full                  | -                 | -                    | 1       | GCF_000372685.2               | 3          | NC_035899.1                       | 39656351-39657388       | +            |                                             |
| <i>Anguilla rostrata</i> (Ar)         | taar12a   | -                    | -              | full                  | -                 | -                    | 1       | WGS_VDB//JLTYT01              | -          | LTYT01001697.1                    | 195538-195687           | -            |                                             |
| <i>Anguilla rostrata</i> (Ar)         | taar12b   | -                    | -              | full                  | -                 | -                    | 1       | WGS_VDB//JLTYT01              | -          | LTYT01001697.1                    | 200565-201620           | -            |                                             |
| <i>Anguilla rostrata</i> (Ar)         | taar12c   | -                    | -              | full                  | -                 | -                    | 1       | WGS_VDB//JLTYT01              | -          | LTYT01001697.1                    | 228169-229218           | -            |                                             |
| <i>Anguilla rostrata</i> (Ar)         | taar12d   | -                    | -              | partial               | -                 | -                    | 1       | WGS_VDB//JLTYT01              | -          | LTYT01007895.1                    | 31310-32080             | +            |                                             |
| <i>Anguilla rostrata</i> (Ar)         | taar12e   | -                    | -              | full                  | -                 | -                    | 1       | WGS_VDB//JLTYT01              | -          | LTYT01007895.1                    | 15225-16259             | +            |                                             |
| <i>Anguilla rostrata</i> (Ar)         | taar12f   | -                    | -              | full                  | -                 | -                    | 1       | WGS_VDB//JLTYT01              | -          | LTYT01007895.1                    | 9659-10705              | +            |                                             |
| <i>Anguilla rostrata</i> (Ar)         | taar12g1  | -                    | -              | full                  | -                 | -                    | 1       | WGS_VDB//JLTYT01              | -          | LTYT01007895.1                    | 3930-4976               | +            |                                             |
| <i>Anguilla rostrata</i> (Ar)         | taar12g2  | -                    | -              | partial               | -                 | -                    | 1       | WGS_VDB//JLTYT01              | -          | LTYT01007895.1                    | 3-749                   | +            |                                             |
| <i>Anguilla rostrata</i> (Ar)         | taar12h   | -                    | -              | full                  | -                 | -                    | 1       | WGS_VDB//JLTYT01              | -          | LTYT01006975.1                    | 1393-2504               | +            |                                             |
| <i>Anguilla rostrata</i> (Ar)         | taar12i   | -                    | -              | full                  | -                 | -                    | 1       | WGS_VDB//JLTYT01              | -          | LTYT01007895.1                    | 19379-20431             | +            |                                             |
| <i>Anguilla rostrata</i> (Ar)         | taar12j   | -                    | -              | full                  | -                 | -                    | 1       | WGS_VDB//JLTYT01              | -          | LTYT01001697.1                    | 232505-233554           | +            |                                             |
| <i>Anguilla rostrata</i> (Ar)         | taar12k   | -                    | -              | full                  | -                 | -                    | 1       | WGS_VDB//JLTYT01              | -          | LTYT01007895.1                    | 34780-35829             | +            |                                             |
| <i>Anguilla rostrata</i> (Ar)         | taar12l   | -                    | -              | full                  | -                 | -                    | 1       | WGS_VDB//JLTYT01              | -          | LTYT01007895.1                    | 30123-31163             | +            |                                             |
| <i>Anguilla rostrata</i> (Ar)         | taar13a   | -                    | -              | full                  | -                 | -                    | 1       | WGS_VDB//JLTYT01              | -          | LTYT01001697.1                    | 184810-185850           | +            |                                             |
| <i>Anguilla rostrata</i> (Ar)         | taar13b1  | -                    | -              | full                  | -                 | -                    | 1       | WGS_VDB//JLTYT01              | -          | LTYT01001697.1                    | 190058-191098           | +            |                                             |
| <i>Anguilla rostrata</i> (Ar)         | taar13b2  | -                    | -              | full                  | -                 | -                    | 1       | WGS_VDB//JLTYT01              | -          | LTYT01001697.1                    | 181376-182415           | +            |                                             |
| <i>Anguilla rostrata</i> (Ar)         | taar13c   | -                    | -              | full                  | -                 | -                    | 1       | WGS_VDB//JLTYT01              | -          | LTYT01001697.1                    | 162511-163561           | +            |                                             |
| <i>Anguilla rostrata</i> (Ar)         | taar13d1  | -                    | -              | full                  | -                 | -                    | 1       | WGS_VDB//JLTYT01              | -          | LTYT01001697.1                    | 170738-171778           | +            |                                             |
| <i>Anguilla rostrata</i> (Ar)         | taar13d2  | -                    | -              | full                  | -                 | -                    | 1       | WGS_VDB//JLTYT01              | -          | LTYT01001697.1                    | 174330-175364           | +            |                                             |
| <i>Anguilla rostrata</i> (Ar)         | taar13e   | -                    | -              | full                  | -                 | -                    | 1       | WGS_VDB//JLTYT01              | -          | LTYT01001697.1                    | 156645-157697           | +            |                                             |
| <i>Anguilla rostrata</i> (Ar)         | taar13f   | -                    | -              | full                  | -                 | -                    | 1       | WGS_VDB//JLTYT01              | -          | LTYT01001697.1                    | 167001-168050           | +            |                                             |
| <i>Cyprinus carpio</i> (Cc)           | taar12a   | TAAR4-like           | XP_018959267.1 | full                  | -                 | -                    | 1       | GCF_000951615.1               | 9          | NC_031705.1                       | 15759007-15760075       | -            |                                             |
| <i>Cyprinus carpio</i> (Cc)           | taar12b   | TAAR4-like           | XP_018959263.1 | full                  | -                 | -                    | 1       | GCF_000951615.1               | 9          | NC_031705.1                       | 15752901-15753935       | -            |                                             |
| <i>Cyprinus carpio</i> (Cc)           | taar12c   | -                    | -              | full                  | -                 | -                    | 1       | WGS_VDB//LHQP01               | LG19       | LHQP01000012.1                    | 15916-14771             | -            | pseudogene in genomic database              |
| <i>Cyprinus carpio</i> (Cc)           | taar12d   | -                    | -              | full                  | ψ                 | 11 1*                | 1       | GCF_000951615.1               | 9          | NC_031705.1                       | 15764519-15764995       | -            |                                             |
| <i>Cyprinus carpio</i> (Cc)           | taar12e   | TAAR4-like           | XP_018975893.1 | full                  | -                 | -                    | 1       | GCF_000951615.1               | 33         | NC_031729.1                       | 11068745-11069761       | -            |                                             |
| <i>Cyprinus carpio</i> (Cc)           | taar12f   | TAAR4-like           | XP_018961602.1 | full                  | -                 | -                    | 1       | GCF_000951615.1               | 12         | NC_031708.1                       | 6966749-6967759         | +            |                                             |
| <i>Cyprinus carpio</i> (Cc)           | taar12g   | TAAR4-like           | XP_018946046.1 | full                  | -                 | -                    | 1       | WGS_VDB//LHQP01               | -          | LHQP01033775.1                    | 15629-16645             | -            | not present in genome assembly              |
| <i>Cyprinus carpio</i> (Cc)           | taar12h   | TAAR4-like           | XP_018946046.1 | full                  | -                 | -                    | 1       | GCF_000951615.1               | -          | NW_01754984.1                     | 74868-75904             | +            |                                             |
| <i>Cyprinus carpio</i> (Cc)           | taar12i   | TAAR3-like           | XP_018959120.1 | full                  | -                 | -                    | 1       | GCF_000951615.1               | -          | NW_01754985.1                     | 8783-9934               | +            |                                             |
| <i>Cyprinus carpio</i> (Cc)           | taar12j   | TAAR4-like           | XP_018946046.1 | partial               | ψ                 | 11 1*                | 1       | WGS_VDB//SAUK01               | -          | SAUK01000530.1                    | 33619-32874             | -            | not present in genome assembly              |
| <i>Cyprinus carpio</i> (Cc)           | taar12k   | TAAR4-like           | XP_018961608.1 | full                  | -                 | -                    | 1       | GCF_000951615.1               | 12         | NC_031708.1                       | 6978116-6979132         | +            |                                             |
| <i>Cyprinus carpio</i> (Cc)           | taar12l   | TAAR4-like           | XP_018946046.1 | full                  | -                 | -                    | 1       | WGS_VDB//LHQP01               | -          | LHQP01000568.1                    | 15-1055-11684           | -            | not present in genome assembly              |
| <i>Cyprinus carpio</i> (Cc)           | taar12m   | TAAR4-like           | XP_018961603.1 | full                  | -                 | -                    | 1       | GCF_000951615.1               | 12         | NC_031708.1                       | 6988431-6988447         | +            |                                             |
| <i>Cyprinus carpio</i> (Cc)           | taar12n   | TAAR4-like           | XP_018941218.1 | full                  | -                 | -                    | 1       | GCF_000951615.1               | -          | NW_017539046.1                    | 750-1802                | -            |                                             |
| <i>Cyprinus carpio</i> (Cc)           | taar12o   | -                    | -              | partial               | -                 | -                    | 1       | GCF_000951615.1               | 12         | NC_031708.1                       | 6944320-6944459         | +            |                                             |
| <i>Cyprinus carpio</i> (Cc)           | taar13a   | TAAR13c-like         | XP_018959962.1 | full                  | -                 | -                    | 1       | GCF_000951615.1               | 2          | NC_031698.1                       | 8856169-8857456         | +            |                                             |
| <i>Cyprinus carpio</i> (Cc)           | taar13b   | TAAR13c-like         | XP_018959967.1 | full                  | -                 | -                    | 1       | GCF_000951615.1               | 2          | NC_031698.1                       | 8860794-8861813         | +            |                                             |
| <i>Cyprinus carpio</i> (Cc)           | taar13c   | TAAR13c              | XP_018932792.1 | full                  | -                 | -                    | 1       | GCF_000951615.1               | -          | NW_017538119.1                    | 334753-335778           | +            |                                             |
| <i>Cyprinus carpio</i> (Cc)           | taar13d   | TAAR13c-like         | XP_018932791.1 | full                  | -                 | -                    | 1       | GCF_000951615.1               | -          | NW_017538119.1                    | 332109-333113           | +            |                                             |
| <i>Cyprinus carpio</i> (Cc)           | taar13e   | -                    | -              | partial               | -                 | -                    | 1       | GCF_000951615.1               | 7          | NC_031703.1                       | 4705416-4706438         | +            |                                             |
| <i>Clupea harengus</i> (Ch)           | taar13a   | taar2                | XP_012683945.1 | full                  | -                 | -                    | 1       | GCF_000966335.1               | -          | NW_012218207.1                    | 76993-78006             | -            |                                             |
| <i>Diceranchorus labrax</i> (Dl)      | taar13a   | -                    | -              | full                  | -                 | -                    | 1       | GCA_000689215.1               | -          | HCB18851.1                        | 95392926-95393909       | +            |                                             |

|                                          |            |              |                |         |   |      |      |                 |       |                                             |                   |   |
|------------------------------------------|------------|--------------|----------------|---------|---|------|------|-----------------|-------|---------------------------------------------|-------------------|---|
| <i>Lepidosteus oculatus</i> (Lo)         | taar5-like | -            | -              | full    | - | -    | 1    | GCF_000242995.1 | LG1   | NC_023179.1                                 | 69059546-69060574 | + |
| <i>Leuciscus waleckii</i> (Lw)           | taar12a    | -            | -              | full    | ψ | ZI   | 1    | GCA_900092035.1 | -     | FLSR01004880.1                              | 3072502-3073642   | - |
| <i>Leuciscus waleckii</i> (Lw)           | taar13a    | -            | -              | full    | ψ | II   | 1    | GCA_900092035.1 | -     | FLSR01000467.1                              | 1995-2945         | - |
| <i>Leuciscus waleckii</i> (Lw)           | taar13b    | -            | -              | full    | ψ | II   | 1    | GCA_900092035.1 | -     | FLSR01000467.1                              | 10828-11851       | - |
| <i>Morone saxatilis</i> (Ms)             | taar13a    | -            | -              | partial | - | -    | 1    | GCA_001663605.1 | -     | JTCL01016091.1                              | 18020-18655       | - |
| <i>Pimephales promelas</i> (Pp)          | taar12a    | -            | -              | partial | - | -    | 1    | GCA_000700825.1 | -     | JNCDD01017678.1                             | 86739-87671       | - |
| <i>Pimephales promelas</i> (Pp)          | taar12b    | -            | -              | partial | - | -    | 1    | GCA_000700825.1 | -     | JNCDD002744.1                               | 122449-123246     | - |
| <i>Pimephales promelas</i> (Pp)          | taar12c    | -            | -              | full    | - | -    | 1    | GCA_000700825.1 | -     | JNCDD01017678.1                             | 29732-30802       | - |
| <i>Pimephales promelas</i> (Pp)          | taar12d    | -            | -              | full    | - | -    | 1    | GCA_000700825.1 | -     | JNCDD01017678.1                             | 69609-89748       | - |
| <i>Pimephales promelas</i> (Pp)          | taar12e    | -            | -              | full    | - | -    | 1    | GCA_000700825.1 | -     | JNCDD01017678.1                             | 21261-22409       | - |
| <i>Pimephales promelas</i> (Pp)          | taar13a    | -            | -              | full    | - | -    | 1    | GCA_000700825.1 | -     | JNCDD0104450.1                              | 57751-58776       | - |
| <i>Pimephales promelas</i> (Pp)          | taar13b    | -            | -              | full    | - | -    | 1    | GCA_000700825.2 | -     | JNCDD01017678.1                             | 6857-7882         | + |
| <i>Pygocentrus nattereri</i> (Pyn)       | taar12a    | TAAR4-like   | XP_017562409.1 | full    | - | -    | 1    | GCF_001682695.1 | -     | NW_016243879.1                              | 1733682-1734725   | + |
| <i>Pygocentrus nattereri</i> (Pyn)       | taar12b    | TAAR4-like   | XP_017562407.1 | full    | - | -    | 1    | GCF_001682695.1 | -     | NW_016243879.1                              | 1718560-1719591   | + |
| <i>Pygocentrus nattereri</i> (Pyn)       | taar12c    | TAAR4-like   | XP_017562408.1 | full    | - | -    | 1    | GCF_001682695.1 | -     | NW_016243879.1                              | 1729237-1730268   | + |
| <i>Pygocentrus nattereri</i> (Pyn)       | taar12d    | TAAR3-like   | XP_017562412.1 | full    | - | -    | 1    | GCF_001682695.1 | -     | NW_016243879.1                              | 1737731-1738762   | + |
| <i>Pygocentrus nattereri</i> (Pyn)       | taar12e    | TAAR4-like   | XP_017562414.1 | full    | - | -    | 1    | GCF_001682695.1 | -     | NW_016243879.1                              | 1747895-1748920   | + |
| <i>Pygocentrus nattereri</i> (Pyn)       | taar13a    | TAAR13c-like | XP_017562388.1 | full    | - | -    | 1    | GCF_001682695.1 | -     | NW_016243879.1                              | 1758494-1759543   | + |
| <i>Pygocentrus nattereri</i> (Pyn)       | taar13b    | TAAR13c-like | XP_017562390.1 | full    | - | -    | 1    | GCF_001682695.1 | -     | NW_016243879.1                              | 1774862-1775911   | + |
| <i>Pygocentrus nattereri</i> (Pyn)       | taar13c    | TAAR13c-like | XP_017562387.1 | full    | - | -    | 1    | GCF_001682695.1 | -     | NW_016243879.1                              | 1751534-1752583   | + |
| <i>Pygocentrus nattereri</i> (Pyn)       | taar13d    | TAAR13c-like | XP_017562389.1 | full    | - | -    | 1    | GCF_001682695.1 | -     | NW_016243879.1                              | 1766788-1767837   | + |
| <i>Salmo salar</i> (Ss)                  | taar13a    | -            | -              | full    | - | -    | 1    | GCF_000233375.1 | ssa15 | NC_027314.1                                 | 30597459-30598328 | - |
| <i>Salmo salar</i> (Ss)                  | taar13b    | -            | -              | full    | ψ | II   | 2    | GCF_000233375.1 | ssa15 | NC_027314.1                                 | 30597304-30598328 | - |
| <i>Salmo salar</i> (Ss)                  | taar13c    | -            | -              | full    | - | -    | 1    | GCF_000233375.1 | ssa15 | NC_027314.1                                 | 30655257-30660219 | - |
| <i>Sebastes aleutianus</i> (Sea)         | taar13a    | -            | -              | full    | - | -    | 1    | GCA_001910805.2 | -     | LHV501040848.1                              | 11319-12383       | - |
| <i>Sebastes aleutianus</i> (Sea)         | taar13b    | -            | -              | partial | - | -    | 1    | GCA_001910805.2 | -     | LHV501040851.1                              | 3-641             | - |
| <i>Sebastes aleutianus</i> (Sea)         | taar13c    | -            | -              | full    | ψ | ZI   | 1    | GCA_001910805.2 | -     | LHV501040852.1                              | 3-602             | - |
| <i>Sebastes minor</i> (Sem)              | taar13a    | -            | -              | full    | - | -    | 1    | GCA_001910765.2 | -     | LHC301837248.1                              | 2-574             | - |
| <i>Sebastes minor</i> (Sem)              | taar13b    | -            | -              | partial | - | -    | 1    | GCA_001910765.2 | -     | LHC301837248.1                              | 203-574           | - |
| <i>Sebastes rubrivinctus</i> (Ser)       | taar13a    | -            | -              | full    | - | -    | 1    | GCA_000475215.1 | -     | AUPQ01075218.1                              | 1668-2732         | + |
| <i>Sebastes rubrivinctus</i> (Ser)       | taar13b    | -            | -              | partial | - | -    | 1    | GCA_000475215.1 | -     | AUPQ01038002.1                              | 908-3             | - |
| <i>Sebastes nigrocinctus</i> (Sn)        | taar13a    | -            | -              | full    | - | -    | 1    | GCA_000475235.3 | -     | AUPR02083636.1                              | 12257-13321       | - |
| <i>Sebastes stendachneri</i> (Ses)       | taar13a    | -            | -              | partial | - | -    | n.d. | GCA_001910785.2 | -     | LCWK010354496.1; LCV1-1441-114-2-256; 3-107 | +                 |   |
| <i>Scleropages formosus</i> (Sf)         | taar13a    | TAAR13c-like | XP_018599052.1 | full    | - | -    | 1    | ASM162426v1     | -     | NW_017371616.1                              | 39141-40175       | + |
| <i>Scleropages formosus</i> (Sf)         | taar13b    | -            | -              | full    | ψ | II   | 1    | LOC108929171    | -     | NW_017371616.1                              | 51463-52507       | + |
| <i>Scleropages formosus</i> (Sf)         | taar13c    | TAAR13c-like | XP_018599050.1 | full    | - | -    | 1    | ASM162426v1     | -     | NW_017371616.1                              | 25892-26926       | + |
| <i>Scleropages formosus</i> (Sf)         | taar13d    | -            | -              | full    | ψ | II   | 1    | LOC108929166    | -     | NW_017371616.1                              | 18411-19305       | + |
| <i>Sinocyclocheilus anshuiensis</i> (Sa) | taar12a    | TAAR4-like   | XP_016353209.1 | full    | - | -    | 1    | GCF_001515605.1 | -     | NW_015544213.1                              | 2578639-2579658   | - |
| <i>Sinocyclocheilus anshuiensis</i> (Sa) | taar12b    | TAAR4-like   | XP_016353208.1 | full    | - | -    | 2    | GCF_001515605.1 | -     | NW_015544213.1                              | 2575897-2576889   | - |
| <i>Sinocyclocheilus anshuiensis</i> (Sa) | taar12c    | -            | -              | full    | ψ | II   | 1    | GCF_001515605.1 | -     | NW_015544213.1                              | 2616124-2617023   | - |
| <i>Sinocyclocheilus anshuiensis</i> (Sa) | taar12d    | TAAR4-like   | XP_016353229.1 | full    | - | -    | 1    | GCF_001515605.1 | -     | NW_015544213.1                              | 2611370-2612386   | - |
| <i>Sinocyclocheilus anshuiensis</i> (Sa) | taar13a    | TAAR13c-like | XP_016353236.1 | full    | - | -    | 1    | GCF_001515605.1 | -     | NW_015544213.1                              | 2664594-2665619   | + |
| <i>Sinocyclocheilus anshuiensis</i> (Sa) | taar13b    | -            | -              | partial | ψ | I*   | 1    | LOC107685375    | -     | NW_015539878.1                              | 409227-409793     | + |
| <i>Sinocyclocheilus anshuiensis</i> (Sa) | taar13c    | TAAR13c      | XP_016337433.1 | full    | - | -    | 1    | GCF_001515605.1 | -     | NW_015539878.1                              | 412165-413187     | - |
| <i>Sinocyclocheilus anshuiensis</i> (Sa) | taar13d    | TAAR13c-like | XP_016353237.1 | full    | - | -    | 1    | GCF_001515605.1 | -     | NW_015544213.1                              | 2667473-2668498   | + |
| <i>Sinocyclocheilus anshuiensis</i> (Sa) | taar13e    | TAAR13c-like | XP_016353238.1 | full    | - | -    | 1    | GCF_001515605.1 | -     | NW_015544213.1                              | 2670779-2671801   | + |
| <i>Sinocyclocheilus grahami</i> (Sg)     | taar12a    | TAAR4-like   | XP_016087126.1 | full    | - | -    | 1    | GCF_001515645.1 | -     | NW_015505576.1                              | 896804-897832     | + |
| <i>Sinocyclocheilus grahami</i> (Sg)     | taar12b    | TAAR4-like   | XP_016087127.1 | full    | - | -    | 1    | GCF_001515645.1 | -     | NW_015505576.1                              | 902334-903362     | + |
| <i>Sinocyclocheilus grahami</i> (Sg)     | taar12c    | TAAR4-like   | XP_016087138.1 | full    | - | -    | 1    | GCF_001515645.1 | -     | NW_015505576.1                              | 871953-872987     | + |
| <i>Sinocyclocheilus grahami</i> (Sg)     | taar12d    | TAAR4-like   | XP_016087141.1 | full    | - | -    | 1    | GCF_001515645.1 | -     | NW_015505576.1                              | 874541-875557     | + |
| <i>Sinocyclocheilus grahami</i> (Sg)     | taar12e    | TAAR4-like   | XP_016087140.1 | full    | - | -    | 1    | GCF_001515645.1 | -     | NW_015505576.1                              | 882475-883491     | + |
| <i>Sinocyclocheilus grahami</i> (Sg)     | taar12f    | TAAR4-like   | XP_016087142.1 | full    | - | -    | 1    | GCF_001515645.1 | -     | NW_015505576.1                              | 891479-892504     | + |
| <i>Sinocyclocheilus grahami</i> (Sg)     | taar13a    | TAAR13c-like | XP_016087134.1 | full    | - | -    | 1    | GCF_001515645.1 | -     | NW_015505576.1                              | 810574-811599     | - |
| <i>Sinocyclocheilus grahami</i> (Sg)     | taar13b    | -            | -              | partial | ψ | ZI1* | 1    | LOC107593282    | -     | NW_015505347.1                              | 359338-359967     | + |
| <i>Sinocyclocheilus grahami</i> (Sg)     | taar13c    | TAAR13c      | XP_016138370.1 | full    | - | -    | 1    | GCF_001515645.1 | -     | NW_015505347.1                              | 354967-355989     | + |
| <i>Sinocyclocheilus grahami</i> (Sg)     | taar13d    | TAAR13c-like | XP_016087133.1 | full    | - | -    | 1    | GCF_001515645.1 | -     | NW_015505576.1                              | 805830-806855     | - |
| <i>Sinocyclocheilus grahami</i> (Sg)     | taar13e    | TAAR13c-like | XP_016087132.1 | full    | - | -    | 1    | GCF_001515645.1 | -     | NW_015505576.1                              | 800744-801769     | - |
| <i>Sinocyclocheilus rhinoceros</i> (Sr)  | taar12a    | TAAR4-like   | XP_016429344.1 | full    | - | -    | 1    | GCF_001515625.1 | -     | NW_015642822.1                              | 7441-8463;        | + |
| <i>Sinocyclocheilus rhinoceros</i> (Sr)  | taar12b    | TAAR4-like   | XP_016429345.1 | full    | - | -    | 1    | GCF_001515625.1 | -     | NW_015642822.1                              | 11768-12790       | + |
| <i>Sinocyclocheilus rhinoceros</i> (Sr)  | taar12c    | TAAR4-like   | XP_016400476.1 | full    | - | -    | 1    | GCF_001515625.1 | -     | NW_015667042.1                              | 16881-17915       | + |
| <i>Sinocyclocheilus rhinoceros</i> (Sr)  | taar12d    | TAAR4-like   | XP_016400475.1 | full    | ψ | I*   | 1    | GCF_001515625.1 | -     | NW_015667042.1                              | 21894-22787       | + |
| <i>Sinocyclocheilus rhinoceros</i> (Sr)  | taar12e    | TAAR4-like   | XP_016384356.1 | full    | - | -    | 1    | GCF_001515625.1 | -     | NW_015657344.1                              | 740-1759          | - |
| <i>Sinocyclocheilus rhinoceros</i> (Sr)  | taar12f    | TAAR4-like   | XP_016402534.1 | partial | - | -    | 1    | GCF_001515625.1 | -     | NW_015769517.1                              | 2-739             | - |
| <i>Sinocyclocheilus rhinoceros</i> (Sr)  | taar12g    | TAAR4-like   | XP_016429343.1 | full    | - | -    | 1    | GCF_001515625.1 | -     | NW_015642822.1                              | 2050-3213         | + |
| <i>Sinocyclocheilus rhinoceros</i> (Sr)  | taar13a1   | TAAR13c      | XP_016382319.1 | full    | - | -    | 1    | GCF_001515625.1 | -     | NW_015656152.1                              | 39210-40235       | + |
| <i>Sinocyclocheilus rhinoceros</i> (Sr)  | taar13a2   | -            | -              | partial | ψ | Z*   | 1    | GCF_001515625.1 | -     | NW_015632707.1                              | 688968-689471     | + |
| <i>Sinocyclocheilus rhinoceros</i> (Sr)  | taar13b    | TAAR13c-like | XP_016382289.1 | partial | ψ | III* | 1    | GCF_001515625.1 | -     | NW_015656152.1                              | 46150-46764       | + |
| <i>Sinocyclocheilus rhinoceros</i> (Sr)  | taar13c1   | TAAR13c-like | XP_016411245.1 | partial | - | -    | 1    | GCF_001515625.1 | -     | NW_015632707.1                              | 690850-697468     | + |
| <i>Sinocyclocheilus rhinoceros</i> (Sr)  | taar13c2   | TAAR13c-like | XP_016402954.1 | partial | - | -    | 1    | GCF_001515625.1 | -     | NW_015779853.1                              | 605-1060          | + |
| <i>Sinocyclocheilus rhinoceros</i> (Sr)  | taar13d    | TAAR13c-like | XP_016382320.1 | full    | - | -    | 1    | GCF_001515625.1 | -     | NW_015656152.1                              | 42268-43293       | + |
| <i>Sinocyclocheilus rhinoceros</i> (Sr)  | taar13e    | TAAR13c-like | XP_016382289.1 | full    | - | -    | 1    | GCF_001515625.1 | -     | NW_015656152.1                              | 45877-46764       | + |



**Representative reference TAAR sequences from all classes (class I, II, III) in several bony vertebrate species (mouse, zebrafish, stickleback, and fugu) used for phylogenetic analysis**

Amino acid sequences were taken from Hussain et al., PNAS 2009

| Species (Latin name and abbreviation) | Gene name | Synonyms/autom. predictions | Accession No/gene ID/Uniprot ID | chromosomal location |
|---------------------------------------|-----------|-----------------------------|---------------------------------|----------------------|
| M Mus musculus (Mm)                   | taar1     | TAAR1                       | NP_444435.1                     | 10                   |
| o Mus musculus (Mm)                   | taar2     | TAAR2                       | NP_001007267.1                  | 10                   |
| u Mus musculus (Mm)                   | taar3     | TAAR3                       | NP_001008429.1                  | 10                   |
| s Mus musculus (Mm)                   | taar4     | TAAR4                       | NP_001008499.1                  | 10                   |
| e Mus musculus (Mm)                   | taar5     | TAAR5                       | NP_001009574.1                  | 10                   |
| Mus musculus (Mm)                     | taar6     | TAAR6                       | NP_001010828.1                  | 10                   |
| Mus musculus (Mm)                     | taar8     | TAAR8a                      | NP_001010830.1                  | 10                   |
| Mus musculus (Mm)                     | taar9     | TAAR9                       | NP_001010831.1                  | 10                   |
| Z Danio rerio (Dr)                    | taar1b    | TAAR1                       | NP_001076373.1                  | 20                   |
| e Danio rerio (Dr)                    | taar10a   | TAAR10a                     | NP_001076367.1                  | 20                   |
| b Danio rerio (Dr)                    | taar11    | TAAR11                      | NP_001076546.1                  | 20                   |
| r Danio rerio (Dr)                    | taar12a   | TAAR12a                     | NP_001076578.1                  | 20                   |
| a Danio rerio (Dr)                    | taar12b   | TAAR12b                     | NP_001076573.1                  | 20                   |
| f Danio rerio (Dr)                    | taar12c   | TAAR12c                     | NP_001076564.1                  | 20                   |
| l Danio rerio (Dr)                    | taar12d   | TAAR12c                     | NP_001076564.1                  | 20                   |
| s Danio rerio (Dr)                    | taar12e   | TAAR12e                     | NP_001076563.1                  | 20                   |
| h Danio rerio (Dr)                    | taar12f   | TAAR12f                     | NP_001124143.1                  | 20                   |
| Danio rerio (Dr)                      | taar12g   | TAAR12g                     | NP_001076377.1                  | 20                   |
| Danio rerio (Dr)                      | taar12h   | TAAR12h                     | NP_001076378.1                  | 20                   |
| Danio rerio (Dr)                      | taar12i   | TAAR12a                     | NP_001076554.1                  | 20                   |
| Danio rerio (Dr)                      | taar12j   | TAAR12j                     | NP_001076380.1                  | 20                   |
| Danio rerio (Dr)                      | taar12k   | TAAR12h                     | NP_001076378.1                  | 20                   |
| Danio rerio (Dr)                      | taar12m   | TAAR4                       | XP_001920844.2                  | 15                   |
| Danio rerio (Dr)                      | taar13a   | TAAR64                      | NP_001076571.1                  | 20                   |
| Danio rerio (Dr)                      | taar13b   | TAAR13b                     | NP_001076511.1                  | 20                   |
| Danio rerio (Dr)                      | taar13c   | TAAR13c                     | NP_001076509.1                  | 20                   |
| Danio rerio (Dr)                      | taar13d   | TAAR13d                     | NP_001076510.1                  | 20                   |
| Danio rerio (Dr)                      | taar13e   | TAAR13e                     | NP_001076512.1                  | 20                   |
| Danio rerio (Dr)                      | taar14f   | TAAR14f                     | NP_001076382.1                  | 20                   |
| Danio rerio (Dr)                      | taar15a   | TAAR13c-like                | XP_009300776.1                  | 20                   |
| Danio rerio (Dr)                      | taar16a   | TAAR6-like                  | XP_009303959.1                  | 10                   |
| Danio rerio (Dr)                      | taar17a   | TAAR13c-like                | XP_021334896.1                  | 10                   |
| Danio rerio (Dr)                      | taar18a   | TAAR13c-like                | XP_021335131.1                  | 10                   |
| Danio rerio (Dr)                      | taar19a   | TAAR13c-like                | XP_017213596.1                  | 10                   |
| Danio rerio (Dr)                      | taar20a   | TAAR13c-like                | XP_017213576.1                  | 10                   |
| S Gasterosteus aculeatus (Ga)         | taar21a   | -                           | VDFJ01000095.1                  |                      |
| ti Gasterosteus aculeatus (Ga)        | taar22a   | -                           | VDFJ01000016.1                  |                      |
| ck Gasterosteus aculeatus (Ga)        | taar23    | -                           | VDFJ01000278.1                  |                      |
| le Gasterosteus aculeatus (Ga)        | taar24    | -                           | VDFJ01000206.1                  |                      |
| ba Gasterosteus aculeatus (Ga)        | taar25a   | -                           | VDFJ01000190.1                  |                      |
| ck Gasterosteus aculeatus (Ga)        | taar26a   | -                           | VDFJ01003622.1                  |                      |
| Gasterosteus aculeatus (Ga)           | taar27    | -                           | VDFJ01000276.1                  |                      |
| F Takifugu rubripes (Tr)              | taar28a   | -                           | GeneID:115247326                |                      |
| u                                     |           |                             |                                 |                      |
| g                                     |           |                             |                                 |                      |
| u                                     |           |                             |                                 |                      |

## Aminergic receptors used as outgroup in phylogenetic analysis

| Species (Latin name and abbreviation)         | Gene name        | Accession or genomic location (in case of missing accession)                         | Comments                      |
|-----------------------------------------------|------------------|--------------------------------------------------------------------------------------|-------------------------------|
| <b>Adrenergic receptors</b>                   |                  |                                                                                      |                               |
| <i>Branchiostoma belcheri</i> (Bbe)           | <i>adra1a</i>    | GeneID:109485326                                                                     |                               |
| <i>Callorhynchus milii</i> (Cm)               | <i>adra1a</i>    | GeneID:103191393                                                                     |                               |
| <i>Leptenteron camtschaticum</i> (Lec)        | <i>adra1a</i>    | GCA_000466285.1, contig KE993747.1, range 33178-34107 (+)                            |                               |
| <i>Mus musculus</i> (Mm)                      | <i>adra1a</i>    | GeneID:11549                                                                         |                               |
| <i>Mus musculus</i> (Mm)                      | <i>adra1b</i>    | GeneID:11548                                                                         |                               |
| <i>Leucoraja erinacea</i> (Le)                | <i>adra1b</i>    | AESE000000000.1, contig AESE012504078.1, range 1321-2283 (+)                         |                               |
| <i>Branchiostoma floridae</i> (Bfl)           | <i>adra2</i>     | Gene ID:7251590                                                                      |                               |
| <i>Ciona intestinalis</i> (Cin)               | <i>adra2</i>     | GeneID:100184338                                                                     | Annotated as <i>htr1a</i>     |
| <i>Leptenteron camtschaticum</i> (Lec)        | <i>adra2</i>     | GCA_000466285.1, contig KE993680.1, range 3745198-3746598 (+)                        |                               |
| <i>Mus musculus</i> (Mm)                      | <i>adra2a</i>    | GeneID:11551                                                                         |                               |
| <i>Rhinodon typus</i> (Rt)                    | <i>adra2a</i>    | GeneID:109933335                                                                     |                               |
| <i>Asymmetron lucayanum</i> (Alu)             | <i>adr8</i>      | GCA_001663935.1, contig LZCU01211521.1, range 1805-2977 (+)                          |                               |
| <i>Callorhynchus milii</i> (Cm)               | <i>adr81</i>     | GeneID:103186583                                                                     |                               |
| <i>Ciona intestinalis</i> (Cin)               | <i>adr8</i>      | GeneID:100177523                                                                     |                               |
| <i>Ciona savignyi</i> (Csa)                   | <i>adr8</i>      | GCA_000149265.1, contig CH002630.1, range 98843-100777 (+)                           |                               |
| <i>Leptenteron camtschaticum</i> (Lec)        | <i>adr8</i>      | GCA_000466285.1, contig KE993680.1, range 3147094 to 3148410(+)                      |                               |
| <i>Mus musculus</i> (Mm)                      | <i>adr81</i>     | GeneID:11554                                                                         |                               |
| <i>Rattus norvegicus</i> (Rat)                | <i>adr8</i>      | GeneID:24176                                                                         |                               |
| <i>Rhinodon typus</i> (Rt)                    | <i>adr8</i>      | GeneID:109923571                                                                     |                               |
| <b>Dopaminergic receptors</b>                 |                  |                                                                                      |                               |
| <i>Asymmetron lucayanum</i> (Alu)             | <i>drd1.5</i>    | GCA_001663935.1, contig LZCU01179855.1, range 3013-4119 (+)                          |                               |
| <i>Branchiostoma floridae</i> (Bfl)           | <i>drd1.5</i>    | GCA_000003815.1, contig GG666484.1, range 3478069-3479178 (-)                        |                               |
| <i>Callorhynchus milii</i> (Cm)               | <i>drd1</i>      | GeneID:103187244                                                                     |                               |
| <i>Mus musculus</i> (Mm)                      | <i>drd1a</i>     | GeneID:13488                                                                         |                               |
| <i>Petromyzon marinus</i> (Pm)                | <i>drd1</i>      | GCA_002833325.1, contig PIZI01000015.1, range 6404870-6406297 (-)                    |                               |
| <i>Rhinodon typus</i> (Rt)                    | <i>drd1</i>      | GeneID:109937715                                                                     |                               |
| <i>Danio rerio</i> (Dr)                       | <i>drd2</i>      | GeneID:282557                                                                        |                               |
| <i>Mus musculus</i> (Mm)                      | <i>drd2</i>      | GRCh38.p8, contig NC_000075.6, range 49395616-49407091 (+)                           |                               |
| <i>Danio rerio</i> (Dr)                       | <i>drd3</i>      | GRCh21, contig NC_007136.7, range 4708538-4732991 (-)                                |                               |
| <i>Mus musculus</i> (Mm)                      | <i>drd3</i>      | GeneID:13490                                                                         |                               |
| <i>Branchiostoma floridae</i> (Bfl)           | <i>drd4</i>      | GeneID:7249502                                                                       |                               |
| <i>Danio rerio</i> (Dr)                       | <i>drd4a</i>     | GeneID:503564                                                                        |                               |
| <i>Mus musculus</i> (Mm)                      | <i>drd4</i>      | GeneID:13491                                                                         |                               |
| <i>Leucoraja erinacea</i> (Le)                | <i>drd5</i>      | WGS_VDB://AESE01, contig AESE011486231.1, range 406-1725 (+)                         |                               |
| <i>Mus musculus</i> (Mm)                      | <i>drd5</i>      | GeneID:13492                                                                         | Synonym <i>drd1b</i>          |
| <i>Rhinodon typus</i> (Rt)                    | <i>drd5</i>      | GeneID:109916214                                                                     | Annotated as <i>drd1-like</i> |
| <b>Histaminergic receptors</b>                |                  |                                                                                      |                               |
| <i>Danio rerio</i> (Dr)                       | <i>hrh1</i>      | GeneID:735302                                                                        |                               |
| <i>Mus musculus</i> (Mm)                      | <i>hrh1</i>      | GeneID:15485                                                                         |                               |
| <i>Asymmetron lucayanum</i> (Alu)             | <i>hrh2</i>      | GCA_001663935.1, contig LZCU01123976.1, range 103-1209 (-)                           |                               |
| <i>Branchiostoma floridae</i> (Bfl)           | <i>hrh2</i>      | GCA_000003815.1, contig GG666476.1, range 1325027-1326103 (+)                        |                               |
| <i>Danio rerio</i> (Dr)                       | <i>hrh2</i>      | GeneID:25461                                                                         |                               |
| <i>Danio rerio</i> (Dr)                       | <i>hrh2b</i>     | GeneID:100005590                                                                     |                               |
| <i>Leucoraja erinacea</i> (Le)                | <i>hrh2</i>      | WGS_VDB://AESE01, contig AESE0107911.1, range 742-1827 (-)                           |                               |
| <i>Rattus norvegicus</i> (Rat)                | <i>hrh2</i>      | GeneID:25461                                                                         |                               |
| <i>Rhinodon typus</i> (Rt)                    | <i>hrh2</i>      | GeneID:109918887                                                                     |                               |
| <i>Danio rerio</i> (Dr)                       | <i>hrh3</i>      | GeneID:561773                                                                        |                               |
| <i>Rhinodon typus</i> (Rt)                    | <i>hrh3</i>      | GeneID:109927117                                                                     |                               |
| <i>Danio rerio</i> (Dr)                       | <i>hrh4</i>      | Gene ID:100334962                                                                    |                               |
| <b>Muscarinic acetylcholine receptors</b>     |                  |                                                                                      |                               |
| <i>Branchiostoma belcheri</i> (Bbe)           | <i>chm</i>       | GeneID:109479226                                                                     |                               |
| <i>Ciona intestinalis</i> (Cin)               | <i>chm1-5</i>    | GeneID:100182166                                                                     |                               |
| <i>Ciona savignyi</i> (Csa)                   | <i>chm1-5</i>    | GCA_000149265.2, contig CH001357.1, range 38054-39553 (-)                            |                               |
| <i>Ciona savignyi</i> (Csa)                   | <i>chm</i>       | GCA_000149265.1, contig CH002155.1, range 846677-855548 (+)                          |                               |
| <i>Mus musculus</i> (Mm)                      | <i>chm1</i>      | ENSMUSG0000032773                                                                    |                               |
| <i>Danio rerio</i> (Dr)                       | <i>chm2a</i>     | GeneID:352938                                                                        |                               |
| <i>Danio rerio</i> (Dr)                       | <i>chm2b</i>     | GeneID:100149598                                                                     |                               |
| <i>Mus musculus</i> (Mm)                      | <i>chm4</i>      | GeneID:12672                                                                         |                               |
| <i>Petromyzon marinus</i> (Pm)                | <i>chm</i>       | GCA_002833325.1, contig PIZI01000025.1, range 2511456-2513136 (-)                    |                               |
| <i>Rhinodon typus</i> (Rt)                    | <i>chm</i>       | GeneID:109911563                                                                     |                               |
| <b>Serotonergic receptors</b>                 |                  |                                                                                      |                               |
| <i>Callorhynchus milii</i> (Cm)               | <i>htr1b</i>     | GeneID:103175228                                                                     |                               |
| <i>Callorhynchus milii</i> (Cm)               | <i>htr1d</i>     | GeneID:103179607                                                                     |                               |
| <i>Callorhynchus milii</i> (Cm)               | <i>htr1a</i>     | GeneID:100001828                                                                     |                               |
| <i>Danio rerio</i> (Dr)                       | <i>htr1b</i>     | GeneID:100004819                                                                     |                               |
| <i>Leucoraja erinacea</i> (Le)                | <i>htr1</i>      | WGS_VDB://AESE01, contig AESE011561756.1, range 155-1153 (+)                         |                               |
| <i>Mus musculus</i> (Mm)                      | <i>htr1b</i>     | GeneID:319405                                                                        |                               |
| <i>Petromyzon marinus</i> (Pm)                | <i>htr1a</i>     | GCA_002833325.1, contig PIZI01000013.1, range 14953024-14954822 (+)                  |                               |
| <i>Rhinodon typus</i> (Rt)                    | <i>htr1</i>      | GeneID:109924543                                                                     |                               |
| <i>Rhinodon typus</i> (Rt)                    | <i>htr1b</i>     | GeneID:109927187                                                                     |                               |
| <i>Ciona savignyi</i> (Csa)                   | <i>htr2b</i>     | GCA_000149265.1, contig CH003080.1, range 117045-118924 (-)                          |                               |
| <i>Danio rerio</i> (Dr)                       | <i>htr2b</i>     | GeneID:751784                                                                        |                               |
| <i>Rattus norvegicus</i> (Rat)                | <i>htr2a</i>     | GeneID:29595                                                                         |                               |
| <i>Anguilla japonica</i> (Aj)                 | <i>htr4-like</i> | GCA_003597225.1, contig BEWY01000739.1, range 143720-158412 (+)                      |                               |
| <i>Asymmetron lucayanum</i> (Alu)             | <i>htr4</i>      | GCA_001663935.1, contigs LZCU01069842.1, LZCU01138971.1, ranges 2645-4248, 3-464 (+) |                               |
| <i>Branchiostoma belcheri</i> (Bbe)           | <i>htr4</i>      | GeneID:109485254                                                                     |                               |
| <i>Branchiostoma floridae</i> (Bfl)           | <i>htr4</i>      | GeneID:118414956                                                                     |                               |
| <i>Branchiostoma lanceolatum</i> (Bl)         | <i>htr4</i>      | GCA_900088365.1, contig FLL001000036.1, range 925959-928070 (+)                      |                               |
| <i>Callorhynchus milii</i> (Cm)               | <i>htr4</i>      | GeneID:103191306                                                                     |                               |
| <i>Callorhynchus milii</i> (Cm)               | <i>htr4-like</i> | GeneID:103185514                                                                     |                               |
| <i>Danio rerio</i> (Dr)                       | <i>htr4</i>      | Gene ID:101.882850, chromosome 14                                                    |                               |
| <i>Danio rerio</i> (Dr)                       | <i>htr4-like</i> | GeneID:55089                                                                         |                               |
| <i>Gasterosteus aculeatus</i> (Ga)            | <i>htr4</i>      | GCA_000180675.1, contig AANH01006599.1, range 101622-116517 (-)                      |                               |
| <i>Gasterosteus aculeatus</i> (Ga)            | <i>htr4-like</i> | GCA_000180675.1, contig AANH01004594.1, range 57896-60366 (-)                        |                               |
| <i>Leposteus oculatus</i> (Lo)                | <i>htr4</i>      | LepDou1, LG4, contig NC_023184.1, range 3778639-37712455 (-)                         |                               |
| <i>Leposteus oculatus</i> (Lo)                | <i>htr4-like</i> | LepDou1, LG2, contig NC_023180.1, range 51326623-51338351 (+)                        |                               |
| <i>Leptenteron camtschaticum</i> (Lec)        | <i>htr4</i>      | GCA_000466285.1, contig KE993680.1, range 1331383-1338029 (-)                        |                               |
| <i>Leucoraja erinacea</i> (Le)                | <i>htr4</i>      | WGS_VDB://AESE01, contig AESE010074862.1, AESE011513946.1, 33-236,397-960 (+)        |                               |
| <i>Mus musculus</i> (Mm)                      | <i>htr4</i>      | GeneID:15562                                                                         |                               |
| <i>Nanorana parkeri</i> (Np)                  | <i>htr4</i>      | GeneID:108784291                                                                     |                               |
| <i>Petromyzon marinus</i> (Pm)                | <i>htr4</i>      | XP_032806628.1                                                                       |                               |
| <i>Ptychodera flava</i> (Pfl)                 | <i>htr4</i>      | GCA_001465055.1, contig LD352455.1, range 57543-56371 (-)                            |                               |
| <i>Rhinodon typus</i> (Rt)                    | <i>htr4</i>      | GeneID:109927282                                                                     |                               |
| <i>Saccoglossus kowalevskii</i> (SakG)        | <i>htr4</i>      | GeneID:100374682                                                                     |                               |
| <i>Xenopus tropicalis</i> (Xt)                | <i>htr4</i>      | GeneID:100493952, chromosome 3                                                       |                               |
| <i>Xenopus laevis</i> (Xl)                    | <i>htr4.S</i>    | GeneID:496394                                                                        |                               |
| <i>Ciona intestinalis</i> (Cin)               | <i>htr5</i>      | GeneID:104265465                                                                     |                               |
| <i>Ciona savignyi</i> (Csa)                   | <i>htr5</i>      | GCA_000149265.1, contig CH003386.1, range 620733-623491 (-)                          |                               |
| <i>Danio rerio</i> (Dr)                       | <i>htr5a</i>     | GeneID:388475                                                                        |                               |
| <i>Leptenteron camtschaticum</i> (Lec)        | <i>htr5</i>      | GCA_000466285.1, contig KE993731.1, range 1661553-1662305 (-)                        |                               |
| <i>Mus musculus</i> (Mm)                      | <i>htr5a</i>     | GeneID:15563                                                                         |                               |
| <i>Danio rerio</i> (Dr)                       | <i>htr6</i>      | GeneID:568269                                                                        |                               |
| <i>Mus musculus</i> (Mm)                      | <i>htr6</i>      | GeneID:15565                                                                         |                               |
| <i>Rhinodon typus</i> (Rt)                    | <i>htr6</i>      | GeneID:109917804                                                                     |                               |
| <i>Ciona intestinalis</i> (Cin)               | <i>htr7</i>      | GCF_000224145.3, NC_020173.2, range 2187887-2192745 (-)                              |                               |
| <i>Ciona savignyi</i> (Csa)                   | <i>htr7</i>      | GCA_000149265.1, contig CH000164.1, range 44580-52046 (-)                            |                               |
| <i>Danio rerio</i> (Dr)                       | <i>htr7</i>      | GeneID:100536080                                                                     |                               |
| <i>Mus musculus</i> (Mm)                      | <i>htr7</i>      | GeneID:15566                                                                         |                               |
| <b>Unclassified aminergic receptors (AmR)</b> |                  |                                                                                      |                               |
| <i>Ciona intestinalis</i> (Cin)               | <i>AmR</i>       | GeneID:101242922                                                                     |                               |
| <i>Ciona savignyi</i> (Csa)                   | <i>AmR1</i>      | GCA_000149265.1, contig CH002901.1, range 1249970-1251418 (-)                        |                               |
| <i>Ciona savignyi</i> (Csa)                   | <i>AmR2</i>      | GCA_000149265.1, contig CH000120.1, range 16409-17671 (-)                            |                               |

## SUPPLEMENTARY INFORMATION

SI Table 2: Intron position in *htr4*, *taar* and *tarl* genes

### **Olfactory function in the trace amine-associated receptor family (TAARs) evolved twice independently**

Milan Dieris<sup>1</sup>, Daniel Kowatschew<sup>1</sup>, and Sigrun I. Korsching<sup>1\*</sup>

<sup>1</sup>Institute for Genetics, University at Cologne, Germany

\*Corresponding author, [sigrun.korsching@uni-koeln.de](mailto:sigrun.korsching@uni-koeln.de)

**SI Table 2** MSA shows differentially conserved **intron borders** in **chordate** and **vertebrate htr4**

Sako-htr4 MESGITSSTDAIS-----YHSFALDKTSRVYVLEVFDTDTGEPVIGAVNDNSTGLSGNVL-  
PtFl-htr4 M-----STNNIHGLPYVFESSDTPATSAVVFVELETTRQPFLITNDNASTWAVSGGVQP  
**alu-htr4** M-----TTIVTMSGYNTTQALGIPGTDLRTVQPVTNWNTNGSLGCTETYIG  
**bfl-htr4** M-----TTIVSMSDYNTTQALAVPETHHVRTVQPGANGTNGSSGCTEAYLG  
**Bla-htr4** M-----TTIVSMSDFNTTQALVVPETHPLRTAPPVTNHTNGSTGCTESYLG  
**Pm-htr4** -----MYGNNTTF-----**NNDE**-----  
**Rt-htr4** -----MDEADVNE-----**STSD**---GEPHEI  
**Dr-htr4** MQGCEFPQEDSCHGTGQMPMEMEVDTN**E**-----**SN**-----  
**Mm-htr4** -----MDKLDANV-----SSNE-----  
Dr-tarl1 -----ME--NTSE-----WSNNSLDSDFEACA  
Pm-tarl1a -----MDPPSSSV-----AAPSSPASSNSVQGSFSCPG  
Rt-taarIId -----MN-LSDHE-----NSDNVQYCFEFVNTS-----CAR  
Dr-taar13c -----MD-LSSQE-----YDPSQFCFPVAVNS-----CLK

Sako-htr4 -QYGLAERIIIGFVLTVIIILTIAGNILVCASIFIFPSLRTL-TNYFVFLAIADILVAC  
PtFl-htr4 GSFNVAERIVIGFILSLIILTTIVGNILVCTSIIIFPSLRTL-TNYFVFLAIADVLVAC  
**alu-htr4** PQYSLTV**QV**LLSSFLALVILLTIVGNILVISTVALFRSLRSL-TNYF**VV**SLAVADLLVGV  
**bfl-htr4** PQYSLEI**QV**LLSSFLALVILLTIVGNILVISTVALFRSLRSL-TNYF**VV**SLAVADLLVGV  
**Bla-htr4** PQYSLVI**QI**LLSCFLALVILLTIVGNILVISTVALFRSLRSL-TNYF**VV**SLAVADLLVGV  
**Pm-htr4** -TSSQAEKYILAGIFSIIIAVTILGNLLVVAVCKDRHL**RK**IKTNYFIVSLAVADLLVAI  
**Rt-htr4** PGFSILQKTVLITFLSAIMVMTILGNLLVMVAVCKDRQL**RK**IKTNYFIVSLAFADLLVSV  
**Dr-htr4** ---GLAKRVALISFLSLVMLMSVLGNLLVMVAVCKDRQL**RK**IKTNYFIVSLAFADLLVSV  
**Mm-htr4** -GFRSVEKVLLTFLAVVILMAILGNLLVMVAVCRDRQL**RK**IKTNYFIVSLAFADLLVSV  
Dr-tarl1 TLRFSGRVALYLFIITGILCTVVGNFVLAIAFYKQLQCP-TNSFVMSLAVADFLVGL  
Pm-tarl1a SALSSAQRAAWLAMMSVAMASAVLGNLLVVASVLFHFRRLQTR-TNAFTASLAVDLLVGL  
Rt-taarIId VTRSIAINVALYIFIITSILITIFGNLVVIVSVLHFKQLQTP-TNLLSSLAVVDFLVGF  
Dr-taar13c GTHHVSTQTVVYLILASAMTVTVLGNVSVIIISIAHFKQLQTP-TNILVMSLALADLLLGL  
\* \* \* \* \*

Sako-htr4 LVMTFSTINVVTETWIYGDTFCLIFISFDISFCTASIMHLSCIAFDRYSAI-CNPFQYPL  
PtFl-htr4 LVMAISTIYIVTETWYGDTFCLVFIISFDIAFCTASIMHLSCIAFDRYSAI-CNPFQYPI  
**alu-htr4** IVMTLGTQYEVSGRWRHGEIFCLVFTSMDVSLTTCSIMHLSCIAFDRYYAI-CHPFKYPT  
**bfl-htr4** IVMTLGTQYEVSGRWRHGEIFCLVFTSMDISLTTCSIMHLSCIAFDRYYAI-CHPFKYPT  
**Bla-htr4** IVMTLGTQYEVSGRWRHGEIFCLVFTSMDISLTTCSIMHLSCIAFDRYYAI-CHPFKYPT  
**Pm-htr4** LVMPFGAVERVQNDWPYGDKFCIIRTSFDVMFTTASIMHLCCIALD**RY**YAIACCPLVYQN  
**Rt-htr4** VMMPFGAIELIQQNWYIGDRFCLVRTSLDVLLTTASILHLCCISLD**RY**YAIACCQPLVYRN  
**Dr-htr4** LVMPFGAIELIHQNWYIGETFCVVRTSLDVLLTTASILHLCCISLD**DR**YAIACCQPLVYRN  
**Mm-htr4** LVMPFGAIELVQDIWAYGEMFCLVRTSLDVLLTTASIFHLCCISLD**RY**YAIACCQPLVYRN  
Dr-tarl1 VVMPYSMVRTVEGCWYFGPTFCHLHSSLDVMLCTASIFHLSCIAFDRYYAV-CNPLVYSF  
Pm-tarl1a LVMPFKMTRSAYGCWYFGTAFCAAHTCLDIALCTASILHLACIAFDRHVAV-CDPLRYAQ  
Rt-taarIId IVLPYSMVRVVEKWCWYFGEVFKIHSITEIVLTVVSIYTLCFIAIDRYYAM-CDPLFYSV  
Dr-taar13c VVMPFSMIRSVGDCWYYGETFCLLHTGFDLFTSVSIFHLIFIAVDRHQAV-CFPLQYPT  
\* \* \* \* \*

Sako-htr4 KMTSRRVTIMLASCWVPMFISFIPILLQWNTIGIENVIADVKNF--AGPYSCIFLVNKP  
PtFl-htr4 KMTSRRVAVMLAACWVPMFISFIPILLGWNTLGIENVIAEVKQH--TGNPNSCVFLVNRP  
**alu-htr4** KMTHRKMVMIAMCWVVPVIAAWVPMNGWNTLNIAXXXXXXXXXX--XXXXXXXXXXXXXX  
**bfl-htr4** KMSHRKMVLMIAMCWVVPVIMAYVPMNRWNTIGIEPVVEDTKCA--LGPESCFLVNKE  
**Bla-htr4** KMSHRKMVLMIAMCWVVPVIMAYVPMNRWNTIGIEPVVEDTKCE--LGPDSCFLVNKE  
**Pm-htr4** KMTPLRVGLMLGACWVPSLISFIPANGWNIIGIEQ**QL**ELRGQAKEANQTHCIFMVNKP  
**Rt-htr4** KMTPLRITIMLGGCWIIPSFISFLPIMQGWNIIGIQE**LVE**ERKSSNDTNI TKVFMVNKP  
**Dr-htr4** KMTPLRVTLMIGGCWIIPTVISFLPIMQGWNSIGIKD**LID**KRKIS--GNSTVCVFMVNKP  
**Mm-htr4** KMTPLRIALMLGGCWVLPFISFLPIMQGWNIIGIVD**VI**EKRKFSHNSNSTWCVFMVNKP  
Dr-tarl1 KMSRKRVGLLIVVCWAI PFLISFGPILFGLHKLGVDIPLPE-----NMCVFLVNRI  
Pm-tarl1a RVTARHVAAMVALSWCCGAVISVTVVSLGWNVVGVPDEVVAA-----SCADSCDFLLGAP  
Rt-taarIId KITLPVTVMTIILIWLFVAVFYGLSVFLLDFSKKSVDDYVAVR-----SCEGSCI-AYHKF  
Dr-taar13c RITIPVAWVMVMISWSMAAFYSYGVVYSKANLEGLEEYIASV-----YCMGGCTLYFNAL  
\*

Sako-htr4 YAVIASTIAFYMPCILMATAYFFIFRAARKQAQIKSL-ERATMNWNN-TRNGPGDGH--  
 PtFl-htr4 YAAVASTIAFYIPCIILMASAYLFI FRAARKQAAQIKSL-ERATANWNN-ARNGESGGR--  
**alu-htr4** XXXXXXXXXXXXXXXAVLMILAYYQVYRVARRQMORIISV-EGAAPNNEN-----  
**bfl-htr4** FSLIASTLSFYLPVMMTLAYYQVYRAARRQMQQIISL-ERSMNNEN-----  
**Bla-htr4** FSLIASTLSFYLPAIMMTLAYYQVYRAARRQMQQIISL-ERAMNNEN-----  
**Pm-htr4** YAVACSLVAFYIPLGLMAAAYQRIYVTARAHARQIGSL-QRAVSKDTT-GDEVMTMVTSGA  
**Rt-htr4** FAITCSVVAFYVPLLLMVLAYQRIYVTAREHARQIEML-KRAGTSTDS-GQQ-----  
**Dr-htr4** YALTCSVVAFYLPVLMVLAYQRIYVTAREHARQISML-QRAGGAGNA--DS-----  
**Mm-htr4** YAITCSVVAFYIPFLMVLAYYRIYVTAKEHAQQIQML-QRAGATSESRQP-----  
 Dr-tarl1 YAVMASLVAFYLPVMTMLVAYWKIYKAAKRQAMQISAM-EAQMAAGVG-KDS-----  
 Pm-tarl1a YAVGSSVCSFFGPAAFVAVAYARILREARRQGRAIACEQEKKQQQONEDQGRQEDGVGEGG  
 Rt-taarIId EGHIDALIVFFIPIFIIILGIYVKIFFVTRKRCRKIENMPNDSHCTEEN-----  
 Dr-taar13c WSVLDTLLTFFLPCSVMVGLYARIFVVAKKHIKSI T---EANQNNEN-----

\* \* \*

Sako-htr4 -----PHHHGRRVSLAAEKKAAKTLGIIMGCFTICWCPFFVFNIVDPFCD  
 PtFl-htr4 -----GSVSLAAEKKAAKTLGIIMGCFTVCWCPFFVLNIIDPFCD  
**alu-htr4** -----TRREKKAAKTLGIIMGCFLVCWMPFFVTNIIDPLCG  
**bfl-htr4** -----MRREKKAAKTLGIIMGCFLVCWMPFFVANIVEPLCG  
**Bla-htr4** -----MRREKKAAKTLGIIMGCFLVCWMPFFVANIVEPLCG  
**Pm-htr4** ASPLRAQQQLVPVAQATMVQTSSTRFRHETKAAKTLAIIMGCFCWCWAPFFINNVIDPFVN  
**Rt-htr4** -----ADHSGNHRMKTETKAAKTLICIIMGCFCWCWAPFFITNIVDPFIN  
**Dr-htr4** -----ADHQNRHRMRTETKAAKTLICIIMGCFCWCWAPFFITNVVDPFID  
**Mm-htr4** -----ADQHSTHRMRTETKAAKTLVICMGCFCFCWAPFFVTNIVDPFID  
 Dr-tarl1 -----SKKQKHRNSIRREKKAAKTLGIIMGVFLLFWLPPFTVNIIDPFIE  
 Pm-tarl1a RGGARGEMTAPAGKATQAVGRAADAKSERNATKMLSIVVGI FLASWLPFFLMNVSDPLLG  
 Rt-taarIId -----NVTIMHKKDQIVVRKQDILIGIFTFSWLPFYVNSILNPYFD  
 Dr-taar13c -----VFKNPRRSERKAAKTLGIVVGAFILCWLPPFFINSLVDPYIN

\* \* \* \* \*

Sako-htr4 FCIDPG---AWPPVTWLGYNINMLNPLLYAFFNRSFRAAFIRLLRC-----  
 PtFl-htr4 FCISPK---VWPPITWLGYNINMLNPILYAFFNRTFRAAFSRLLR-----  
**alu-htr4** YCIAQSCELCLKFFLWLGYNINSTLNPMIYAFFNRSFRAAFKRILSCS-----  
**bfl-htr4** YCITRSCDLCLKFFLWLGYNINSTLNPMIYAFFNRSFRAAFKRILSCS-----  
**Bla-htr4** YCITRSCALCSKFFLWLGYNINSTLNPMIYAFFNRSFRAAFKRILSCS-----  
**Pm-htr4** YDTPQQ---LWDACLWLGYNANSALNPLLYAFLNRSFRAFLAILCCWDARYRRSSFSSHS  
**Rt-htr4** YSVPEQ---LWTACLWLGYNINSGFNPFYAYLNKSFRAFLRILCCGD-RYRRSLLGQT  
**Dr-htr4** YSVPEQ---LWAAACLWLGYNINMLNPILYAFLNKSFRAFLIILCCGHKRYRRPSILGPG  
**Mm-htr4** YTVEPQ---VWTAFLWLGYNINSGLNPFYAYLNKSFRAFLIILCCDDERYKRPPILGQT  
 Dr-tarl1 YGTAVV---IWDVFLWLGYNINSSLNPFYGFNRSFRAFLMIMGCR-----  
 Pm-tarl1a YSIDPR---AWEAVTWLGYNANSAANPVIYIGIFSPNFRAAFRVIAR-----  
 Rt-taarIId FLIPPV---LDSVFAWFGFNSTLNPLLYAFLYPWFRKSLKLI LSC-----  
 Dr-taar13c FSTPYA---LFDAGWLGYTNSTLNPIIYGLFYPWFRKTL SLIVTL-----

\* \* \* \* \*

Sako-htr4 -----HVCKGTTAEFDPTISSRER-----  
 PtFl-htr4 -----HVCKGSAAEFDPTITSHER-RS-----  
**alu-htr4** -----SCCDLDRDFDPAVSTALQGRTRSRRRPNGDVVN-----NS  
**bfl-htr4** -----SCCDLDRDFDPAVSTALQRRSTRHQ-NGEAVN-----NT  
**Bla-htr4** -----SCCDVDRDFDPAVSTALQGRSSRRHQ-NGEVVN-----NT  
**Pm-htr4** VRYS-VSTNGSAVQVPV**S**--ARVRARARLPSRPRTRAAAPAVSKAPSPV  
**Rt-htr4** IPCSATTINGSAHVLR-----  
**Dr-htr4** TTCTATQINGSTHV**LK**YAVLH----NGNHNEQEKLSIQNDTESQESCF-  
**Mm-htr4** VPCSTTTINGSTHV**L**RDVTEC----GGQWESRCHLTATSPLVAAQPSDT  
 Dr-tarl1 -----ICLHGSAQGMDSLHSHKRDG-----NERTDN-----  
 Pm-tarl1a -----SAFRAGSRDVQLG--F-----  
 Rt-taarIId -----QIFNTDPSTVNF LSE-----  
 Dr-taar13c -----RIFEPNSSDINLFTV-----

## SI Table 2 Multiple sequence alignment (MSA) of 9 HTR4, 2 TARL and 2 TAAR sequences.

Sequences are given by species abbreviation and gene name, for full species names and further details see SI Table 1. Introns were predicted with Genewise 2 (Birney et al., 2004). Note the differential conservation of **intron borders** in **lancelet** (alu, bfl, bla) vs. **vertebrate** (Pm, Rt, Dr, Mm) *htr4*. The MSA was generated using MAFFT v7.471, E-INS-i setting, (Kato and Standley, 2013), and sequence positions with over 85% gaps were removed using Gapstreeze (<http://hcv.lanl.gov/content/sequence/GAPSTREEZE/gap.html>).

## References

Birney E., Clamp, M. & Durbin, R. (2004) GeneWise and Genomewise. *Genome Research* **14**, 988–995.

Kato K. & Standley D.M. (2013) MAFFT Multiple Sequence Alignment Software Version 7: Improvements in Performance and Usability. *Molecular Biology and Evolution* **30**, 772–780.
